# Supplementary material for: Integrating Metabolomics and Transcriptomics to Unveil Atisine Biosynthesis in Aconitum gymnandrum Maxim
Source: MDPI journal article supplement (doi:10.3390/ijms232113463), 2022-11-03
Supplement: s1 [file s1]

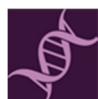

Supplementary Material

# Integrating Metabolomics and Transcriptomics to Unveil Atisine Biosynthesis in *Aconitum gymnandrum* Maxim

Lingli Chen <sup>†</sup>, Mei Tian <sup>†</sup>, Baolong Jin, Biwei Yin, Tong Chen, Juan Guo, Jinfu Tang, Guanghong Cui <sup>\*</sup> and Luqi Huang <sup>\*</sup>

State Key Laboratory Breeding Base of Dao-di Herbs, National Resource Center for Chinese Materia Medica, China Academy of Chinese Medical Sciences, Beijing 100700, China

<sup>\*</sup> Correspondence: cuigh@nrc.ac.cn (G.C.); huanglq@cacms.cn (L.H.)

<sup>†</sup> These authors contributed equally to this work.

**Citation:** Chen, L.; Jin, B.; Tian, M.; Yin, B.; Chen, T.; Chun, L.; Guo, J.; Tang, J.; Li, W.; Cui, G.; et al. Integrating Metabolomics and Transcriptomics to Unveil Atisine Biosynthesis in *Aconitum gymnandrum* Maxim. *Int. J. Mol. Sci.* **2022**, *23*, 13463. <https://doi.org/10.3390/ijms232113463>

Academic Editor: Milen I. Georgiev

Received: 22 September 2022

Accepted: 1 November 2022

Published: 3 November 2022

**Publisher's Note:** MDPI stays neutral with regard to jurisdictional claims in published maps and institutional affiliations.

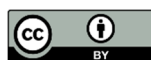

**Copyright:** © 2022 by the authors. Submitted for possible open access publication under the terms and conditions of the Creative Commons Attribution (CC BY) license (<https://creativecommons.org/licenses/by/4.0/>).

# Supplementary Figures

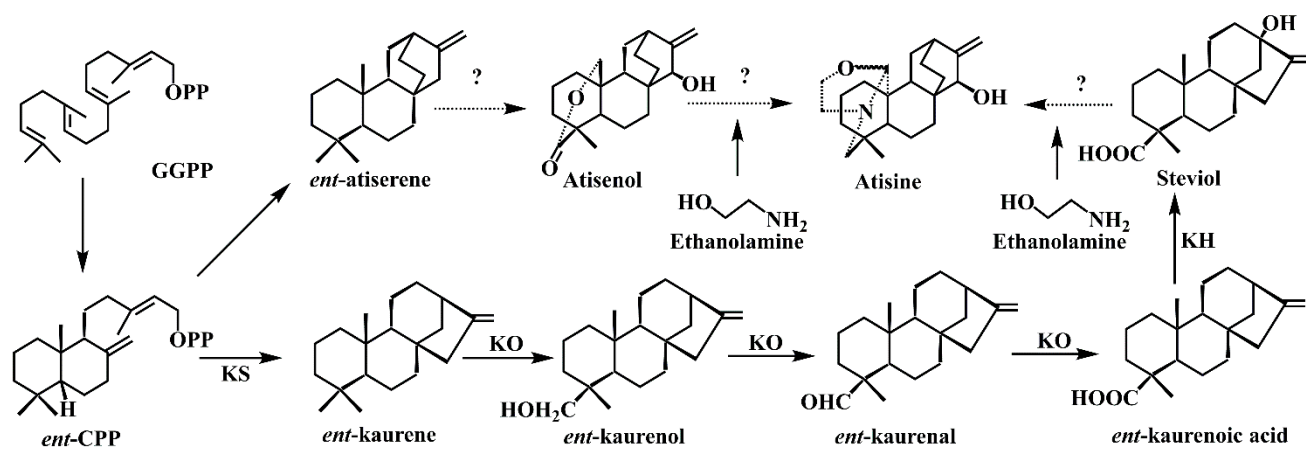

**Supplementary Figure S1.** Speculative diterpene biosynthetic pathway forming atisine in *A. heterophyllum*. Question marks indicate missing enzymes.

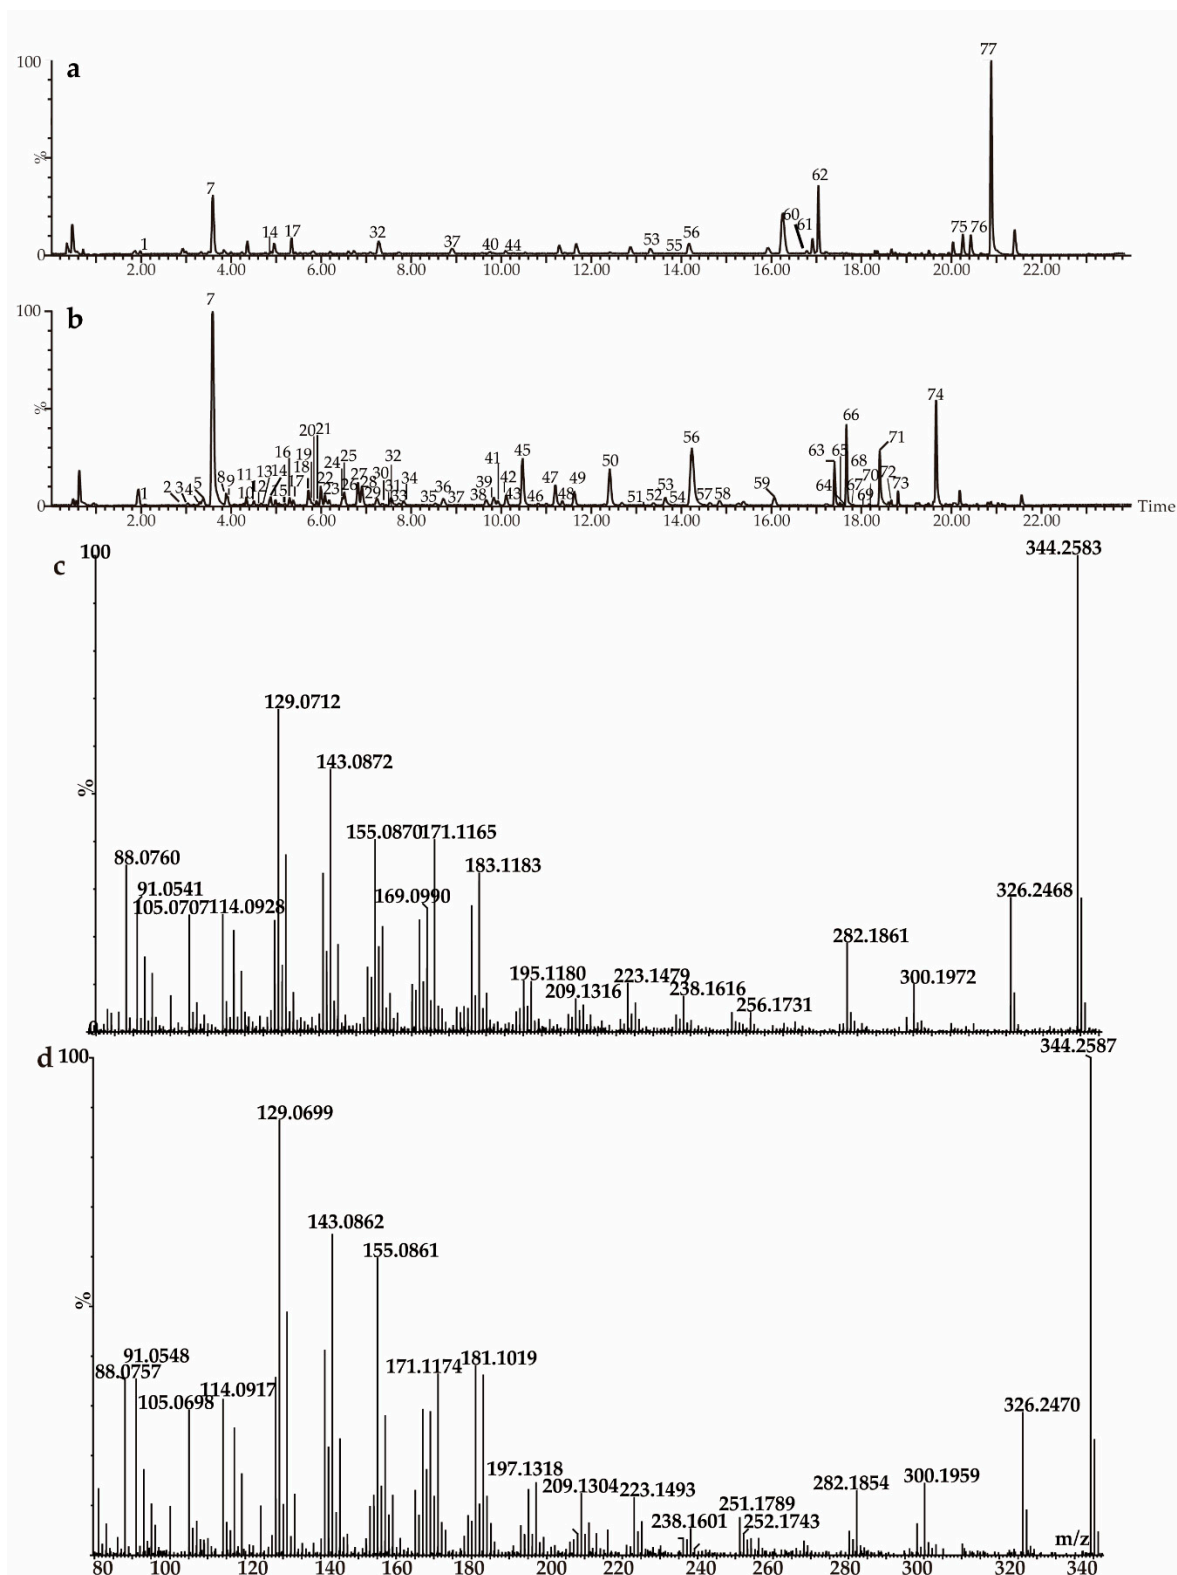

**Supplementary Figure S2.** The base peak ion diagram of *A. gymnandrum*, the peak number is the same as that in TabS1. (a) Chromatogram of aerial portions; (b) Chromatogram of root; (c) Mass spectrum of atisine reference substance; (d) Mass spectrum of atisine in the sample group.

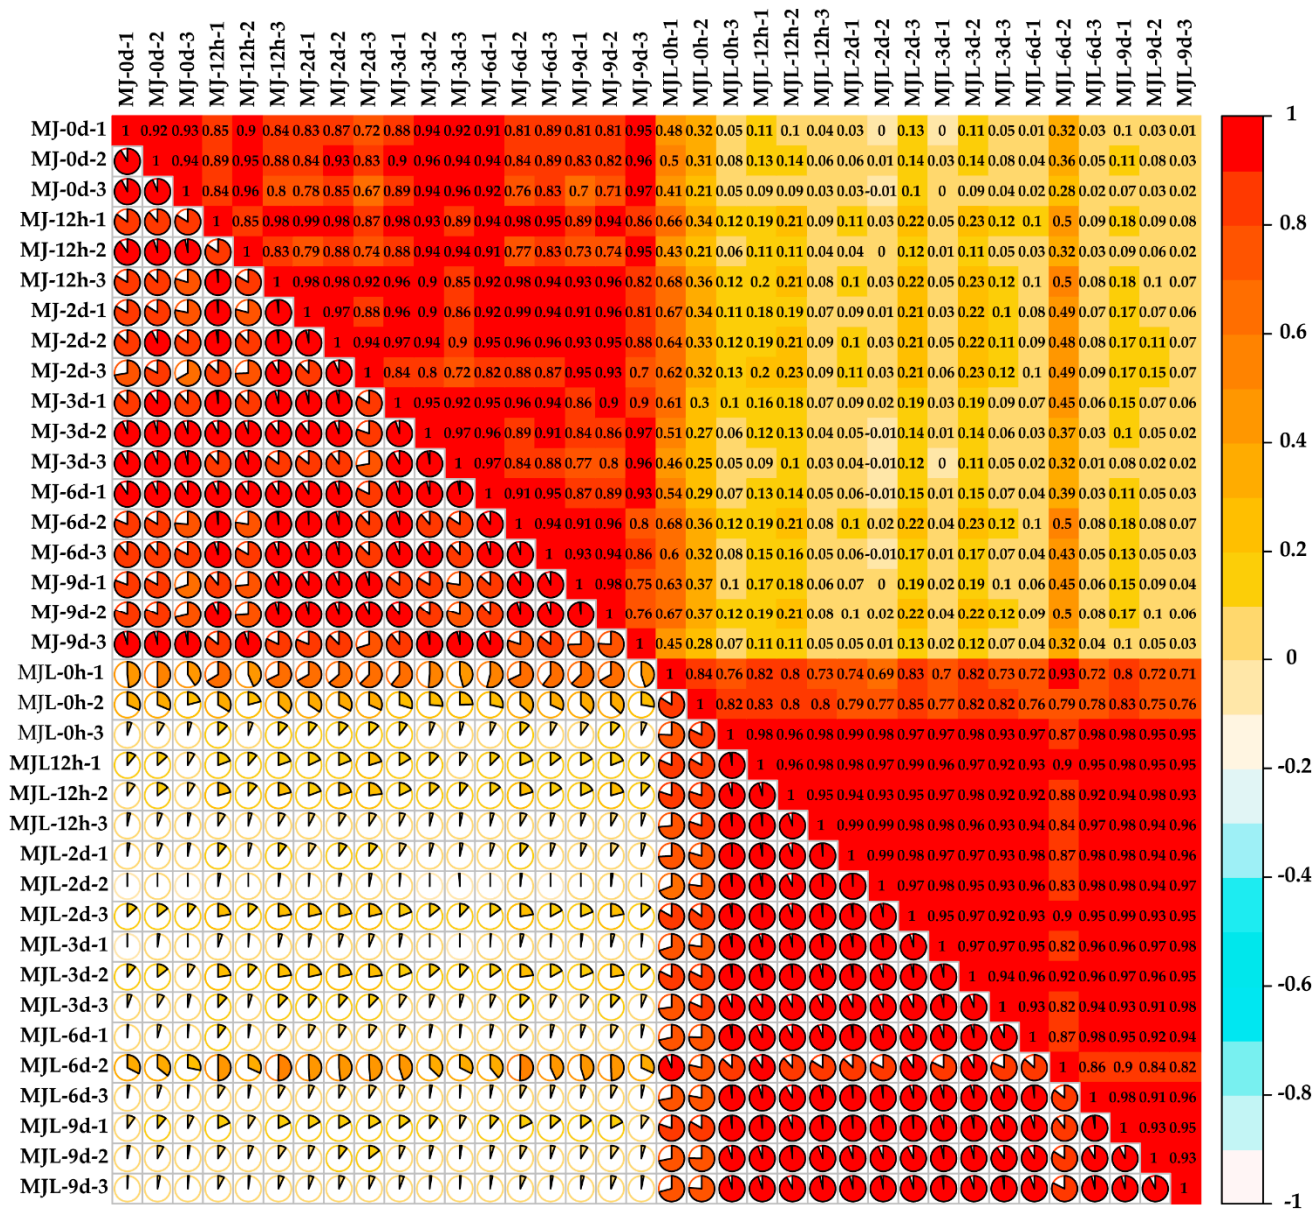

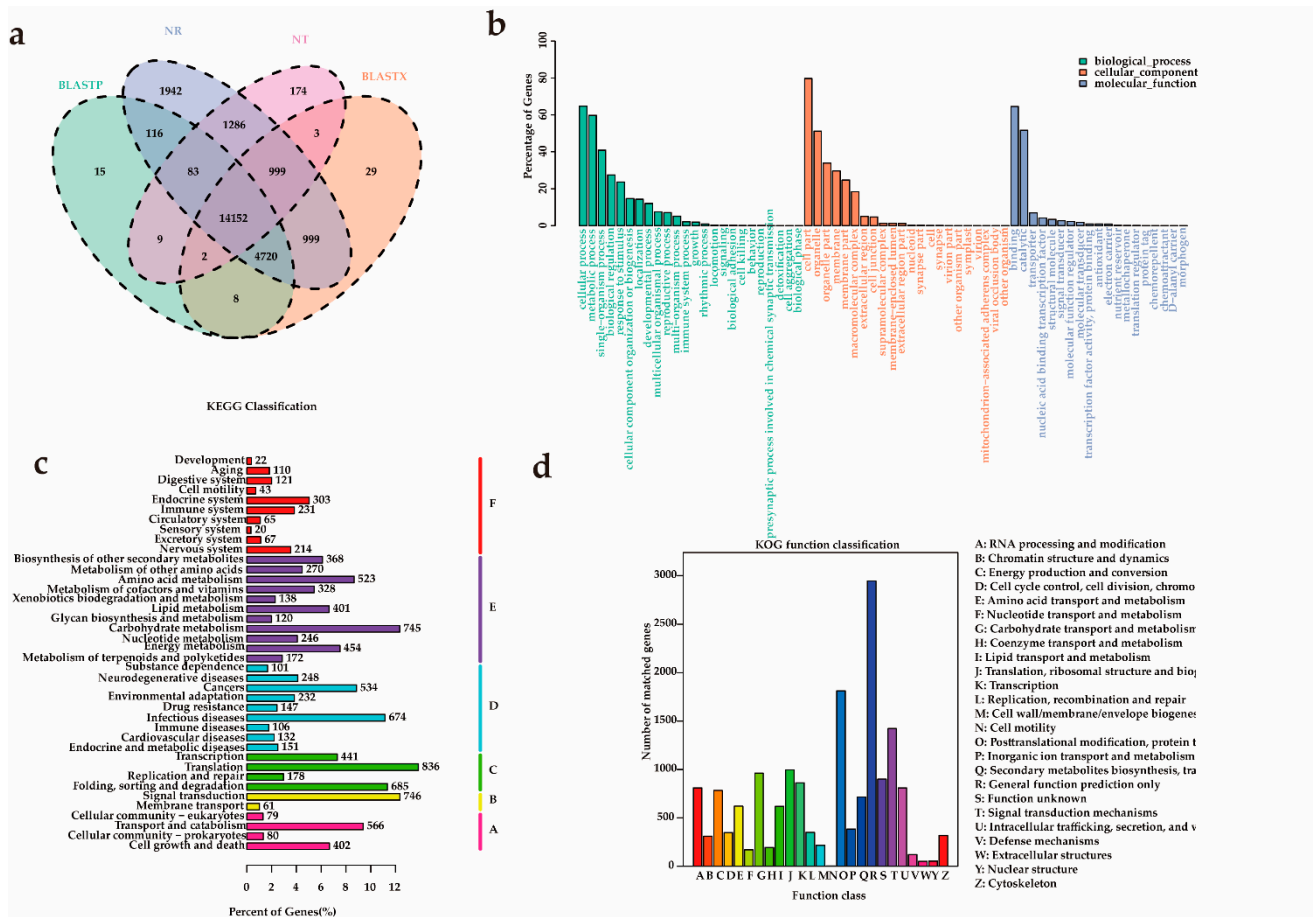

**Supplementary Figure S4.** Annotation and classification of genes in public databases in *A. gym-nandrum* (a) Comparison of annotation results in NT, NR, blasts, and blast databases venn diagram; (b) Functional annotation of genes based on GO categorization, The main functional categories within the biological process, cellular component and molecular function categories; (c) KEGG annotation classification statistical chart. A: Cellular Processes, B: Environmental Information Processing, C: Genetic Information Processing, D: Human Diseases, E: Metabolism, F: Organismal Systems (d) statistical chart of KOG, t the abscissa is the category in the KOG database, and the ordinate is the number of matched genes. the number of matched genes.

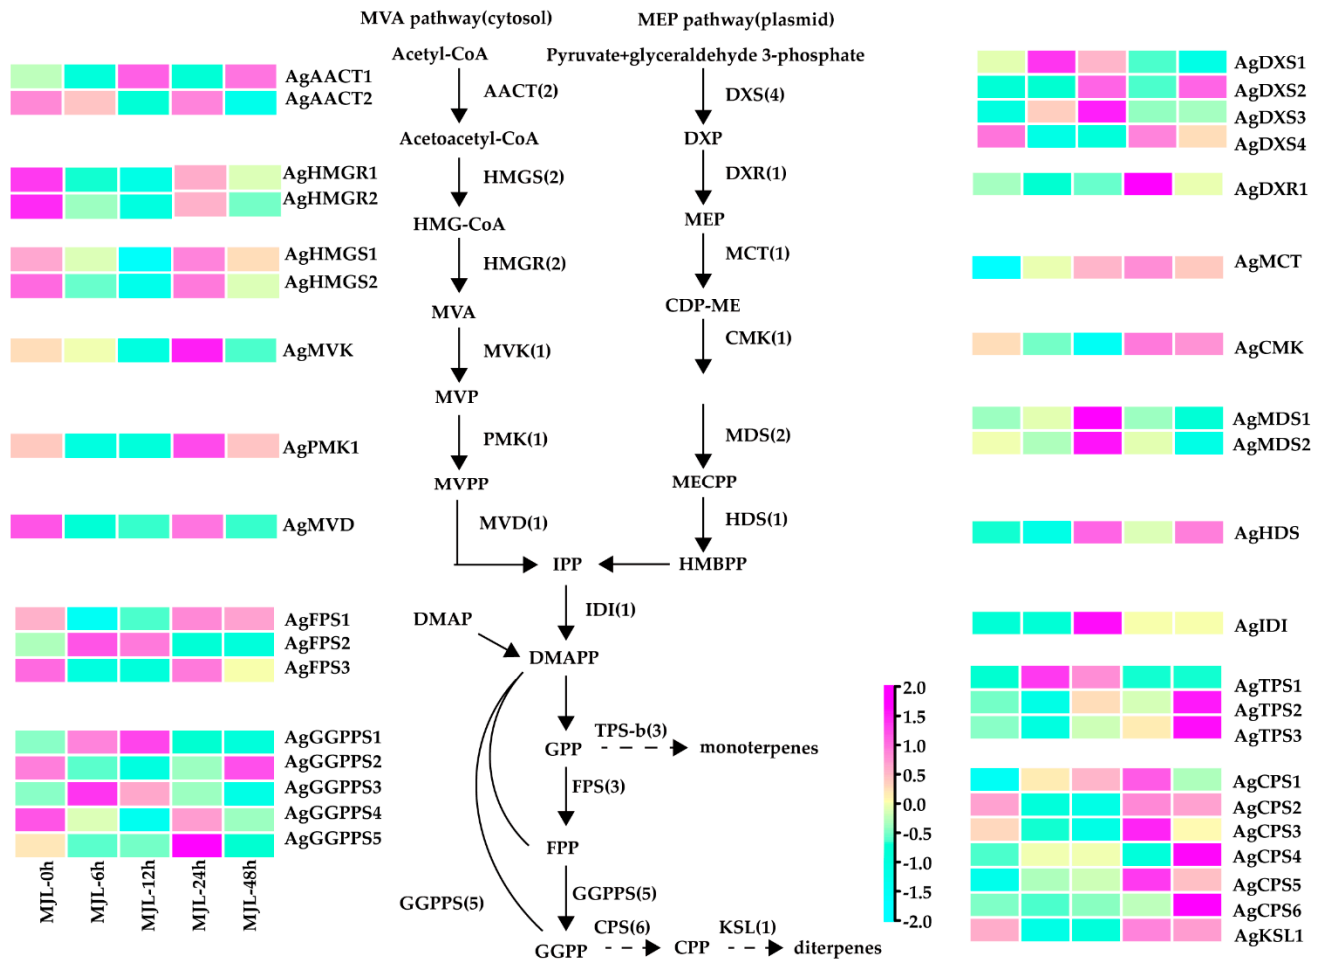

**Supplementary Figure S5.** The expression profile for the genes involved in terpenoid biosynthesis in the aerial portions of *A. gymnandrum*. The expression of each identified gene is represented as the FPKM after Log2 standardization of *A. gymnandrum* transcriptomes. Abbreviations: AACT, aceto-acetyl-CoA thiolase; CMK, 4-(cytidine 50 -diphospho)-2-C-methyl-D-erythritol kinase; DXS, 1-deoxy-D-xylulose 5-phosphate synthase; DXR, 1-deoxy-D-xylulose-5-phosphate reductoisomerase; FPS, Farnesyl pyrophosphate synthase; HDR, (E)-4-hydroxy-3-methylbut-2-enyl diphosphate reductase; HDS, (E)-4-hydroxy-3-methylbut-2-enyl diphosphate synthase; HMGS, 3-hydroxy-3-methylglutaryl-CoA synthase; HMGR, 3-hydroxy-3-methylglutaryl-CoA reductase; GGPPS, Geranylgeranyl pyrophosphate synthase; MCT, 2-C-methyl-D-erythritol 4-phosphate cytidyltransferase; IDI, Isopentenyl diphosphate isomerase; MDS, 2-C-methyl-D-erythritol 2,4-cyclodiphosphate synthase; MDD, Mevalonate diphosphate decarboxylase; MVK, mevalonate kinase; PMK, phosphomevalonate kinase; TPS, terpene synthases (including monoterpene syn-thases and sesquiterpene synthases); CPS, copalyl diphosphate synthase; KSL, Kaurene synthase.

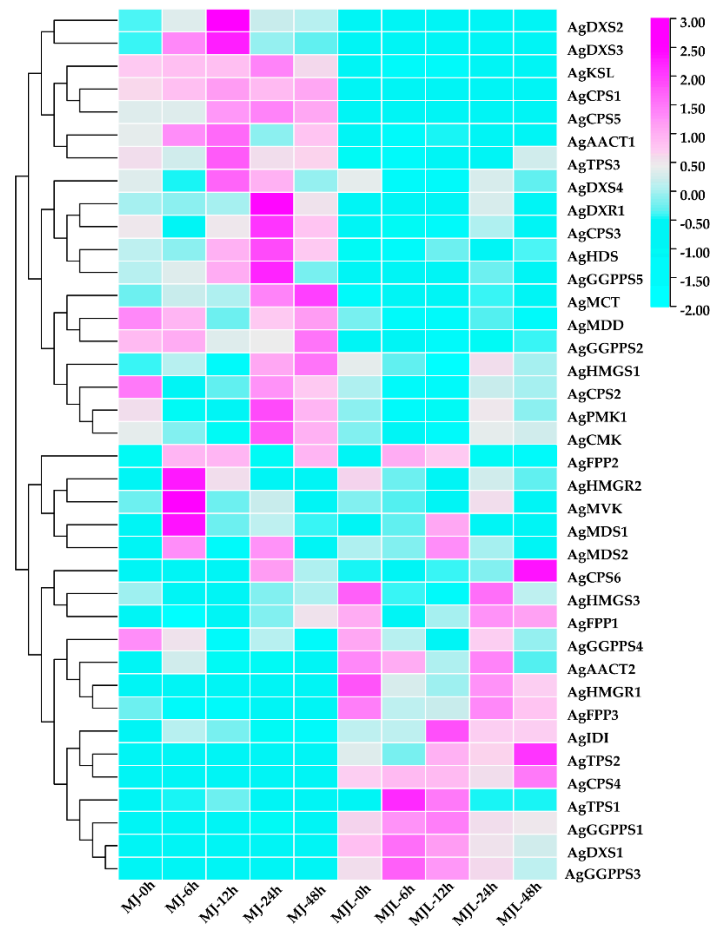

**Supplementary Figure S6.** Heat map of MVP pathways, MEP pathways, and terpene synthase gene average FPKM (row scale) in roots and aerial portions of *A. gymnanthum*.

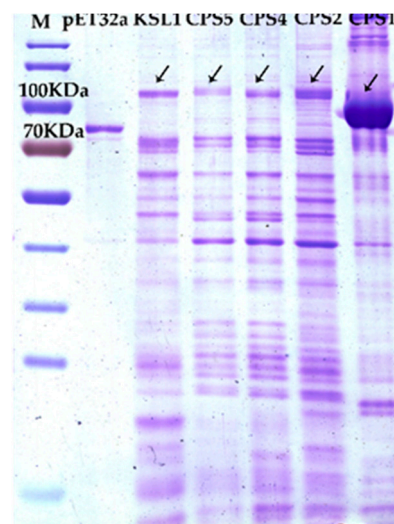

**Supplementary Figure S7.** SDS-PAGE electrophoresis of AgKSL and AgCPSs crude proteins (M: marker).



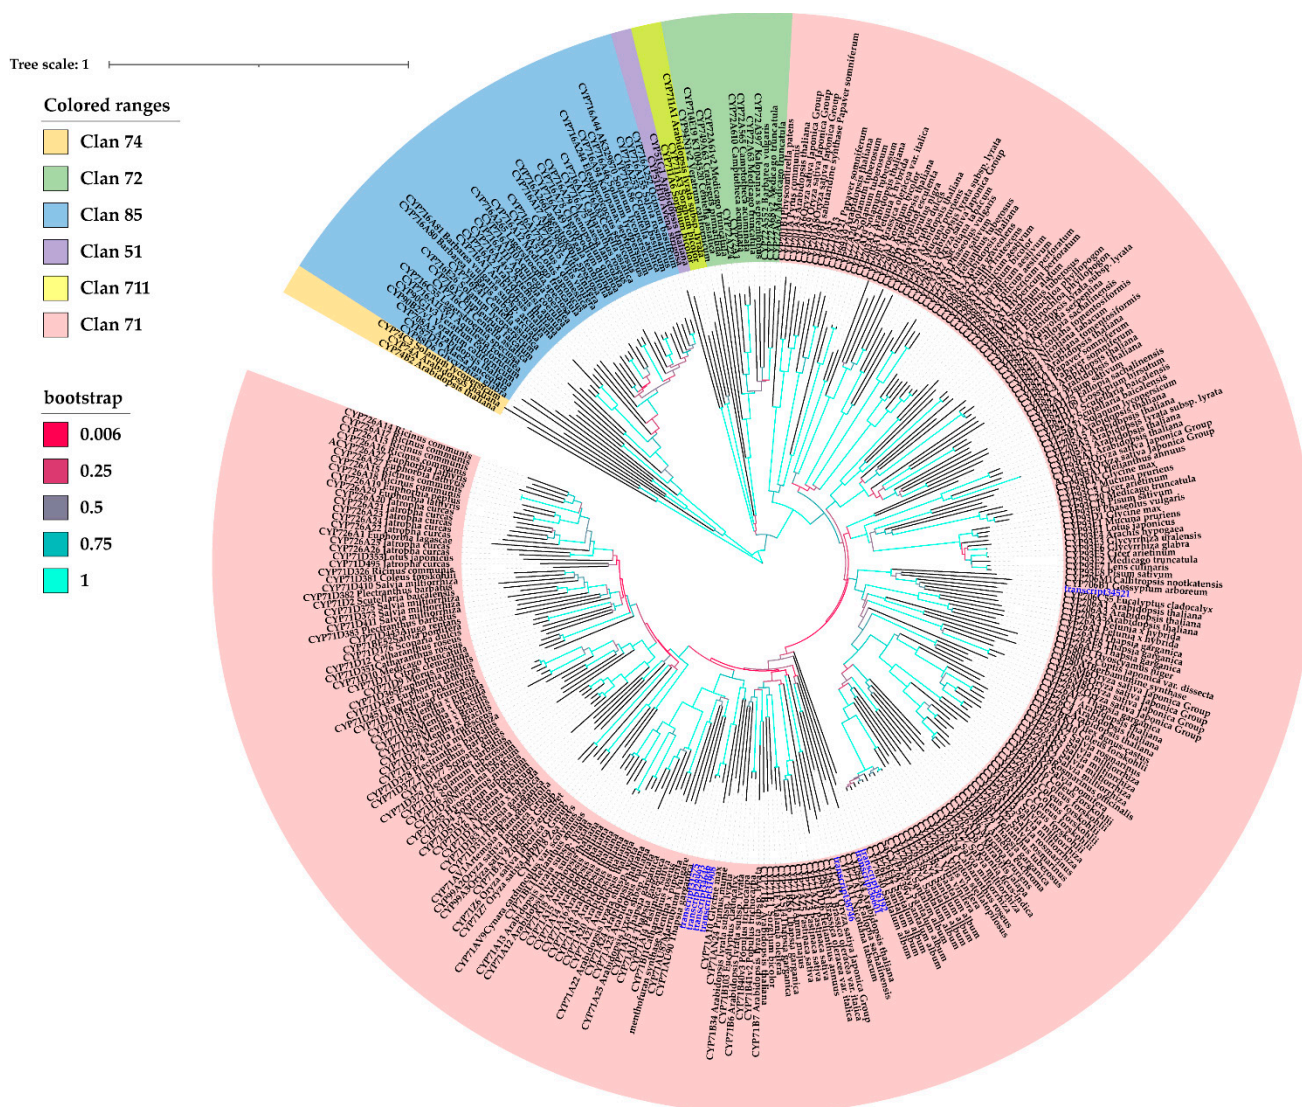

**Supplementary Figure S8.** Phylogenetic analysis of CYP450 in the *A. gymnamdrium*. The blue words indicate the CYP450 genes screened by WGCNA analysis. All sequences were downloaded from NCBI or Unipro.

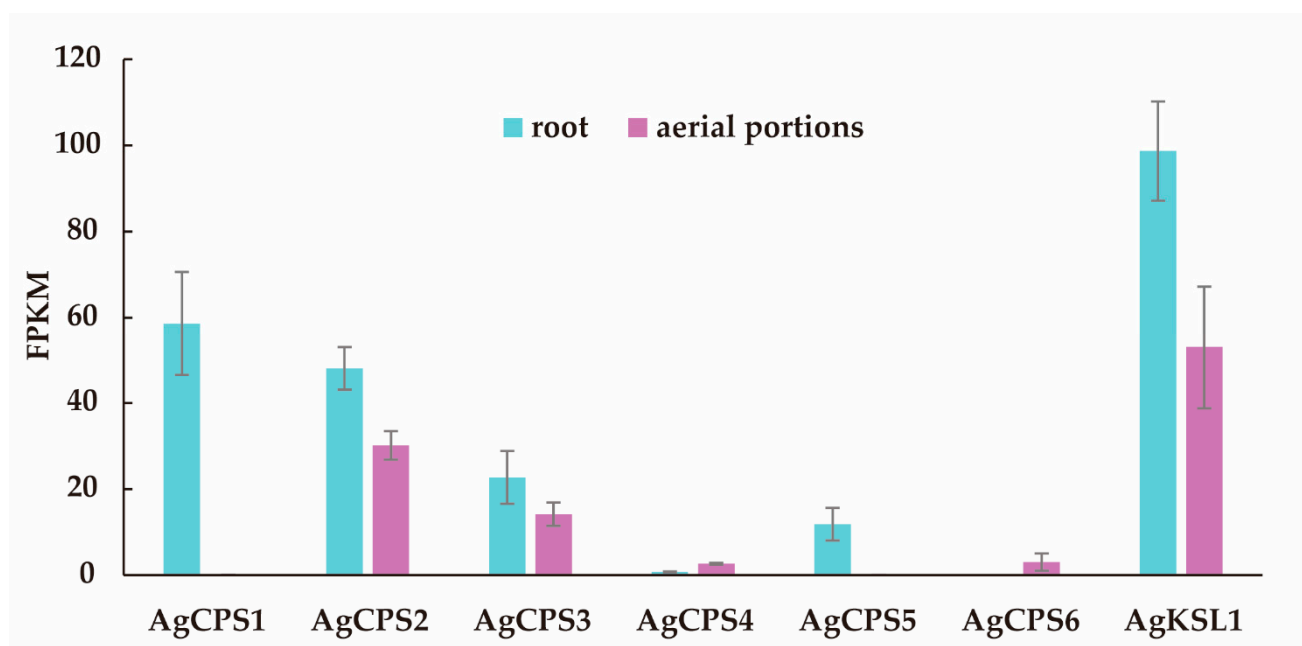



**Supplementary Figure S9.** The expression level of diterpene synthase genes in root and aerial portions of *A. gymnantrum*.

**Supplementary Table S7.** Primer sequences of AgCPS and AgKSL genes used in functional identification.

| Genes          | Primer sequences                                  |
|----------------|---------------------------------------------------|
| AgCPS1-BamH1-F | gccatggctgatatcggatccATGGCTTCTCTCTACACCTCCCTC     |
| AgCPS1-Sal1-R  | gcaagcttgctgacggatccTTAAGCTACTCTCTTAAAGAGGACATCAG |
| AgCPS2-BamH1-F | ggccatggctgatatcggatccATGTCTTCTCTCTCTTCTTCCCTC    |
| AgCPS2-Sal1-R  | cggccgcaagcttgctgacTTAGCCTACTCTCTTAAATAAAACTTCAG  |
| AgCPS3-BamH1-F | ggccatggctgatatcggatccATGTCTTCTCTCTCTTCTACTCTCAG  |
| AgCPS3-Sal1-R  | gccgcaagcttgctgacTTAGTTCACTCTCTTAAACAACACTTGAG    |
| AgCPS4-BamH1-F | ggccatggctgatatcggatccATGTCTTCTCTCTCTTCTACTCTCAG  |
| AgCPS4-Sal1-R  | ggccgcaagcttgctgacTCAGTTCATTCTCTTAAACAACACTTCG    |
| AgCPS5-BamH1-F | ggccatggctgatatcggatccATGTCTTTTGTGCTTAATCTTCTCCC  |
| AgCPS5-Sal1-R  | ggccgcaagcttgctgacTCAAATAACTGGATCAAATAGAACTTTGCC  |
| AgKSL1-BamH1-F | ggccatggctgatatcggatccATGTATCTCTCTCACCCAAACAAGTC  |
| AgKSL1-Sal1-R  | gccgcaagcttgctgacCTAGCCTTCAGTTAAATCTGGTCTAGTG     |
