# Supplementary material for: Integrating Metabolomics and Transcriptomics to Unveil Atisine Biosynthesis in Aconitum gymnandrum Maxim
Source: Int J Mol Sci. 2022 Nov 3;23(21):13463. doi: 10.3390/ijms232113463 (PMC9655601; doi:10.3390/ijms232113463)
Supplement: Supplementary file 1 [file ijms-23-13463-s001.zip]

Archive with 7 entries (7 files):
- ijms-1957265-Supplementary.pdf
- Supplementary Table S1.xlsx
- Supplementary Table S2.xlsx
- Supplementary Table S3.xlsx
- Supplementary Table S4.xlsx
- Supplementary Table S5.xlsx
- Supplementary Table S6.xlsx
