# Supplementary material for: Integrating Metabolomics and Transcriptomics to Unveil Atisine Biosynthesis in Aconitum gymnandrum Maxim
Source: Int J Mol Sci. 2022 Nov 3;23(21):13463. doi: 10.3390/ijms232113463 (PMC9655601; doi:10.3390/ijms232113463)
Supplement: Supplementary file 1 [file ijms-23-13463-s001.zip › Supplementary Table S1.xlsx]

## Sheet: Sheet1
Supplement Table S1. The mass spectrometry data, identification of chemical constituents and relative content from Aconitum gymnodendrum maxim.
No.	Rt（min）	Measured（m/z）	Theoretical（m/z）	Formula	Error(ppm)	Compound	Type	MS (m/z)	MJ-0d-1	MJ-0d-2	MJ-0d-3	MJ-12h-1	MJ-12h-2	MJ-12h-3	MJ-2d-1	MJ-2d-2	MJ-2d-3	MJ-3d-1	MJ-3d-2	MJ-3d-3	MJ-6d-1	MJ-6d-2	MJ-6d-3	MJ-9d-1	MJ-9d-2	MJ-9d-3	CK-2d-1	CK-2d-2	CK-2d-3	CK-3d-1	CK-3d-2	CK-3d-3	CK-6d-1	CK-6d-2	CK-6d-3	CK-9d-1	CK-9d-2	CK-9d-3	MJL-0h-1	MJL-0h-2	MJL-0h-3	CKL-2d-1	CKL-2d-2	CKL-2d-3	CKL-3d-1	CKL-3d-2	CKL-3d-3	CKL-6d-2	CKL-6d-3
1	2	408.275	408.275	C23H37NO5	0.245098	Isotalatizidine	C19-DAs	360.2542;316.2266	0.0314826	0.0826434	0.0830393	0.0236906	0.00301945	0.0281978	0.0364459	0	0.00240463	0.00267687	0.00317758	0.00402592	0.0150616	0.00128476	0.0509073	0.00771772	0.00884061	0.00369908	0.00756403	0.0182246	0.00799707	0.0454263	0.178792	0.102482	0.0812874	0.0372842	0.0970282	0.0186285	0.0730682	0.00761315	0.00144205	0.0674737	0.00658094	0.0177284	0.0017598	0.000958856	0	0	0	0	8.43866e-05
2	2.95	358.238	358.238	C23H37NO5	0.27933		C20-DAs	342.2439;328.2657;300.1594;282.2221	0.504194	0.702633	0.484568	0.00507299	0.0302096	0.0167633	0.000747578	0.0932009	0.0153818	0.00915491	0.829059	0.0304909	0.0065249	0.0702302	0.0351167	1.21104	0.675137	3.16947	0.00776292	0.149959	1.04125	0.0619619	0.0070202	0.16161	0.123639	0.528438	0.0429854	0.0975363	0.0154288	0.114776	0.44661	0.580606	0.561305	0.612928	0.312145	1.12411	0.277189	0.737187	0.410025	1.10938	0.455456
3	3.17	476.302	476.301	C27H41NO6	1.68067		C19-DAs	420.2717;328.2639;300.2329;	0.175585	0.268231	0.731742	0.259559	0.526889	0.362808	0.252463	0.254629	0.357456	0.441336	0.141876	0.189482	0.613684	0.511811	1.29248	0.381664	0.35401	0.268113	0.0850341	0.326315	0.0823093	0.619839	1.81507	0.519557	0.531285	0.150321	0.273552	0.448669	0.504141	0.461051	0.0715562	0.0580509	0.0157786	0.000653928	0.00939495	0.015872	0.0217866	0.0137462	0.0093585	0.00417093	0.0247832
4	3.21	420.275	420.275	C24H37NO5	0.47619		C19-DAs	360.2759;328.1560	0.119499	0.12637	0.0668258	0.0240815	0.0450038	0.00831897	0.0893712	0.148596	0.0940923	0.0747035	0.095164	0.0219744	0.255623	0.163786	0.867496	0.283138	0.232759	0.33665	0.0439792	0.0815211	0.231474	0.0642486	0.247637	0.214003	0.188891	0.0686086	0.144037	0.113441	0.182529	0.112605	0	0	0.00110613	0	0	0	0	0	0.00026396	0	0
5	3.3	450.288	450.285	C25H39NO6	5.55556		C19-DAs	432.2778;342.1710	0.68356	1.27677	0.796987	0.152152	0.18902	0.163209	0.744779	0.366857	0.237851	0.773451	0.406704	0.267181	1.86246	0.457923	3.63828	0.713791	0.454735	0.504525	0.427471	0.274921	1.10467	0.73609	1.07839	0.915704	0.784485	0.381088	0.536374	0.580102	1.12437	1.83679	0.417058	0.292737	0.287696	0.819798	0.0646871	0.0275894	0.00051998	0	0.00308244	0.00396465	0.00304892
6	3.38	342.171	342.17	C20H24NO4+	1.75	Fuzitine	NAD	282.0898;265.0907	7.27099	7.24015	2.5154	1.17616	0.479625	2.20772	4.29063	2.79166	2.40103	2.35492	4.94016	8.37483	6.48192	9.10061	6.02949	8.80599	6.63211	7.09626	1.7836	2.1881	1.5414	17.2379	13.3538	7.18709	7.64566	8.37173	5.73576	7.26482	8.20997	7.23359	3.82319	9.17251	1.49954	0.764085	0.535349	0.0908739	0.0345393	0.0696586	5.03656	0.0595582	0.175611
7	3.59	344.26	344.259	C22H33NO2	1.76134	Atisine	C20-DAs	326.2505;300.1972;282.1861	17.5478	23.6166	19.1217	22.2079	6.54616	18.6068	51.1015	35.1214	27.8818	64.7095	37.8545	50.5629	46.3188	85.5151	42.0063	35.4481	41.8309	25.6547	7.81423	19.5323	15.427	33.8766	30.7068	34.3215	29.8941	23.4336	20.6545	29.1028	29.4665	25.1184	19.8106	6.66812	5.81003	2.17493	2.62078	1.99591	5.3243	2.52599	6.59333	4.16134	2.91574
8	3.86	328.191	328.191	C20H25NO3	0	Hetisinone	C20-DAs	282.223	0.107286	0.195277	0.0556952	0.0658	0.0827297	0.0985096	0.0794795	0.116245	0.117937	0.0698263	0.143397	0.207593	0.494987	0.053678	0.597158	0.0341827	0.0342064	1.57607	0.0145775	0.0486281	0.488914	0.0654742	0.258403	0.0832131	0.00763594	0.167837	0.0779484	0.00555076	0.141033	0.0712966	1.14733	0.680458	0.572434	5.26283	1.26913	0.576641	0.937839	0.258858	0.37918	0.0672269	0.0607055
9	3.92	360.254	360.254	C22H33NO3	0.415		C20-DAs	344.2603,326.2499,298.2172	1.25799	1.11348	0.847345	0.531204	0.287191	0.474168	3.57966	1.81018	1.40329	1.24413	1.28687	2.25213	2.17638	3.73984	2.62985	1.47672	1.67492	1.17686	0.644691	1.46902	1.08088	1.33279	2.23029	1.57482	1.81857	2.01263	0.672118	1.28055	1.18661	1.79408	0.17489	0.267312	0.0920079	0.040925	0.0501	0.017741	0.0387487	0.00512218	0.177557	0.00268933	0.00457816
10	4.07	424.226	424.228	C29H29NO2	-4.95283		C19-DAs	390.2626;360.2561;344.2589;330.2440;326.2506	0.299317	0.218182	0.132121	0.124435	0.0373781	0.0580372	0.66843	0.329537	0.294846	0.445874	0.275063	0.389325	0.661757	0.760351	0.507629	0.607168	0.584656	0.166839	0.121627	0.180927	0.194459	0.517117	0.196364	0.391572	0.350771	0.288941	0.128222	0.23113	0.445081	0.535799	0.0827129	0.0135024	0.00880581	0.00225308	0.00596164	0.000798693	0.00924184	0.00255204	0.0133015	0.0113622	0.0058689
11	4.23	464.302	464.301	C26H41NO6	1.2931	14-acetyltalatisamine	C19-DAs	404.2829;372.2525;340.2284	0.980516	0.634188	0.450101	0.19401	0.212136	0.340542	0.292987	0.389141	0.249183	0.124448	0.369415	0.15775	0.196239	0.183491	0.565372	0.327515	0.340271	0.309244	0.360711	0.729684	0.905722	0.277506	1.15882	1.38144	0.284291	0.511181	0.409333	0.315236	1.57077	0.113448	1.1446	0.575029	0.83829	0.567904	0.251963	0.471556	0.175677	0.395752	1.21116	0.5901	0.363853
12	4.38	504.296	504.296	C28H41NO7	-0.99		C19-DAs	486.2848;358.2364;342.2429	0.242012	0.136823	0.255769	0.0354581	0.0582435	0.0763119	0.44766	0.257414	0.197368	0.437773	0.499811	0.382764	0.271131	0.205514	0.0760365	0.25611	0.202857	1.11654	0.0617056	0.307389	0.175022	0.171814	0.199735	0.401893	0.143437	0.530538	0.0623238	0.104343	0.0850154	0.0492543	0.34279	0.000113837	0.052779	0.00194098	0.324256	0.00194423	0.447459	0.0511666	0.294672	0.0195055	0.0195557
13	4.67	582.294	582.292	C29H43NO11	3.60825		C19-DAs	546.3106;514.2615;342.2437	1.49231	0.747311	1.39873	0.280304	0.209613	0.283944	0.519556	0.858164	0.677049	0.696619	0.415536	1.38651	1.11324	1.77057	0.585541	0.801839	0.772474	1.57104	0.843294	0.812231	1.44022	0.522057	0.657022	0.548041	0.642563	1.19778	0.446878	1.33599	0.717519	0.594166	0.00312215	0.000321763	0	0.000975937	0.000285942	0.00384285	0.00036241	0.000530604	0.00184192	0.000574243	0
14	4.87	474.287	474.286	C27H39NO6	1.89873		C19-DAs	434.2899;342.2426;326.2472;	1.87807	0.699901	3.12609	0.654474	1.88243	0.835385	0.663979	0.943775	0.938132	1.32303	0.588296	0.714534	1.12764	0.819922	1.7939	1.53926	1.23658	1.4635	0.430399	1.57883	0.226108	1.90723	6.68831	3.23053	0.833983	0.275197	1.07939	0.363553	2.58484	0.354022	0.0539214	0	0.0710797	0.0316709	0.0232897	0	0.0590999	0.0359629	0.0344879	0.410479	0.0351444
15	4.83	464.302	464.301	C26H41NO6	0.43	14-acetyltalatisamine	C19-DAs	432.2747;342.2434;314.2476	2.18934	1.51353	1.32197	0.615856	0.249963	0.224045	1.37016	0.730513	0.512459	2.71348	1.29007	0.969922	1.10737	0.784455	2.68283	2.16662	1.08031	1.69793	0.880092	2.17702	2.93738	1.59764	1.11096	2.26762	1.54571	0.857104	0.799972	1.02692	2.14322	1.41351	2.71563	2.78802	2.31488	4.9424	2.578	2.20361	0.743974	0.793968	2.0869	0.82213	1.04609
16	5.15	490.282	490.281	C27H39NO7	3.26531		C19-DAs	472.2656;408.3297;342.2412;324.2318	2.39542	0.967884	3.20409	0.789775	1.07568	1.04274	1.03381	1.26882	1.36471	1.97168	1.00966	1.24416	1.29533	1.42156	3.22541	2.44967	1.88601	2.13158	0.439113	1.38359	0.381986	2.37209	7.74285	4.07457	0.734327	0.720772	0.955826	0.934183	2.1337	0.688627	0.0846916	0.00727973	0.00419213	0.0127823	0.00656161	0.0169942	0.0251196	0.0264302	0.0709627	0	0.0171305
17	5.37	488.302	488.301	C28H41NO6	1.84426		C19-DAs	388.2494;358.0025;342.2422.326.2481;304.0824	1.78675	0.287466	0.845002	0.174026	0.376419	0.534273	0.387683	0.92579	1.03815	0.483326	0.831427	0.575222	0.41556	0.646092	0.486737	0.382301	0.375551	0.396084	0.838681	0.167703	0.698673	0.243538	0.705652	0.407151	0.588631	0.661488	0.755283	0.0892322	0.561299	0.227398	1.5012	0.634026	0.109919	0.253912	0.149777	0.214413	0.168098	0.132436	0.785593	0.102152	0.178398
18	5.72	358.238	358.238	C22H31NO3	0.27933		C20-DAs	342.2477;328.2647;314.2138;296.2430	0.312601	0.0863139	0.014001	0.0870491	0.0690015	0.0263784	2.52572	2.14974	1.27699	1.948	1.08776	1.19446	0.406088	2.74457	1.08161	0.231837	0.223364	1.08149	0.00272394	0.0273141	0.0281252	0.0708891	0.618413	0.106772	0.0714901	0.0262719	0.0129381	0.0444607	0.0899045	0.00346509	0.033763	0.00111513	0.0239485	0.000351734	0.00129727	0.00020153	0.0230314	0.021871	0.000336477	0.00565184	0.0781655
19	5.75	492.298	492.296	C27H41NO7	3.25203		C19-DAs	414.2641;382.2400;342.2404;314.2471	0.524508	0.220114	0.135194	0.01701	0.101006	0.0660359	0.137381	0.133938	0.107763	0.0726611	0.147239	0.0374019	0.14821	0.215413	0.5814	0.369127	0.391542	0.150258	0.152464	0.105007	0.38901	0.220262	0.573521	0.476757	0.205686	0.104172	0.19327	0.175152	0.842626	0.138848	0	0	0.0003567	0.00320425	0	0	0	0	0.000695192	0	0
20	5.8	504.297	504.296	C28H41NO7	1.98413		C19-DAs	486.2934;342.2430;326.2488;314.2099	1.95548	0.166041	0.688668	0.1729	0.179985	0.471622	0.614985	0.643704	0.549608	0.182483	0.887843	0.909061	0.329001	1.17622	0.420563	0.796042	0.896058	0.359984	0.587146	0.154533	0.415869	0.264707	0.534126	0.305656	0.208785	0.795377	0.406825	0.338206	0.612699	0.203777	0.00300794	0	0.000329677	0.0032201	0	0	0.000505724	0.00138509	0	0	0
21	6.03	516.298	516.296	C29H41NO7	2.32		C19-DAs	456.2821;342.2433;326.2480;298.21173	4.3104	1.24208	4.01139	0.864291	0.684578	1.40428	3.67972	3.51402	3.05368	7.36173	2.03473	2.36328	1.63611	4.21037	3.87034	3.5811	2.34075	1.26516	0.304781	1.68881	0.478809	3.47176	3.16374	2.56161	4.29876	1.16263	1.61331	2.68125	18.7245	1.82075	0.417944	0.0113058	0.0853495	0.0498877	0.0148018	0.00600876	0.0986754	0.0632076	0.00528307	3.47536	0.21361
22	6.08	416.28	416.28	C25H37NO4	0.240385		C19-DAs	342.2480;326.2485;298.2186	1.00353	0.75965	0.134029	0.0502041	0.0349567	0.0390676	0.483518	0.630467	0.4711	1.02315	1.45295	0.415461	0.723531	1.65134	1.51074	0.720252	0.562493	0.980474	0.0223357	0.18803	0.0982043	0.482232	1.00867	0.776437	0.222799	0.456883	0.228063	0.266712	0.634627	0.0519261	0.000927426	0	0.000732316	0	0	0	0.0147515	0.00340463	0.00447282	0.000978444	0.000504852
23	6.15	532.326	532.328	C30H45NO7	-2.25564		C19-DAs	516.2946;326.2481;298.2134;225.1669;177.0536;131.0860	0.984455	1.07697	0.305862	0.14658	0.214176	0.608536	0.733025	0.579371	0.720855	0.544546	0.84395	1.77657	2.58662	0.916179	1.60532	1.58398	1.43153	1.01474	0.13639	0.278895	0.635656	1.58444	1.35619	1.12078	0.545397	0.86683	0.700962	0.809266	1.00808	0.529449	0.199274	0.0338257	0.148213	0.035435	0.12472	0.0152112	0.0940857	0.0195609	0.314368	0.0113643	0.0361725
24	6.31	516.297	516.296	C29H41NO7	1.55		C19-DAs	456.2699;342.2428;326.2480;298.2167	1.21804	0.159337	1.72842	0.453112	0.285468	0.348044	1.02022	0.565277	0.482866	0.942115	0.564096	0.774756	0.35761	1.25283	0.892454	1.52769	1.3293	0.372897	0.644534	0.68805	0.524999	0.919964	1.27328	0.994885	0.228317	0.448606	0.543328	0.548811	2.3802	0.286901	0.665603	0.0612336	0.0747521	0.0621449	0.0170502	0.0193065	0.0469513	0.0793724	0.0765581	0.0235795	0.0130205
25	6.47	516.298	516.296	C29H41NO7	2.32558		C19-DAs	456.2745;326.2487;298.2169	1.75719	0.203172	2.7104	0.68943	0.439506	0.490749	1.53668	0.753702	0.663508	1.14588	0.831211	1.14239	0.496236	1.85511	1.27532	1.92059	1.70514	0.55438	1.05592	1.09127	0.823916	1.32831	1.886	1.51093	0.185201	0.674658	0.853806	0.591136	2.11752	0.359455	1.33937	0.0636625	0.089375	0.138897	0.0449812	0.0566807	0.0911706	0.128164	0.13741	0.0847211	0.0361417
26	6.57	532.294	532.291	C29H41NO8	4.51128		C19-DAs	500.1104;342.2430;326.2480;298.2179	1.64908	1.02806	1.31625	0.700179	0.190585	0.399101	1.84716	1.43358	1.59771	5.0837	2.89866	1.75651	1.37697	2.70912	2.48559	2.2486	1.50318	1.45698	0.139592	0.777867	0.27652	2.39639	1.93805	1.43425	1.26808	0.791982	0.532206	1.52189	4.98551	1.40317	0.019769	0.00114998	0.00267435	0.00746567	0.00141566	0.00453123	0.00441495	0.0130689	0.00835004	0.0105594	0.0100222
27	6.67	516.297	516.296	C29H41NO7	1.80329		C19-DAs	365.1064;326.2480;298.2185;284.2013	2.27057	1.809	1.54223	1.07505	1.03266	1.43738	3.50907	4.12661	4.73286	3.86578	3.36894	12.3712	13.3814	5.85436	9.83297	7.41626	6.89061	0.785174	0.340108	4.01314	1.33036	4.89728	5.98349	5.58628	9.18279	3.73267	2.41246	6.80876	4.40027	4.99624	0.0733932	0.0673646	0.0545535	0.175292	0.102136	0.0397321	0.231817	0.0874734	0.0405986	0.813691	0.262864
28	6.76	506.313	506.312	C28H43NO7	1.45474		C19-DAs	474.2848;446.2931;414.2655;382.2403;326.2128	7.46874	4.42639	3.0942	1.88311	0.967386	1.04476	2.9432	2.9906	1.62144	4.45317	4.39464	1.63225	4.53511	3.7714	13.7112	6.49005	5.37236	6.53652	1.90589	4.15062	6.47404	4.98535	4.29619	7.33721	3.75062	2.43812	2.48768	2.40603	6.94369	2.15173	1.68834	0.606158	0.735534	0.922882	0.278126	0.482804	0.47256	0.560906	1.34743	0.752046	0.89143
29	7.07	532.293	532.291	C29H41NO8	2.44361		C19-DAs	514.2743;342.2424;324.2312	0.255809	0.0227536	0.189706	0.15675	0.012937	0.0463895	0.354272	0.146048	0.166714	0.339859	0.322428	0.431769	0.263884	0.813979	0.228841	0.570925	0.544628	0.13764	0.0331885	0.135281	0.131839	0.44177	0.32972	0.320383	0.012189	0.118071	0.0844235	0.142226	0.388815	0.0675471	0.00252496	0	0	0.000405237	0	0.000796572	0.00122529	0	0	0	0.000226743
30	7.17	416.244	416.244	C24H33NO5	-0.744952		C20-DAs	342.2460;326.2485	0.600947	0.425602	0.237564	0.159585	0.111378	0.0359776	0.349066	0.298218	0.251642	0.33962	0.418428	0.203588	0.551661	0.256827	1.16279	0.47193	0.472644	0.60626	0.0270533	0.17991	0.161713	0.549256	0.426819	0.356248	0.263261	0.108366	0.220961	0.198097	0.42392	0.00220172	0.438118	0.28272	0.260161	0.0152524	0.123476	0.177888	0.134644	0.169229	0.30703	0.386331	0.279681
31	7.24	546.308	546.307	C30H43NO8	2.9304		C19-DAs	532.2957;486.2887;416.2433;358.2387;342.2426	1.73195	0.231814	0.299606	0.125725	0.133861	0.262287	0.563869	0.39173	0.460743	0.403828	1.00466	0.878588	0.443445	0.754491	0.325154	1.19743	1.15905	1.51497	0.296251	0.119309	0.535424	0.424968	0.660324	0.367939	0.118774	0.424123	0.472976	0.363549	0.884482	0.138577	1.49123	0.00112791	0.204921	1.07597	0.782795	0.35589	1.26533	0.44582	0.893757	0.0751917	0.715934
32	7.37	516.298	516.296	C29H41NO7	2.51938		C19-DAs	342.2429;262.2476;298.2165	0.608968	0.114148	0.350429	0.268883	0.13029	0.578283	2.78456	0.457588	0.412832	1.19178	2.19898	4.2914	3.12973	0.846228	1.79996	5.45152	5.74568	0.0429979	0.0279713	0.516113	1.65877	3.58798	2.91994	0.597385	0.710478	2.14879	0.159265	2.11749	1.60267	0.767338	0.00680571	0	0.00253113	0.0593796	0.00335004	0.00110523	0.000979184	0.000848775	0.00990092	0	0.000320669
33	7.56	532.293	532.291	C29H41NO8	2.81955		C19-DAs	514.2822;358.2368;342.2422;324.2320	0.501565	0.709322	0.971474	0.34622	0.152151	0.284683	2.52548	1.94351	2.12718	1.5908	2.6848	8.01804	8.95658	3.94591	5.68516	4.98133	4.34277	0.47945	0.0701654	1.2224	0.722574	4.37113	3.65559	1.67637	2.66894	2.03318	0.581855	4.35535	1.03382	2.27189	0.000963202	0	0.000526943	0.000938287	0.00035216	0.000365935	0.00803906	0.00170422	0.00824465	0.00840806	0.00545944
34	7.74	560.324	560.322	C31H45NO8	3.21429		C19-DAs	532.2895;500.3070;342.2426;328.2642	0.244892	1.70779	0.229268	0.132273	0.0556377	0.111341	0.0972462	0.330523	0.674977	0.17802	0.267165	0.424158	1.32468	0.718593	0.582569	1.19209	0.829907	0.67016	0.0397295	0.801685	0.226394	0.464933	1.51955	0.395679	0.775203	0.206733	0.323504	1.25131	0.118229	0.379779	0.0711944	0.144761	0.256382	0.207103	0.24149	0.120124	0.200619	0.0344988	0.0134136	0.0937076	0.0954889
35	8.27	532.293	532.291	C29H41NO8	3.19549		C19-DAs	358.2384;342.2426;324.2326;	0.0174806	0.00111942	0.0108257	0.00889479	0.000219036	0.0286375	0.423137	0.0573804	0.0425902	0.271427	0.508616	0.929368	0.636263	0.0879125	0.292509	0.99647	0.976189	0.00367059	0	0.0388056	0.208764	0.984184	0.356319	0.0302091	0.0778999	0.260752	0	0.396141	0.137594	0.0354055	0	0	0	0	0	0	0	0	0	0	0
36	8.72	530.313	530.312	C30H43NO7	2.64151		C19-DAs	470.2997;326.2489;298.2156	3.27663	1.98067	1.497	0.647515	1.84038	2.29019	2.38823	2.32662	2.61079	1.89039	3.51377	3.432	2.1442	3.08744	1.82669	3.32885	3.22072	2.38161	2.11934	0.638223	2.24881	1.80291	3.93564	2.21413	1.36058	2.40425	3.34623	0.377111	2.7133	1.13664	3.3152	0.947	0.198444	0.629516	0.318269	0.345166	0.229106	0.364879	1.11297	0.215377	0.321029
37	9.09	574.302	574.302	C31H43NO9	1.05		C19-DAs	516.2828;470.2961;370.2382;326.248;298.2107	0.0164533	0.010146	0.00415818	0.00343529	0.00695139	0.00341475	0.118203	0.00435813	0.0161613	0.0280322	0.0489638	0.0666792	0.125168	0.00878127	0.0575445	0.00626535	0.00810061	0.00447361	0	0.00102915	0.0937949	0.013272	0.0427639	0.0103825	0.000825877	0.102211	0.00074752	0.0233077	0.0970778	0.106445	0.0315572	0.00128589	0.0110667	0.0106927	0.0615507	0.00710551	0.0330664	0.00390094	0.193144	0.0150857	0
38	9.51	318.099	318.098	C16H15NO6	5.03145		C20-DAs	286.0735;151.0411;136.0410	0.492588	0.503375	0.936684	0.122137	0.187352	0.590148	0.640016	0.577842	0.404815	1.37946	2.50059	2.29412	1.48914	2.42932	1.03468	1.80474	2.12288	1.62013	1.36855	3.46022	1.12348	0.776974	2.0425	0.997948	1.34618	0.615235	0.383946	0.880401	0.969963	0.804266	0	0	7.20606e-06	0	0	0	9.07902e-05	0	4.2543e-05	1.81193e-05	0
39	9.69	546.308	546.307	C30H43NO8	2.74725		C19-DAs	528.3022;486.2890;342.2466;326.2515	1.65856	0.555434	0.85332	0.344747	0.386397	0.667919	1.38832	0.909353	0.761991	0.796777	2.48314	2.01897	0.541183	1.72619	0.718365	2.33654	2.51743	1.09487	0.724048	0.298935	0.670727	0.895309	1.2222	0.734608	0.304944	1.15907	1.18109	0.588473	1.23718	0.376964	0.00137738	0.000278784	0.00421465	0.00064501	0.00272197	0.00500854	0.000363161	0.000482973	0.000876	0	0.0986949
40	9.78	602.299	602.297	C32H43NO10	3.66	N-deethyldeoxyaconitine	C19-DAs	574.3411;558.3102;546.3123;516.2994;440.2816;326.2484	0.319529	0.0579596	0.576926	0.0566955	0.161123	0.252629	0.558404	0.583605	0.36601	8.80829	0.678381	0.272254	0.202578	1.33258	0.231634	0.44499	0.292381	0.336054	1.28976	0.950164	0.584605	0.114206	0.31388	0.843926	0.0447633	0.214489	0.193569	0.302457	1.11265	0.112978	0	0	0	0	0	0	0.000184582	0	0	0	0
41	9.93	574.34	574.338	C32H47NO8	2.26481	benzoyldeoxyaconine	C19-DAs	546.3013;526.2932;440.2765;342.2425;326.2487;	0.708915	0.284394	0.177765	0.014512	0.0404134	0.0691568	0.345684	0.233826	0.579283	0.219769	0.44612	1.56648	2.21152	0.434134	1.27541	0.78818	0.677165	1.12874	0.00156404	0.0707568	0.558053	1.05734	0.622086	0.378199	0.0606678	0.250842	0.131788	0.271882	0.415873	0.0551145	0.0136596	0	0.0272813	0.000642038	0.000536768	0.00109038	0.009037	0.000381996	0.00938751	0.00308238	0.00114692
42	10.04	574.311	574.311	C42H39NO	0.348432		C19-DAs	558.3098;342.2432;326.2463	0.167864	0.369247	0.324248	0.0545642	0.035588	0.046237	0.13082	0.244623	0.35661	0.127379	0.289395	0.634761	0.817249	0.284528	0.431242	0.806688	0.592778	0.376376	0.00926649	0.204458	0.198927	0.384861	0.663274	0.319679	0.11983	0.163724	0.106297	0.374845	0.130023	0.106572	0.0092261	0.00636207	0.00826355	0.000889738	0.00144777	0.0330211	0.0101993	0.00935748	0.0098023	0.000816067	0.00309148
43	10.11	558.308	558.307	C31H43NO8	2.15		C19-DAs	498.2876;426.2646;358.2340;342.2423;326.2483;298.2184	2.76902	0.284124	1.66256	1.10573	0.453457	0.646158	3.10899	1.05496	1.52371	5.94475	2.05464	3.79914	2.72329	2.06	2.47305	3.24173	3.36707	0.583931	0.455503	1.37049	2.63708	2.44908	3.04065	2.15145	0.555419	1.80148	1.26472	1.43454	2.37737	0.775386	0.130314	0.00727973	0.0350485	0.035856	0.0562222	0.0343481	0.0932108	0.0514333	0.316084	0.0419149	0.00784281
44	10.24	574.303	574.302	C31H43NO9	3.66		C19-DAs	514.2836;342.2418	0.279359	0.365062	0.167433	0.0811525	0.152368	0.0901514	0.118747	0.170608	0.541819	0.163603	0.488857	0.705497	0.777399	0.202401	0.57665	0.308452	0.243651	0.644992	0.0430278	0.227692	0.384929	0.437401	0.6868	0.558664	0.840241	0.126175	0.300004	0.273252	0.303637	0.0723394	1.9408	0.999898	2.82473	4.7849	1.64225	3.96226	5.33283	1.83477	0.299989	0.813455	2.11804
45	10.48	558.309	558.307	C31H43NO8	3.58423		C19-DAs	498.2852;438.2622;342.2424;326.2483;298.2170	4.16206	12.8799	5.58739	2.35123	3.30849	3.86654	3.54401	10.7137	16.1497	7.81126	8.62311	7.30449	8.97994	6.8637	8.29487	13.8857	9.8621	6.651	2.11822	10.6909	4.15381	5.89865	15.1367	11.2281	8.66162	4.8792	6.01119	6.01556	3.14753	5.00847	1.63869	0.395981	1.62676	1.99201	0.924262	0.329866	2.44356	0.952427	0.166936	0.830315	1.00226
46	10.83	574.304	574.302	C31H43NO9	3.3101	hemsleyasine/ isohemsleyanisine	C19-DAs	342.2435;298.2524	0.252231	0.0270998	0.112756	0.117866	0.0173715	0.0363334	0.791228	0.220021	0.304627	0.718987	0.441289	0.996557	0.703935	0.398173	0.463207	0.715984	0.687656	0.191531	0.00335242	0.215789	0.441714	0.707694	0.497845	0.194133	0.0449956	0.211472	0.0653303	0.217828	0.237433	0.0441969	0.0320154	0	0	0.000474593	0	0.0184612	0.000288128	0	0	0.00216038	0.000205463
47	11.21	574.304	574.302	C31H43NO9	3.65854	hemsleyasine/ isohemsleyanisine	C19-DAs	556.2921;528.2903;514.2846;342.2430;312.2709	1.24493	6.13247	2.36322	1.06244	0.650962	0.593917	2.28435	4.23099	5.70674	2.0688	6.22356	4.81875	4.57892	3.73574	3.93466	6.19338	4.49584	5.00568	0.474825	3.98986	1.60553	2.83999	8.2305	3.77653	1.97948	2.29299	1.35547	4.0278	0.923055	1.80054	0.0353206	0.00259385	0.0379417	0.0136156	0.015486	0.00502233	0.0137476	0.0219319	0.0596685	0.00409357	0.0321315
48	11.36	558.309	558.307	C31H43NO8	3.04659		C19-DAs	498.2838;438.2747;342.2450;326.2481	0.819673	0.0781931	0.512486	0.352221	0.144782	0.192364	1.08777	0.318557	0.491608	1.8586	0.6209	1.09297	0.882563	0.693933	0.832252	2.02528	1.59922	0.330169	0.11495	0.429521	0.787492	0.799106	1.00574	0.622182	0.161503	0.588232	0.437401	0.635777	0.971483	0.273417	0.173407	0.0855261	0.0736586	0.0142338	0.00775254	0.00802087	0.026501	0.00869066	0.0910701	0.00257643	0.000634
49	11.63	572.325	572.322	C32H45NO8	3.84615	14-O-anisoylneoline	C19-DAs	512.2965;392.2278;370.2391;326.2478;298.2160	3.98643	1.12462	0.550393	0.229553	0.866334	0.52924	2.97064	2.2435	3.4664	2.65301	4.77586	3.88579	3.72152	2.81916	3.5446	4.80668	4.42411	4.42734	0.678048	0.60329	2.09555	3.44623	3.88082	2.28896	0.550903	1.31405	1.27228	0.635693	2.55471	0.376562	0.693529	0.339497	0.442108	0.539937	0.188697	0.611768	0.591484	0.328527	0.269624	0.254878	0.254711
50	12.42	588.32	588.317	C32H45NO9	4.08163	benzoyldeoxyaconitine or ludaconitine	C19-DAs	558.3093;528.2977;386.2302;342.2432;326.2486;298.2164	5.48116	0.488238	0.648951	0.146913	0.429528	0.400323	4.34522	1.86124	2.49654	1.89037	8.94939	5.22534	1.45228	3.81244	1.81166	6.57488	6.94198	4.69966	0.442166	0.294461	1.44511	2.03544	2.40021	1.12255	0.185682	1.323	1.87536	1.23112	1.35536	0.180032	0.00890549	0.00140205	0.0167802	0.000568719	0.000406338	0.00834756	0.000395425	0.0116742	0.00419919	0.000678081	0.000305259
51	13.2	612.354	612.354	C35H49NO8	0	Aconigymin	C19-DAs	580.3279;550.3231;516.2780	0	0	0	0	0	0	0.00143405	0	0.000632083	0	0	0.00446631	0.0013953	0	0	0.000650917	0	0.00100766	0	0	0	0	0	0	0	0.000393437	0	0	0	0.00375917	0.127787	0.000329894	2.15965	2.64699	1.85735	2.71064	1.07754	2.03887	1.28323	1.33525	3.18337
52	13.38	328.264	328.264	C22H33NO	-0.609756	Gymnandine	C20-DAs	284.1985 ;177.0532;131.0848	0.222004	0.980959	0.298659	0.528815	0.241696	0.213851	1.17867	0.441607	0.265397	0.312857	0.556926	0.467066	1.96838	1.48215	1.26975	1.54181	1.04899	0.609094	0.206098	0.613683	0.293201	0.765478	0.564292	0.798598	0.660572	0.28265	0.403579	1.04259	0.265523	0.723619	0	0	0.00128268	0	0	0	0	0	0.000387722	0.000284334	0
53	13.74	344.259	344.259	C22H33NO2	-0.581395		C20-DAs	326.2502;282.1832;177.0588;131.0858	0.869125	0.530558	0.599037	0.315725	0.188104	0.178297	0.778762	0.855459	0.310605	1.8105	1.52126	2.77886	1.71605	1.40834	1.53201	0.502345	0.565098	1.24871	0.286477	0.561059	0.118644	0.485174	0.864326	0.357646	0.523955	0.543033	0.145892	0.294879	0.435434	0.316782	0.0253831	0.00564653	0.00575044	0.0162362	0.00368514	0	0.00117652	0.000448679	0.0135509	0.000641145	0.00281558
54	13.86	572.324	572.322	C32H45NO8	3.32168	gymanaconitine	C19-DAs	512.3049;326.2475;298.2205	0.817842	0.192512	0.138518	0.0595851	0.222766	0.194983	0.685659	0.541569	0.755262	0.677659	0.911687	1.73922	1.10056	0.621944	1.15713	0.894064	0.940345	0.483323	0.108426	0.104067	0.466767	0.966856	0.901833	0.495429	0.169313	0.300078	0.213818	0.153277	0.272535	0.116086	0	0	0	0.000364614	0.000644122	0.00415257	0.00072257	0.0127507	0.00862463	0.00648463	0.000793234
55	14.09	612.354	612.354	C35H49NO8	0	Aconigymin	C19-DAs	580.3299;548.3010;326.2479;191.0713	0	0	0.0193527	0	0	0	0.00067832	0	0	0	0	0.0062244	0.00181713	0	0.000494407	0.000106013	9.41422e-05	0.00186508	0	0	0	0.000130988	0.000251161	0	0	0	0	0.00012391	0.000668754	0	0.033957	0.00324434	4.12991	3.98794	3.33988	5.2014	1.62138	3.21219	2.47099	2.25729	5.82527
56	14.24	300.233	300.233	C20H30NO	0.666667		C20-DAs	282.2183;173.1335;145.1016	19.4814	24.21	28.9834	10.9458	8.7782	7.78816	21.3423	19.2	8.80971	40.6131	34.6687	58.0622	38.8746	30.2353	22.3833	12.2799	13.8965	33.8155	11.0494	19.3232	4.65042	19.5876	24.5209	14.3114	18.3213	21.3751	5.64803	13.7823	15.5417	11.738	3.5025	1.46979	0.384832	0.253708	0.0965059	0.027198	0.083659	0.0432418	0.278491	0.0287637	0.0636047
57	14.63	588.32	588.317	C32H45NO9	3.7415	benzoyldeoxyaconitine	C19-DAs	528.2912;478.2282;342.2431;177.0515;131.0825	1.02432	0.0550688	0.100791	0.0145508	0.0827529	0.0640411	0.671235	0.357475	0.436836	0.382073	1.55489	1.40564	0.25628	0.583418	0.357539	0.662089	0.792714	0.469698	0.0502338	0.0119444	0.259731	0.315786	0.352507	0.209953	0.0031805	0.191345	0.240035	0.111166	0.0862716	0.00900422	0	0	0	0	0	3.92452e-05	0	0	0	0	0
58	14.85	600.319	600.317	C33H45NO9	2.83		C19-DAs	478.2266;409.0737;374.2680	1.76039	0.549223	0.757604	0.318127	0.42113	0.397391	2.58928	1.14379	1.22248	1.64099	0.950242	0.62672	0.447736	3.9078	0.640801	0.972992	0.701712	0.39462	0.516838	0.23337	0.981746	0.576979	0.467204	2.265	0.157945	0.531146	0.393656	0.254823	0.774372	0.141307	0.188551	0.0181302	0.0660003	0.0289848	0.0052523	0.00182013	0.0294933	0.096065	0.0749202	0.0237712	0.00593715
59	16.06	429.277	429.276	C25H36N2O4	3.9627		NAD	411.2612;338.2478;300.2342;282.2222	3.53135	2.04589	1.71257	1.06733	0.345732	0.468322	2.32586	2.18297	0.759637	6.89626	4.57487	7.28589	6.50794	8.06891	5.36784	1.25109	2.21409	4.18328	1.04762	2.98174	0.244224	2.1727	4.58477	1.23888	2.07307	1.29097	0.415729	1.19386	2.5429	0.925616	0.154079	0.0639901	0.0190573	0.0909078	0.0471563	0.00112326	0.00974531	0.00533747	0.0789009	0.00457722	0.0331837
60	16.83	568.327	568.328	C33H45NO7	-0.18		C19-DAs	536.2405;508.3099;476.281;448.2490;444.2544;326.2512	0.00100293	0.00175491	0	0	0	0	0	0	0	0	0	0	0	0	0.00207154	0	0	0.00137032	0	0.00263247	0	0	0.00118932	0	0	0	0	0	0.0156977	0	0.0619077	0	0.123708	0.679939	0.294146	0.366843	0.525815	0.68806	1.61576	0.409596	0.991815
61	17.14	614.37	614.37	C35H51NO8	0.33		C19-DAs	598.3370;552.3326;520.3157;	0	0.00114681	0	0.0135739	0.00734234	0.012273	0.000810724	0.00353609	0.00779174	0.0267902	0.000427194	0.0268083	0.0265863	0.00569286	0.00182848	0.213403	0.112723	0.0315795	0	0.0203624	0.00105245	0.0538251	0.008276	0.177203	0.000507631	0.00366539	0.0629083	0	0.00166059	0.00183799	0.900804	0.480962	0.825491	0.76808	0.186612	0.471458	0.175599	0.244043	0.413042	0.136216	0.134895
62	17.19	686.391	686.391	C38H55NO10	0		C19-DAs	654.3637;614.3683;552.3325;420.2910	0	0	0	1.68684e-05	0	0	0	0	0	0	0	0	0	0	0	0	0	6.47598e-05	0	0	0	0	0	0	0	0	0	0	0	0	0.130851	0.0146164	0.0140203	0.00609342	0.0305085	0.0297627	0.00013506	0.0161734	0.111823	0.0156398	3.9625e-05
63	17.4	314.248	314.249	C21H31NO	-0.955414		C20-DAs	282.2166;173.1334;145.1010;131.0859	5.38303	7.10377	8.17326	2.96182	2.4976	2.06641	5.65007	5.8406	2.22638	13.2971	11.6096	19.0208	10.6508	9.8938	6.93644	3.01898	3.47278	10.4	2.68074	5.28709	1.01331	5.28122	6.92242	3.97961	4.70049	4.95949	1.43055	2.23189	3.08836	2.13793	0.345888	0.0989008	0.0205499	0.0810375	0.023069	0.00170664	0.018726	0.00132032	0.0481742	0.00367334	0.0220843
64	17.52	274.275	274.275	C16H35NO2	-0.729927		NAD	256.263	0.475002	0.367585	0.458638	0.17744	0.203653	0.217418	0.376871	0.33174	0.369204	0.491089	0.436695	0.651565	0.537054	0.386927	0.550562	0.443476	0.44739	0.408228	0.455875	0.552401	0.508169	0.110319	0.122571	0.123392	0.102229	0.153627	0.142299	0.104532	0.154959	0.157614	0.145717	0.0515982	0.0424915	0.10112	0.0939976	0.0629419	0.0710219	0.0654757	0.0605223	0.0649871	0.04325
65	17.57	318.301	318.301	C18H39NO3	-0.943396		NAD	288.2900;274.2733	0.299556	0.220213	0.291727	0.122076	0.12374	0.120917	0.277103	0.220721	0.22904	0.368408	0.300779	0.441576	0.375659	0.249847	0.393015	0.342103	0.331183	0.254931	0.267756	0.328149	0.286167	0.102197	0.0656367	0.060455	0.08799	0.0882985	0.152757	0.0757869	0.158201	0.157992	0.140782	0.0512706	0.0347783	0.118906	0.105875	0.0454247	0.0763005	0.0532566	0.031128	0.0746056	0.0347328
66	17.67	314.248	314.249	C21H31NO	-0.636943		C20-DAs	282.2223;173.1321;145.1020	10.5769	14.9247	16.7881	6.29004	5.35061	4.53127	10.7887	10.5604	4.19682	23.7723	22.268	34.6951	20.1656	19.445	12.7006	6.1848	6.6755	20.3709	5.2371	10.6951	2.04158	11.4209	14.3453	8.06516	9.46042	9.82347	2.79471	4.39156	6.14198	4.12932	0.0207033	0.00567905	0.00484338	0.00116914	0.0127229	0.00371451	0.00834144	0.00842202	0.0616855	0.00364756	0.00165985
67	17.79	288.29	288.29	C17H37NO2	-0.694444		NAD	270.2782;228.1955	0.17829	0.0854264	0.153746	0.40339	0.115576	0.0908062	0.948564	0.16588	0.102587	0.933643	0.179184	0.127286	0.204016	0.103355	0.934777	0.472687	0.786805	0.0717487	0.0690659	0.080484	0.0545091	0.640861	0.20528	0.113332	0.141615	0.218504	0.722079	0.0754425	0.672399	0.52113	0.630155	0.153714	0.071549	0.267822	0.377311	0.122336	0.408158	0.142462	0.102957	0.375867	0.103258
68	17.82	332.113	332.114	C17H17NO6	-0.516867		C19-DAs	314.2474;300.0851;288.2894;228.1951	1.21655	0.891968	1.43979	0.187949	0.0525327	0.231902	0.462482	0.246864	0.0651029	0.864965	0.601252	0.799872	0.770936	0.813338	2.01837	0.592647	0.617483	0.966232	0.897203	0.476644	0.185692	2.71122	4.72455	0.770423	1.96611	0.948747	0.222628	1.02888	0.930479	0.460221	0.0606776	0.241748	0.0693404	0.116697	0.0723182	0.00268671	5.77756e-05	0.00148988	0.06932	0.0212268	0.0247561
69	18.08	316.322	316.322	C19H41NO2	-0.632911		NAD	272.2955;228.1945	0.11707	0.0475908	0.0586498	0.291235	0.0790154	0.0499916	0.665464	0.106464	0.0552556	0.647418	0.0961582	0.0672132	0.138443	0.0599996	0.676904	0.329337	0.585453	0.028629	0.0339872	0.0418254	0.0206791	0.479364	0.129523	0.0542366	0.0923342	0.13354	0.481665	0.0328635	0.474504	0.372477	0.628737	0.0731238	0.0363114	0.166789	0.21184	0.0408076	0.297747	0.0756639	0.0486151	0.250046	0.0819592
70	18.18	318.098	318.098	C16H15NO6	-0.756604		C20-DAs	286.0715;272.2961;228.0621	0.0682939	0.0581677	1.10879	0.0152644	0.0132138	0.143069	0.0422086	0.0461809	0.033614	1.77869	0.604271	0.640919	0.466529	0.317446	0.463008	0.381715	0.592126	0.765132	0.378889	0.843792	0.0747084	0.0917828	0.641933	0.0907745	0.483319	0.0545853	0.0340107	0.0651579	0.27036	0.171217	5.50401e-06	0.000470447	0	0.00669681	0.000212701	0	5.55246e-05	8.57349e-05	0	0	0
71	18.41	316.229	316.228	C20H29NO2	0		C20-DAs	298.2159; 280.2080;145.1006;131.0848	6.14899	3.27713	6.43703	0.667552	0.32587	0.651119	3.23991	2.31527	1.73386	4.65487	4.34803	11.5564	9.19394	5.87333	6.81873	7.26837	6.64257	5.55988	1.9026	3.35594	1.07802	4.85484	2.68034	2.76297	4.68048	3.46149	1.83544	5.58903	4.97945	6.54421	0.867842	0.0959643	0.0183214	0.00340538	0.00159626	0.00143192	0.0010077	0.0010936	0.00402322	0.00178615	0.00103098
72	18.61	346.129	346.129	C18H19NO6	-0.533815		C20-DAs	316.2302;282.1702	0.60688	0.435446	0.138901	0.0473599	0.0351552	0.096539	0.165958	0.0697033	0.0796595	0.998035	0.21708	0.249489	0.353562	0.174189	0.82148	0.553572	0.548647	0.293885	0.118811	0.0786462	0.0937902	0.690757	0.786168	0.408962	0.359204	0.41084	0.0915623	0.181235	0.351625	0.0578116	6.88001e-06	0.000338025	0	0	0	0	0	0	0.0027914	0	0
73	18.66	316.118	316.119	C17H17NO5	-0.872152		NAD	286.11	0.782263	0.940806	0.490858	0.0490145	0.065246	0.206093	0.14472	0.361663	0.294014	2.54544	0.882287	0.520984	0.516941	0.322425	1.81529	0.324244	0.558773	0.758591	0.168157	0.153686	0.108735	0.49145	2.02986	0.322261	0.482011	0.171	0.0667132	0.480108	1.12016	0.185863	0.0621857	0.0174879	0.0133609	0.0328321	0.011227	0	0.000592762	0.0318153	0.0271599	4.39045e-05	0.0819049
74	19.66	301.217	301.217	C20H28O2	-0.332226		NAD	283.2059;273.2214;255.2109;227.1789	0.204765	0.130585	0.151696	0.0492778	0.0297457	0.0170821	0.280871	0.204901	0.0622102	0.536408	0.391803	0.729271	0.640417	0.437026	0.373984	0.301281	0.379623	0.632276	0.0479331	0.225681	0.00110817	0.174638	0.242725	0.0240888	0.215464	0.229767	0.0118721	0.295413	0.450883	0.208966	0.0133458	0.000771301	0.00027383	0.000281387	0.000435434	5.19734e-05	0.000171076	7.71614e-05	3.96424e-05	0.000265518	0.000168039
75	20.41	621.272	621.273	C38H38NO7	-0.81		NAD	561.2507;533.2547;475.2128;447.2158;419.2222	0.0588489	0.0395923	0.0721093	0.0478352	0.0325547	0.0115623	0.00491323	0.135066	0.108986	0.127047	0.018488	0.0582979	0.10319	0.0208256	0.0103687	0.083521	0.15968	0.409515	0.180055	0.259291	0.048603	0.12066	0.0255741	0.0117684	0.0657499	0.115058	0.00202429	0.129287	0.317902	0.0371274	2.31253	1.47067	3.50477	2.76686	3.46187	4.57471	3.03354	5.04996	2.90017	5.06315	3.90134
76	20.59	593.277	593.278	C37H38NO6	-1.18		NAD	533.2556;460.2259;433.2373	0.0181963	0.029713	0.024923	0.035131	0.0253723	0.0200081	0.000808687	0.10466	0.0780513	0.0834087	0.0395207	0.0382792	0.0445981	0.00748155	0.00144455	0.057779	0.132924	0.239223	0.154151	0.114176	0.00433361	0.0610872	0.0185539	0.0114332	0.0341968	0.0368064	0.000825263	0.0826839	0.26588	0.00928088	2.25256	1.3091	3.83231	2.84054	4.60091	5.65599	5.88633	8.31095	3.75812	10.3934	4.50217
77	21.03	607.293	607.294	C38H40NO6	-0.49		NAD	547.2697;533.2532505.2245;461.2315;33.2374;417.2052	0.979985	0.945875	0.963	0.315279	0.322044	0.142662	0.0459444	1.04555	0.859544	1.12491	0.581656	0.806818	0.569432	0.223992	0.0775998	0.490586	0.9091	1.57756	1.1749	1.51481	0.356283	1.07702	0.44343	0.23653	0.43234	0.925739	0.077171	1.23573	2.11793	0.250421	17.3643	13.333	30.288	26.0584	30.6431	43.7815	25.3969	40.0128	28.236	30.6038	27.4196
[truncated: 19 more columns]
