# Supplementary material for: Integrating Metabolomics and Transcriptomics to Unveil Atisine Biosynthesis in Aconitum gymnandrum Maxim
Source: Int J Mol Sci. 2022 Nov 3;23(21):13463. doi: 10.3390/ijms232113463 (PMC9655601; doi:10.3390/ijms232113463)
Supplement: Supplementary file 1 [file ijms-23-13463-s001.zip › Supplementary Table S2.xlsx]

## Sheet: Sheet1
Supplementary Table S2. The number of differential genes (DEGs) based on different induction times in aerial portions and root
	root				different parts	aerial portions
Group	0h_ 6h	0h_12h	0h_24h	0h_48h	0h vs 0h	0h_6h	0h_12h	0h_24h	0h_48h
Up-regulated	601	496	258	231	1254	205	212	6	17
Down-regulated	384	305	143	151	2328	132	193	32	23
