# Supplementary material for: Integrating Metabolomics and Transcriptomics to Unveil Atisine Biosynthesis in Aconitum gymnandrum Maxim
Source: Int J Mol Sci. 2022 Nov 3;23(21):13463. doi: 10.3390/ijms232113463 (PMC9655601; doi:10.3390/ijms232113463)
Supplement: Supplementary file 1 [file ijms-23-13463-s001.zip › Supplementary Table S3.xlsx]

## Sheet: Sheet1
Supplemntary Table S3 DEGs in A. gymnandrum and their Functional Annotation
ID	NR_Description
LRWT_f3p0_666_transcript81784_g7	Zinc finger protein 706, partial [Cynara cardunculus var. scolymus]
LRWT_f3p0_657_transcript82243_g2	Zinc finger protein 706, partial [Cynara cardunculus var. scolymus]
LRWT_f4p0_675_transcript81100_g3	zinc finger family protein [Populus trichocarpa]
LRWT_f3p0_1359_transcript51173_g1	WD repeat-containing protein 48 [Morus notabilis]
LRWT_f3p0_1726_transcript38155_g7	vicilin [Pistacia vera]
LRWT_f3p0_3522_transcript7821_g4	vacuolar invertase 2, GIN2 [Vitis vinifera=grape berries, Sultana, berries, Peptide, 664 aa]
LRWT_f2p0_2266_transcript24618_g6	vacuolar invertase 2, GIN2 [Vitis vinifera=grape berries, Sultana, berries, Peptide, 664 aa]
LRWT_f17p0_1202_transcript54097_g1	unnamed protein product [Vitis vinifera]
LRWT_f3p0_932_transcript68373_g1	unnamed protein product [Vitis vinifera]
LRWT_f7p0_629_transcript82632_g2	unnamed protein product [Vitis vinifera]
LRWT_f3p0_1183_transcript58385_g7	unnamed protein product [Vitis vinifera]
LRWT_f4p0_1344_transcript50532_g1	unnamed protein product [Vitis vinifera]
LRWT_f2p0_1265_transcript55078_g9	unnamed protein product [Vitis vinifera]
LRWT_f2p0_2113_transcript27608_g4	unnamed protein product [Vitis vinifera]
LRWT_f7p0_2283_transcript23292_g1	unnamed protein product [Vitis vinifera]
LRWT_f2p0_528_transcript89199_g10	unnamed protein product [Vitis vinifera]
LRWT_f11p0_1264_transcript52593_g1	unnamed protein product [Vitis vinifera]
LRWT_f5p0_935_transcript68396_g2	unnamed protein product [Vitis vinifera]
LRWT_f2p0_2284_transcript24271_g2	unnamed protein product [Vitis vinifera]
LRWT_f11p0_1107_transcript59410_g1	unnamed protein product [Vitis vinifera]
LRWT_f7p0_1241_transcript55109_g2	unnamed protein product [Vitis vinifera]
LRWT_f17p0_1559_transcript42419_g1	unnamed protein product [Vitis vinifera]
LRWT_f43p0_1433_transcript45168_g1	unnamed protein product [Vitis vinifera]
LRWT_f8p0_1498_transcript45862_g2	unnamed protein product [Coffea canephora]
LRWT_f9p0_628_transcript82461_g3	unnamed protein product [Coffea canephora]
LRWT_f7p0_1299_transcript53618_g3	unnamed protein product [Coffea canephora]
LRWT_f36p0_741_transcript76313_g1	unnamed protein product [Coffea canephora]
LRWT_f2p0_1954_transcript31650_g3	unnamed protein product [Coffea canephora]
LRWT_f2p0_1761_transcript36907_g4	unnamed protein product [Coffea canephora]
LRWT_f5p0_1205_transcript57231_g1	unnamed protein product [Coffea canephora]
LRWT_f10p0_1010_transcript64314_g1	unnamed protein product [Coffea canephora]
LRWT_f4p0_1339_transcript49591_g1	unnamed protein product [Coffea canephora]
LRWT_f3p0_1440_transcript48311_g4	unnamed protein product [Coffea canephora]
LRWT_f2p0_1174_transcript58713_g4	unnamed protein product [Coffea canephora]
LRWT_f2p0_5561_transcript926_g1	unnamed protein product [Coffea canephora]
LRWT_f2p0_1149_transcript59626_g7	unnamed protein product [Coffea canephora]
LRWT_f15p0_3505_transcript7879_g1	unnamed protein product [Coffea canephora]
LRWT_f6p0_735_transcript76178_g2	unnamed protein product [Coffea canephora]
LRWT_f7p0_2050_transcript28092_g1	unnamed protein product [Coffea canephora]
LRWT_f2p0_1204_transcript57485_g7	unnamed protein product [Coffea canephora]
LRWT_f2p0_1003_transcript65796_g17	unnamed protein product [Coffea canephora]
LRWT_f6p0_804_transcript74464_g1	unnamed protein product [Coffea canephora]
LRWT_f38p0_1684_transcript37978_g1	unnamed protein product [Coffea canephora]
LRWT_f3p0_1581_transcript41851_g2	unnamed protein product [Coffea canephora]
LRWT_f3p0_1499_transcript46180_g7	unnamed protein product [Coffea canephora]
LRWT_f2p0_1359_transcript51259_g6	unknown [Lotus japonicus]
LRWT_f10p0_950_transcript66981_g2	unknown [Lotus japonicus]
LRWT_f4p0_932_transcript68535_g3	unknown [Lotus japonicus]
LRWT_f5p0_1433_transcript47893_g3	Uncharacterized protein TCM_046954 [Theobroma cacao]
LRWT_f3p0_1419_transcript49058_g5	Uncharacterized protein TCM_046332 [Theobroma cacao]
LRWT_f2p0_805_transcript74597_g10	Uncharacterized protein TCM_040942 [Theobroma cacao]
LRWT_f2p0_511_transcript90082_g10	Uncharacterized protein TCM_007226 [Theobroma cacao]
LRWT_f2p0_559_transcript87507_g5	uncharacterized protein LOC100500003 precursor [Glycine max]
LRWT_f10p0_657_transcript81066_g1	uncharacterized protein LOC100306218 [Glycine max]
LRWT_f3p0_2508_transcript20453_g4	uncharacterized protein LOC100260066 [Vitis vinifera]
LRWT_f3p0_911_transcript69656_g3	uncharacterized protein LOC100191965 [Zea mays]
LRWT_f5p0_1281_transcript53870_g2	Uncharacterized protein isoform 3 [Theobroma cacao]
LRWT_f7p0_1775_transcript36007_g5	UGP-glucose pyrophosphorylase [Actinidia eriantha]
LRWT_f5p0_1468_transcript45808_g1	UDP-glycosyltransferase 75D1-2-like protein [Fragaria x ananassa]
LRWT_f191p0_1510_transcript42576_g1	UDP-glycosyltransferase 75D1-2-like protein [Fragaria x ananassa]
LRWT_f6p0_1779_transcript35969_g2	UDP-glycosyltransferase 73B4, putative [Theobroma cacao]
LRWT_f2p0_2166_transcript26612_g9	UDP-glucosyltransferase, putative [Ricinus communis]
LRWT_f23p0_1673_transcript38918_g1	UDP-glucosyl transferase 85A2 [Theobroma cacao]
LRWT_f3p0_1799_transcript35722_g5	UDP-glucosyl transferase 85A2 [Theobroma cacao]
LRWT_f2p0_1693_transcript39346_g7	UDP-glucosyl transferase 85A2 [Theobroma cacao]
LRWT_f2p0_1604_transcript42402_g6	UDP-glucosyl transferase 85A2 [Theobroma cacao]
LRWT_f5p0_1731_transcript37918_g1	UDP-glucosyl transferase 85A2 [Theobroma cacao]
LRWT_f4p0_1557_transcript43804_g4	UDP-glucosyl transferase 85A2 [Theobroma cacao]
LRWT_f5p0_1813_transcript33633_g1	UDP-glucosyl transferase 85A2 [Theobroma cacao]
LRWT_f5p0_1453_transcript47518_g1	UDP-galactose/UDP-glucose transporter 4 [Morus notabilis]
LRWT_f2p0_1663_transcript40311_g6	Tubulin alpha chain [Morus notabilis]
LRWT_f28p0_2471_transcript18466_g1	transketolase [Camellia sinensis]
LRWT_f3p0_1950_transcript31483_g6	transcription factor TGA2 [Nelumbo nucifera]
LRWT_f2p0_2270_transcript25004_g9	transcription factor TGA2 [Nelumbo nucifera]
LRWT_f3p0_1898_transcript32844_g3	transcription factor TGA2 [Nelumbo nucifera]
LRWT_f2p0_1469_transcript47191_g6	transcription factor bHLH35-like [Glycine max]
LRWT_f6p0_988_transcript66166_g3	transcription factor [Medicago truncatula]
LRWT_f29p0_1645_transcript38952_g1	tonoplast metal tolerance protein [Sedum alfredii]
LRWT_f6p0_1662_transcript40219_g5	tonoplast metal tolerance protein [Sedum alfredii]
LRWT_f17p0_700_transcript77634_g1	Thiosulfate sulfurtransferase, chloroplastic -like protein [Gossypium arboreum]
LRWT_f862p0_540_transcript84504_g1	Thioredoxin H-type 1, H1,TRX1 [Theobroma cacao]
LRWT_f34p0_1141_transcript58138_g1	Sulfotransferase 2A [Theobroma cacao]
LRWT_f8p0_1710_transcript37064_g1	Sugar transport protein 14 [Morus notabilis]
LRWT_f2p0_3114_transcript12230_g4	sucrose synthase family protein [Populus trichocarpa]
LRWT_f4p0_486_transcript91138_g3	Subtilisin inhibitor 1, putative [Theobroma cacao]
LRWT_f2p0_1665_transcript40243_g9	squalane synthase 1 [Nigella sativa]
LRWT_f2p0_1002_transcript65660_g9	soluble inorganic pyrophosphatase [Medicago truncatula]
LRWT_f3p0_2836_transcript15786_g2	S-locus protein kinase [Populus trichocarpa]
LRWT_f5p0_1971_transcript30077_g3	Serine hydroxymethyltransferase 4 isoform 1 [Theobroma cacao]
LRWT_f3p0_1930_transcript29840_g2	Sequence-specific DNA binding transcription factors isoform 2 [Theobroma cacao]
LRWT_f2p0_1232_transcript55559_g2	secoisolariciresinol dehydrogenase [Dysosma versipellis]
LRWT_f2p0_1329_transcript53081_g22	SBP (S-ribonuclease-binding protein) family protein [Medicago truncatula]
LRWT_f3p0_1055_transcript63583_g3	SAUR family protein [Theobroma cacao]
LRWT_f5p0_1220_transcript56643_g4	Salicylate O-methyltransferase [Morus notabilis]
LRWT_f2p0_1330_transcript52376_g6	S-adenosyl-L-methionine:carboxyl methyltransferase family protein [Populus trichocarpa]
LRWT_f33p0_1386_transcript49077_g1	S-adenosyl-L-methionine:carboxyl methyltransferase family protein [Populus trichocarpa]
LRWT_f2p0_1448_transcript47928_g9	S-adenosyl-L-methionine:carboxyl methyltransferase family protein [Populus trichocarpa]
LRWT_f26p0_1338_transcript49814_g1	S-adenosyl-L-methionine:carboxyl methyltransferase family protein [Populus trichocarpa]
LRWT_f12p0_1894_transcript30929_g1	S-adenosyl-L-homocysteine hydrolase [Populus tomentosa]
LRWT_f2p0_689_transcript80805_g24	RNA-binding (RRM/RBD/RNP motif) family protein [Medicago truncatula]
LRWT_f7p0_869_transcript71231_g4	RNA-binding (RRM/RBD/RNP motif) family protein [Medicago truncatula]
LRWT_f4p0_1403_transcript49450_g1	RING/U-box superfamily protein, putative [Theobroma cacao]
LRWT_f5p0_1215_transcript57218_g3	RING/c3HC4/PHD zinc finger-like protein [Cucumis melo subsp. melo]
LRWT_f2p0_1447_transcript47972_g7	RecName: Full=Phosphoglucan phosphatase DSP4, amyloplastic; AltName: Full=Dual specificity protein phosphatase 4; Short=CsDSP4; Flags: Precursor
LRWT_f20p0_1206_transcript55605_g2	RecName: Full=Non-functional NADPH-dependent codeinone reductase 2
LRWT_f2p0_1280_transcript53770_g2	RecName: Full=Non-functional NADPH-dependent codeinone reductase 2
LRWT_f8p0_904_transcript69020_g1	RecName: Full=Eukaryotic translation initiation factor 5A; Short=eIF-5A [Senecio vernalis]
LRWT_f25p0_580_transcript85309_g1	RecName: Full=Defensin-like protein 2; AltName: Full=Cysteine-rich antifungal protein 2; Short=AFP2; Short=RAFP2; Flags: Precursor
LRWT_f3p0_1686_transcript39731_g7	RecName: Full=Cytochrome P450 71A1; AltName: Full=ARP-2; AltName: Full=CYPLXXIA1 [Persea americana]
LRWT_f3p0_1446_transcript48013_g1	RecName: Full=Crocetin glucosyltransferase, chloroplastic; AltName: Full=UDP-glucose glucosyltransferase 1; Short=GjUGT1; AltName: Full=UDP-glycosyltransferase 75L6; Flags: Precursor [Gardenia jasminoides]
LRWT_f5p0_1614_transcript41802_g1	RecName: Full=7-deoxyloganetin glucosyltransferase; AltName: Full=Genipin glucosyltransferase; AltName: Full=UDP-glucose glucosyltransferase 2; Short=GjUGT2; AltName: Full=UDP-glycosyltransferase 85A24 [Gardenia jasminoides]
LRWT_f6p0_1595_transcript42527_g1	RecName: Full=7-deoxyloganetin glucosyltransferase; AltName: Full=Genipin glucosyltransferase; AltName: Full=UDP-glucose glucosyltransferase 2; Short=GjUGT2; AltName: Full=UDP-glycosyltransferase 85A24 [Gardenia jasminoides]
LRWT_f4p0_1578_transcript43203_g2	RecName: Full=7-deoxyloganetin glucosyltransferase; AltName: Full=Genipin glucosyltransferase; AltName: Full=UDP-glucose glucosyltransferase 2; Short=GjUGT2; AltName: Full=UDP-glycosyltransferase 85A24 [Gardenia jasminoides]
LRWT_f6p0_1678_transcript39541_g4	RecName: Full=7-deoxyloganetin glucosyltransferase; AltName: Full=Genipin glucosyltransferase; AltName: Full=UDP-glucose glucosyltransferase 2; Short=GjUGT2; AltName: Full=UDP-glycosyltransferase 85A24 [Gardenia jasminoides]
LRWT_f2p0_1618_transcript41878_g6	RecName: Full=7-deoxyloganetin glucosyltransferase; AltName: Full=Genipin glucosyltransferase; AltName: Full=UDP-glucose glucosyltransferase 2; Short=GjUGT2; AltName: Full=UDP-glycosyltransferase 85A24 [Gardenia jasminoides]
LRWT_f3p0_924_transcript68947_g1	RecName: Full=(RS)-norcoclaurine 6-O-methyltransferase; AltName: Full=S-adenosyl-L-methionine:norcoclaurine 6-O-methyltransferase; Short=6-OMT
LRWT_f10p0_1205_transcript56893_g2	RecName: Full=(RS)-norcoclaurine 6-O-methyltransferase; AltName: Full=S-adenosyl-L-methionine:norcoclaurine 6-O-methyltransferase; Short=6-OMT
LRWT_f3p0_1209_transcript57283_g2	RecName: Full=(RS)-norcoclaurine 6-O-methyltransferase; AltName: Full=S-adenosyl-L-methionine:norcoclaurine 6-O-methyltransferase; Short=6-OMT
LRWT_f87p0_894_transcript67796_g1	Receptor-like protein kinase-related family protein [Theobroma cacao]
LRWT_f2p0_3092_transcript12428_g7	Receptor serine/threonine kinase [Theobroma cacao]
LRWT_f9p0_1571_transcript41972_g1	Receptor serine/threonine kinase [Theobroma cacao]
LRWT_f3p0_2616_transcript18419_g1	Receptor like protein kinase S.2 [Glycine soja]
LRWT_f6p0_2860_transcript14854_g1	Receptor like protein kinase S.2 [Glycine soja]
LRWT_f2p0_723_transcript79570_g18	Ralf-like 33, putative [Theobroma cacao]
LRWT_f2p0_729_transcript78611_g19	Ralf-like 32, putative [Theobroma cacao]
LRWT_f2p0_920_transcript69159_g4	Ralf-like 32, putative [Theobroma cacao]
LRWT_f3p0_921_transcript69135_g3	RAB GTPase-like protein A5B [Medicago truncatula]
LRWT_f18p0_1434_transcript48314_g1	pyridine nucleotide-disulfide oxidoreductase family protein [Populus trichocarpa]
LRWT_f5p0_1708_transcript38862_g3	putative Tubulin alpha chain [Zostera marina]
LRWT_f6p0_3382_transcript8863_g2	putative symbiosis receptor-like kinase [Papaver rhoeas]
LRWT_f4p0_1686_transcript38819_g2	putative pectin methylesterase family protein [Populus trichocarpa]
LRWT_f4p0_787_transcript74107_g2	putative LEA III protein isoform 1 [Corylus avellana]
LRWT_f2p0_622_transcript82942_g1	putative LEA III protein isoform 1 [Corylus avellana]
LRWT_f14p0_1681_transcript36798_g1	putative cytochrome P450 monooxygenase [Actaea racemosa]
LRWT_f31p0_1619_transcript38746_g2	putative cytochrome P450 monooxygenase [Actaea racemosa]
LRWT_f2p0_1660_transcript40452_g10	putative cytochrome P450 monooxygenase [Actaea racemosa]
LRWT_f2p0_1929_transcript32004_g4	putative cytochrome P450 monooxygenase [Actaea racemosa]
LRWT_f10p0_1581_transcript42087_g1	putative cytochrome P450 monooxygenase [Actaea racemosa]
LRWT_f8p0_1705_transcript38190_g3	putative cytochrome P450 monooxygenase [Actaea racemosa]
LRWT_f4p0_1731_transcript35820_g1	putative cytochrome P450 monooxygenase [Actaea racemosa]
LRWT_f4p0_1755_transcript36706_g3	putative cytochrome P450 monooxygenase [Actaea racemosa]
LRWT_f3p0_2296_transcript24201_g4	putative cytochrome P450 monooxygenase [Actaea racemosa]
LRWT_f2p0_1762_transcript36934_g8	putative cytochrome P450 monooxygenase [Actaea racemosa]
LRWT_f4p0_1691_transcript39054_g2	putative cytochrome P450 monooxygenase [Actaea racemosa]
LRWT_f3p0_1872_transcript33631_g4	putative cytochrome P450 monooxygenase [Actaea racemosa]
LRWT_f27p0_1687_transcript36946_g1	putative cytochrome P450 monooxygenase [Actaea racemosa]
LRWT_f16p0_769_transcript75373_g1	putative calcium-binding protein CML45 [Morus notabilis]
LRWT_f3p0_1794_transcript35881_g1	putative anthocyanin acyltransferase [Epimedium sagittatum]
LRWT_f3p0_1821_transcript35230_g3	putative anthocyanin acyltransferase [Epimedium sagittatum]
LRWT_f3p0_1927_transcript32077_g2	putative acyl-glucose-dependent anthocyanin acyltransferase [Delphinium grandiflorum]
LRWT_f7p0_1578_transcript42176_g2	putative acyl-glucose-dependent anthocyanin acyltransferase [Delphinium grandiflorum]
LRWT_f3p0_2297_transcript24038_g5	proton-dependent oligopeptide transport family protein [Populus trichocarpa]
LRWT_f27p0_1808_transcript32525_g1	Protein TRANSPARENT TESTA 12 -like protein [Gossypium arboreum]
LRWT_f16p0_1054_transcript60445_g1	protein 2 [Petunia x hybrida]
LRWT_f4p0_529_transcript88910_g5	protease inhibitor [Vitis vinifera]
LRWT_f6p0_521_transcript88709_g2	protease inhibitor [Vitis vinifera]
LRWT_f20p0_410_transcript93373_g1	protease inhibitor [Vitis vinifera]
LRWT_f2p0_1564_transcript43741_g8	probable L-ascorbate peroxidase 6, chloroplastic [Nelumbo nucifera]
LRWT_f36p0_917_transcript68195_g1	PREDICTED: zinc finger protein ZAT10 [Vitis vinifera]
LRWT_f2p0_2081_transcript28306_g4	PREDICTED: zinc finger protein NUTCRACKER-like [Nelumbo nucifera]
LRWT_f3p0_2301_transcript23982_g4	PREDICTED: zinc finger protein MAGPIE-like [Nelumbo nucifera]
LRWT_f50p0_903_transcript68818_g1	PREDICTED: zinc finger protein 6 [Vitis vinifera]
LRWT_f11p0_685_transcript79203_g1	PREDICTED: zinc finger AN1 domain-containing stress-associated protein 12 [Prunus mume]
LRWT_f2p0_936_transcript69106_g23	PREDICTED: zinc finger A20 and AN1 domain-containing stress-associated protein 6-like [Nelumbo nucifera]
LRWT_f4p0_1000_transcript65715_g3	PREDICTED: zinc finger A20 and AN1 domain-containing stress-associated protein 4 [Vitis vinifera]
LRWT_f4p0_1724_transcript38726_g4	PREDICTED: zeaxanthin epoxidase, chloroplastic-like [Pyrus x bretschneideri]
LRWT_f6p0_1678_transcript39725_g5	PREDICTED: zeaxanthin epoxidase, chloroplastic-like [Pyrus x bretschneideri]
LRWT_f3p0_1613_transcript41607_g3	PREDICTED: zeaxanthin epoxidase, chloroplastic-like [Eucalyptus grandis]
LRWT_f11p0_1569_transcript43311_g1	PREDICTED: zeatin O-glucosyltransferase-like [Nelumbo nucifera]
LRWT_f8p0_1569_transcript43003_g1	PREDICTED: zeatin O-glucosyltransferase-like [Nelumbo nucifera]
LRWT_f2p0_1139_transcript60126_g8	PREDICTED: xyloglucan endotransglucosylase/hydrolase protein 9 [Nelumbo nucifera]
LRWT_f4p0_1131_transcript60317_g8	PREDICTED: xyloglucan endotransglucosylase/hydrolase protein 9 [Nelumbo nucifera]
LRWT_f31p0_605_transcript84006_g1	PREDICTED: wound-induced protein 1 [Nelumbo nucifera]
LRWT_f2p0_1915_transcript32338_g6	PREDICTED: WAT1-related protein At5g40240-like isoform X2 [Nelumbo nucifera]
LRWT_f2p0_2024_transcript30050_g11	PREDICTED: WAT1-related protein At5g40240-like isoform X1 [Nelumbo nucifera]
LRWT_f3p0_1130_transcript60751_g3	PREDICTED: WAT1-related protein At4g15540-like [Nelumbo nucifera]
LRWT_f8p0_1240_transcript54609_g2	PREDICTED: WAT1-related protein At4g15540-like [Nelumbo nucifera]
LRWT_f6p0_1340_transcript51553_g4	PREDICTED: WAT1-related protein At3g30340-like isoform X1 [Nelumbo nucifera]
LRWT_f79p0_1432_transcript47261_g1	PREDICTED: WAT1-related protein At1g21890 [Nelumbo nucifera]
LRWT_f5p0_1438_transcript47820_g1	PREDICTED: WAT1-related protein At1g09380 isoform X1 [Nelumbo nucifera]
LRWT_f4p0_2150_transcript25412_g1	PREDICTED: wall-associated receptor kinase-like 20 [Nelumbo nucifera]
LRWT_f6p0_1450_transcript47432_g4	PREDICTED: vinorine synthase-like [Prunus mume]
LRWT_f3p0_2512_transcript17814_g1	PREDICTED: vacuolar-sorting receptor 7 [Nelumbo nucifera]
LRWT_f3p0_930_transcript68732_g1	PREDICTED: vacuolar protein sorting-associated protein 2 homolog 1 [Solanum tuberosum]
LRWT_f3p0_2273_transcript24531_g4	PREDICTED: UV-stimulated scaffold protein A homolog isoform X1 [Nelumbo nucifera]
LRWT_f2p0_840_transcript72842_g3	PREDICTED: universal stress protein A-like protein isoform X2 [Nelumbo nucifera]
LRWT_f8p0_680_transcript80034_g1	PREDICTED: universal stress protein A-like protein [Nelumbo nucifera]
LRWT_f8p0_795_transcript73637_g2	PREDICTED: universal stress protein A-like protein [Gossypium raimondii]
LRWT_f8p0_893_transcript69731_g2	PREDICTED: universal stress protein A-like protein [Eucalyptus grandis]
LRWT_f27p0_1751_transcript36198_g1	PREDICTED: uncharacterized transporter YBR287W-like [Pyrus x bretschneideri]
LRWT_f3p0_2087_transcript28535_g3	PREDICTED: uncharacterized protein slp1-like [Nelumbo nucifera]
LRWT_f3p0_897_transcript70138_g1	PREDICTED: uncharacterized protein Os08g0359500-like [Nelumbo nucifera]
LRWT_f17p0_821_transcript73350_g1	PREDICTED: uncharacterized protein LOC8289628 [Ricinus communis]
LRWT_f6p0_462_transcript92659_g3	PREDICTED: uncharacterized protein LOC8288554 [Ricinus communis]
LRWT_f9p0_480_transcript91205_g1	PREDICTED: uncharacterized protein LOC8288554 [Ricinus communis]
LRWT_f5p0_1477_transcript44134_g1	PREDICTED: uncharacterized protein LOC8275475 isoform X2 [Ricinus communis]
LRWT_f6p0_1363_transcript50352_g3	PREDICTED: uncharacterized protein LOC8275475 isoform X1 [Ricinus communis]
LRWT_f2p0_732_transcript78290_g7	PREDICTED: uncharacterized protein LOC8266021 [Ricinus communis]
LRWT_f6p0_967_transcript64382_g3	PREDICTED: uncharacterized protein LOC8265292 [Ricinus communis]
LRWT_f8p0_606_transcript83197_g3	PREDICTED: uncharacterized protein LOC4348445 [Oryza sativa Japonica Group]
LRWT_f3p0_936_transcript68754_g8	PREDICTED: uncharacterized protein LOC107060638 [Solanum tuberosum]
LRWT_f5p0_913_transcript69898_g2	PREDICTED: uncharacterized protein LOC105974229 [Erythranthe guttata]
LRWT_f2p0_1596_transcript42620_g15	PREDICTED: uncharacterized protein LOC105794270 [Gossypium raimondii]
LRWT_f6p0_799_transcript74781_g2	PREDICTED: uncharacterized protein LOC105794183 [Gossypium raimondii]
LRWT_f3p0_1840_transcript34529_g5	PREDICTED: uncharacterized protein LOC105780870 [Gossypium raimondii]
LRWT_f4p0_471_transcript92161_g2	PREDICTED: uncharacterized protein LOC105636508 [Jatropha curcas]
LRWT_f2p0_654_transcript82387_g8	PREDICTED: uncharacterized protein LOC105634993 [Jatropha curcas]
LRWT_f13p0_2056_transcript27451_g1	PREDICTED: uncharacterized protein LOC105630609 [Jatropha curcas]
LRWT_f8p0_623_transcript83050_g1	PREDICTED: uncharacterized protein LOC105351441 [Fragaria vesca subsp. vesca]
LRWT_f4p0_812_transcript74167_g5	PREDICTED: uncharacterized protein LOC105123288 [Populus euphratica]
LRWT_f24p0_891_transcript69384_g1	PREDICTED: uncharacterized protein LOC105054633 [Elaeis guineensis]
LRWT_f2p0_2063_transcript28998_g12	PREDICTED: uncharacterized protein LOC105044489 isoform X2 [Elaeis guineensis]
LRWT_f3p0_1306_transcript53145_g3	PREDICTED: uncharacterized protein LOC104881673 isoform X1 [Vitis vinifera]
LRWT_f22p0_650_transcript81943_g1	PREDICTED: uncharacterized protein LOC104881559 [Vitis vinifera]
LRWT_f3p0_620_transcript84283_g4	PREDICTED: uncharacterized protein LOC104878418 [Vitis vinifera]
LRWT_f2p0_894_transcript70361_g4	PREDICTED: uncharacterized protein LOC104826141 [Tarenaya hassleriana]
LRWT_f7p0_858_transcript70639_g1	PREDICTED: uncharacterized protein LOC104751277 [Camelina sativa]
LRWT_f37p0_582_transcript80529_g1	PREDICTED: uncharacterized protein LOC104612811 [Nelumbo nucifera]
LRWT_f2p0_1390_transcript50098_g8	PREDICTED: uncharacterized protein LOC104612514 [Nelumbo nucifera]
LRWT_f28p0_365_transcript97583_g2	PREDICTED: uncharacterized protein LOC104612255 [Nelumbo nucifera]
LRWT_f3p0_1832_transcript35340_g8	PREDICTED: uncharacterized protein LOC104612134 isoform X1 [Nelumbo nucifera]
LRWT_f4p0_2020_transcript29509_g1	PREDICTED: uncharacterized protein LOC104611170 [Nelumbo nucifera]
LRWT_f2p0_1894_transcript33081_g6	PREDICTED: uncharacterized protein LOC104611127 [Nelumbo nucifera]
LRWT_f9p0_1043_transcript60074_g1	PREDICTED: uncharacterized protein LOC104610449 [Nelumbo nucifera]
LRWT_f7p0_1626_transcript40985_g2	PREDICTED: uncharacterized protein LOC104609785 [Nelumbo nucifera]
LRWT_f3p0_1525_transcript45179_g4	PREDICTED: uncharacterized protein LOC104609452 [Nelumbo nucifera]
LRWT_f4p0_817_transcript73596_g1	PREDICTED: uncharacterized protein LOC104608813 [Nelumbo nucifera]
LRWT_f2p0_988_transcript66340_g10	PREDICTED: uncharacterized protein LOC104608799 [Nelumbo nucifera]
LRWT_f2p0_799_transcript74903_g9	PREDICTED: uncharacterized protein LOC104608799 [Nelumbo nucifera]
LRWT_f8p0_725_transcript77570_g2	PREDICTED: uncharacterized protein LOC104608638 [Nelumbo nucifera]
LRWT_f8p0_744_transcript76489_g1	PREDICTED: uncharacterized protein LOC104608632 isoform X2 [Nelumbo nucifera]
LRWT_f2p0_1421_transcript48935_g7	PREDICTED: uncharacterized protein LOC104608217 [Nelumbo nucifera]
LRWT_f13p0_1066_transcript61263_g2	PREDICTED: uncharacterized protein LOC104608217 [Nelumbo nucifera]
LRWT_f12p0_1080_transcript62143_g1	PREDICTED: uncharacterized protein LOC104607809 [Nelumbo nucifera]
LRWT_f4p0_1040_transcript63901_g1	PREDICTED: uncharacterized protein LOC104607594 [Nelumbo nucifera]
LRWT_f4p0_1023_transcript64696_g4	PREDICTED: uncharacterized protein LOC104607594 [Nelumbo nucifera]
LRWT_f7p0_2253_transcript23925_g1	PREDICTED: uncharacterized protein LOC104606578 [Nelumbo nucifera]
LRWT_f2p0_758_transcript77000_g10	PREDICTED: uncharacterized protein LOC104605969 [Nelumbo nucifera]
LRWT_f2p0_917_transcript69339_g12	PREDICTED: uncharacterized protein LOC104605969 [Nelumbo nucifera]
LRWT_f5p0_1239_transcript56220_g8	PREDICTED: uncharacterized protein LOC104605699 [Nelumbo nucifera]
LRWT_f7p0_1143_transcript59812_g4	PREDICTED: uncharacterized protein LOC104605593 [Nelumbo nucifera]
LRWT_f3p0_1199_transcript56857_g1	PREDICTED: uncharacterized protein LOC104605074 [Nelumbo nucifera]
LRWT_f2p0_2051_transcript29413_g3	PREDICTED: uncharacterized protein LOC104604665 [Nelumbo nucifera]
LRWT_f5p0_563_transcript86012_g4	PREDICTED: uncharacterized protein LOC104604235 [Nelumbo nucifera]
LRWT_f5p0_1324_transcript50056_g1	PREDICTED: uncharacterized protein LOC104603510 [Nelumbo nucifera]
LRWT_f2p0_682_transcript80925_g2	PREDICTED: uncharacterized protein LOC104603380 [Nelumbo nucifera]
LRWT_f4p0_546_transcript88198_g6	PREDICTED: uncharacterized protein LOC104603373 [Nelumbo nucifera]
LRWT_f2p0_734_transcript79354_g19	PREDICTED: uncharacterized protein LOC104602976 [Nelumbo nucifera]
LRWT_f2p0_1367_transcript50948_g7	PREDICTED: uncharacterized protein LOC104602642 [Nelumbo nucifera]
LRWT_f12p0_972_transcript66088_g1	PREDICTED: uncharacterized protein LOC104601818 [Nelumbo nucifera]
LRWT_f2p0_1742_transcript37601_g5	PREDICTED: uncharacterized protein LOC104601764 isoform X1 [Nelumbo nucifera]
LRWT_f6p0_1406_transcript48448_g3	PREDICTED: uncharacterized protein LOC104601677 isoform X1 [Nelumbo nucifera]
LRWT_f2p0_766_transcript76580_g11	PREDICTED: uncharacterized protein LOC104601591 [Nelumbo nucifera]
LRWT_f82p0_3149_transcript10574_g1	PREDICTED: uncharacterized protein LOC104601555 [Nelumbo nucifera]
LRWT_f5p0_757_transcript72398_g1	PREDICTED: uncharacterized protein LOC104601373 [Nelumbo nucifera]
LRWT_f4p0_1064_transcript62748_g2	PREDICTED: uncharacterized protein LOC104601361 [Nelumbo nucifera]
LRWT_f7p0_1197_transcript56925_g1	PREDICTED: uncharacterized protein LOC104601163 [Nelumbo nucifera]
LRWT_f28p0_1193_transcript54506_g1	PREDICTED: uncharacterized protein LOC104601051 [Nelumbo nucifera]
LRWT_f2p0_1500_transcript46028_g6	PREDICTED: uncharacterized protein LOC104600645 [Nelumbo nucifera]
LRWT_f23p0_905_transcript66273_g1	PREDICTED: uncharacterized protein LOC104600589 [Nelumbo nucifera]
LRWT_f2p0_557_transcript87606_g7	PREDICTED: uncharacterized protein LOC104600432 [Nelumbo nucifera]
LRWT_f3p0_1666_transcript40306_g5	PREDICTED: uncharacterized protein LOC104600329 [Nelumbo nucifera]
LRWT_f2p0_1900_transcript33173_g6	PREDICTED: uncharacterized protein LOC104599557 isoform X2 [Nelumbo nucifera]
LRWT_f9p0_1519_transcript45149_g1	PREDICTED: uncharacterized protein LOC104599441 [Nelumbo nucifera]
LRWT_f2p0_4792_transcript1811_g1	PREDICTED: uncharacterized protein LOC104599262 [Nelumbo nucifera]
LRWT_f6p0_954_transcript67076_g4	PREDICTED: uncharacterized protein LOC104599189 [Nelumbo nucifera]
LRWT_f2p0_1020_transcript64910_g4	PREDICTED: uncharacterized protein LOC104599189 [Nelumbo nucifera]
LRWT_f2p0_608_transcript84990_g13	PREDICTED: uncharacterized protein LOC104597668 [Nelumbo nucifera]
LRWT_f6p0_1862_transcript33592_g3	PREDICTED: uncharacterized protein LOC104596392 isoform X3 [Nelumbo nucifera]
LRWT_f3p0_1552_transcript44065_g1	PREDICTED: uncharacterized protein LOC104596392 isoform X3 [Nelumbo nucifera]
LRWT_f2p0_1931_transcript32173_g8	PREDICTED: uncharacterized protein LOC104596392 isoform X3 [Nelumbo nucifera]
LRWT_f8p0_419_transcript92802_g3	PREDICTED: uncharacterized protein LOC104596392 isoform X3 [Nelumbo nucifera]
LRWT_f9p0_2318_transcript21780_g1	PREDICTED: uncharacterized protein LOC104596031 [Nelumbo nucifera]
LRWT_f22p0_1003_transcript63416_g1	PREDICTED: uncharacterized protein LOC104596023 [Nelumbo nucifera]
LRWT_f3p0_1291_transcript54004_g6	PREDICTED: uncharacterized protein LOC104595774 [Nelumbo nucifera]
LRWT_f3p0_2651_transcript18178_g1	PREDICTED: uncharacterized protein LOC104595562 [Nelumbo nucifera]
LRWT_f5p0_1005_transcript64765_g2	PREDICTED: uncharacterized protein LOC104595401 [Nelumbo nucifera]
LRWT_f3p0_2529_transcript20060_g2	PREDICTED: uncharacterized protein LOC104594975 [Nelumbo nucifera]
LRWT_f4p0_621_transcript83364_g2	PREDICTED: uncharacterized protein LOC104594383 [Nelumbo nucifera]
LRWT_f2p0_1303_transcript53481_g7	PREDICTED: uncharacterized protein LOC104593437 [Nelumbo nucifera]
LRWT_f5p0_913_transcript67093_g1	PREDICTED: uncharacterized protein LOC104592990 [Nelumbo nucifera]
LRWT_f5p0_879_transcript70824_g3	PREDICTED: uncharacterized protein LOC104592990 [Nelumbo nucifera]
LRWT_f68p0_1547_transcript40952_g1	PREDICTED: uncharacterized protein LOC104592737 [Nelumbo nucifera]
LRWT_f6p0_936_transcript67716_g1	PREDICTED: uncharacterized protein LOC104592726 [Nelumbo nucifera]
LRWT_f3p0_958_transcript67557_g6	PREDICTED: uncharacterized protein LOC104592726 [Nelumbo nucifera]
LRWT_f2p0_496_transcript90949_g9	PREDICTED: uncharacterized protein LOC104592622 [Nelumbo nucifera]
LRWT_f2p0_2796_transcript16101_g6	PREDICTED: uncharacterized protein LOC104592270 [Nelumbo nucifera]
LRWT_f8p0_1534_transcript43797_g2	PREDICTED: uncharacterized protein LOC104592159 [Nelumbo nucifera]
LRWT_f8p0_736_transcript75338_g2	PREDICTED: uncharacterized protein LOC104591786 [Nelumbo nucifera]
LRWT_f2p0_715_transcript79362_g24	PREDICTED: uncharacterized protein LOC104591250 [Nelumbo nucifera]
LRWT_f3p0_953_transcript67732_g3	PREDICTED: uncharacterized protein LOC104590110 [Nelumbo nucifera]
LRWT_f10p0_391_transcript94310_g1	PREDICTED: uncharacterized protein LOC104589372 [Nelumbo nucifera]
LRWT_f82p0_1300_transcript50702_g1	PREDICTED: uncharacterized protein LOC104588419 [Nelumbo nucifera]
LRWT_f2p0_1965_transcript31110_g8	PREDICTED: uncharacterized protein LOC104587823 [Nelumbo nucifera]
LRWT_f7p0_2186_transcript25408_g1	PREDICTED: uncharacterized protein LOC104587751 [Nelumbo nucifera]
LRWT_f2p0_1317_transcript52913_g6	PREDICTED: uncharacterized protein LOC104587276 [Nelumbo nucifera]
LRWT_f4p0_1864_transcript33926_g2	PREDICTED: uncharacterized protein LOC104586931 [Nelumbo nucifera]
LRWT_f7p0_762_transcript75076_g1	PREDICTED: uncharacterized protein LOC104586857 [Nelumbo nucifera]
LRWT_f2p0_1824_transcript34858_g4	PREDICTED: uncharacterized protein LOC104586761 [Nelumbo nucifera]
LRWT_f2p0_525_transcript89321_g6	PREDICTED: uncharacterized protein LOC104586540 [Nelumbo nucifera]
LRWT_f2p0_1249_transcript55889_g15	PREDICTED: uncharacterized protein LOC104585885 [Nelumbo nucifera]
LRWT_f2p0_1103_transcript61714_g23	PREDICTED: uncharacterized protein LOC104585807 [Nelumbo nucifera]
LRWT_f13p0_427_transcript94198_g2	PREDICTED: uncharacterized protein LOC104585804 [Nelumbo nucifera]
LRWT_f5p0_443_transcript93238_g4	PREDICTED: uncharacterized protein LOC104585804 [Nelumbo nucifera]
LRWT_f3p0_416_transcript93743_g1	PREDICTED: uncharacterized protein LOC104585804 [Nelumbo nucifera]
LRWT_f7p0_624_transcript83825_g3	PREDICTED: uncharacterized protein LOC104448768 isoform X1 [Eucalyptus grandis]
LRWT_f3p0_2090_transcript28123_g3	PREDICTED: uncharacterized protein LOC104431099 [Eucalyptus grandis]
LRWT_f2p0_1625_transcript41690_g10	PREDICTED: uncharacterized protein LOC104419566 [Eucalyptus grandis]
LRWT_f7p0_1683_transcript39275_g2	PREDICTED: uncharacterized protein LOC104419566 [Eucalyptus grandis]
LRWT_f7p0_550_transcript87840_g3	PREDICTED: uncharacterized protein LOC104228368 [Nicotiana sylvestris]
LRWT_f2p0_442_transcript93957_g9	PREDICTED: uncharacterized protein LOC104228268 isoform X2 [Nicotiana sylvestris]
LRWT_f2p0_1141_transcript59057_g1	PREDICTED: uncharacterized protein LOC104117279 [Nicotiana tomentosiformis]
LRWT_f2p0_811_transcript75089_g16	PREDICTED: uncharacterized protein LOC104114536 [Nicotiana tomentosiformis]
LRWT_f6p0_793_transcript74959_g2	PREDICTED: uncharacterized protein LOC104093419 [Nicotiana tomentosiformis]
LRWT_f6p0_912_transcript69302_g3	PREDICTED: uncharacterized protein LOC103964515 [Pyrus x bretschneideri]
LRWT_f4p0_969_transcript66544_g1	PREDICTED: uncharacterized protein LOC103949307 [Pyrus x bretschneideri]
LRWT_f2p0_425_transcript94746_g3	PREDICTED: uncharacterized protein LOC103846331 [Brassica rapa]
LRWT_f194p0_977_transcript64840_g1	PREDICTED: uncharacterized protein LOC103720708 [Phoenix dactylifera]
LRWT_f10p0_801_transcript73367_g1	PREDICTED: uncharacterized protein LOC103707859 [Phoenix dactylifera]
LRWT_f4p0_962_transcript67358_g4	PREDICTED: uncharacterized protein LOC103703026 [Phoenix dactylifera]
LRWT_f4p0_1076_transcript62247_g2	PREDICTED: uncharacterized protein LOC103699457 isoform X1 [Phoenix dactylifera]
LRWT_f2p0_566_transcript87151_g4	PREDICTED: uncharacterized protein LOC103500636 [Cucumis melo]
LRWT_f13p0_1208_transcript52925_g1	PREDICTED: uncharacterized protein LOC103487198 [Cucumis melo]
LRWT_f4p0_1581_transcript42078_g1	PREDICTED: uncharacterized protein LOC103341566 [Prunus mume]
LRWT_f37p0_565_transcript82286_g1	PREDICTED: uncharacterized protein LOC103335693 [Prunus mume]
LRWT_f2p0_630_transcript83678_g4	PREDICTED: uncharacterized protein LOC103335530 [Prunus mume]
LRWT_f46p0_1443_transcript45893_g1	PREDICTED: uncharacterized protein LOC102625567 isoform X2 [Citrus sinensis]
LRWT_f4p0_1395_transcript49890_g7	PREDICTED: uncharacterized protein LOC102609018 isoform X1 [Citrus sinensis]
LRWT_f9p0_1064_transcript60889_g1	PREDICTED: uncharacterized protein LOC101763772 [Setaria italica]
LRWT_f3p0_486_transcript91520_g4	PREDICTED: uncharacterized protein LOC101513746 [Cicer arietinum]
LRWT_f4p0_605_transcript84015_g3	PREDICTED: uncharacterized protein LOC101513746 [Cicer arietinum]
LRWT_f2p0_2319_transcript23712_g7	PREDICTED: uncharacterized protein LOC101302817 [Fragaria vesca subsp. vesca]
LRWT_f2p0_479_transcript91879_g2	PREDICTED: uncharacterized protein LOC101298622 [Fragaria vesca subsp. vesca]
LRWT_f2p0_1491_transcript46386_g5	PREDICTED: uncharacterized protein LOC101295702 isoform X2 [Fragaria vesca subsp. vesca]
LRWT_f2p0_770_transcript76365_g1	PREDICTED: uncharacterized protein LOC101247750 [Solanum lycopersicum]
LRWT_f4p0_2220_transcript24861_g1	PREDICTED: uncharacterized protein LOC101216821 [Cucumis sativus]
LRWT_f4p0_697_transcript77048_g1	PREDICTED: uncharacterized protein LOC100268083 [Vitis vinifera]
LRWT_f3p0_654_transcript82797_g9	PREDICTED: uncharacterized protein LOC100267059 [Vitis vinifera]
LRWT_f3p0_936_transcript69796_g14	PREDICTED: uncharacterized protein LOC100266883 [Vitis vinifera]
LRWT_f32p0_1578_transcript42243_g3	PREDICTED: uncharacterized protein LOC100265335 isoform X2 [Vitis vinifera]
LRWT_f13p0_1457_transcript47041_g1	PREDICTED: uncharacterized protein LOC100263058 [Vitis vinifera]
LRWT_f6p0_1551_transcript43324_g1	PREDICTED: uncharacterized protein LOC100260823 [Vitis vinifera]
LRWT_f2p0_1008_transcript66220_g18	PREDICTED: uncharacterized protein LOC100259118 [Vitis vinifera]
LRWT_f33p0_668_transcript79145_g1	PREDICTED: uncharacterized protein LOC100259078 [Vitis vinifera]
LRWT_f2p0_1043_transcript63930_g10	PREDICTED: uncharacterized protein LOC100255783 [Vitis vinifera]
LRWT_f11p0_1671_transcript38060_g2	PREDICTED: uncharacterized protein LOC100250791 [Vitis vinifera]
LRWT_f8p0_937_transcript67582_g2	PREDICTED: uncharacterized protein LOC100249761 [Vitis vinifera]
LRWT_f7p0_1436_transcript47355_g2	PREDICTED: uncharacterized protein LOC100249081 [Vitis vinifera]
LRWT_f11p0_860_transcript71165_g1	PREDICTED: uncharacterized protein LOC100246370 isoform X1 [Vitis vinifera]
LRWT_f3p0_1205_transcript57428_g4	PREDICTED: uncharacterized protein LOC100244210 [Vitis vinifera]
LRWT_f5p0_648_transcript82649_g4	PREDICTED: uncharacterized protein LOC100242530 [Vitis vinifera]
LRWT_f4p0_781_transcript75950_g10	PREDICTED: uncharacterized protein At5g65660 [Citrus sinensis]
LRWT_f10p0_693_transcript76702_g1	PREDICTED: uncharacterized protein At4g22758 [Vitis vinifera]
LRWT_f2p0_1060_transcript63553_g13	PREDICTED: uncharacterized protein At3g27210-like [Nelumbo nucifera]
LRWT_f3p0_1158_transcript59344_g5	PREDICTED: uncharacterized protein At2g34460, chloroplastic-like [Camelina sativa]
LRWT_f4p0_958_transcript66942_g4	PREDICTED: uncharacterized protein At2g34460, chloroplastic [Vigna radiata var. radiata]
LRWT_f2p0_1090_transcript61963_g9	PREDICTED: uncharacterized acetyltransferase At3g50280-like [Nelumbo nucifera]
LRWT_f2p0_1636_transcript41245_g7	PREDICTED: uncharacterized acetyltransferase At3g50280-like [Nelumbo nucifera]
LRWT_f9p0_1660_transcript39831_g1	PREDICTED: uncharacterized acetyltransferase At3g50280-like [Nelumbo nucifera]
LRWT_f11p0_1592_transcript42208_g1	PREDICTED: uncharacterized acetyltransferase At3g50280 [Nelumbo nucifera]
LRWT_f4p0_1687_transcript39361_g8	PREDICTED: uncharacterized acetyltransferase At3g50280 [Nelumbo nucifera]
LRWT_f2p0_1662_transcript40204_g4	PREDICTED: uncharacterized acetyltransferase At3g50280 [Nelumbo nucifera]
LRWT_f2p0_5144_transcript1341_g1	PREDICTED: UDP-N-acetylmuramate--L-alanine ligase-like isoform X1 [Solanum tuberosum]
LRWT_f4p0_1577_transcript42459_g3	PREDICTED: UDP-glycosyltransferase 92A1 [Nelumbo nucifera]
LRWT_f4p0_1717_transcript36565_g2	PREDICTED: UDP-glycosyltransferase 92A1 [Nelumbo nucifera]
LRWT_f2p0_1856_transcript34063_g2	PREDICTED: UDP-glycosyltransferase 91C1-like [Nelumbo nucifera]
LRWT_f7p0_1702_transcript37185_g2	PREDICTED: UDP-glycosyltransferase 83A1-like isoform X2 [Vitis vinifera]
LRWT_f2p0_1624_transcript41666_g10	PREDICTED: UDP-glycosyltransferase 83A1-like isoform X1 [Vitis vinifera]
LRWT_f5p0_1548_transcript43836_g2	PREDICTED: UDP-glycosyltransferase 82A1 [Vitis vinifera]
LRWT_f99p0_1581_transcript40498_g1	PREDICTED: UDP-glycosyltransferase 74F2-like [Nelumbo nucifera]
LRWT_f15p0_1573_transcript41976_g1	PREDICTED: UDP-glycosyltransferase 74F2-like [Nelumbo nucifera]
LRWT_f2p0_1799_transcript35291_g2	PREDICTED: UDP-glycosyltransferase 73D1 [Vitis vinifera]
LRWT_f4p0_1581_transcript42577_g3	PREDICTED: UDP-glycosyltransferase 73C3 [Vitis vinifera]
LRWT_f13p0_1739_transcript36031_g1	PREDICTED: UDP-glycosyltransferase 73C3 [Vitis vinifera]
LRWT_f7p0_1701_transcript37736_g2	PREDICTED: UDP-glycosyltransferase 73C3 [Vitis vinifera]
LRWT_f4p0_1589_transcript42786_g2	PREDICTED: UDP-glycosyltransferase 73C1-like [Nelumbo nucifera]
LRWT_f5p0_1669_transcript39834_g5	PREDICTED: UDP-glycosyltransferase 73C1-like [Nelumbo nucifera]
LRWT_f7p0_1680_transcript38149_g1	PREDICTED: UDP-glycosyltransferase 73B4-like [Nelumbo nucifera]
LRWT_f20p0_1288_transcript52617_g2	PREDICTED: UDP-galactose/UDP-glucose transporter 3 [Nelumbo nucifera]
LRWT_f4p0_1889_transcript32008_g1	PREDICTED: UDP-arabinose 4-epimerase 1 [Gossypium raimondii]
LRWT_f4p0_881_transcript70038_g2	PREDICTED: ubiquitin-conjugating enzyme E2 1-like [Nelumbo nucifera]
LRWT_f2p0_2315_transcript23708_g1	PREDICTED: type I inositol 1,4,5-trisphosphate 5-phosphatase CVP2 isoform X1 [Nelumbo nucifera]
LRWT_f3p0_2438_transcript21652_g2	PREDICTED: type I inositol 1,4,5-trisphosphate 5-phosphatase 2-like isoform X1 [Nelumbo nucifera]
LRWT_f2p0_2651_transcript18331_g8	PREDICTED: two-component response regulator-like PRR95 [Nelumbo nucifera]
LRWT_f9p0_3295_transcript9418_g1	PREDICTED: two-component response regulator-like PRR37 [Nelumbo nucifera]
LRWT_f8p0_1678_transcript38947_g1	PREDICTED: triose phosphate/phosphate translocator TPT, chloroplastic isoform X1 [Ricinus communis]
LRWT_f6p0_1333_transcript51309_g3	PREDICTED: trans-resveratrol di-O-methyltransferase-like [Citrus sinensis]
LRWT_f9p0_1346_transcript51234_g2	PREDICTED: trans-resveratrol di-O-methyltransferase-like [Citrus sinensis]
LRWT_f7p0_1341_transcript51401_g1	PREDICTED: trans-resveratrol di-O-methyltransferase-like [Citrus sinensis]
LRWT_f9p0_1374_transcript50373_g1	PREDICTED: trans-resveratrol di-O-methyltransferase-like [Citrus sinensis]
LRWT_f101p0_1216_transcript53273_g1	PREDICTED: trans-resveratrol di-O-methyltransferase [Vitis vinifera]
LRWT_f11p0_1146_transcript59026_g1	PREDICTED: transmembrane protein 45B-like [Populus euphratica]
LRWT_f9p0_1269_transcript51943_g1	PREDICTED: transmembrane protein 184 homolog DDB_G0279555 [Ricinus communis]
LRWT_f15p0_795_transcript73523_g2	PREDICTED: transmembrane emp24 domain-containing protein p24beta3 [Nelumbo nucifera]
LRWT_f27p0_1461_transcript45956_g1	PREDICTED: transcription repressor OFP1 [Nelumbo nucifera]
LRWT_f11p0_1070_transcript62604_g1	PREDICTED: transcription factor TGA6-like [Gossypium raimondii]
LRWT_f5p0_940_transcript68244_g3	PREDICTED: transcription factor TGA5-like [Nelumbo nucifera]
LRWT_f2p0_715_transcript79087_g5	PREDICTED: transcription factor TGA5-like [Nelumbo nucifera]
LRWT_f3p0_827_transcript73372_g1	PREDICTED: transcription factor TGA5-like [Nelumbo nucifera]
LRWT_f3p0_928_transcript69205_g4	PREDICTED: transcription factor TGA4-like [Malus domestica]
LRWT_f3p0_1139_transcript60054_g6	PREDICTED: transcription factor TGA2-like [Prunus mume]
LRWT_f2p0_1872_transcript33683_g11	PREDICTED: transcription factor TGA1-like isoform X2 [Nelumbo nucifera]
LRWT_f2p0_2117_transcript27552_g12	PREDICTED: transcription factor TGA1-like isoform X2 [Nelumbo nucifera]
LRWT_f2p0_1871_transcript34558_g6	PREDICTED: transcription factor TGA1-like isoform X2 [Nelumbo nucifera]
LRWT_f4p0_1378_transcript50539_g4	PREDICTED: transcription factor RAX2-like [Nelumbo nucifera]
LRWT_f10p0_505_transcript90166_g2	PREDICTED: transcription factor PRE6-like [Nelumbo nucifera]
LRWT_f3p0_1544_transcript45304_g9	PREDICTED: transcription factor MYC2-like [Vitis vinifera]
LRWT_f5p0_2171_transcript24982_g1	PREDICTED: transcription factor MYC2-like [Nelumbo nucifera]
LRWT_f4p0_1122_transcript60506_g5	PREDICTED: transcription factor MYB59-like isoform X1 [Nelumbo nucifera]
LRWT_f5p0_1289_transcript53415_g2	PREDICTED: transcription factor MYB59 [Vitis vinifera]
LRWT_f6p0_819_transcript72912_g2	PREDICTED: transcription factor MYB44-like [Nelumbo nucifera]
LRWT_f4p0_901_transcript68489_g2	PREDICTED: transcription factor LAF1-like [Nelumbo nucifera]
LRWT_f10p0_681_transcript78983_g1	PREDICTED: transcription factor HY5 [Ricinus communis]
LRWT_f3p0_1041_transcript63349_g1	PREDICTED: transcription factor HBP-1b(c38)-like [Sesamum indicum]
LRWT_f2p0_1917_transcript31850_g2	PREDICTED: transcription factor HBP-1b(c38)-like [Nelumbo nucifera]
LRWT_f3p0_1231_transcript56281_g1	PREDICTED: transcription factor FER-LIKE IRON DEFICIENCY-INDUCED TRANSCRIPTION FACTOR-like isoform X1 [Nelumbo nucifera]
LRWT_f2p0_1108_transcript61330_g14	PREDICTED: transcription factor FER-LIKE IRON DEFICIENCY-INDUCED TRANSCRIPTION FACTOR [Vitis vinifera]
LRWT_f4p0_2465_transcript21120_g3	PREDICTED: transcription factor bHLH78 [Nelumbo nucifera]
LRWT_f3p0_2411_transcript21967_g1	PREDICTED: transcription factor bHLH36 [Citrus sinensis]
LRWT_f9p0_895_transcript66645_g1	PREDICTED: transcription factor bHLH35-like [Pyrus x bretschneideri]
LRWT_f6p0_1664_transcript40074_g1	PREDICTED: transcription factor bHLH18-like [Phoenix dactylifera]
LRWT_f4p0_1435_transcript48288_g4	PREDICTED: transcription factor bHLH18-like [Elaeis guineensis]
LRWT_f7p0_823_transcript70933_g2	PREDICTED: transcription factor bHLH149-like [Sesamum indicum]
LRWT_f2p0_2271_transcript24211_g2	PREDICTED: transcription factor bHLH118-like [Populus euphratica]
LRWT_f2p0_984_transcript66626_g16	PREDICTED: transcription factor bHLH113-like [Nelumbo nucifera]
LRWT_f3p0_840_transcript72865_g2	PREDICTED: transcription factor bHLH113-like [Nelumbo nucifera]
LRWT_f5p0_837_transcript72942_g3	PREDICTED: transcription elongation factor SPT5 [Nelumbo nucifera]
LRWT_f12p0_2241_transcript24471_g2	PREDICTED: threonine dehydratase biosynthetic, chloroplastic [Phoenix dactylifera]
LRWT_f2p0_728_transcript78953_g14	PREDICTED: thioredoxin-like protein YLS8 [Camelina sativa]
LRWT_f2p0_1524_transcript45312_g15	PREDICTED: thiol protease aleurain [Camelina sativa]
LRWT_f2p0_973_transcript67120_g18	PREDICTED: thaumatin-like protein [Vitis vinifera]
LRWT_f3p0_2384_transcript22557_g2	PREDICTED: sulfate transporter 3.1-like [Nelumbo nucifera]
LRWT_f3p0_2578_transcript18609_g1	PREDICTED: sulfate transporter 1.3-like [Nelumbo nucifera]
LRWT_f3p0_2030_transcript29440_g2	PREDICTED: sucrose transport protein SUC4 [Nelumbo nucifera]
LRWT_f2p0_2979_transcript13718_g2	PREDICTED: sucrose synthase [Nelumbo nucifera]
LRWT_f5p0_2847_transcript15011_g2	PREDICTED: sucrose synthase [Nelumbo nucifera]
LRWT_f2p0_1609_transcript42188_g5	PREDICTED: succinyl-CoA ligase [ADP-forming] subunit beta, mitochondrial [Elaeis guineensis]
LRWT_f5p0_2436_transcript20675_g1	PREDICTED: subtilisin-like protease [Nicotiana sylvestris]
LRWT_f6p0_2454_transcript20389_g1	PREDICTED: subtilisin-like protease [Nicotiana sylvestris]
LRWT_f4p0_2299_transcript23798_g1	PREDICTED: S-type anion channel SLAH2-like isoform X1 [Nelumbo nucifera]
LRWT_f3p0_419_transcript95452_g8	PREDICTED: stress-associated endoplasmic reticulum protein 2-like [Phoenix dactylifera]
LRWT_f7p0_966_transcript63486_g1	PREDICTED: stem-specific protein TSJT1-like [Nelumbo nucifera]
LRWT_f6p0_1057_transcript63147_g3	PREDICTED: stem-specific protein TSJT1 [Populus euphratica]
LRWT_f10p0_1435_transcript47181_g1	PREDICTED: splicing factor U2af small subunit B [Amborella trichopoda]
LRWT_f3p0_1406_transcript49563_g3	PREDICTED: spermine synthase [Jatropha curcas]
LRWT_f2p0_834_transcript73193_g17	PREDICTED: somatic embryogenesis receptor kinase 2 [Solanum tuberosum]
LRWT_f3p0_403_transcript97129_g14	PREDICTED: somatic embryogenesis receptor kinase 2 [Solanum tuberosum]
LRWT_f2p0_819_transcript73929_g11	PREDICTED: somatic embryogenesis receptor kinase 2 [Solanum tuberosum]
LRWT_f12p0_862_transcript70124_g1	PREDICTED: somatic embryogenesis receptor kinase 2 [Ricinus communis]
LRWT_f9p0_1432_transcript47867_g1	PREDICTED: solute carrier family 35 member F1-like isoform X1 [Nelumbo nucifera]
LRWT_f8p0_3818_transcript5287_g1	PREDICTED: sodium/hydrogen exchanger 8 [Nelumbo nucifera]
LRWT_f18p0_874_transcript70751_g1	PREDICTED: S-norcoclaurine synthase-like [Nelumbo nucifera]
LRWT_f8p0_816_transcript72854_g1	PREDICTED: S-norcoclaurine synthase-like [Nelumbo nucifera]
LRWT_f2p0_856_transcript72158_g11	PREDICTED: S-norcoclaurine synthase-like [Nelumbo nucifera]
LRWT_f2p0_1057_transcript63316_g4	PREDICTED: S-norcoclaurine synthase-like [Nelumbo nucifera]
LRWT_f21p0_718_transcript78085_g1	PREDICTED: S-norcoclaurine synthase-like [Nelumbo nucifera]
LRWT_f3p0_1198_transcript58593_g4	PREDICTED: S-norcoclaurine synthase-like [Nelumbo nucifera]
LRWT_f4p0_770_transcript75651_g4	PREDICTED: S-norcoclaurine synthase-like [Nelumbo nucifera]
LRWT_f3p0_1023_transcript65103_g4	PREDICTED: S-norcoclaurine synthase-like [Nelumbo nucifera]
LRWT_f2p0_2444_transcript20113_g1	PREDICTED: SNF1-related protein kinase regulatory subunit gamma-1-like [Phoenix dactylifera]
LRWT_f94p0_1353_transcript48681_g1	PREDICTED: SNAP25 homologous protein SNAP33 [Nicotiana sylvestris]
LRWT_f5p0_819_transcript69959_g1	PREDICTED: small heat shock protein, chloroplastic-like [Nelumbo nucifera]
LRWT_f5p0_868_transcript71299_g1	PREDICTED: small heat shock protein, chloroplastic-like [Nelumbo nucifera]
LRWT_f14p0_838_transcript71998_g2	PREDICTED: slit homolog 2 protein-like isoform X2 [Gossypium raimondii]
LRWT_f3p0_966_transcript67258_g4	PREDICTED: SKP1-like protein 1B [Gossypium raimondii]
LRWT_f6p0_1087_transcript62160_g2	PREDICTED: short-chain type dehydrogenase/reductase-like [Nelumbo nucifera]
LRWT_f2p0_535_transcript90116_g24	PREDICTED: short-chain type dehydrogenase/reductase isoform X3 [Jatropha curcas]
LRWT_f23p0_948_transcript64572_g1	PREDICTED: short-chain dehydrogenase reductase 3b-like [Vitis vinifera]
LRWT_f3p0_946_transcript67998_g3	PREDICTED: short-chain dehydrogenase reductase 3b-like [Vitis vinifera]
LRWT_f5p0_1300_transcript53646_g5	PREDICTED: serine/threonine-protein phosphatase PP1-like [Nelumbo nucifera]
LRWT_f2p0_1543_transcript44817_g15	PREDICTED: serine/threonine-protein kinase SAPK3 [Vitis vinifera]
LRWT_f6p0_3585_transcript6570_g1	PREDICTED: serine/threonine-protein kinase CTR1 [Vitis vinifera]
LRWT_f2p0_1717_transcript38152_g4	PREDICTED: serine/threonine-protein kinase AtPK2/AtPK19-like [Elaeis guineensis]
LRWT_f3p0_1634_transcript41735_g9	PREDICTED: serine/threonine-protein kinase At5g01020 [Nelumbo nucifera]
LRWT_f13p0_1513_transcript45375_g2	PREDICTED: serine/threonine-protein kinase At5g01020 [Nelumbo nucifera]
LRWT_f2p0_962_transcript67344_g7	PREDICTED: serine/arginine-rich SC35-like splicing factor SCL30A isoform X2 [Musa acuminata subsp. malaccensis]
LRWT_f5p0_1821_transcript35067_g2	PREDICTED: scopoletin glucosyltransferase-like [Populus euphratica]
LRWT_f5p0_2409_transcript20946_g1	PREDICTED: scarecrow-like protein 1 [Vitis vinifera]
LRWT_f11p0_1025_transcript63758_g2	PREDICTED: salicylic acid-binding protein 2-like [Prunus mume]
LRWT_f5p0_1526_transcript44342_g1	PREDICTED: S-adenosylmethionine synthase 1 [Ricinus communis]
LRWT_f10p0_2140_transcript25107_g1	PREDICTED: ruBisCO large subunit-binding protein subunit beta, chloroplastic [Vitis vinifera]
LRWT_f7p0_2247_transcript23223_g1	PREDICTED: ruBisCO large subunit-binding protein subunit alpha-like isoform X1 [Nelumbo nucifera]
LRWT_f8p0_647_transcript82426_g2	PREDICTED: RPM1-interacting protein 4 [Vitis vinifera]
LRWT_f7p0_649_transcript82515_g1	PREDICTED: RING-H2 zinc finger protein RHA1a-like [Nelumbo nucifera]
LRWT_f2p0_977_transcript66716_g8	PREDICTED: RING-H2 finger protein ATL79-like [Populus euphratica]
LRWT_f2p0_1742_transcript38666_g13	PREDICTED: RING finger and CHY zinc finger domain-containing protein 1 [Nelumbo nucifera]
LRWT_f137p0_870_transcript69497_g1	PREDICTED: ribonuclease 1-like [Nelumbo nucifera]
LRWT_f2p0_1008_transcript65396_g11	PREDICTED: riboflavin synthase-like [Beta vulgaris subsp. vulgaris]
LRWT_f5p0_484_transcript90579_g3	PREDICTED: respiratory supercomplex factor 2 homolog C1565.01-like [Nelumbo nucifera]
LRWT_f3p0_3130_transcript12282_g3	PREDICTED: respiratory burst oxidase homolog protein C [Nelumbo nucifera]
LRWT_f4p0_2839_transcript15293_g1	PREDICTED: respiratory burst oxidase homolog protein B [Ricinus communis]
LRWT_f2p0_1339_transcript51832_g2	PREDICTED: remorin-like isoform X1 [Nelumbo nucifera]
LRWT_f2p0_2890_transcript14820_g2	PREDICTED: receptor-like serine/threonine-protein kinase SD1-8 [Jatropha curcas]
LRWT_f7p0_2338_transcript21596_g1	PREDICTED: receptor-like serine/threonine-protein kinase NCRK [Nelumbo nucifera]
LRWT_f2p0_2170_transcript26475_g8	PREDICTED: receptor-like serine/threonine-protein kinase At2g45590 [Nelumbo nucifera]
LRWT_f3p0_3890_transcript5126_g1	PREDICTED: receptor-like protein kinase 2 [Nelumbo nucifera]
LRWT_f2p0_1041_transcript63991_g8	PREDICTED: ras-related protein RIC1 [Amborella trichopoda]
LRWT_f15p0_1798_transcript34466_g1	PREDICTED: pyruvate kinase, cytosolic isozyme-like [Elaeis guineensis]
LRWT_f2p0_2120_transcript27467_g9	PREDICTED: pyruvate kinase, cytosolic isozyme-like [Elaeis guineensis]
LRWT_f2p0_1636_transcript41334_g13	PREDICTED: pyruvate dehydrogenase E1 component subunit alpha, mitochondrial [Sesamum indicum]
LRWT_f2p0_2345_transcript23214_g7	PREDICTED: pyruvate decarboxylase 2 [Pyrus x bretschneideri]
LRWT_f2p0_2350_transcript23127_g5	PREDICTED: pyruvate decarboxylase 1 [Erythranthe guttata]
LRWT_f11p0_1348_transcript49086_g1	PREDICTED: pyridoxal 5'-phosphate synthase subunit PDX1.3 [Cicer arietinum]
LRWT_f28p0_1652_transcript37356_g1	PREDICTED: putative UDP-rhamnose:rhamnosyltransferase 1 [Nelumbo nucifera]
LRWT_f2p0_3287_transcript10126_g3	PREDICTED: putative ribonuclease H protein At1g65750 [Prunus mume]
LRWT_f2p0_1067_transcript61686_g1	PREDICTED: putative protein phosphatase 2C-like protein 44 [Ricinus communis]
LRWT_f2p0_1135_transcript60211_g9	PREDICTED: putative pectinesterase/pectinesterase inhibitor 26 [Vitis vinifera]
LRWT_f8p0_3867_transcript4990_g1	PREDICTED: putative multidrug resistance protein [Vitis vinifera]
LRWT_f9p0_1012_transcript62560_g1	PREDICTED: putative methyltransferase DDB_G0268948 [Nelumbo nucifera]
LRWT_f2p0_504_transcript90639_g20	PREDICTED: putative methyltransferase DDB_G0268948 [Nelumbo nucifera]
LRWT_f2p0_1525_transcript45125_g5	PREDICTED: putative methylesterase 14, chloroplastic [Nelumbo nucifera]
LRWT_f2p0_530_transcript89121_g13	PREDICTED: putative lipid-transfer protein DIR1 [Solanum pennellii]
LRWT_f8p0_453_transcript92860_g1	PREDICTED: putative lipid-transfer protein DIR1 [Solanum pennellii]
LRWT_f2p0_585_transcript86133_g5	PREDICTED: putative lipid-transfer protein DIR1 [Nelumbo nucifera]
LRWT_f17p0_860_transcript70526_g1	PREDICTED: putative lipid-binding protein AIR1B [Beta vulgaris subsp. vulgaris]
LRWT_f13p0_1222_transcript55664_g1	PREDICTED: putative glutathione-specific gamma-glutamylcyclotransferase 2 [Fragaria vesca subsp. vesca]
LRWT_f7p0_1113_transcript60424_g1	PREDICTED: putative glutathione-specific gamma-glutamylcyclotransferase 2 [Fragaria vesca subsp. vesca]
LRWT_f5p0_1557_transcript42477_g1	PREDICTED: putative glutamine amidotransferase PB2B2.05 [Nelumbo nucifera]
LRWT_f7p0_929_transcript68746_g1	PREDICTED: putative germin-like protein 2-1 [Vitis vinifera]
LRWT_f2p0_1071_transcript62717_g10	PREDICTED: putative germin-like protein 2-1 [Vitis vinifera]
LRWT_f2p0_934_transcript68560_g8	PREDICTED: putative germin-like protein 2-1 [Vitis vinifera]
LRWT_f2p0_873_transcript71343_g4	PREDICTED: putative germin-like protein 2-1 [Nelumbo nucifera]
LRWT_f14p0_1089_transcript61548_g1	PREDICTED: putative F-box/LRR-repeat protein 23 isoform X2 [Populus euphratica]
LRWT_f2p0_980_transcript66534_g1	PREDICTED: putative F-box/LRR-repeat protein 23 [Nelumbo nucifera]
LRWT_f5p0_1751_transcript36795_g1	PREDICTED: putative DNA-binding protein ESCAROLA, partial [Populus euphratica]
LRWT_f2p0_1781_transcript36463_g4	PREDICTED: putative DNA-binding protein ESCAROLA [Nelumbo nucifera]
LRWT_f2p0_1710_transcript38695_g4	PREDICTED: putative DNA-binding protein ESCAROLA [Nelumbo nucifera]
LRWT_f3p0_1502_transcript46943_g6	PREDICTED: putative DNA-binding protein ESCAROLA [Nelumbo nucifera]
LRWT_f3p0_1418_transcript47925_g1	PREDICTED: putative 12-oxophytodienoate reductase 11 [Vitis vinifera]
LRWT_f2p0_1505_transcript45941_g6	PREDICTED: putative 12-oxophytodienoate reductase 11 [Vitis vinifera]
LRWT_f8p0_1375_transcript49184_g1	PREDICTED: putative 12-oxophytodienoate reductase 11 [Malus domestica]
LRWT_f12p0_1461_transcript47108_g2	PREDICTED: putative 12-oxophytodienoate reductase 11 [Citrus sinensis]
LRWT_f5p0_1361_transcript51077_g3	PREDICTED: purine permease 3-like [Nelumbo nucifera]
LRWT_f9p0_1161_transcript57854_g1	PREDICTED: purine permease 3-like [Nelumbo nucifera]
LRWT_f4p0_1252_transcript55293_g4	PREDICTED: purine permease 3-like [Nelumbo nucifera]
LRWT_f3p0_1318_transcript52922_g4	PREDICTED: purine permease 3-like [Nelumbo nucifera]
LRWT_f17p0_1311_transcript52470_g1	PREDICTED: purine permease 3-like [Nelumbo nucifera]
LRWT_f7p0_1368_transcript50017_g2	PREDICTED: purine permease 1-like [Nelumbo nucifera]
LRWT_f2p0_1434_transcript48462_g10	PREDICTED: PTI1-like tyrosine-protein kinase At3g15890 isoform X2 [Populus euphratica]
LRWT_f3p0_1800_transcript35707_g3	PREDICTED: protein ZINC INDUCED FACILITATOR-LIKE 1-like isoform X2 [Phoenix dactylifera]
LRWT_f72p0_1777_transcript34624_g1	PREDICTED: protein ZINC INDUCED FACILITATOR-LIKE 1-like isoform X2 [Phoenix dactylifera]
LRWT_f14p0_782_transcript74431_g1	PREDICTED: protein YLS9-like [Nelumbo nucifera]
LRWT_f7p0_908_transcript69418_g4	PREDICTED: protein YLS9-like [Nelumbo nucifera]
LRWT_f8p0_842_transcript68916_g2	PREDICTED: protein YLS9-like [Nelumbo nucifera]
LRWT_f4p0_828_transcript72637_g3	PREDICTED: protein YLS9-like [Nelumbo nucifera]
LRWT_f7p0_953_transcript64795_g1	PREDICTED: protein YLS9-like [Nelumbo nucifera]
LRWT_f24p0_960_transcript66853_g2	PREDICTED: protein YLS9 [Vitis vinifera]
LRWT_f2p0_1600_transcript42644_g14	PREDICTED: protein YLS2-like [Nelumbo nucifera]
LRWT_f11p0_1187_transcript57511_g2	PREDICTED: protein YLS2-like [Nelumbo nucifera]
LRWT_f8p0_472_transcript88601_g1	PREDICTED: protein yippee-like At4g27745 [Nelumbo nucifera]
LRWT_f2p0_1406_transcript49403_g3	PREDICTED: protein trichome birefringence-like 38 [Sesamum indicum]
LRWT_f2p0_1199_transcript57735_g10	PREDICTED: protein trichome birefringence-like 37 [Nicotiana sylvestris]
LRWT_f2p0_1321_transcript53299_g13	PREDICTED: protein trichome birefringence-like 14 [Nelumbo nucifera]
LRWT_f4p0_2508_transcript20277_g2	PREDICTED: protein TRANSPARENT TESTA 12-like [Populus euphratica]
LRWT_f6p0_1779_transcript34833_g1	PREDICTED: protein TRANSPARENT TESTA 12-like [Nelumbo nucifera]
LRWT_f3p0_635_transcript83412_g3	PREDICTED: protein TRANSPARENT TESTA 12-like [Jatropha curcas]
LRWT_f3p0_3997_transcript4431_g1	PREDICTED: protein TOPLESS-like isoform X4 [Nelumbo nucifera]
LRWT_f5p0_706_transcript78710_g4	PREDICTED: protein TIFY 9 [Nelumbo nucifera]
LRWT_f4p0_693_transcript79817_g4	PREDICTED: protein TIFY 9 [Nelumbo nucifera]
LRWT_f19p0_1307_transcript50962_g1	PREDICTED: protein TIFY 6B-like [Nelumbo nucifera]
LRWT_f2p0_1468_transcript47202_g6	PREDICTED: protein TIFY 6B-like [Nelumbo nucifera]
LRWT_f2p0_1413_transcript49244_g4	PREDICTED: protein TIFY 6B-like [Nelumbo nucifera]
LRWT_f82p0_968_transcript65043_g1	PREDICTED: protein TIFY 10A-like [Solanum pennellii]
LRWT_f2p0_856_transcript72154_g10	PREDICTED: protein TIFY 10A [Vitis vinifera]
LRWT_f9p0_1175_transcript57294_g2	PREDICTED: protein SULFUR DEFICIENCY-INDUCED 2-like [Gossypium raimondii]
LRWT_f2p0_573_transcript86786_g11	PREDICTED: protein SRG1-like [Fragaria vesca subsp. vesca]
LRWT_f5p0_528_transcript85310_g1	PREDICTED: protein RALF-like 32 isoform X1 [Nicotiana sylvestris]
LRWT_f5p0_508_transcript90210_g2	PREDICTED: protein PSY3 [Ricinus communis]
LRWT_f9p0_1413_transcript47456_g2	PREDICTED: protein PHR1-LIKE 1-like isoform X2 [Nelumbo nucifera]
LRWT_f2p0_2094_transcript28118_g8	PREDICTED: protein PHR1-LIKE 1 [Vitis vinifera]
LRWT_f74p0_896_transcript67233_g1	PREDICTED: protein P21-like [Nelumbo nucifera]
LRWT_f2p0_2060_transcript28779_g12	PREDICTED: protein NRT1/ PTR FAMILY 7.3-like [Nelumbo nucifera]
LRWT_f2p0_2083_transcript28331_g6	PREDICTED: protein NRT1/ PTR FAMILY 5.2-like [Nelumbo nucifera]
LRWT_f11p0_2099_transcript27129_g1	PREDICTED: protein NRT1/ PTR FAMILY 5.2-like [Jatropha curcas]
LRWT_f9p0_832_transcript72221_g2	PREDICTED: protein MIZU-KUSSEI 1 [Vitis vinifera]
LRWT_f2p0_785_transcript74873_g1	PREDICTED: protein LURP-one-related 4 [Vitis vinifera]
LRWT_f2p0_873_transcript71393_g11	PREDICTED: protein LURP-one-related 4 [Vitis vinifera]
LRWT_f2p0_1682_transcript39696_g15	PREDICTED: protein kinase 2B, chloroplastic isoform X1 [Vitis vinifera]
LRWT_f7p0_1546_transcript44064_g2	PREDICTED: protein IWS1 homolog [Sesamum indicum]
LRWT_f2p0_1606_transcript42274_g5	PREDICTED: protein IWS1 homolog [Sesamum indicum]
LRWT_f9p0_815_transcript72900_g1	PREDICTED: protein IWS1 homolog [Sesamum indicum]
LRWT_f7p0_1371_transcript49415_g1	PREDICTED: protein IQ-DOMAIN 1-like [Nelumbo nucifera]
LRWT_f5p0_1783_transcript35497_g1	PREDICTED: protein IQ-DOMAIN 14 [Citrus sinensis]
LRWT_f5p0_1877_transcript33286_g2	PREDICTED: protein HOTHEAD-like [Nelumbo nucifera]
LRWT_f2p0_1544_transcript44751_g7	PREDICTED: protein HOTHEAD-like [Nelumbo nucifera]
LRWT_f2p0_1764_transcript36762_g4	PREDICTED: protein HOTHEAD-like [Nelumbo nucifera]
LRWT_f117p0_1709_transcript32770_g1	PREDICTED: protein HOTHEAD-like [Nelumbo nucifera]
LRWT_f14p0_540_transcript87257_g1	PREDICTED: protein GLUTAMINE DUMPER 1-like [Elaeis guineensis]
LRWT_f2p0_4402_transcript2794_g2	PREDICTED: protein GIGANTEA [Vitis vinifera]
LRWT_f3p0_724_transcript78737_g3	PREDICTED: protein GAMETE EXPRESSED 1 [Nelumbo nucifera]
LRWT_f4p0_1228_transcript56276_g5	PREDICTED: protein EXORDIUM [Vitis vinifera]
LRWT_f12p0_729_transcript77872_g1	PREDICTED: protein ELF4-LIKE 4-like [Nelumbo nucifera]
LRWT_f5p0_1952_transcript30621_g1	PREDICTED: protein disulfide-isomerase [Nelumbo nucifera]
LRWT_f2p0_886_transcript71812_g26	PREDICTED: protein BOBBER 2-like [Nicotiana tomentosiformis]
LRWT_f2p0_1787_transcript36135_g6	PREDICTED: protein ASPARTIC PROTEASE IN GUARD CELL 2-like [Nelumbo nucifera]
LRWT_f3p0_1635_transcript41290_g4	PREDICTED: protein ASPARTIC PROTEASE IN GUARD CELL 1 [Ricinus communis]
LRWT_f3p0_1496_transcript46170_g1	PREDICTED: protein ABIL2 isoform X1 [Nelumbo nucifera]
LRWT_f2p0_800_transcript74196_g2	PREDICTED: proline-rich protein 3 [Ricinus communis]
LRWT_f6p0_766_transcript76766_g3	PREDICTED: proline-rich protein 3 [Ricinus communis]
LRWT_f12p0_1861_transcript33271_g1	PREDICTED: proline dehydrogenase 2, mitochondrial-like [Nelumbo nucifera]
LRWT_f5p0_1218_transcript56500_g1	PREDICTED: probable xyloglucan endotransglucosylase/hydrolase protein 32 isoform X1 [Nelumbo nucifera]
LRWT_f9p0_1210_transcript56458_g1	PREDICTED: probable xyloglucan endotransglucosylase/hydrolase protein 32 [Vitis vinifera]
LRWT_f2p0_995_transcript65964_g11	PREDICTED: probable xyloglucan endotransglucosylase/hydrolase protein 26 [Eucalyptus grandis]
LRWT_f14p0_1023_transcript64629_g1	PREDICTED: probable xyloglucan endotransglucosylase/hydrolase protein 23 [Nelumbo nucifera]
LRWT_f2p0_1123_transcript60627_g4	PREDICTED: probable xyloglucan endotransglucosylase/hydrolase [Eucalyptus grandis]
LRWT_f2p0_1967_transcript31132_g11	PREDICTED: probable WRKY transcription factor 72 isoform X2 [Nelumbo nucifera]
LRWT_f2p0_1185_transcript58266_g7	PREDICTED: probable WRKY transcription factor 71 [Nelumbo nucifera]
LRWT_f3p0_1267_transcript55218_g9	PREDICTED: probable WRKY transcription factor 65 isoform X2 [Nelumbo nucifera]
LRWT_f2p0_1991_transcript31001_g14	PREDICTED: probable WRKY transcription factor 31 [Nelumbo nucifera]
LRWT_f2p0_1881_transcript33416_g8	PREDICTED: probable WRKY transcription factor 14 [Vitis vinifera]
LRWT_f10p0_1016_transcript63867_g1	PREDICTED: probable strigolactone esterase D14 [Nelumbo nucifera]
LRWT_f2p0_2613_transcript18824_g7	PREDICTED: probable serine/threonine-protein kinase WNK4 [Nelumbo nucifera]
LRWT_f10p0_1538_transcript42584_g1	PREDICTED: probable serine/threonine-protein kinase NAK [Nelumbo nucifera]
LRWT_f4p0_2203_transcript24653_g2	PREDICTED: probable serine/threonine-protein kinase At1g18390 [Jatropha curcas]
LRWT_f25p0_1076_transcript61558_g1	PREDICTED: probable rhamnose biosynthetic enzyme 1 [Nelumbo nucifera]
LRWT_f2p0_1712_transcript39577_g17	PREDICTED: probable receptor-like protein kinase At5g47070 isoform X1 [Nelumbo nucifera]
LRWT_f21p0_1616_transcript40058_g1	PREDICTED: probable purple acid phosphatase 20 [Eucalyptus grandis]
LRWT_f4p0_1322_transcript50801_g1	PREDICTED: probable protein phosphatase 2C 75 [Ricinus communis]
LRWT_f10p0_1403_transcript49030_g2	PREDICTED: probable protein phosphatase 2C 60 [Jatropha curcas]
LRWT_f3p0_1374_transcript50686_g3	PREDICTED: probable protein phosphatase 2C 59 isoform X2 [Nelumbo nucifera]
LRWT_f3p0_1058_transcript63468_g8	PREDICTED: probable protein phosphatase 2C 39 [Nelumbo nucifera]
LRWT_f3p0_1910_transcript32534_g1	PREDICTED: probable polyamine oxidase 4 [Nelumbo nucifera]
LRWT_f14p0_1981_transcript29689_g1	PREDICTED: probable polyamine oxidase 2 [Nelumbo nucifera]
LRWT_f3p0_926_transcript68704_g2	PREDICTED: probable phospholipid hydroperoxide glutathione peroxidase [Gossypium raimondii]
LRWT_f2p0_1280_transcript54410_g8	PREDICTED: probable peroxidase 61 [Nelumbo nucifera]
LRWT_f2p0_1735_transcript37656_g2	PREDICTED: probable pectinesterase/pectinesterase inhibitor 7 [Vigna radiata var. radiata]
LRWT_f2p0_820_transcript74558_g26	PREDICTED: probable pectinesterase/pectinesterase inhibitor 46 [Fragaria vesca subsp. vesca]
LRWT_f2p0_1880_transcript32782_g1	PREDICTED: probable pectinesterase/pectinesterase inhibitor 41 [Nelumbo nucifera]
LRWT_f2p0_1814_transcript35297_g5	PREDICTED: probable pectinesterase/pectinesterase inhibitor 41 [Nelumbo nucifera]
LRWT_f13p0_1767_transcript34875_g1	PREDICTED: probable pectinesterase/pectinesterase inhibitor 12 [Sesamum indicum]
LRWT_f7p0_1868_transcript32960_g1	PREDICTED: probable mitochondrial-processing peptidase subunit beta [Nelumbo nucifera]
LRWT_f2p0_2587_transcript19465_g2	PREDICTED: probable methyltransferase PMT20 [Vitis vinifera]
LRWT_f3p0_2327_transcript23509_g1	PREDICTED: probable mediator of RNA polymerase II transcription subunit 37e [Jatropha curcas]
LRWT_f2p0_1353_transcript51605_g11	PREDICTED: probable mannitol dehydrogenase isoform X2 [Vitis vinifera]
LRWT_f3p0_1220_transcript56804_g5	PREDICTED: probable mannitol dehydrogenase isoform X2 [Vitis vinifera]
LRWT_f6p0_1332_transcript52100_g2	PREDICTED: probable mannitol dehydrogenase isoform X2 [Vitis vinifera]
LRWT_f5p0_1587_transcript42910_g2	PREDICTED: probable mannitol dehydrogenase isoform X2 [Vitis vinifera]
LRWT_f8p0_1188_transcript57043_g3	PREDICTED: probable mannitol dehydrogenase [Vitis vinifera]
LRWT_f2p0_3659_transcript6682_g2	PREDICTED: probable LRR receptor-like serine/threonine-protein kinase At4g26540 [Vitis vinifera]
LRWT_f2p0_3184_transcript11311_g3	PREDICTED: probable LRR receptor-like serine/threonine-protein kinase At3g47570 [Nelumbo nucifera]
LRWT_f3p0_3180_transcript11298_g2	PREDICTED: probable LRR receptor-like serine/threonine-protein kinase At3g47570 [Nelumbo nucifera]
LRWT_f8p0_3481_transcript7589_g1	PREDICTED: probable LRR receptor-like serine/threonine-protein kinase At1g53440 isoform X1 [Nelumbo nucifera]
LRWT_f2p0_3614_transcript7180_g2	PREDICTED: probable leucine-rich repeat receptor-like protein kinase At5g49770 [Gossypium raimondii]
LRWT_f2p0_990_transcript66159_g7	PREDICTED: probable inactive receptor kinase At1g27190 [Nelumbo nucifera]
LRWT_f3p0_2166_transcript26528_g3	PREDICTED: probable inactive purple acid phosphatase 27 [Cicer arietinum]
LRWT_f15p0_1576_transcript40360_g1	PREDICTED: probable inactive poly [ADP-ribose] polymerase SRO2 [Nelumbo nucifera]
LRWT_f45p0_1627_transcript38415_g1	PREDICTED: probable glycosyltransferase At5g20260 isoform X1 [Nelumbo nucifera]
LRWT_f3p0_2252_transcript25613_g5	PREDICTED: probable glycosyltransferase At3g07620 [Nelumbo nucifera]
LRWT_f2p0_869_transcript71634_g7	PREDICTED: probable glutathione S-transferase isoform X1 [Populus euphratica]
LRWT_f3p0_972_transcript66692_g2	PREDICTED: probable glutathione S-transferase [Nelumbo nucifera]
LRWT_f3p0_1375_transcript50850_g7	PREDICTED: probable galacturonosyltransferase-like 1 [Gossypium raimondii]
LRWT_f48p0_2715_transcript14819_g1	PREDICTED: probable galactinol--sucrose galactosyltransferase 2 isoform X1 [Nelumbo nucifera]
LRWT_f3p0_1787_transcript36095_g3	PREDICTED: probable flavin-containing monooxygenase 1 isoform X1 [Nelumbo nucifera]
LRWT_f2p0_1037_transcript65227_g16	PREDICTED: probable flavin-containing monooxygenase 1 isoform X1 [Nelumbo nucifera]
LRWT_f2p0_1790_transcript33555_g1	PREDICTED: probable flavin-containing monooxygenase 1 [Nelumbo nucifera]
LRWT_f3p0_1534_transcript44447_g2	PREDICTED: probable F-box protein At1g60180 [Nelumbo nucifera]
LRWT_f6p0_1453_transcript47506_g4	PREDICTED: probable F-box protein At1g60180 [Nelumbo nucifera]
LRWT_f5p0_897_transcript69777_g3	PREDICTED: probable E3 ubiquitin-protein ligase XERICO [Solanum tuberosum]
LRWT_f2p0_1393_transcript49993_g7	PREDICTED: probable E3 ubiquitin-protein ligase BAH1-like 2 [Nelumbo nucifera]
LRWT_f4p0_1338_transcript51951_g5	PREDICTED: probable choline kinase 1 isoform X2 [Nelumbo nucifera]
LRWT_f2p0_981_transcript69483_g21	PREDICTED: probable choline kinase 1 isoform X1 [Pyrus x bretschneideri]
LRWT_f4p0_1075_transcript62536_g3	PREDICTED: probable carboxylesterase 2 [Nelumbo nucifera]
LRWT_f3p0_1509_transcript45710_g3	PREDICTED: probable carboxylesterase 2 [Nelumbo nucifera]
LRWT_f2p0_1291_transcript54569_g13	PREDICTED: probable carboxylesterase 18 [Nelumbo nucifera]
LRWT_f2p0_1231_transcript56350_g4	PREDICTED: probable calcium-binding protein CML49 [Prunus mume]
LRWT_f5p0_699_transcript79061_g3	PREDICTED: probable calcium-binding protein CML11 [Cicer arietinum]
LRWT_f3p0_3689_transcript6426_g3	PREDICTED: probable boron transporter 2 [Populus euphratica]
LRWT_f2p0_3828_transcript4923_g1	PREDICTED: probable boron transporter 2 [Nelumbo nucifera]
LRWT_f4p0_1619_transcript41823_g3	PREDICTED: probable auxin efflux carrier component 1c [Cicer arietinum]
LRWT_f2p0_974_transcript66869_g4	PREDICTED: probable aquaporin TIP-type RB7-5A [Nelumbo nucifera]
LRWT_f4p0_1080_transcript62171_g4	PREDICTED: probable aquaporin TIP2-1 [Musa acuminata subsp. malaccensis]
LRWT_f121p0_1063_transcript61732_g1	PREDICTED: probable aquaporin TIP2-1 [Musa acuminata subsp. malaccensis]
LRWT_f4p0_1051_transcript63600_g5	PREDICTED: probable aquaporin TIP2-1 [Musa acuminata subsp. malaccensis]
LRWT_f3p0_1118_transcript60811_g3	PREDICTED: probable aquaporin TIP2-1 [Musa acuminata subsp. malaccensis]
LRWT_f3p0_1178_transcript58960_g4	PREDICTED: probable aquaporin NIP5-1 [Vitis vinifera]
LRWT_f4p0_1896_transcript32780_g4	PREDICTED: probable anion transporter 3, chloroplastic [Nelumbo nucifera]
LRWT_f16p0_1776_transcript34151_g1	PREDICTED: probable anion transporter 3, chloroplastic [Nelumbo nucifera]
LRWT_f2p0_1629_transcript41466_g3	PREDICTED: probable amino acid permease 7 isoform X2 [Nelumbo nucifera]
LRWT_f4p0_2119_transcript27294_g3	PREDICTED: probable allantoinase 1 [Malus domestica]
LRWT_f8p0_1277_transcript53772_g1	PREDICTED: probable aldo-keto reductase 2 [Vitis vinifera]
LRWT_f3p0_1362_transcript51164_g5	PREDICTED: probable aldo-keto reductase 2 [Populus euphratica]
LRWT_f2p0_2247_transcript24433_g1	PREDICTED: probable aldehyde dehydrogenase [Nelumbo nucifera]
LRWT_f3p0_1330_transcript52688_g5	PREDICTED: probable adenylate kinase 1, chloroplastic [Nelumbo nucifera]
LRWT_f2p0_910_transcript70100_g21	PREDICTED: probable 6-phosphogluconolactonase 4, chloroplastic isoform X2 [Nelumbo nucifera]
LRWT_f16p0_1131_transcript59503_g1	PREDICTED: probable 2-oxoglutarate-dependent dioxygenase AOP1 [Populus euphratica]
LRWT_f4p0_1251_transcript55508_g4	PREDICTED: probable 2-oxoglutarate-dependent dioxygenase AOP1 [Populus euphratica]
LRWT_f4p0_1177_transcript58361_g4	PREDICTED: probable 2-oxoglutarate-dependent dioxygenase AOP1 [Populus euphratica]
LRWT_f2p0_1387_transcript50229_g5	PREDICTED: probable 2-oxoglutarate/Fe(II)-dependent dioxygenase [Vitis vinifera]
LRWT_f2p0_1414_transcript48873_g3	PREDICTED: probable 1-acylglycerol-3-phosphate O-acyltransferase [Nelumbo nucifera]
LRWT_f5p0_2316_transcript23610_g2	PREDICTED: primary amine oxidase-like [Vitis vinifera]
LRWT_f4p0_2743_transcript16360_g1	PREDICTED: potassium transporter 5 [Vitis vinifera]
LRWT_f2p0_2781_transcript16276_g2	PREDICTED: potassium channel AKT1-like [Nelumbo nucifera]
LRWT_f6p0_1744_transcript36963_g1	PREDICTED: polyubiquitin-like isoform X1 [Nicotiana tomentosiformis]
LRWT_f5p0_842_transcript72797_g2	PREDICTED: polyphenol oxidase, chloroplastic-like [Elaeis guineensis]
LRWT_f30p0_1895_transcript32178_g1	PREDICTED: polyol transporter 5-like [Fragaria vesca subsp. vesca]
LRWT_f2p0_1881_transcript30953_g1	PREDICTED: polygalacturonase At1g48100 [Vitis vinifera]
LRWT_f2p0_1710_transcript38770_g9	PREDICTED: polyamine oxidase-like isoform X2 [Nelumbo nucifera]
LRWT_f8p0_1576_transcript43153_g1	PREDICTED: polyamine oxidase [Vitis vinifera]
LRWT_f3p0_703_transcript79740_g1	PREDICTED: polyadenylate-binding protein-interacting protein 2-like [Nelumbo nucifera]
LRWT_f9p0_685_transcript78717_g2	PREDICTED: polyadenylate-binding protein-interacting protein 2-like [Nelumbo nucifera]
LRWT_f2p0_1057_transcript63321_g7	PREDICTED: polyadenylate-binding protein 2-like isoform X1 [Phoenix dactylifera]
LRWT_f2p0_2091_transcript28693_g10	PREDICTED: polyadenylate-binding protein 2 [Amborella trichopoda]
LRWT_f2p0_2443_transcript21447_g3	PREDICTED: polyadenylate-binding protein 2 [Amborella trichopoda]
LRWT_f2p0_1302_transcript53989_g14	PREDICTED: pollen-specific leucine-rich repeat extensin-like protein 2 [Vitis vinifera]
LRWT_f4p0_4511_transcript2464_g1	PREDICTED: pleiotropic drug resistance protein 3-like isoform X1 [Nelumbo nucifera]
LRWT_f3p0_4885_transcript1704_g1	PREDICTED: pleiotropic drug resistance protein 1-like [Nelumbo nucifera]
LRWT_f3p0_4791_transcript1904_g1	PREDICTED: pleiotropic drug resistance protein 1-like [Nelumbo nucifera]
LRWT_f2p0_1078_transcript62397_g5	PREDICTED: pleiotropic drug resistance protein 1-like [Nelumbo nucifera]
LRWT_f3p0_4710_transcript2026_g1	PREDICTED: pleiotropic drug resistance protein 1-like [Nelumbo nucifera]
LRWT_f2p0_1774_transcript37466_g14	PREDICTED: plasminogen activator inhibitor 1 RNA-binding protein [Nelumbo nucifera]
LRWT_f7p0_701_transcript79731_g1	PREDICTED: pistil-specific extensin-like protein [Vitis vinifera]
LRWT_f3p0_700_transcript80209_g9	PREDICTED: pistil-specific extensin-like protein [Prunus mume]
LRWT_f2p0_734_transcript78098_g1	PREDICTED: pistil-specific extensin-like protein [Nelumbo nucifera]
LRWT_f3p0_1180_transcript58817_g7	PREDICTED: pirin-like protein [Erythranthe guttata]
LRWT_f3p0_1589_transcript43633_g5	PREDICTED: PI-PLC X domain-containing protein At5g67130-like [Phoenix dactylifera]
LRWT_f7p0_2012_transcript29797_g1	PREDICTED: phosphomethylethanolamine N-methyltransferase [Vitis vinifera]
LRWT_f3p0_3968_transcript4606_g1	PREDICTED: phospholipase D gamma 1-like [Nelumbo nucifera]
LRWT_f4p0_2822_transcript15662_g2	PREDICTED: phospholipase D alpha 1 [Elaeis guineensis]
LRWT_f2p0_1737_transcript37730_g5	PREDICTED: phospholipase A1-Igamma1, chloroplastic-like isoform X1 [Nelumbo nucifera]
LRWT_f2p0_2095_transcript24574_g1	PREDICTED: phosphatidylinositol/phosphatidylcholine transfer protein SFH3-like [Fragaria vesca subsp. vesca]
LRWT_f4p0_2747_transcript16338_g1	PREDICTED: phosphate transporter PHO1-like [Nelumbo nucifera]
LRWT_f2p0_2791_transcript16061_g2	PREDICTED: phosphate transporter PHO1-like [Nelumbo nucifera]
LRWT_f3p0_2303_transcript23920_g1	PREDICTED: phenylalanine ammonia-lyase [Jatropha curcas]
LRWT_f4p0_1025_transcript63438_g1	PREDICTED: phenolic glucoside malonyltransferase 1-like [Prunus mume]
LRWT_f7p0_1680_transcript38659_g2	PREDICTED: phenolic glucoside malonyltransferase 1-like [Nelumbo nucifera]
LRWT_f13p0_1494_transcript45428_g1	PREDICTED: phenolic glucoside malonyltransferase 1-like [Nelumbo nucifera]
LRWT_f5p0_1596_transcript42505_g3	PREDICTED: phenolic glucoside malonyltransferase 1-like [Nelumbo nucifera]
LRWT_f4p0_1166_transcript57143_g1	PREDICTED: phenazine biosynthesis-like domain-containing protein 1 isoform X1 [Nelumbo nucifera]
LRWT_f2p0_1444_transcript48111_g12	PREDICTED: peroxisome biogenesis protein 16 [Nelumbo nucifera]
LRWT_f2p0_1494_transcript46256_g4	PREDICTED: peroxisome biogenesis protein 16 [Nelumbo nucifera]
LRWT_f7p0_1403_transcript48330_g1	PREDICTED: peroxisomal nicotinamide adenine dinucleotide carrier-like isoform X1 [Nelumbo nucifera]
LRWT_f172p0_2459_transcript19759_g1	PREDICTED: peroxisomal fatty acid beta-oxidation multifunctional protein AIM1 [Nelumbo nucifera]
LRWT_f3p0_2315_transcript23626_g1	PREDICTED: peroxisomal acyl-coenzyme A oxidase 1-like [Nelumbo nucifera]
LRWT_f2p0_991_transcript66625_g15	PREDICTED: peroxiredoxin-2F, mitochondrial [Nelumbo nucifera]
LRWT_f3p0_1176_transcript57124_g2	PREDICTED: peroxidase P7-like [Solanum pennellii]
LRWT_f3p0_1323_transcript56603_g14	PREDICTED: peroxidase P7 [Vitis vinifera]
LRWT_f8p0_1156_transcript55874_g1	PREDICTED: peroxidase N1-like [Nelumbo nucifera]
LRWT_f11p0_1208_transcript56605_g2	PREDICTED: peroxidase 72-like [Nelumbo nucifera]
LRWT_f14p0_1200_transcript56671_g1	PREDICTED: peroxidase 72-like [Nelumbo nucifera]
LRWT_f4p0_1108_transcript61148_g3	PREDICTED: peroxidase 72 [Populus euphratica]
LRWT_f4p0_1155_transcript59006_g2	PREDICTED: peroxidase 64 [Vitis vinifera]
LRWT_f2p0_1181_transcript58460_g6	PREDICTED: peroxidase 5-like [Jatropha curcas]
LRWT_f2p0_1198_transcript57760_g7	PREDICTED: peroxidase 5-like [Jatropha curcas]
LRWT_f3p0_1158_transcript59507_g8	PREDICTED: peroxidase 5-like [Jatropha curcas]
LRWT_f3p0_1139_transcript61044_g12	PREDICTED: peroxidase 5-like [Eucalyptus grandis]
LRWT_f2p0_1208_transcript57303_g3	PREDICTED: peroxidase 55-like [Nelumbo nucifera]
LRWT_f28p0_1125_transcript57253_g1	PREDICTED: peroxidase 4-like [Nelumbo nucifera]
LRWT_f3p0_1210_transcript57148_g3	PREDICTED: peroxidase 21 [Vitis vinifera]
LRWT_f15p0_1288_transcript53447_g1	PREDICTED: peroxidase 12-like [Nelumbo nucifera]
LRWT_f2p0_1266_transcript54032_g1	PREDICTED: peroxidase 12-like [Nelumbo nucifera]
LRWT_f4p0_1320_transcript49792_g1	PREDICTED: peroxidase 12-like [Nelumbo nucifera]
LRWT_f3p0_1172_transcript58698_g1	PREDICTED: peroxidase 12-like [Nelumbo nucifera]
LRWT_f19p0_1120_transcript59414_g1	PREDICTED: peroxidase 10-like [Nicotiana tomentosiformis]
LRWT_f6p0_2025_transcript27808_g1	PREDICTED: peptidyl-prolyl cis-trans isomerase FKBP62-like isoform X2 [Nelumbo nucifera]
LRWT_f2p0_2315_transcript23713_g3	PREDICTED: peptidyl-prolyl cis-trans isomerase FKBP62-like [Gossypium raimondii]
LRWT_f4p0_1984_transcript30343_g1	PREDICTED: pectinesterase-like [Nelumbo nucifera]
LRWT_f172p0_1868_transcript32134_g1	PREDICTED: pectinesterase-like [Nelumbo nucifera]
LRWT_f2p0_2209_transcript23715_g1	PREDICTED: pectinesterase-like [Nelumbo nucifera]
LRWT_f4p0_1855_transcript34055_g6	PREDICTED: pectinesterase-like [Nelumbo nucifera]
LRWT_f5p0_1745_transcript34990_g1	PREDICTED: pectinesterase 2 [Ricinus communis]
LRWT_f45p0_1724_transcript37167_g1	PREDICTED: pectinesterase 2 [Ricinus communis]
LRWT_f6p0_1912_transcript32045_g2	PREDICTED: pectinesterase [Populus euphratica]
LRWT_f3p0_915_transcript69387_g3	PREDICTED: pathogen-related protein-like isoform X1 [Nelumbo nucifera]
LRWT_f2p0_1025_transcript64682_g6	PREDICTED: pathogen-related protein-like isoform X1 [Nelumbo nucifera]
LRWT_f12p0_641_transcript79160_g1	PREDICTED: pathogen-related protein-like isoform X1 [Nelumbo nucifera]
LRWT_f50p0_848_transcript70506_g1	PREDICTED: pathogen-related protein-like [Nelumbo nucifera]
LRWT_f5p0_1124_transcript59014_g1	PREDICTED: pathogen-related protein-like [Nelumbo nucifera]
LRWT_f3p0_838_transcript73022_g3	PREDICTED: pathogenesis-related protein STH-21-like [Nelumbo nucifera]
LRWT_f11p0_674_transcript79709_g1	PREDICTED: pathogenesis-related protein STH-21-like [Nelumbo nucifera]
LRWT_f6p0_687_transcript79835_g3	PREDICTED: pathogenesis-related protein STH-21-like [Nelumbo nucifera]
LRWT_f36p0_740_transcript75537_g1	PREDICTED: pathogenesis-related protein STH-21-like [Nelumbo nucifera]
LRWT_f176p0_782_transcript73009_g1	PREDICTED: pathogenesis-related protein STH-21-like [Nelumbo nucifera]
LRWT_f11p0_766_transcript76416_g1	PREDICTED: pathogenesis-related protein STH-21-like [Nelumbo nucifera]
LRWT_f7p0_654_transcript81357_g1	PREDICTED: pathogenesis-related protein STH-21-like [Nelumbo nucifera]
LRWT_f7p0_794_transcript74993_g2	PREDICTED: pathogenesis-related protein PRB1-3-like [Elaeis guineensis]
LRWT_f172p0_714_transcript75235_g1	PREDICTED: pathogenesis-related protein PR-4-like [Populus euphratica]
LRWT_f10p0_788_transcript75104_g1	PREDICTED: pathogenesis-related protein 1-like [Musa acuminata subsp. malaccensis]
LRWT_f2p0_465_transcript92484_g2	PREDICTED: pathogenesis-related protein 1-like [Musa acuminata subsp. malaccensis]
LRWT_f3p0_937_transcript68384_g3	PREDICTED: pathogenesis-related protein 1-like [Elaeis guineensis]
LRWT_f5p0_807_transcript74522_g2	PREDICTED: pathogenesis-related protein 1-like [Elaeis guineensis]
LRWT_f4p0_799_transcript73352_g2	PREDICTED: pathogenesis-related leaf protein 6-like [Nelumbo nucifera]
LRWT_f2p0_1628_transcript41615_g8	PREDICTED: patatin-like protein 7 [Nelumbo nucifera]
LRWT_f4p0_1502_transcript45982_g4	PREDICTED: patatin-like protein 7 [Nelumbo nucifera]
LRWT_f3p0_1925_transcript32132_g2	PREDICTED: patatin-like protein 6 [Vitis vinifera]
LRWT_f2p0_2192_transcript26049_g4	PREDICTED: oxalate--CoA ligase-like [Vitis vinifera]
LRWT_f2p0_1953_transcript31331_g4	PREDICTED: oxalate--CoA ligase-like [Vitis vinifera]
LRWT_f43p0_902_transcript65419_g1	PREDICTED: ovarian cancer-associated gene 2 protein homolog [Nelumbo nucifera]
LRWT_f4p0_764_transcript75922_g1	PREDICTED: organ-specific protein S2-like [Sesamum indicum]
LRWT_f33p0_1255_transcript54363_g1	PREDICTED: organ-specific protein S2-like [Sesamum indicum]
LRWT_f5p0_766_transcript75938_g2	PREDICTED: organ-specific protein S2-like [Sesamum indicum]
LRWT_f21p0_957_transcript66616_g1	PREDICTED: organ-specific protein S2-like [Sesamum indicum]
LRWT_f2p0_1486_transcript46558_g10	PREDICTED: organ-specific protein S2-like [Sesamum indicum]
LRWT_f3p0_773_transcript75620_g1	PREDICTED: organ-specific protein S2-like [Sesamum indicum]
LRWT_f3p0_761_transcript76851_g7	PREDICTED: organ-specific protein S2-like [Sesamum indicum]
LRWT_f5p0_690_transcript79473_g2	PREDICTED: organ-specific protein S2-like [Sesamum indicum]
LRWT_f3p0_610_transcript84801_g4	PREDICTED: organ-specific protein S2-like [Sesamum indicum]
LRWT_f2p0_1890_transcript33128_g7	PREDICTED: organic cation/carnitine transporter 1 [Nelumbo nucifera]
LRWT_f6p0_2569_transcript19159_g3	PREDICTED: oligopeptide transporter 1-like [Prunus mume]
LRWT_f10p0_719_transcript78598_g2	PREDICTED: oleosin 5 isoform X1 [Tarenaya hassleriana]
LRWT_f13p0_848_transcript72392_g1	PREDICTED: oleosin 21.2 kDa-like [Tarenaya hassleriana]
LRWT_f2p0_1679_transcript39441_g1	PREDICTED: O-acyltransferase WSD1-like isoform X1 [Nelumbo nucifera]
LRWT_f4p0_996_transcript64167_g1	PREDICTED: nudix hydrolase 18, mitochondrial [Cucumis sativus]
LRWT_f2p0_1660_transcript40819_g14	PREDICTED: nuclear transcription factor Y subunit A-3-like isoform X1 [Nelumbo nucifera]
LRWT_f3p0_1853_transcript34166_g4	PREDICTED: nuclear transcription factor Y subunit A-10-like isoform X2 [Nelumbo nucifera]
LRWT_f2p0_734_transcript78214_g12	PREDICTED: non-symbiotic hemoglobin 2-like [Nelumbo nucifera]
LRWT_f8p0_2247_transcript24869_g1	PREDICTED: non-symbiotic hemoglobin 2-like [Nelumbo nucifera]
LRWT_f2p0_1362_transcript51082_g2	PREDICTED: non-symbiotic hemoglobin 2-like [Nelumbo nucifera]
LRWT_f5p0_703_transcript79772_g4	PREDICTED: non-symbiotic hemoglobin 2-like [Nelumbo nucifera]
LRWT_f5p0_1797_transcript34712_g1	PREDICTED: non-specific phospholipase C3-like isoform X1 [Vitis vinifera]
LRWT_f2p0_1222_transcript56693_g4	PREDICTED: non-functional NADPH-dependent codeinone reductase 2-like [Phoenix dactylifera]
LRWT_f3p0_653_transcript83131_g6	PREDICTED: non-functional NADPH-dependent codeinone reductase 2-like [Gossypium raimondii]
LRWT_f4p0_1335_transcript51737_g3	PREDICTED: non-functional NADPH-dependent codeinone reductase 2-like [Eucalyptus grandis]
LRWT_f3p0_937_transcript68416_g5	PREDICTED: nicotinamidase 1-like [Solanum tuberosum]
LRWT_f3p0_1291_transcript53650_g2	PREDICTED: nicotianamine synthase [Vitis vinifera]
LRWT_f5p0_962_transcript65561_g1	PREDICTED: NEP1-interacting protein-like 1 [Ricinus communis]
LRWT_f3p0_928_transcript69863_g6	PREDICTED: NADPH:quinone oxidoreductase-like [Nelumbo nucifera]
LRWT_f3p0_877_transcript70668_g2	PREDICTED: NADPH:quinone oxidoreductase-like [Nelumbo nucifera]
LRWT_f10p0_1104_transcript60308_g1	PREDICTED: NADPH:quinone oxidoreductase-like [Jatropha curcas]
LRWT_f6p0_988_transcript65064_g1	PREDICTED: NAC transcription factor 25-like [Nelumbo nucifera]
LRWT_f13p0_1039_transcript63083_g1	PREDICTED: NAC domain-containing protein 68-like [Nelumbo nucifera]
LRWT_f14p0_1223_transcript55438_g1	PREDICTED: NAC domain-containing protein 68-like [Nelumbo nucifera]
LRWT_f9p0_1076_transcript62146_g1	PREDICTED: myb-related protein Myb4 [Nelumbo nucifera]
LRWT_f6p0_1035_transcript64144_g2	PREDICTED: myb-related protein 315-like [Nelumbo nucifera]
LRWT_f4p0_1881_transcript31913_g1	PREDICTED: monoterpene synthase [Ricinus communis]
LRWT_f2p0_2809_transcript15885_g1	PREDICTED: monosaccharide-sensing protein 2 isoform X1 [Nelumbo nucifera]
LRWT_f3p0_2312_transcript23213_g1	PREDICTED: monocopper oxidase-like protein SKU5 [Nelumbo nucifera]
LRWT_f3p0_1542_transcript44850_g7	PREDICTED: molybdate transporter 2 [Nelumbo nucifera]
LRWT_f5p0_689_transcript79619_g1	PREDICTED: MLP-like protein 43 [Vitis vinifera]
LRWT_f2p0_779_transcript75362_g1	PREDICTED: MLP-like protein 43 [Vitis vinifera]
LRWT_f2p0_583_transcript86289_g12	PREDICTED: MLP-like protein 43 [Vitis vinifera]
LRWT_f2p0_475_transcript92114_g11	PREDICTED: MLP-like protein 43 [Vitis vinifera]
LRWT_f2p0_790_transcript76462_g20	PREDICTED: MLP-like protein 43 [Vitis vinifera]
LRWT_f10p0_1501_transcript45267_g2	PREDICTED: MLP-like protein 43 [Vitis vinifera]
LRWT_f16p0_743_transcript76228_g1	PREDICTED: MLP-like protein 43 [Vitis vinifera]
LRWT_f16p0_678_transcript80258_g2	PREDICTED: MLP-like protein 31 [Fragaria vesca subsp. vesca]
LRWT_f49p0_710_transcript76651_g1	PREDICTED: MLP-like protein 31 [Cucumis sativus]
LRWT_f3p0_1972_transcript31611_g3	PREDICTED: MLO-like protein 6 [Sesamum indicum]
LRWT_f2p0_2039_transcript24165_g1	PREDICTED: MLO-like protein 6 [Sesamum indicum]
LRWT_f22p0_1597_transcript40593_g1	PREDICTED: mitochondrial uncoupling protein 5 [Jatropha curcas]
LRWT_f8p0_571_transcript84222_g2	PREDICTED: mitochondrial import inner membrane translocase subunit TIM14-3-like [Sesamum indicum]
LRWT_f2p0_1717_transcript38482_g10	PREDICTED: mitochondrial chaperone BCS1-like [Nelumbo nucifera]
LRWT_f2p0_753_transcript77215_g4	PREDICTED: microsomal glutathione S-transferase 3-like [Setaria italica]
LRWT_f3p0_864_transcript71749_g2	PREDICTED: microsomal glutathione S-transferase 3-like [Setaria italica]
LRWT_f3p0_774_transcript76376_g8	PREDICTED: microsomal glutathione S-transferase 3-like [Setaria italica]
LRWT_f28p0_737_transcript74267_g1	PREDICTED: microsomal glutathione S-transferase 3-like [Setaria italica]
LRWT_f7p0_1278_transcript53006_g1	PREDICTED: methyl-CpG-binding domain-containing protein 6-like isoform X1 [Brassica oleracea var. oleracea]
LRWT_f2p0_2789_transcript16215_g4	PREDICTED: metal-nicotianamine transporter YSL3-like [Nelumbo nucifera]
LRWT_f2p0_2942_transcript14168_g5	PREDICTED: metal-nicotianamine transporter YSL3-like [Nelumbo nucifera]
LRWT_f3p0_2122_transcript27442_g1	PREDICTED: metal transporter Nramp5-like [Nelumbo nucifera]
LRWT_f8p0_1636_transcript39340_g2	PREDICTED: metal tolerance protein 4-like isoform X2 [Nicotiana tomentosiformis]
LRWT_f9p0_827_transcript71211_g1	PREDICTED: membrane steroid-binding protein 2-like [Nelumbo nucifera]
LRWT_f2p0_2770_transcript16392_g2	PREDICTED: mechanosensitive ion channel protein 10 [Nelumbo nucifera]
LRWT_f5p0_1585_transcript42269_g2	PREDICTED: MATE efflux family protein 5-like [Nelumbo nucifera]
LRWT_f10p0_453_transcript91926_g2	PREDICTED: MAP7 domain-containing protein 1-like [Prunus mume]
LRWT_f3p0_649_transcript82745_g8	PREDICTED: mannose-specific lectin-like [Musa acuminata subsp. malaccensis]
LRWT_f2p0_641_transcript83109_g7	PREDICTED: mannose-specific lectin [Amborella trichopoda]
LRWT_f2p0_1086_transcript62111_g4	PREDICTED: MADS-box transcription factor 23 isoform X1 [Nelumbo nucifera]
LRWT_f5p0_956_transcript65711_g1	PREDICTED: MADS-box protein SOC1-like [Nelumbo nucifera]
LRWT_f4p0_2491_transcript20717_g5	PREDICTED: luminal-binding protein [Solanum pennellii]
LRWT_f16p0_2592_transcript18818_g1	PREDICTED: LRR receptor-like serine/threonine-protein kinase GSO2 [Jatropha curcas]
LRWT_f2p0_1677_transcript39895_g10	PREDICTED: low-temperature-induced cysteine proteinase [Vitis vinifera]
LRWT_f3p0_1467_transcript47625_g7	PREDICTED: LOW QUALITY PROTEIN: UDP-glycosyltransferase 91C1-like [Eucalyptus grandis]
LRWT_f2p0_1536_transcript44635_g4	PREDICTED: LOW QUALITY PROTEIN: UDP-glycosyltransferase 91C1-like [Eucalyptus grandis]
LRWT_f7p0_1348_transcript49884_g2	PREDICTED: LOW QUALITY PROTEIN: probable WRKY transcription factor 57 [Ricinus communis]
LRWT_f2p0_1507_transcript45902_g12	PREDICTED: LOW QUALITY PROTEIN: probable WRKY transcription factor 57 [Ricinus communis]
LRWT_f2p0_2455_transcript21584_g12	PREDICTED: LOW QUALITY PROTEIN: heat shock cognate 70 kDa protein 2-like [Jatropha curcas]
LRWT_f2p0_2934_transcript14228_g1	PREDICTED: LOW QUALITY PROTEIN: heat shock cognate 70 kDa protein 2-like [Jatropha curcas]
LRWT_f30p0_1025_transcript64325_g1	PREDICTED: LOB domain-containing protein 40 [Jatropha curcas]
LRWT_f2p0_838_transcript72963_g10	PREDICTED: LOB domain-containing protein 38-like [Glycine max]
LRWT_f4p0_794_transcript73061_g2	PREDICTED: LOB domain-containing protein 15 [Ricinus communis]
LRWT_f2p0_773_transcript76379_g14	PREDICTED: lipoxygenase homology domain-containing protein 1-like [Solanum tuberosum]
LRWT_f4p0_621_transcript83717_g3	PREDICTED: lipoxygenase homology domain-containing protein 1-like [Malus domestica]
LRWT_f2p0_2943_transcript14029_g2	PREDICTED: lipoxygenase 6, chloroplastic [Nelumbo nucifera]
LRWT_f10p0_2978_transcript12701_g1	PREDICTED: lipoxygenase 6, chloroplastic [Nelumbo nucifera]
LRWT_f3p0_2686_transcript17904_g1	PREDICTED: lipase-like PAD4 [Nelumbo nucifera]
LRWT_f64p0_2856_transcript13746_g1	PREDICTED: linoleate 13S-lipoxygenase 2-1, chloroplastic [Vitis vinifera]
LRWT_f2p0_2874_transcript12810_g1	PREDICTED: linoleate 13S-lipoxygenase 2-1, chloroplastic [Citrus sinensis]
LRWT_f12p0_1259_transcript51925_g1	PREDICTED: leucoanthocyanidin dioxygenase-like isoform X1 [Populus euphratica]
LRWT_f2p0_3457_transcript8378_g2	PREDICTED: leucine-rich repeat receptor-like protein kinase PXL2 [Vitis vinifera]
LRWT_f3p0_2009_transcript29931_g2	PREDICTED: leucine aminopeptidase 1 [Vitis vinifera]
LRWT_f5p0_2115_transcript27323_g1	PREDICTED: leucine aminopeptidase 1 [Vitis vinifera]
LRWT_f4p0_571_transcript86737_g5	PREDICTED: late embryogenesis abundant protein Lea5 [Nicotiana tomentosiformis]
LRWT_f2p0_732_transcript77912_g1	PREDICTED: late embryogenesis abundant protein Lea14-A [Nelumbo nucifera]
LRWT_f46p0_1070_transcript58640_g1	PREDICTED: L-ascorbate peroxidase 2, cytosolic [Nelumbo nucifera]
LRWT_f3p0_1824_transcript34989_g1	PREDICTED: L-ascorbate oxidase homolog [Nelumbo nucifera]
LRWT_f4p0_1945_transcript30709_g2	PREDICTED: L-ascorbate oxidase homolog [Nelumbo nucifera]
LRWT_f33p0_1634_transcript38837_g1	PREDICTED: L-Ala-D/L-amino acid epimerase isoform X2 [Nelumbo nucifera]
LRWT_f15p0_716_transcript76679_g1	PREDICTED: lachrymatory-factor synthase-like [Nelumbo nucifera]
LRWT_f2p0_749_transcript78325_g21	PREDICTED: lachrymatory-factor synthase-like [Nelumbo nucifera]
LRWT_f3p0_1937_transcript31770_g2	PREDICTED: laccase-12 [Vitis vinifera]
LRWT_f5p0_1982_transcript30780_g2	PREDICTED: laccase-12 [Vitis vinifera]
LRWT_f2p0_2036_transcript28420_g1	PREDICTED: ketol-acid reductoisomerase, chloroplastic [Prunus mume]
LRWT_f4p0_1972_transcript29808_g2	PREDICTED: ketol-acid reductoisomerase, chloroplastic [Prunus mume]
LRWT_f3p0_1271_transcript54766_g5	PREDICTED: isoaspartyl peptidase/L-asparaginase 1 [Vitis vinifera]
LRWT_f7p0_1225_transcript56066_g2	PREDICTED: inositol oxygenase 1-like [Eucalyptus grandis]
LRWT_f5p0_1780_transcript36291_g1	PREDICTED: inosine-5'-monophosphate dehydrogenase 2-like [Nelumbo nucifera]
LRWT_f3p0_884_transcript70836_g5	PREDICTED: inorganic pyrophosphatase 3-like [Nicotiana tomentosiformis]
LRWT_f3p0_2082_transcript28604_g2	PREDICTED: inorganic phosphate transporter 1-4-like isoform X1 [Nelumbo nucifera]
LRWT_f3p0_2035_transcript29205_g2	PREDICTED: inorganic phosphate transporter 1-4-like isoform X1 [Nelumbo nucifera]
LRWT_f11p0_1051_transcript62880_g1	PREDICTED: INO80 complex subunit D isoform X2 [Nelumbo nucifera]
LRWT_f4p0_1723_transcript37263_g2	PREDICTED: inactive tetrahydrocannabinolic acid synthase-like [Vitis vinifera]
LRWT_f4p0_793_transcript75187_g4	PREDICTED: inactive protein RESTRICTED TEV MOVEMENT 1-like [Sesamum indicum]
LRWT_f5p0_1835_transcript34666_g5	PREDICTED: IAA-amino acid hydrolase ILR1-like 6 [Gossypium raimondii]
LRWT_f2p0_1524_transcript45286_g14	PREDICTED: IAA-amino acid hydrolase ILR1-like 3 [Nelumbo nucifera]
LRWT_f2p0_1732_transcript37923_g6	PREDICTED: IAA-amino acid hydrolase ILR1-like 1 [Nelumbo nucifera]
LRWT_f41p0_1764_transcript32962_g1	PREDICTED: hydroquinone glucosyltransferase-like [Gossypium raimondii]
LRWT_f4p0_2063_transcript28433_g2	PREDICTED: hsp70-Hsp90 organizing protein 3 [Nelumbo nucifera]
LRWT_f4p0_2126_transcript27642_g4	PREDICTED: hsp70-Hsp90 organizing protein 3 [Nelumbo nucifera]
LRWT_f5p0_1189_transcript56873_g1	PREDICTED: homeobox-leucine zipper protein HAT5-like [Nelumbo nucifera]
LRWT_f32p0_1458_transcript44281_g1	PREDICTED: homeobox-leucine zipper protein HAT5-like [Nelumbo nucifera]
LRWT_f38p0_1268_transcript53067_g1	PREDICTED: histone deacetylase HDT1-like isoform X2 [Nelumbo nucifera]
LRWT_f3p0_1328_transcript53251_g11	PREDICTED: histone deacetylase HDT1-like isoform X2 [Nelumbo nucifera]
LRWT_f2p0_1282_transcript54418_g19	PREDICTED: histone deacetylase HDT1 isoform X1 [Cucumis sativus]
LRWT_f7p0_2241_transcript24575_g1	PREDICTED: HIPL1 protein-like isoform X1 [Nelumbo nucifera]
LRWT_f2p0_872_transcript71403_g9	PREDICTED: high-affinity nitrate transporter-activating protein 2.1-like [Nelumbo nucifera]
LRWT_f3p0_903_transcript70004_g4	PREDICTED: high-affinity nitrate transporter-activating protein 2.1-like [Nelumbo nucifera]
LRWT_f3p0_911_transcript69559_g2	PREDICTED: high-affinity nitrate transporter-activating protein 2.1-like [Nelumbo nucifera]
LRWT_f3p0_1045_transcript64934_g9	PREDICTED: high-affinity nitrate transporter-activating protein 2.1-like [Nelumbo nucifera]
LRWT_f3p0_1040_transcript63989_g2	PREDICTED: heterodimeric geranylgeranyl pyrophosphate synthase small subunit, chloroplastic-like [Cicer arietinum]
LRWT_f3p0_1855_transcript34080_g4	PREDICTED: heptahelical transmembrane protein 4 isoform X1 [Gossypium raimondii]
LRWT_f6p0_645_transcript78132_g1	PREDICTED: heavy metal-associated isoprenylated plant protein 26 [Ricinus communis]
LRWT_f9p0_938_transcript66151_g1	PREDICTED: heat stress transcription factor B-4b-like [Nelumbo nucifera]
LRWT_f3p0_2827_transcript15767_g4	PREDICTED: heat shock protein 83-like isoform X1 [Gossypium raimondii]
LRWT_f21p0_2529_transcript19116_g1	PREDICTED: heat shock protein 83 [Cucumis melo]
LRWT_f5p0_2525_transcript20159_g1	PREDICTED: heat shock protein 83 [Cucumis melo]
LRWT_f2p0_3022_transcript13207_g2	PREDICTED: heat shock protein 81-1-like isoform X1 [Nelumbo nucifera]
LRWT_f9p0_2484_transcript20232_g2	PREDICTED: heat shock cognate protein 80-like [Gossypium raimondii]
LRWT_f3p0_2621_transcript18653_g1	PREDICTED: heat shock cognate protein 80-like [Gossypium raimondii]
LRWT_f3p0_2569_transcript19747_g4	PREDICTED: heat shock cognate protein 80-like [Gossypium raimondii]
LRWT_f4p0_2220_transcript25209_g2	PREDICTED: heat shock cognate 70 kDa protein 2 [Vitis vinifera]
LRWT_f3p0_2764_transcript16263_g1	PREDICTED: heat shock cognate 70 kDa protein 2 [Ricinus communis]
LRWT_f6p0_2179_transcript25865_g2	PREDICTED: heat shock cognate 70 kDa protein 2 [Malus domestica]
LRWT_f9p0_1173_transcript58159_g1	PREDICTED: haloacid dehalogenase-like hydrolase domain-containing protein 3 [Nelumbo nucifera]
LRWT_f3p0_2763_transcript16890_g2	PREDICTED: G-type lectin S-receptor-like serine/threonine-protein kinase SD2-5 [Sesamum indicum]
LRWT_f2p0_963_transcript67301_g8	PREDICTED: G-type lectin S-receptor-like serine/threonine-protein kinase SD2-5 [Musa acuminata subsp. malaccensis]
LRWT_f3p0_2857_transcript15350_g2	PREDICTED: G-type lectin S-receptor-like serine/threonine-protein kinase B120 [Nelumbo nucifera]
LRWT_f6p0_2939_transcript14043_g1	PREDICTED: G-type lectin S-receptor-like serine/threonine-protein kinase At4g27290 isoform X2 [Ricinus communis]
LRWT_f5p0_2820_transcript15478_g2	PREDICTED: G-type lectin S-receptor-like serine/threonine-protein kinase At4g27290 isoform X2 [Nelumbo nucifera]
LRWT_f2p0_2615_transcript18831_g5	PREDICTED: G-type lectin S-receptor-like serine/threonine-protein kinase At4g27290 isoform X2 [Nelumbo nucifera]
LRWT_f2p0_2572_transcript19468_g6	PREDICTED: G-type lectin S-receptor-like serine/threonine-protein kinase At4g27290 isoform X2 [Nelumbo nucifera]
LRWT_f12p0_2809_transcript15003_g1	PREDICTED: G-type lectin S-receptor-like serine/threonine-protein kinase At4g27290 isoform X2 [Nelumbo nucifera]
LRWT_f3p0_2903_transcript14735_g3	PREDICTED: G-type lectin S-receptor-like serine/threonine-protein kinase At4g27290 isoform X2 [Nelumbo nucifera]
LRWT_f6p0_2746_transcript16594_g1	PREDICTED: G-type lectin S-receptor-like serine/threonine-protein kinase At4g27290 isoform X1 [Nelumbo nucifera]
LRWT_f3p0_3206_transcript11017_g1	PREDICTED: G-type lectin S-receptor-like serine/threonine-protein kinase At4g27290 isoform X1 [Nelumbo nucifera]
LRWT_f2p0_3026_transcript13079_g3	PREDICTED: G-type lectin S-receptor-like serine/threonine-protein kinase At4g27290 [Nelumbo nucifera]
LRWT_f2p0_3181_transcript10659_g1	PREDICTED: G-type lectin S-receptor-like serine/threonine-protein kinase At4g27290 [Nelumbo nucifera]
LRWT_f5p0_2930_transcript14141_g1	PREDICTED: G-type lectin S-receptor-like serine/threonine-protein kinase At1g34300, partial [Amborella trichopoda]
LRWT_f3p0_1974_transcript30960_g5	PREDICTED: G-type lectin S-receptor-like serine/threonine-protein kinase At1g34300 [Vitis vinifera]
LRWT_f2p0_1995_transcript30248_g2	PREDICTED: G-type lectin S-receptor-like serine/threonine-protein kinase At1g34300 [Vitis vinifera]
LRWT_f4p0_3326_transcript9611_g1	PREDICTED: G-type lectin S-receptor-like serine/threonine-protein kinase At1g34300 [Elaeis guineensis]
LRWT_f2p0_1267_transcript54825_g4	PREDICTED: glyoxylate/hydroxypyruvate reductase HPR3 [Nelumbo nucifera]
LRWT_f7p0_940_transcript64731_g1	PREDICTED: glycolipid transfer protein 3-like [Gossypium raimondii]
LRWT_f4p0_2659_transcript17217_g1	PREDICTED: glycerophosphodiester phosphodiesterase GDPDL3-like [Nelumbo nucifera]
LRWT_f3p0_1640_transcript40941_g1	PREDICTED: glyceraldehyde-3-phosphate dehydrogenase GAPCP2, chloroplastic-like [Nelumbo nucifera]
LRWT_f31p0_1596_transcript39194_g1	PREDICTED: glyceraldehyde-3-phosphate dehydrogenase GAPCP1, chloroplastic [Vitis vinifera]
LRWT_f9p0_1330_transcript51846_g2	PREDICTED: glutelin type-A 1-like [Nelumbo nucifera]
LRWT_f3p0_852_transcript72310_g2	PREDICTED: glutathione transferase GST 23-like [Nelumbo nucifera]
LRWT_f34p0_1038_transcript62021_g1	PREDICTED: glutathione S-transferase U17-like [Beta vulgaris subsp. vulgaris]
LRWT_f2p0_1221_transcript56762_g7	PREDICTED: glutathione S-transferase U17-like [Beta vulgaris subsp. vulgaris]
LRWT_f32p0_805_transcript72249_g1	PREDICTED: glutathione S-transferase U10-like [Vitis vinifera]
LRWT_f3p0_942_transcript68333_g6	PREDICTED: glutathione S-transferase U10-like [Vitis vinifera]
LRWT_f3p0_1357_transcript51301_g3	PREDICTED: glutathione S-transferase omega-like 2 [Nelumbo nucifera]
LRWT_f2p0_534_transcript88880_g10	PREDICTED: glutathione S-transferase F13-like [Nelumbo nucifera]
LRWT_f3p0_854_transcript72321_g6	PREDICTED: glutathione S-transferase F13 [Vitis vinifera]
LRWT_f13p0_977_transcript64568_g1	PREDICTED: glutathione S-transferase F13 [Pyrus x bretschneideri]
LRWT_f2p0_986_transcript66322_g4	PREDICTED: glutathione S-transferase F13 [Pyrus x bretschneideri]
LRWT_f69p0_835_transcript70893_g1	PREDICTED: glutathione S-transferase F13 [Nelumbo nucifera]
LRWT_f28p0_872_transcript69707_g1	PREDICTED: glutathione S-transferase F10-like [Nelumbo nucifera]
LRWT_f6p0_784_transcript73560_g3	PREDICTED: glutathione S-transferase F10-like [Nelumbo nucifera]
LRWT_f4p0_1845_transcript34228_g4	PREDICTED: glutathione reductase, cytosolic [Pyrus x bretschneideri]
LRWT_f4p0_587_transcript85917_g5	PREDICTED: glutaredoxin-C6-like [Nelumbo nucifera]
LRWT_f2p0_3146_transcript11834_g2	PREDICTED: glutamine synthetase nodule isozyme [Amborella trichopoda]
LRWT_f80p0_2081_transcript26295_g1	PREDICTED: glutamate--cysteine ligase, chloroplastic [Ricinus communis]
LRWT_f66p0_7367_transcript195_g1	PREDICTED: glutamate synthase 1 [NADH], chloroplastic isoform X1 [Vitis vinifera]
LRWT_f14p0_1762_transcript35364_g1	PREDICTED: glutamate decarboxylase 1 [Cucumis sativus]
LRWT_f2p0_1768_transcript36765_g7	PREDICTED: glucose-6-phosphate/phosphate translocator 2, chloroplastic-like [Nelumbo nucifera]
LRWT_f41p0_2318_transcript21292_g1	PREDICTED: glucose-6-phosphate isomerase 1, chloroplastic-like [Glycine max]
LRWT_f3p0_993_transcript66000_g1	PREDICTED: gibberellin 2-beta-dioxygenase-like isoform X2 [Cicer arietinum]
LRWT_f3p0_1460_transcript48301_g9	PREDICTED: gibberellin 2-beta-dioxygenase 8 [Nelumbo nucifera]
LRWT_f52p0_810_transcript72591_g1	PREDICTED: germin-like protein 5-1 [Nelumbo nucifera]
LRWT_f4p0_1878_transcript32816_g1	PREDICTED: geraniol 8-hydroxylase-like [Nicotiana tomentosiformis]
LRWT_f3p0_1044_transcript63896_g4	PREDICTED: GEM-like protein 5 [Nelumbo nucifera]
LRWT_f8p0_1192_transcript57092_g2	PREDICTED: GDSL esterase/lipase At4g01130 isoform X1 [Nelumbo nucifera]
LRWT_f8p0_1307_transcript53220_g1	PREDICTED: GDSL esterase/lipase At3g62280 [Vitis vinifera]
LRWT_f98p0_1290_transcript49780_g1	PREDICTED: GDSL esterase/lipase 7-like [Glycine max]
LRWT_f2p0_1280_transcript54895_g17	PREDICTED: GDSL esterase/lipase 7-like [Glycine max]
LRWT_f4p0_1601_transcript41792_g3	PREDICTED: GDSL esterase/lipase 7-like [Glycine max]
LRWT_f2p0_1492_transcript46339_g5	PREDICTED: gamma-glutamyl hydrolase 2 isoform X1 [Vitis vinifera]
LRWT_f4p0_1165_transcript58813_g8	PREDICTED: galactinol synthase 1 [Gossypium raimondii]
LRWT_f3p0_1396_transcript48994_g3	PREDICTED: fructose-bisphosphate aldolase cytoplasmic isozyme [Nelumbo nucifera]
LRWT_f10p0_1149_transcript59290_g1	PREDICTED: flavonol synthase/flavanone 3-hydroxylase-like [Nelumbo nucifera]
LRWT_f2p0_1147_transcript59657_g2	PREDICTED: flavonol synthase/flavanone 3-hydroxylase-like [Nelumbo nucifera]
LRWT_f6p0_1848_transcript34169_g1	PREDICTED: flavonoid 3'-monooxygenase-like [Nelumbo nucifera]
LRWT_f3p0_1784_transcript35176_g1	PREDICTED: flavin-containing monooxygenase FMO GS-OX-like 9 [Nicotiana tomentosiformis]
LRWT_f6p0_1662_transcript38971_g1	PREDICTED: flavin-containing monooxygenase FMO GS-OX-like 3 [Vitis vinifera]
LRWT_f2p0_1203_transcript57551_g4	PREDICTED: feruloyl CoA ortho-hydroxylase 1-like isoform X2 [Gossypium raimondii]
LRWT_f3p0_1207_transcript57282_g2	PREDICTED: feruloyl CoA ortho-hydroxylase 1-like isoform X2 [Gossypium raimondii]
LRWT_f2p0_1247_transcript55880_g11	PREDICTED: feruloyl CoA ortho-hydroxylase 1-like isoform X2 [Gossypium raimondii]
LRWT_f12p0_1276_transcript52130_g1	PREDICTED: feruloyl CoA ortho-hydroxylase 1-like [Gossypium raimondii]
LRWT_f97p0_1120_transcript59482_g1	PREDICTED: ferritin-2, chloroplastic [Solanum pennellii]
LRWT_f22p0_2448_transcript19177_g1	PREDICTED: ferric reduction oxidase 2 isoform X1 [Ricinus communis]
LRWT_f2p0_2046_transcript29023_g4	PREDICTED: ferredoxin--nitrite reductase, chloroplastic [Nelumbo nucifera]
LRWT_f2p0_2079_transcript27161_g2	PREDICTED: ferredoxin--nitrite reductase, chloroplastic [Nelumbo nucifera]
LRWT_f3p0_1068_transcript62906_g14	PREDICTED: ferredoxin-3, chloroplastic [Vitis vinifera]
LRWT_f2p0_965_transcript67251_g10	PREDICTED: F-box/LRR-repeat protein At3g48880-like isoform X1 [Vitis vinifera]
LRWT_f2p0_898_transcript70217_g13	PREDICTED: F-box/LRR-repeat protein At3g48880-like isoform X1 [Vitis vinifera]
LRWT_f7p0_964_transcript67008_g2	PREDICTED: F-box/LRR-repeat protein At3g48880-like isoform X1 [Vitis vinifera]
LRWT_f13p0_1057_transcript60773_g1	PREDICTED: F-box/LRR-repeat protein At3g48880-like [Nelumbo nucifera]
LRWT_f2p0_1343_transcript51859_g11	PREDICTED: F-box/kelch-repeat protein At5g43190 [Nelumbo nucifera]
LRWT_f3p0_1344_transcript51906_g5	PREDICTED: F-box/kelch-repeat protein At1g23390-like [Nelumbo nucifera]
LRWT_f25p0_1166_transcript56405_g2	PREDICTED: F-box protein SKIP24 isoform X3 [Nelumbo nucifera]
LRWT_f2p0_1130_transcript60344_g3	PREDICTED: F-box protein PP2-B10-like [Nelumbo nucifera]
LRWT_f2p0_693_transcript80380_g13	PREDICTED: F-box protein GID2 [Vitis vinifera]
LRWT_f3p0_1431_transcript48592_g3	PREDICTED: F-box protein CPR30-like [Nelumbo nucifera]
LRWT_f2p0_1313_transcript53054_g5	PREDICTED: F-box protein At2g26160-like [Solanum lycopersicum]
LRWT_f3p0_1841_transcript34504_g4	PREDICTED: F-box only protein 6-like isoform X1 [Nelumbo nucifera]
LRWT_f4p0_983_transcript66330_g3	PREDICTED: fasciclin-like arabinogalactan protein 13 [Nelumbo nucifera]
LRWT_f2p0_1654_transcript40626_g4	PREDICTED: FAD-dependent urate hydroxylase [Ricinus communis]
LRWT_f23p0_1080_transcript59827_g1	PREDICTED: extradiol ring-cleavage dioxygenase-like [Nelumbo nucifera]
LRWT_f4p0_1110_transcript60749_g2	PREDICTED: extradiol ring-cleavage dioxygenase [Vitis vinifera]
LRWT_f15p0_829_transcript69365_g1	PREDICTED: extracellular ribonuclease LE-like [Malus domestica]
LRWT_f7p0_1155_transcript59072_g2	PREDICTED: expansin-A7-like [Prunus mume]
LRWT_f4p0_1343_transcript51834_g3	PREDICTED: expansin-A15-like [Nelumbo nucifera]
LRWT_f5p0_1024_transcript63994_g3	PREDICTED: expansin-A11 [Jatropha curcas]
LRWT_f52p0_783_transcript73583_g1	PREDICTED: eukaryotic translation initiation factor isoform 4E-2-like [Nelumbo nucifera]
LRWT_f7p0_1003_transcript64828_g1	PREDICTED: ethylene-responsive transcription factor RAP2-3-like [Nelumbo nucifera]
LRWT_f3p0_1343_transcript51878_g3	PREDICTED: ethylene-responsive transcription factor RAP2-3-like [Nelumbo nucifera]
LRWT_f3p0_997_transcript65511_g2	PREDICTED: ethylene-responsive transcription factor RAP2-11 [Vitis vinifera]
LRWT_f2p0_769_transcript76411_g1	PREDICTED: ethylene-responsive transcription factor ERF003-like [Nelumbo nucifera]
LRWT_f3p0_1472_transcript47088_g5	PREDICTED: ethylene-responsive transcription factor ABR1 [Vitis vinifera]
LRWT_f4p0_1879_transcript33392_g4	PREDICTED: ethanolamine-phosphate cytidylyltransferase [Vitis vinifera]
LRWT_f5p0_1685_transcript38920_g2	PREDICTED: equilibrative nucleotide transporter 3-like isoform X1 [Populus euphratica]
LRWT_f44p0_1568_transcript42138_g1	PREDICTED: epidermis-specific secreted glycoprotein EP1-like [Nelumbo nucifera]
LRWT_f9p0_1491_transcript43907_g1	PREDICTED: epidermis-specific secreted glycoprotein EP1-like [Nelumbo nucifera]
LRWT_f2p0_1709_transcript38776_g6	PREDICTED: epidermis-specific secreted glycoprotein EP1-like [Nelumbo nucifera]
LRWT_f28p0_1461_transcript45838_g2	PREDICTED: epidermis-specific secreted glycoprotein EP1-like [Nelumbo nucifera]
LRWT_f4p0_658_transcript81859_g6	PREDICTED: EPIDERMAL PATTERNING FACTOR-like protein 5 [Ricinus communis]
LRWT_f3p0_1790_transcript36012_g2	PREDICTED: ent-kaurenoic acid oxidase 1-like [Eucalyptus grandis]
LRWT_f2p0_1801_transcript35197_g3	PREDICTED: ent-kaurene oxidase, chloroplastic-like [Malus domestica]
LRWT_f3p0_1932_transcript31901_g2	PREDICTED: ent-kaurene oxidase, chloroplastic-like [Malus domestica]
LRWT_f2p0_2571_transcript19163_g3	PREDICTED: ent-copalyl diphosphate synthase, chloroplastic-like [Populus euphratica]
LRWT_f2p0_2655_transcript18212_g3	PREDICTED: ent-copalyl diphosphate synthase, chloroplastic-like [Nelumbo nucifera]
LRWT_f2p0_2711_transcript17291_g3	PREDICTED: ent-copalyl diphosphate synthase, chloroplastic-like [Nelumbo nucifera]
LRWT_f2p0_2705_transcript17416_g5	PREDICTED: ent-copalyl diphosphate synthase, chloroplastic-like [Nelumbo nucifera]
LRWT_f2p0_2622_transcript18626_g4	PREDICTED: ent-copalyl diphosphate synthase, chloroplastic-like [Nelumbo nucifera]
LRWT_f3p0_2605_transcript18946_g5	PREDICTED: ent-copalyl diphosphate synthase, chloroplastic-like [Nelumbo nucifera]
LRWT_f2p0_2589_transcript19173_g3	PREDICTED: ent-copalyl diphosphate synthase, chloroplastic [Nelumbo nucifera]
LRWT_f2p0_2817_transcript15697_g1	PREDICTED: ent-copalyl diphosphate synthase, chloroplastic [Nelumbo nucifera]
LRWT_f28p0_1922_transcript30024_g1	PREDICTED: enolase 1, chloroplastic [Jatropha curcas]
LRWT_f6p0_1728_transcript36887_g1	PREDICTED: enolase [Vitis vinifera]
LRWT_f2p0_684_transcript80838_g7	PREDICTED: endoplasmin homolog [Phoenix dactylifera]
LRWT_f2p0_1928_transcript32057_g7	PREDICTED: elongation factor 1-alpha-like [Malus domestica]
LRWT_f2p0_1628_transcript41510_g5	PREDICTED: elongation factor 1-alpha-like [Malus domestica]
LRWT_f2p0_675_transcript81308_g10	PREDICTED: elicitor-responsive protein 1 [Vitis vinifera]
LRWT_f6p0_734_transcript75770_g3	PREDICTED: elicitor-responsive protein 1 [Vitis vinifera]
LRWT_f3p0_1119_transcript61381_g10	PREDICTED: early nodulin-like protein 2 [Sesamum indicum]
LRWT_f16p0_529_transcript88749_g2	PREDICTED: early nodulin-93-like [Nelumbo nucifera]
LRWT_f2p0_897_transcript70184_g3	PREDICTED: early light-induced protein 1, chloroplastic-like isoform X2 [Nelumbo nucifera]
LRWT_f19p0_844_transcript71643_g1	PREDICTED: early light-induced protein 1, chloroplastic-like [Nelumbo nucifera]
LRWT_f3p0_938_transcript68386_g7	PREDICTED: early light-induced protein 1, chloroplastic-like [Nelumbo nucifera]
LRWT_f2p0_1152_transcript60551_g19	PREDICTED: E3 ubiquitin-protein ligase RNF185 isoform X1 [Nelumbo nucifera]
LRWT_f6p0_446_transcript92601_g2	PREDICTED: E3 ubiquitin-protein ligase RNF115-like [Cucumis sativus]
LRWT_f2p0_1376_transcript50593_g1	PREDICTED: E3 ubiquitin-protein ligase PUB23-like [Nelumbo nucifera]
LRWT_f3p0_1400_transcript49800_g3	PREDICTED: E3 ubiquitin-protein ligase ATL6-like [Nelumbo nucifera]
LRWT_f2p0_1229_transcript56668_g10	PREDICTED: E3 ubiquitin-protein ligase ATL42 [Vitis vinifera]
LRWT_f2p0_1193_transcript57954_g8	PREDICTED: E3 ubiquitin-protein ligase ATL41-like [Populus euphratica]
LRWT_f2p0_567_transcript87186_g16	PREDICTED: dof zinc finger protein DOF1.5-like [Nelumbo nucifera]
LRWT_f2p0_1480_transcript46766_g9	PREDICTED: dnaJ protein ERDJ3B [Vitis vinifera]
LRWT_f7p0_2063_transcript28343_g1	PREDICTED: dnaJ protein ERDJ3A [Nelumbo nucifera]
LRWT_f27p0_988_transcript63370_g1	PREDICTED: dnaJ homolog subfamily B member 7-like isoform X2 [Pyrus x bretschneideri]
LRWT_f2p0_1256_transcript54947_g4	PREDICTED: dnaJ homolog subfamily B member 13-like [Gossypium raimondii]
LRWT_f2p0_1597_transcript42451_g5	PREDICTED: DNA-damage-repair/toleration protein DRT100-like [Nelumbo nucifera]
LRWT_f4p0_832_transcript73161_g2	PREDICTED: disease resistance response protein 206-like [Nelumbo nucifera]
LRWT_f2p0_964_transcript67314_g12	PREDICTED: dirigent protein 9-like [Nelumbo nucifera]
LRWT_f5p0_975_transcript66549_g3	PREDICTED: dirigent protein 9-like [Nelumbo nucifera]
LRWT_f3p0_1074_transcript62491_g2	PREDICTED: dirigent protein 9-like [Nelumbo nucifera]
LRWT_f3p0_730_transcript78841_g12	PREDICTED: dirigent protein 5-like [Sesamum indicum]
LRWT_f4p0_777_transcript75019_g4	PREDICTED: dirigent protein 5-like [Sesamum indicum]
LRWT_f5p0_678_transcript80767_g2	PREDICTED: dirigent protein 22-like [Gossypium raimondii]
LRWT_f3p0_655_transcript82433_g4	PREDICTED: dirigent protein 22-like [Gossypium raimondii]
LRWT_f3p0_388_transcript97219_g8	PREDICTED: dirigent protein 10-like [Eucalyptus grandis]
LRWT_f6p0_1203_transcript57226_g3	PREDICTED: dehydrogenase/reductase SDR family member 12 [Nelumbo nucifera]
LRWT_f2p0_1199_transcript57765_g12	PREDICTED: dehydrodolichyl diphosphate synthase 6-like [Erythranthe guttata]
LRWT_f2p0_462_transcript92843_g11	PREDICTED: defensin Ec-AMP-D2-like [Nelumbo nucifera]
LRWT_f5p0_558_transcript86853_g3	PREDICTED: defensin Ec-AMP-D2-like [Nelumbo nucifera]
LRWT_f4p0_795_transcript74674_g4	PREDICTED: dCTP pyrophosphatase 1-like [Musa acuminata subsp. malaccensis]
LRWT_f2p0_532_transcript89897_g15	PREDICTED: dCTP pyrophosphatase 1-like [Musa acuminata subsp. malaccensis]
LRWT_f6p0_1260_transcript54841_g3	PREDICTED: D-amino-acid transaminase, chloroplastic-like [Sesamum indicum]
LRWT_f90p0_2012_transcript28232_g1	PREDICTED: D-3-phosphoglycerate dehydrogenase 3, chloroplastic [Nelumbo nucifera]
LRWT_f3p0_2596_transcript19239_g5	PREDICTED: D-3-phosphoglycerate dehydrogenase 2, chloroplastic [Nicotiana sylvestris]
LRWT_f51p0_1134_transcript58419_g1	PREDICTED: cytosolic sulfotransferase 15-like [Nicotiana tomentosiformis]
LRWT_f195p0_1142_transcript56373_g1	PREDICTED: cytosolic sulfotransferase 15-like [Nicotiana tomentosiformis]
LRWT_f4p0_1369_transcript48108_g1	PREDICTED: cytosolic sulfotransferase 15-like [Nelumbo nucifera]
LRWT_f19p0_1751_transcript36898_g1	PREDICTED: cytokinin hydroxylase-like [Nelumbo nucifera]
LRWT_f3p0_2485_transcript20868_g1	PREDICTED: cytochrome P450 CYP82D47-like [Nelumbo nucifera]
LRWT_f10p0_1824_transcript34382_g1	PREDICTED: cytochrome P450 CYP82D47-like [Nelumbo nucifera]
LRWT_f2p0_1676_transcript39869_g6	PREDICTED: cytochrome P450 CYP82D47-like [Nelumbo nucifera]
LRWT_f62p0_1743_transcript34006_g1	PREDICTED: cytochrome P450 CYP82D47-like [Nelumbo nucifera]
LRWT_f2p0_1879_transcript33386_g4	PREDICTED: cytochrome P450 CYP749A22-like [Prunus mume]
LRWT_f2p0_1776_transcript36518_g11	PREDICTED: cytochrome P450 CYP736A12-like [Pyrus x bretschneideri]
LRWT_f6p0_1730_transcript36601_g2	PREDICTED: cytochrome P450 CYP736A12-like [Pyrus x bretschneideri]
LRWT_f7p0_1690_transcript34886_g1	PREDICTED: cytochrome P450 CYP736A12-like [Pyrus x bretschneideri]
LRWT_f8p0_1779_transcript32556_g1	PREDICTED: cytochrome P450 CYP736A12-like [Pyrus x bretschneideri]
LRWT_f2p0_1731_transcript37630_g6	PREDICTED: cytochrome P450 CYP736A12-like [Prunus mume]
LRWT_f7p0_1721_transcript37477_g1	PREDICTED: cytochrome P450 CYP736A12 [Vitis vinifera]
LRWT_f2p0_242_transcript106456_g18	PREDICTED: cytochrome P450 CYP72A219-like [Cucumis sativus]
LRWT_f11p0_1627_transcript39901_g2	PREDICTED: cytochrome P450 94C1-like [Nelumbo nucifera]
LRWT_f3p0_1684_transcript39661_g7	PREDICTED: cytochrome P450 94B3-like [Nelumbo nucifera]
LRWT_f3p0_1760_transcript37409_g4	PREDICTED: cytochrome P450 89A2-like [Nelumbo nucifera]
LRWT_f2p0_1793_transcript35901_g5	PREDICTED: cytochrome P450 89A2-like [Nelumbo nucifera]
LRWT_f14p0_1830_transcript34677_g1	PREDICTED: cytochrome P450 89A2-like [Nelumbo nucifera]
LRWT_f9p0_1599_transcript41779_g2	PREDICTED: cytochrome P450 81D11-like [Pyrus x bretschneideri]
LRWT_f5p0_1860_transcript33946_g1	PREDICTED: cytochrome P450 78A9 [Nelumbo nucifera]
LRWT_f3p0_1599_transcript39532_g1	PREDICTED: cytochrome P450 71A25 [Vitis vinifera]
LRWT_f2p0_1707_transcript38795_g4	PREDICTED: cytochrome P450 71A1-like [Vitis vinifera]
LRWT_f2p0_1404_transcript49960_g11	PREDICTED: cytochrome P450 71A1-like [Nelumbo nucifera]
LRWT_f11p0_1858_transcript31908_g1	PREDICTED: cytochrome P450 71A1-like [Nelumbo nucifera]
LRWT_f13p0_1683_transcript36192_g1	PREDICTED: cytochrome P450 71A1-like [Nelumbo nucifera]
LRWT_f2p0_1755_transcript37156_g8	PREDICTED: cytochrome P450 71A1-like [Nelumbo nucifera]
LRWT_f7p0_1834_transcript34189_g2	PREDICTED: cytochrome P450 71A1-like [Nelumbo nucifera]
LRWT_f2p0_1267_transcript55467_g17	PREDICTED: cytochrome P450 71A1-like [Nelumbo nucifera]
LRWT_f4p0_1725_transcript38065_g2	PREDICTED: cytochrome P450 71A1-like [Nelumbo nucifera]
LRWT_f2p0_1907_transcript32633_g9	PREDICTED: cytochrome P450 704C1-like [Nelumbo nucifera]
LRWT_f4p0_496_transcript90947_g8	PREDICTED: cytochrome c oxidase subunit 6b-2 [Nelumbo nucifera]
LRWT_f10p0_633_transcript82742_g4	PREDICTED: cytochrome c [Jatropha curcas]
LRWT_f4p0_790_transcript75268_g5	PREDICTED: cytochrome c [Brachypodium distachyon]
LRWT_f3p0_715_transcript79182_g2	PREDICTED: cytochrome b-c1 complex subunit 8-like [Nelumbo nucifera]
LRWT_f2p0_605_transcript86282_g24	PREDICTED: cytochrome b-c1 complex subunit 6 isoform X1 [Ricinus communis]
LRWT_f3p0_1573_transcript43453_g2	PREDICTED: cytochrome b561 and DOMON domain-containing protein At5g47530 [Populus euphratica]
LRWT_f8p0_1471_transcript45674_g3	PREDICTED: cytochrome b561 and DOMON domain-containing protein At5g47530 [Populus euphratica]
LRWT_f10p0_775_transcript74907_g2	PREDICTED: cytochrome b561 and DOMON domain-containing protein At4g17280 [Sesamum indicum]
LRWT_f53p0_904_transcript65367_g1	PREDICTED: cytochrome b561 and DOMON domain-containing protein At4g17280 [Sesamum indicum]
LRWT_f2p0_2209_transcript24612_g3	PREDICTED: cysteine-rich receptor-like protein kinase 2 [Vitis vinifera]
LRWT_f3p0_2263_transcript24652_g2	PREDICTED: cysteine-rich receptor-like protein kinase 2 [Phoenix dactylifera]
LRWT_f4p0_1732_transcript37767_g5	PREDICTED: cysteine proteinase RD21a [Citrus sinensis]
LRWT_f3p0_1422_transcript48960_g6	PREDICTED: cysteine proteinase RD19a-like [Nelumbo nucifera]
LRWT_f3p0_1642_transcript41104_g3	PREDICTED: crocetin glucosyltransferase, chloroplastic-like [Vitis vinifera]
LRWT_f2p0_1596_transcript42526_g7	PREDICTED: crocetin glucosyltransferase, chloroplastic-like [Vitis vinifera]
LRWT_f3p0_1686_transcript39504_g5	PREDICTED: crocetin glucosyltransferase, chloroplastic-like [Vitis vinifera]
LRWT_f22p0_1621_transcript39209_g1	PREDICTED: crocetin glucosyltransferase, chloroplastic-like [Vitis vinifera]
LRWT_f2p0_320_transcript100796_g4	PREDICTED: cortical cell-delineating protein [Oryza sativa Japonica Group]
LRWT_f2p0_1190_transcript57935_g2	PREDICTED: copper-transporting ATPase PAA1, chloroplastic-like [Nelumbo nucifera]
LRWT_f9p0_580_transcript84930_g1	PREDICTED: copper transporter 1-like [Fragaria vesca subsp. vesca]
LRWT_f31p0_1400_transcript47158_g1	PREDICTED: clathrin light chain 2-like [Nelumbo nucifera]
LRWT_f2p0_3185_transcript11346_g2	PREDICTED: clathrin heavy chain 2 [Nelumbo nucifera]
LRWT_f4p0_1329_transcript51679_g2	PREDICTED: cinnamoyl-CoA reductase 2 [Vitis vinifera]
LRWT_f6p0_1204_transcript56937_g1	PREDICTED: cinnamoyl-CoA reductase 1-like isoform X1 [Nelumbo nucifera]
LRWT_f6p0_1133_transcript59094_g1	PREDICTED: cinnamoyl-CoA reductase 1-like isoform X1 [Nelumbo nucifera]
LRWT_f2p0_1259_transcript54327_g2	PREDICTED: cinnamoyl-CoA reductase 1 [Vitis vinifera]
LRWT_f3p0_361_transcript98536_g5	PREDICTED: chavicol O-methyltransferase-like [Sesamum indicum]
LRWT_f3p0_584_transcript86122_g2	PREDICTED: chaperone protein dnaJ 20, chloroplastic-like [Jatropha curcas]
LRWT_f2p0_862_transcript71844_g7	PREDICTED: CEN-like protein 1 [Phoenix dactylifera]
LRWT_f28p0_2472_transcript19964_g1	PREDICTED: cellulose synthase-like protein E6 isoform X1 [Nelumbo nucifera]
LRWT_f2p0_610_transcript84825_g14	PREDICTED: CDGSH iron-sulfur domain-containing protein NEET [Nelumbo nucifera]
LRWT_f22p0_518_transcript86712_g1	PREDICTED: CDGSH iron-sulfur domain-containing protein NEET [Nelumbo nucifera]
LRWT_f5p0_1338_transcript51549_g2	PREDICTED: CBS domain-containing protein CBSX5-like [Nelumbo nucifera]
LRWT_f62p0_1558_transcript41427_g1	PREDICTED: CBL-interacting serine/threonine-protein kinase 7-like [Nelumbo nucifera]
LRWT_f4p0_1487_transcript45695_g1	PREDICTED: CBL-interacting serine/threonine-protein kinase 4-like [Nelumbo nucifera]
LRWT_f15p0_1735_transcript36942_g1	PREDICTED: CBL-interacting serine/threonine-protein kinase 12-like [Prunus mume]
LRWT_f143p0_2006_transcript27546_g1	PREDICTED: CBL-interacting protein kinase 18 [Nelumbo nucifera]
LRWT_f6p0_1889_transcript30737_g1	PREDICTED: cationic amino acid transporter 5-like [Nelumbo nucifera]
LRWT_f16p0_2449_transcript20917_g1	PREDICTED: cationic amino acid transporter 2, vacuolar-like [Nelumbo nucifera]
LRWT_f2p0_1957_transcript31270_g6	PREDICTED: catalase isozyme 1 [Gossypium raimondii]
LRWT_f2p0_948_transcript67919_g6	PREDICTED: CASP-like protein 1D1 [Nelumbo nucifera]
LRWT_f8p0_905_transcript66353_g1	PREDICTED: CASP-like protein 1D1 [Nelumbo nucifera]
LRWT_f3p0_860_transcript71974_g4	PREDICTED: casparian strip membrane protein 2-like [Nelumbo nucifera]
LRWT_f5p0_866_transcript71442_g5	PREDICTED: casparian strip membrane protein 2-like [Nelumbo nucifera]
LRWT_f6p0_794_transcript74739_g1	PREDICTED: casparian strip membrane protein 2-like [Nelumbo nucifera]
LRWT_f8p0_2274_transcript23870_g1	PREDICTED: carotenoid 9,10(9',10')-cleavage dioxygenase 1-like [Citrus sinensis]
LRWT_f4p0_1720_transcript36003_g1	PREDICTED: capsanthin/capsorubin synthase, chromoplast-like [Nelumbo nucifera]
LRWT_f2p0_2160_transcript26690_g11	PREDICTED: calnexin homolog [Nelumbo nucifera]
LRWT_f3p0_755_transcript77149_g2	PREDICTED: calmodulin-like protein 3 [Nelumbo nucifera]
LRWT_f2p0_688_transcript81063_g10	PREDICTED: calmodulin-like protein 11 [Cicer arietinum]
LRWT_f2p0_505_transcript90825_g20	PREDICTED: calmodulin-like [Nelumbo nucifera]
LRWT_f13p0_705_transcript78727_g1	PREDICTED: calmodulin-4 [Vitis vinifera]
LRWT_f17p0_996_transcript65237_g1	PREDICTED: calcyclin-binding protein [Jatropha curcas]
LRWT_f4p0_3555_transcript7481_g1	PREDICTED: calcium-transporting ATPase, endoplasmic reticulum-type [Nelumbo nucifera]
LRWT_f4p0_506_transcript89247_g3	PREDICTED: calcium-binding protein PBP1-like [Nelumbo nucifera]
LRWT_f3p0_1860_transcript33822_g2	PREDICTED: caffeoylshikimate esterase-like [Nelumbo nucifera]
LRWT_f2p0_1751_transcript37752_g14	PREDICTED: caffeoylshikimate esterase-like [Nelumbo nucifera]
LRWT_f5p0_1500_transcript45812_g3	PREDICTED: caffeic acid 3-O-methyltransferase 1-like [Nelumbo nucifera]
LRWT_f73p0_1268_transcript51698_g1	PREDICTED: caffeic acid 3-O-methyltransferase 1-like [Nelumbo nucifera]
LRWT_f3p0_1219_transcript57099_g9	PREDICTED: caffeic acid 3-O-methyltransferase 1 [Ricinus communis]
LRWT_f11p0_1294_transcript52002_g1	PREDICTED: caffeic acid 3-O-methyltransferase [Solanum tuberosum]
LRWT_f7p0_1402_transcript49564_g3	PREDICTED: caffeic acid 3-O-methyltransferase [Glycine max]
LRWT_f10p0_1285_transcript53147_g1	PREDICTED: caffeic acid 3-O-methyltransferase [Cicer arietinum]
LRWT_f2p0_896_transcript70381_g8	PREDICTED: butyrate--CoA ligase AAE11, peroxisomal-like [Nelumbo nucifera]
LRWT_f6p0_1466_transcript47233_g6	PREDICTED: BTB/POZ and TAZ domain-containing protein 1 [Nelumbo nucifera]
LRWT_f5p0_956_transcript67497_g4	PREDICTED: brassinosteroid-regulated protein BRU1-like [Nelumbo nucifera]
LRWT_f2p0_2248_transcript24924_g3	PREDICTED: branched-chain-amino-acid aminotransferase-like protein 1 [Musa acuminata subsp. malaccensis]
LRWT_f2p0_724_transcript78677_g5	PREDICTED: blue copper protein-like [Nicotiana sylvestris]
LRWT_f9p0_891_transcript69087_g2	PREDICTED: blue copper protein-like [Cucumis melo]
LRWT_f12p0_833_transcript71300_g1	PREDICTED: blue copper protein [Vitis vinifera]
LRWT_f2p0_355_transcript98830_g2	PREDICTED: blue copper protein [Nelumbo nucifera]
LRWT_f2p0_1112_transcript61072_g12	PREDICTED: bifunctional epoxide hydrolase 2-like [Phoenix dactylifera]
LRWT_f9p0_1176_transcript58262_g1	PREDICTED: bifunctional epoxide hydrolase 2-like [Phoenix dactylifera]
LRWT_f25p0_1268_transcript51233_g1	PREDICTED: bifunctional epoxide hydrolase 2-like [Nelumbo nucifera]
LRWT_f6p0_1120_transcript60573_g3	PREDICTED: bifunctional epoxide hydrolase 2-like [Fragaria vesca subsp. vesca]
LRWT_f14p0_1080_transcript61913_g2	PREDICTED: bifunctional epoxide hydrolase 2-like [Eucalyptus grandis]
LRWT_f4p0_1710_transcript36833_g1	PREDICTED: bifunctional aspartate aminotransferase and glutamate/aspartate-prephenate aminotransferase-like [Vitis vinifera]
LRWT_f5p0_1886_transcript32955_g3	PREDICTED: bidirectional sugar transporter SWEET2 [Nelumbo nucifera]
LRWT_f2p0_1095_transcript61782_g9	PREDICTED: bidirectional sugar transporter SWEET17-like isoform X1 [Nelumbo nucifera]
LRWT_f2p0_1140_transcript59617_g3	PREDICTED: bidirectional sugar transporter SWEET14-like [Elaeis guineensis]
LRWT_f8p0_2054_transcript28032_g1	PREDICTED: beta-hexosaminidase 3-like [Nelumbo nucifera]
LRWT_f24p0_1719_transcript35940_g1	PREDICTED: beta-glucosidase 31-like [Phoenix dactylifera]
LRWT_f19p0_3159_transcript10510_g1	PREDICTED: beta-galactosidase isoform X2 [Nelumbo nucifera]
LRWT_f2p0_2086_transcript28208_g5	PREDICTED: beta-fructofuranosidase, insoluble isoenzyme 1-like [Nelumbo nucifera]
LRWT_f3p0_1559_transcript43867_g3	PREDICTED: benzyl alcohol O-benzoyltransferase-like [Cucumis sativus]
LRWT_f5p0_1611_transcript40761_g1	PREDICTED: benzyl alcohol O-benzoyltransferase [Nelumbo nucifera]
LRWT_f3p0_1603_transcript41843_g1	PREDICTED: benzyl alcohol O-benzoyltransferase [Nelumbo nucifera]
LRWT_f2p0_1554_transcript44074_g6	PREDICTED: benzyl alcohol O-benzoyltransferase [Nelumbo nucifera]
LRWT_f3p0_1152_transcript59763_g6	PREDICTED: B-box zinc finger protein 19 isoform X1 [Nelumbo nucifera]
LRWT_f33p0_974_transcript65861_g2	PREDICTED: bax inhibitor 1-like [Nelumbo nucifera]
LRWT_f6p0_1364_transcript49101_g1	PREDICTED: basic leucine zipper 9-like isoform X1 [Nelumbo nucifera]
LRWT_f17p0_1408_transcript48331_g2	PREDICTED: basic 7S globulin-like isoform X1 [Populus euphratica]
LRWT_f2p0_1466_transcript46914_g2	PREDICTED: basic 7S globulin-like [Tarenaya hassleriana]
LRWT_f4p0_1474_transcript46672_g3	PREDICTED: basic 7S globulin-like [Gossypium raimondii]
LRWT_f55p0_1496_transcript44277_g1	PREDICTED: basic 7S globulin 2-like [Nelumbo nucifera]
LRWT_f6p0_1430_transcript48198_g1	PREDICTED: basic 7S globulin 2-like [Nelumbo nucifera]
LRWT_f3p0_1591_transcript42646_g2	PREDICTED: basic 7S globulin 2-like [Nelumbo nucifera]
LRWT_f3p0_1425_transcript48779_g3	PREDICTED: basic 7S globulin [Vitis vinifera]
LRWT_f9p0_1264_transcript53895_g2	PREDICTED: bark storage protein A-like [Elaeis guineensis]
LRWT_f3p0_1176_transcript59530_g10	PREDICTED: bark storage protein A [Nelumbo nucifera]
LRWT_f34p0_528_transcript88854_g1	PREDICTED: auxin-responsive protein SAUR72-like [Solanum pennellii]
LRWT_f3p0_595_transcript86898_g6	PREDICTED: auxin-induced protein X15 [Amborella trichopoda]
LRWT_f2p0_3994_transcript4488_g1	PREDICTED: auxin response factor 5-like [Nelumbo nucifera]
LRWT_f3p0_2751_transcript16686_g1	PREDICTED: aureusidin synthase-like [Nelumbo nucifera]
LRWT_f15p0_1611_transcript41009_g1	PREDICTED: AT-rich interactive domain-containing protein 2-like [Nelumbo nucifera]
LRWT_f2p0_2381_transcript22549_g4	PREDICTED: ATP-dependent zinc metalloprotease FTSH 2, chloroplastic [Vitis vinifera]
LRWT_f2p0_2120_transcript27448_g6	PREDICTED: ATP-dependent 6-phosphofructokinase 5, chloroplastic-like [Nelumbo nucifera]
LRWT_f12p0_1682_transcript36165_g1	PREDICTED: ATP sulfurylase 1, chloroplastic [Nelumbo nucifera]
LRWT_f3p0_1751_transcript37303_g3	PREDICTED: aspartic proteinase nepenthesin-2 [Vitis vinifera]
LRWT_f2p0_1527_transcript45116_g13	PREDICTED: aspartate aminotransferase, cytoplasmic, partial [Nelumbo nucifera]
LRWT_f2p0_409_transcript95504_g1	PREDICTED: aspartate aminotransferase, cytoplasmic, partial [Nelumbo nucifera]
LRWT_f7p0_1698_transcript39127_g3	PREDICTED: aspartate aminotransferase, cytoplasmic, partial [Nelumbo nucifera]
LRWT_f4p0_1461_transcript47501_g4	PREDICTED: arogenate dehydrogenase 2, chloroplastic-like [Nelumbo nucifera]
LRWT_f2p0_1563_transcript43905_g10	PREDICTED: arogenate dehydrogenase 2, chloroplastic-like [Nelumbo nucifera]
LRWT_f2p0_1374_transcript50602_g2	PREDICTED: arogenate dehydrogenase 2, chloroplastic-like [Nelumbo nucifera]
LRWT_f2p0_1267_transcript54938_g12	PREDICTED: arogenate dehydrogenase 2, chloroplastic [Amborella trichopoda]
LRWT_f2p0_1014_transcript65149_g5	PREDICTED: arogenate dehydratase/prephenate dehydratase 6, chloroplastic-like [Sesamum indicum]
LRWT_f4p0_1608_transcript41432_g1	PREDICTED: arogenate dehydratase/prephenate dehydratase 6, chloroplastic-like [Nicotiana tomentosiformis]
LRWT_f20p0_1540_transcript43749_g2	PREDICTED: arogenate dehydratase/prephenate dehydratase 6, chloroplastic-like [Nelumbo nucifera]
LRWT_f2p0_1537_transcript44877_g11	PREDICTED: arogenate dehydratase/prephenate dehydratase 6, chloroplastic-like [Nelumbo nucifera]
LRWT_f2p0_1300_transcript53805_g16	PREDICTED: arogenate dehydratase/prephenate dehydratase 6, chloroplastic-like [Nelumbo nucifera]
LRWT_f2p0_2098_transcript27973_g6	PREDICTED: arogenate dehydratase/prephenate dehydratase 6, chloroplastic-like [Nelumbo nucifera]
LRWT_f15p0_1493_transcript46043_g1	PREDICTED: arogenate dehydratase/prephenate dehydratase 6, chloroplastic-like [Nelumbo nucifera]
LRWT_f4p0_1277_transcript54429_g7	PREDICTED: aquaporin PIP2-1-like [Populus euphratica]
LRWT_f103p0_1229_transcript52088_g1	PREDICTED: aquaporin PIP2-1-like [Populus euphratica]
LRWT_f2p0_2598_transcript19052_g2	PREDICTED: AP2-like ethylene-responsive transcription factor BBM1 [Nelumbo nucifera]
LRWT_f5p0_1414_transcript48856_g2	PREDICTED: AP2/ERF and B3 domain-containing transcription factor RAV1-like [Nelumbo nucifera]
LRWT_f21p0_1134_transcript57716_g1	PREDICTED: anthranilate synthase beta subunit 2, chloroplastic-like isoform X1 [Nelumbo nucifera]
LRWT_f12p0_1686_transcript37249_g1	PREDICTED: anthocyanin 5-aromatic acyltransferase-like [Nelumbo nucifera]
LRWT_f26p0_1126_transcript59469_g1	PREDICTED: annexin-like protein RJ4 [Nelumbo nucifera]
LRWT_f5p0_1239_transcript55843_g6	PREDICTED: annexin D4 [Vitis vinifera]
LRWT_f2p0_652_transcript82624_g11	PREDICTED: annexin D4 [Erythranthe guttata]
LRWT_f3p0_3351_transcript9470_g2	PREDICTED: AMP deaminase isoform X1 [Vitis vinifera]
LRWT_f2p0_1751_transcript37437_g11	PREDICTED: amino acid permease 3 [Nelumbo nucifera]
LRWT_f2p0_3202_transcript11083_g1	PREDICTED: alpha-glucan phosphorylase, H isozyme [Nelumbo nucifera]
LRWT_f6p0_1881_transcript33182_g1	PREDICTED: allene oxide synthase [Prunus mume]
LRWT_f10p0_1785_transcript33898_g1	PREDICTED: aldehyde dehydrogenase family 3 member H1-like isoform X1 [Nelumbo nucifera]
LRWT_f5p0_1948_transcript31487_g2	PREDICTED: aldehyde dehydrogenase family 2 member C4-like [Nelumbo nucifera]
LRWT_f2p0_1380_transcript50448_g9	PREDICTED: alcohol dehydrogenase-like 7 [Nelumbo nucifera]
LRWT_f3p0_1187_transcript58197_g3	PREDICTED: alcohol dehydrogenase 1-like [Nelumbo nucifera]
LRWT_f38p0_1366_transcript47017_g1	PREDICTED: alcohol dehydrogenase 1-like [Nelumbo nucifera]
LRWT_f3p0_1698_transcript39197_g4	PREDICTED: alanine--glyoxylate aminotransferase 2 homolog 2, mitochondrial-like [Jatropha curcas]
LRWT_f58p0_1753_transcript34598_g1	PREDICTED: alanine aminotransferase 2-like [Nelumbo nucifera]
LRWT_f2p0_1519_transcript44885_g2	PREDICTED: agmatine coumaroyltransferase-2-like [Nelumbo nucifera]
LRWT_f3p0_1467_transcript47305_g5	PREDICTED: agmatine coumaroyltransferase-2-like [Nelumbo nucifera]
LRWT_f19p0_701_transcript78734_g1	PREDICTED: adrenodoxin-like protein, mitochondrial [Sesamum indicum]
LRWT_f53p0_1519_transcript42219_g1	PREDICTED: ADP,ATP carrier protein 1, mitochondrial [Nelumbo nucifera]
LRWT_f2p0_1464_transcript47525_g11	PREDICTED: adenylyl-sulfate kinase 3-like isoform X1 [Nelumbo nucifera]
LRWT_f2p0_396_transcript96510_g2	PREDICTED: adenosylhomocysteinase-like [Nicotiana tomentosiformis]
LRWT_f2p0_1447_transcript48039_g14	PREDICTED: adenosine deaminase-like protein isoform X1 [Nelumbo nucifera]
LRWT_f2p0_1490_transcript46431_g7	PREDICTED: adenosine deaminase-like protein isoform X1 [Nelumbo nucifera]
LRWT_f24p0_1711_transcript36208_g1	PREDICTED: acyl-coenzyme A oxidase 4, peroxisomal [Phoenix dactylifera]
LRWT_f3p0_3551_transcript7549_g2	PREDICTED: aconitate hydratase, cytoplasmic [Nelumbo nucifera]
LRWT_f2p0_3570_transcript6556_g1	PREDICTED: aconitate hydratase, cytoplasmic [Cucumis melo]
LRWT_f2p0_1092_transcript61908_g15	PREDICTED: acidic endochitinase [Vitis vinifera]
LRWT_f2p0_1269_transcript54208_g4	PREDICTED: acid phosphatase 1-like [Nelumbo nucifera]
LRWT_f14p0_847_transcript71066_g2	PREDICTED: acid phosphatase 1-like [Nelumbo nucifera]
LRWT_f2p0_1339_transcript52174_g17	PREDICTED: acetylajmalan esterase-like [Nelumbo nucifera]
LRWT_f2p0_991_transcript66049_g5	PREDICTED: abscisic acid receptor PYL4 [Jatropha curcas]
LRWT_f2p0_1849_transcript34261_g4	PREDICTED: abscisic acid 8'-hydroxylase 1-like, partial [Nelumbo nucifera]
LRWT_f5p0_1135_transcript60164_g2	PREDICTED: abl interactor homolog [Nelumbo nucifera]
LRWT_f2p0_1896_transcript32906_g7	PREDICTED: abietadienol/abietadienal oxidase-like [Glycine max]
LRWT_f2p0_2246_transcript24824_g2	PREDICTED: ABC transporter G family member 14 [Nelumbo nucifera]
LRWT_f4p0_3335_transcript9249_g1	PREDICTED: ABC transporter G family member 11-like [Vitis vinifera]
LRWT_f4p0_4814_transcript1750_g1	PREDICTED: ABC transporter C family member 10-like [Eucalyptus grandis]
LRWT_f5p0_4613_transcript2235_g1	PREDICTED: ABC transporter C family member 10-like [Citrus sinensis]
LRWT_f8p0_4831_transcript1601_g1	PREDICTED: ABC transporter C family member 10-like [Citrus sinensis]
LRWT_f8p0_4307_transcript2807_g1	PREDICTED: ABC transporter B family member 15-like [Nelumbo nucifera]
LRWT_f3p0_631_transcript83558_g2	PREDICTED: ABC transporter A family member 7-like isoform X2 [Nicotiana sylvestris]
LRWT_f6p0_1818_transcript34535_g2	PREDICTED: 7-deoxyloganetin glucosyltransferase-like [Populus euphratica]
LRWT_f6p0_1701_transcript38003_g1	PREDICTED: 7-deoxyloganetin glucosyltransferase-like [Populus euphratica]
LRWT_f20p0_1528_transcript44416_g1	PREDICTED: 7-deoxyloganetin glucosyltransferase-like [Populus euphratica]
LRWT_f9p0_1773_transcript34101_g1	PREDICTED: 7-deoxyloganetin glucosyltransferase-like [Nelumbo nucifera]
LRWT_f5p0_1685_transcript39409_g5	PREDICTED: 7-deoxyloganetin glucosyltransferase-like [Nelumbo nucifera]
LRWT_f3p0_1785_transcript36132_g2	PREDICTED: 7-deoxyloganetin glucosyltransferase-like [Jatropha curcas]
LRWT_f5p0_1797_transcript35493_g2	PREDICTED: 6-phosphogluconate dehydrogenase, decarboxylating 2, chloroplastic [Nelumbo nucifera]
LRWT_f2p0_810_transcript74307_g2	PREDICTED: 60S ribosomal protein L22-2 [Fragaria vesca subsp. vesca]
LRWT_f2p0_799_transcript75977_g19	PREDICTED: 60S ribosomal protein L19-3 [Nelumbo nucifera]
LRWT_f2p0_797_transcript75021_g8	PREDICTED: 60S ribosomal protein L10 [Vitis vinifera]
LRWT_f3p0_933_transcript68594_g1	PREDICTED: 6,7-dimethyl-8-ribityllumazine synthase, chloroplastic [Nelumbo nucifera]
LRWT_f21p0_1581_transcript41806_g1	PREDICTED: 5'-adenylylsulfate reductase 3, chloroplastic-like [Solanum pennellii]
LRWT_f119p0_1623_transcript38924_g1	PREDICTED: 5'-adenylylsulfate reductase 3, chloroplastic-like [Solanum pennellii]
LRWT_f7p0_398_transcript95505_g3	PREDICTED: 4-coumarate--CoA ligase-like 9 [Populus euphratica]
LRWT_f2p0_1052_transcript63947_g15	PREDICTED: 40S ribosomal protein S5 [Fragaria vesca subsp. vesca]
LRWT_f2p0_1779_transcript35669_g1	PREDICTED: 40S ribosomal protein S4-3-like [Camelina sativa]
LRWT_f7p0_647_transcript81812_g1	PREDICTED: 40S ribosomal protein S27-2-like [Nelumbo nucifera]
LRWT_f2p0_759_transcript76951_g12	PREDICTED: 40S ribosomal protein S13-like [Erythranthe guttata]
LRWT_f3p0_699_transcript80082_g3	PREDICTED: 40S ribosomal protein S13 [Beta vulgaris subsp. vulgaris]
LRWT_f14p0_1847_transcript34187_g1	PREDICTED: 3-ketoacyl-CoA thiolase 2, peroxisomal [Solanum lycopersicum]
LRWT_f7p0_1315_transcript51534_g2	PREDICTED: 39S ribosomal protein L4, mitochondrial isoform X1 [Nelumbo nucifera]
LRWT_f12p0_666_transcript79410_g1	PREDICTED: 36.4 kDa proline-rich protein [Vitis vinifera]
LRWT_f3p0_1152_transcript59584_g4	PREDICTED: 2-aminoethanethiol dioxygenase-like isoform X4 [Elaeis guineensis]
LRWT_f5p0_747_transcript74555_g1	PREDICTED: 21 kDa protein-like [Nelumbo nucifera]
LRWT_f2p0_955_transcript67808_g9	PREDICTED: 21 kDa protein [Vitis vinifera]
LRWT_f2p0_723_transcript78740_g6	PREDICTED: 21 kDa protein [Prunus mume]
LRWT_f2p0_718_transcript79004_g2	PREDICTED: 21 kDa protein [Prunus mume]
LRWT_f2p0_871_transcript66171_g1	PREDICTED: 21 kDa protein [Fragaria vesca subsp. vesca]
LRWT_f3p0_2146_transcript26945_g1	PREDICTED: 2,3-bisphosphoglycerate-independent phosphoglycerate mutase [Sesamum indicum]
LRWT_f23p0_1981_transcript29198_g1	PREDICTED: 1-aminocyclopropane-1-carboxylate synthase-like [Pyrus x bretschneideri]
LRWT_f2p0_1208_transcript57333_g7	PREDICTED: 1-aminocyclopropane-1-carboxylate oxidase homolog 1-like [Solanum pennellii]
LRWT_f2p0_1475_transcript46973_g11	PREDICTED: 1-aminocyclopropane-1-carboxylate oxidase homolog 1-like [Populus euphratica]
LRWT_f2p0_1393_transcript49365_g2	PREDICTED: 1-aminocyclopropane-1-carboxylate oxidase homolog 1-like [Malus domestica]
LRWT_f4p0_1380_transcript50105_g4	PREDICTED: 1-aminocyclopropane-1-carboxylate oxidase homolog 1-like [Malus domestica]
LRWT_f53p0_1352_transcript49894_g1	PREDICTED: 1-aminocyclopropane-1-carboxylate oxidase homolog 1-like [Citrus sinensis]
LRWT_f3p0_1356_transcript51098_g2	PREDICTED: 1-aminocyclopropane-1-carboxylate oxidase 5 [Nelumbo nucifera]
LRWT_f4p0_1061_transcript62799_g3	PREDICTED: 1-aminocyclopropane-1-carboxylate oxidase 1 [Vitis vinifera]
LRWT_f4p0_1327_transcript52308_g8	PREDICTED: 1-aminocyclopropane-1-carboxylate oxidase 1 [Citrus sinensis]
LRWT_f2p0_1397_transcript49856_g7	PREDICTED: 1-aminocyclopropane-1-carboxylate oxidase 1 [Citrus sinensis]
LRWT_f10p0_683_transcript75614_g1	PREDICTED: 17.8 kDa class I heat shock protein-like [Jatropha curcas]
LRWT_f2p0_670_transcript81571_g7	PREDICTED: 17.8 kDa class I heat shock protein-like [Erythranthe guttata]
LRWT_f2p0_878_transcript71426_g21	PREDICTED: 17.4 kDa class III heat shock protein [Glycine max]
LRWT_f11p0_684_transcript77036_g1	PREDICTED: 17.3 kDa class I heat shock protein-like [Nelumbo nucifera]
LRWT_f3p0_812_transcript74259_g7	PREDICTED: 17.3 kDa class I heat shock protein-like [Nelumbo nucifera]
LRWT_f21p0_761_transcript75524_g2	PREDICTED: 17.3 kDa class I heat shock protein-like [Musa acuminata subsp. malaccensis]
LRWT_f2p0_704_transcript79674_g3	PREDICTED: 17.3 kDa class I heat shock protein-like [Erythranthe guttata]
LRWT_f7p0_695_transcript77068_g1	PREDICTED: 17.3 kDa class I heat shock protein-like [Erythranthe guttata]
LRWT_f2p0_696_transcript81451_g26	PREDICTED: 17.3 kDa class I heat shock protein-like [Erythranthe guttata]
LRWT_f5p0_730_transcript76118_g1	PREDICTED: 17.3 kDa class I heat shock protein-like [Erythranthe guttata]
LRWT_f3p0_761_transcript76812_g3	PREDICTED: 17.3 kDa class I heat shock protein-like [Erythranthe guttata]
LRWT_f3p0_707_transcript79515_g2	PREDICTED: 17.3 kDa class I heat shock protein-like [Erythranthe guttata]
LRWT_f5p0_672_transcript81178_g3	PREDICTED: 17.3 kDa class I heat shock protein-like [Erythranthe guttata]
LRWT_f28p0_680_transcript75921_g1	PREDICTED: 17.3 kDa class I heat shock protein-like [Erythranthe guttata]
LRWT_f4p0_698_transcript79555_g5	PREDICTED: 17.3 kDa class I heat shock protein-like [Erythranthe guttata]
LRWT_f22p0_700_transcript75530_g1	PREDICTED: 17.1 kDa class II heat shock protein-like [Pyrus x bretschneideri]
LRWT_f23p0_572_transcript84056_g1	PREDICTED: 15.7 kDa heat shock protein, peroxisomal [Nelumbo nucifera]
LRWT_f2p0_886_transcript70816_g20	PREDICTED: 14-3-3-like protein [Nelumbo nucifera]
LRWT_f7p0_743_transcript76994_g1	PREDICTED: 14 kDa proline-rich protein DC2.15-like [Sesamum indicum]
LRWT_f2p0_820_transcript73848_g7	PREDICTED: 14 kDa proline-rich protein DC2.15-like [Sesamum indicum]
LRWT_f2p0_811_transcript74246_g4	PREDICTED: 14 kDa proline-rich protein DC2.15-like [Sesamum indicum]
LRWT_f7p0_642_transcript82931_g1	PREDICTED: 14 kDa proline-rich protein DC2.15-like [Sesamum indicum]
LRWT_f5p0_709_transcript79420_g5	PREDICTED: 14 kDa proline-rich protein DC2.15-like [Pyrus x bretschneideri]
LRWT_f19p0_644_transcript82224_g1	PREDICTED: 14 kDa proline-rich protein DC2.15-like [Nicotiana sylvestris]
LRWT_f19p0_674_transcript80401_g1	PREDICTED: 14 kDa proline-rich protein DC2.15-like [Nicotiana sylvestris]
LRWT_f7p0_397_transcript95056_g1	PREDICTED: 14 kDa proline-rich protein DC2.15-like [Nelumbo nucifera]
LRWT_f17p0_673_transcript79876_g1	PREDICTED: 14 kDa proline-rich protein DC2.15-like [Citrus sinensis]
LRWT_f22p0_529_transcript87344_g1	PREDICTED: 14 kDa proline-rich protein DC2.15 [Vitis vinifera]
LRWT_f3p0_453_transcript94530_g15	PREDICTED: 14 kDa proline-rich protein DC2.15 [Nelumbo nucifera]
LRWT_f14p0_566_transcript86217_g1	PREDICTED: 14 kDa proline-rich protein DC2.15 [Nelumbo nucifera]
LRWT_f2p0_1713_transcript39401_g14	PREDICTED: 12-oxophytodienoate reductase 2-like [Prunus mume]
LRWT_f2p0_1323_transcript52718_g10	PREDICTED: 11S globulin seed storage protein 2-like [Nelumbo nucifera]
LRWT_f12p0_1268_transcript51214_g1	PREDICTED: 11S globulin seed storage protein 2-like [Nelumbo nucifera]
LRWT_f60p0_496_transcript86497_g1	PREDICTED: 10 kDa chaperonin-like isoform X1 [Elaeis guineensis]
LRWT_f37p0_688_transcript79088_g1	PREDICTED: 10 kDa chaperonin [Solanum tuberosum]
LRWT_f2p0_868_transcript71612_g7	PREDICTED: 1,2-dihydroxy-3-keto-5-methylthiopentene dioxygenase 1 [Vitis vinifera]
LRWT_f4p0_1139_transcript59989_g5	PREDICTED: (+)-neomenthol dehydrogenase-like [Nelumbo nucifera]
LRWT_f2p0_1196_transcript57852_g11	PREDICTED: (-)-alpha-terpineol synthase [Vitis vinifera]
LRWT_f2p0_1788_transcript36080_g8	Polyubiquitin-A [Triticum urartu]
LRWT_f2p0_1471_transcript47096_g3	Polyubiquitin [Triticum urartu]
LRWT_f84p0_4677_transcript1586_g1	polyprotein [Phaseolus vulgaris]
LRWT_f24p0_2008_transcript28809_g1	polyphenol oxidase [Sinopodophyllum hexandrum]
LRWT_f8p0_1976_transcript30079_g1	polyphenol oxidase [Sinopodophyllum hexandrum]
LRWT_f8p0_957_transcript67523_g1	Polyketide cyclase/dehydrase and lipid transport superfamily protein [Theobroma cacao]
LRWT_f11p0_1203_transcript56418_g1	polygalacturonase-inhibiting protein [Pyrus pyrifolia]
LRWT_f9p0_1280_transcript53994_g2	Polygalacturonase-inhibiting protein [Cucumis sativus]
LRWT_f2p0_1236_transcript56051_g3	polygalacturonase-inhibiting protein [Cucumis melo subsp. agrestis]
LRWT_f2p0_1141_transcript60014_g13	Polygalacturonase precursor family protein [Populus trichocarpa]
LRWT_f7p0_1356_transcript50026_g2	polygalacturonase inhibitor [Actinidia deliciosa]
LRWT_f10p0_1253_transcript53566_g1	polygalacturonase inhibitor (PGIP) [Citrus iyo]
LRWT_f7p0_1932_transcript31811_g1	POLLEN-PISTIL INTERACTION 2 family protein [Populus trichocarpa]
LRWT_f14p0_1282_transcript53279_g1	pluviatolide O-methyltransferase [Sinopodophyllum hexandrum]
LRWT_f3p0_899_transcript70178_g6	plastid jasmonates ZIM-domain protein [Hevea brasiliensis]
LRWT_f4p0_719_transcript78330_g1	Plant invertase/pectin methylesterase inhibitor superfamily protein, putative [Theobroma cacao]
LRWT_f3p0_883_transcript70872_g1	plant disease resistance response protein, partial [Populus balsamifera]
LRWT_f9p0_734_transcript77049_g2	Plant disease resistance response protein [Cynara cardunculus var. scolymus]
LRWT_f2p0_699_transcript80050_g13	PLAC8 family protein, putative [Theobroma cacao]
LRWT_f2p0_3758_transcript5983_g3	phytochrome A [Aquilegia formosa]
LRWT_f10p0_1447_transcript47254_g1	phospholipase A2 [Eschscholzia californica]
LRWT_f30p0_2236_transcript22352_g1	Phosphoenolpyruvate carboxylase [Morus notabilis]
LRWT_f2p0_1996_transcript30451_g11	phospho-2-dehydro-3-deoxyheptonate aldolase [Medicago truncatula]
LRWT_f23p0_2413_transcript20626_g1	phenylalanine ammonium lyase [Morus alba]
LRWT_f5p0_2427_transcript21359_g2	phenylalanine ammonia-lyase [Lactuca sativa]
LRWT_f3p0_2440_transcript21546_g3	phenylalanine ammonia lyase [Morus alba var. multicaulis]
LRWT_f30p0_1161_transcript58822_g1	Peroxidase superfamily protein [Theobroma cacao]
LRWT_f15p0_1131_transcript60024_g1	Peroxidase superfamily protein [Theobroma cacao]
LRWT_f2p0_1333_transcript52250_g9	Peroxidase superfamily protein [Theobroma cacao]
LRWT_f13p0_1113_transcript60499_g3	Peroxidase N1 [Theobroma cacao]
LRWT_f2p0_1226_transcript56531_g9	Peroxidase 9 -like protein [Gossypium arboreum]
LRWT_f3p0_456_transcript93127_g1	peptidoglycan-binding LysM domain protein [Medicago truncatula]
LRWT_f2p0_814_transcript74242_g16	pathogenesis-related protein 1 [Zea mays]
LRWT_f75p0_670_transcript80533_g1	pathogenesis-related protein 1 [Zea mays]
LRWT_f11p0_701_transcript79755_g2	pathogenesis-related protein 1 [Zea mays]
LRWT_f3p0_425_transcript95021_g6	Pathogenesis-related protein 1 [Triticum urartu]
LRWT_f2p0_455_transcript93234_g15	Pathogenesis-related protein 1 [Aegilops tauschii]
LRWT_f2p0_891_transcript70679_g18	pathogenesis-related (PR)-10-related norcoclaurine synthase-like protein [Eschscholzia californica]
LRWT_f2p0_449_transcript93580_g13	pathogenesis-related (PR)-10-related norcoclaurine synthase-like protein [Eschscholzia californica]
LRWT_f2p0_722_transcript78848_g17	pathogenesis-related (PR)-10-related norcoclaurine synthase-like protein [Eschscholzia californica]
LRWT_f2p0_1788_transcript36078_g7	papain-like cysteine protease [Fagopyrum esculentum]
LRWT_f3p0_1918_transcript32325_g1	papain-like cysteine protease [Fagopyrum esculentum]
LRWT_f25p0_1382_transcript49735_g1	oxidoreductase family protein [Populus trichocarpa]
LRWT_f2p0_1296_transcript52155_g1	oxidoreductase family protein [Populus trichocarpa]
LRWT_f3p0_1197_transcript57956_g6	oxidoreductase family protein [Populus trichocarpa]
LRWT_f10p0_965_transcript65267_g1	osmotin, partial [Morus alba]
LRWT_f10p0_1545_transcript43029_g3	Os06g0681400, partial [Oryza sativa Japonica Group]
LRWT_f3p0_1628_transcript40379_g1	Os06g0681400, partial [Oryza sativa Japonica Group]
LRWT_f5p0_1300_transcript53182_g1	orcinol O-methyltransferase [Rosa hybrid cultivar]
LRWT_f2p0_1403_transcript49411_g3	O-methyltransferase [Thalictrum tuberosum]
LRWT_f19p0_709_transcript78423_g1	Oleosin 1 [Morus notabilis]
LRWT_f3p0_1371_transcript50788_g4	Nodulin MtN21 /EamA transporter family protein [Theobroma cacao]
LRWT_f2p0_1333_transcript52136_g4	Nodulin MtN21 /EamA transporter family protein [Theobroma cacao]
LRWT_f6p0_1644_transcript39664_g1	nodulin family protein [Populus trichocarpa]
LRWT_f394p0_2926_transcript10928_g1	nitrate reductase [NADH]-like [Vitis vinifera]
LRWT_f3p0_1338_transcript52045_g4	Nicotinamidase 1 isoform 1 [Theobroma cacao]
LRWT_f3p0_1564_transcript43722_g3	NADP-specific glutamate dehydrogenase [Medicago truncatula]
LRWT_f3p0_1580_transcript42902_g1	NADP-specific glutamate dehydrogenase [Medicago truncatula]
LRWT_f25p0_1303_transcript52276_g2	NAC domain-containing protein 2 [Morus notabilis]
LRWT_f2p0_1238_transcript56064_g6	Myb domain protein 36 [Theobroma cacao]
LRWT_f10p0_1720_transcript36620_g1	Multidrug and toxin extrusion protein 1 [Theobroma cacao]
LRWT_f5p0_667_transcript78808_g1	Mss4-like protein [Cynara cardunculus var. scolymus]
LRWT_f2p0_1520_transcript45391_g7	Mss4-like protein [Cynara cardunculus var. scolymus]
LRWT_f3p0_762_transcript76792_g3	MLP-like protein 34, putative [Theobroma cacao]
LRWT_f136p0_743_transcript76310_g1	MLP-like protein 34 isoform 1 [Theobroma cacao]
LRWT_f5p0_1253_transcript53045_g1	mitochondrial alternative oxidase 2a [Daucus carota]
LRWT_f5p0_2687_transcript17606_g2	methionine synthase [Camellia sinensis]
LRWT_f3p0_2895_transcript14800_g2	methionine synthase [Camellia sinensis]
LRWT_f6p0_2772_transcript16121_g2	methionine synthase [Camellia sinensis]
LRWT_f2p0_622_transcript84888_g12	metallothionein [Coptis japonica]
LRWT_f4p0_1473_transcript46835_g3	metacaspase-5-like [Vitis vinifera]
LRWT_f3p0_680_transcript81142_g5	mannose specific lectin [Dioscorea polystachya]
LRWT_f53p0_1768_transcript36023_g1	Major facilitator superfamily protein isoform 1 [Theobroma cacao]
LRWT_f3p0_1969_transcript31018_g1	Major facilitator superfamily protein [Theobroma cacao]
LRWT_f47p0_1863_transcript32559_g1	Major facilitator superfamily protein [Theobroma cacao]
LRWT_f2p0_981_transcript66547_g12	LURP-one-related 8, putative [Theobroma cacao]
LRWT_f2p0_2249_transcript23964_g1	luminal binding protein [Gossypium hirsutum]
LRWT_f5p0_3347_transcript9402_g1	LRR.XII-like protein, partial [Platanus x acerifolia]
LRWT_f5p0_3304_transcript9428_g1	LRR.XII-like protein, partial [Platanus x acerifolia]
LRWT_f2p0_566_transcript87137_g3	LOW QUALITY PROTEIN: protein translation factor SUI1 [Zea mays]
LRWT_f3p0_2985_transcript13612_g2	lipoxygenase [Camellia sinensis]
LRWT_f7p0_2870_transcript14850_g1	lipoxygenase [Camellia sinensis]
LRWT_f4p0_1979_transcript29295_g1	limonene synthase [Eleutherococcus trifoliatus]
LRWT_f3p0_3440_transcript8544_g1	Leucine-rich repeat transmembrane protein kinase [Theobroma cacao]
LRWT_f6p0_757_transcript76270_g3	lectin, partial [Galanthus nivalis]
LRWT_f70p0_634_transcript81083_g2	lectin, partial [Clivia miniata]
LRWT_f2p0_966_transcript67057_g2	Lateral organ boundaries-domain 16 [Theobroma cacao]
LRWT_f3p0_1683_transcript39554_g2	Late embryogenesis abundant (LEA) protein-related [Theobroma cacao]
LRWT_f9p0_1506_transcript44756_g1	Lactosylceramide 4-alpha-galactosyltransferase, putative [Theobroma cacao]
LRWT_f5p0_2009_transcript29480_g2	laccase 7 [Dimocarpus longan]
LRWT_f2p0_6358_transcript429_g1	Kinase interacting (KIP1-like) family protein, putative [Theobroma cacao]
LRWT_f2p0_1569_transcript43704_g11	isocitrate dehydrogenase family protein [Populus trichocarpa]
LRWT_f2p0_1943_transcript31615_g6	isocitrate dehydrogenase family protein [Populus trichocarpa]
LRWT_f16p0_2022_transcript28476_g1	Indole-3-acetic acid-amido synthetase GH3.5, putative isoform 1 [Theobroma cacao]
LRWT_f3p0_500_transcript90767_g5	hypothetical protein ZOSMA_76G00900 [Zostera marina]
LRWT_f5p0_2196_transcript25825_g2	hypothetical protein VOLCADRAFT_69961 [Volvox carteri f. nagariensis]
LRWT_f19p0_958_transcript66426_g1	hypothetical protein VITISV_044257 [Vitis vinifera]
LRWT_f10p0_859_transcript69664_g1	hypothetical protein VITISV_044257 [Vitis vinifera]
LRWT_f2p0_1176_transcript55082_g1	hypothetical protein VITISV_044031 [Vitis vinifera]
LRWT_f5p0_2011_transcript29781_g1	hypothetical protein VITISV_039936 [Vitis vinifera]
LRWT_f3p0_772_transcript76291_g3	hypothetical protein VITISV_038846 [Vitis vinifera]
LRWT_f5p0_1062_transcript63071_g2	hypothetical protein VITISV_036640 [Vitis vinifera]
LRWT_f7p0_5199_transcript1231_g1	hypothetical protein VITISV_032357 [Vitis vinifera]
LRWT_f3p0_1351_transcript51538_g2	hypothetical protein VITISV_028023 [Vitis vinifera]
LRWT_f2p0_1440_transcript48210_g2	hypothetical protein VITISV_027452 [Vitis vinifera]
LRWT_f4p0_1300_transcript53338_g3	hypothetical protein VITISV_026363 [Vitis vinifera]
LRWT_f2p0_857_transcript72121_g12	hypothetical protein VITISV_019370 [Vitis vinifera]
LRWT_f4p0_769_transcript76261_g6	hypothetical protein VITISV_019370 [Vitis vinifera]
LRWT_f3p0_3886_transcript5077_g1	hypothetical protein VITISV_013115 [Vitis vinifera]
LRWT_f4p0_953_transcript67663_g4	hypothetical protein VITISV_012682 [Vitis vinifera]
LRWT_f2p0_1170_transcript57813_g2	hypothetical protein VITISV_006466 [Vitis vinifera]
LRWT_f4p0_1277_transcript54201_g5	hypothetical protein VITISV_006466 [Vitis vinifera]
LRWT_f2p0_1607_transcript42226_g6	hypothetical protein VITISV_003948 [Vitis vinifera]
LRWT_f2p0_1584_transcript43105_g6	hypothetical protein VITISV_003948 [Vitis vinifera]
LRWT_f4p0_1615_transcript41960_g6	hypothetical protein VITISV_003948 [Vitis vinifera]
LRWT_f2p0_2139_transcript27108_g4	hypothetical protein VITISV_003708 [Vitis vinifera]
LRWT_f2p0_3588_transcript7219_g2	hypothetical protein VITISV_001313 [Vitis vinifera]
LRWT_f3p0_1193_transcript57623_g2	hypothetical protein VIGAN_09224600 [Vigna angularis var. angularis]
LRWT_f7p0_495_transcript89803_g1	hypothetical protein VIGAN_07220400 [Vigna angularis var. angularis]
LRWT_f3p0_1779_transcript36828_g7	hypothetical protein VIGAN_05107500 [Vigna angularis var. angularis]
LRWT_f3p0_1315_transcript53014_g8	hypothetical protein VIGAN_02168900 [Vigna angularis var. angularis]
LRWT_f2p0_2233_transcript25245_g3	hypothetical protein VIGAN_02111200 [Vigna angularis var. angularis]
LRWT_f2p0_935_transcript68692_g20	hypothetical protein SOVF_151080 [Spinacia oleracea]
LRWT_f5p0_920_transcript67339_g1	hypothetical protein SOVF_151080 [Spinacia oleracea]
LRWT_f2p0_1403_transcript49932_g17	hypothetical protein SOVF_091780 [Spinacia oleracea]
LRWT_f5p0_1679_transcript39247_g1	hypothetical protein SOVF_089260 [Spinacia oleracea]
LRWT_f2p0_635_transcript83595_g15	hypothetical protein SOVF_085800 [Spinacia oleracea]
LRWT_f18p0_670_transcript80828_g1	hypothetical protein SOVF_048310 [Spinacia oleracea]
LRWT_f4p0_857_transcript72090_g6	hypothetical protein SORBI_008G136800 [Sorghum bicolor]
LRWT_f2p0_546_transcript88289_g21	hypothetical protein SETIT_037563mg [Setaria italica]
LRWT_f5p0_764_transcript76571_g3	hypothetical protein SETIT_003829mg, partial [Setaria italica]
LRWT_f101p0_467_transcript91376_g1	hypothetical protein PRUPE_ppb021781mg [Prunus persica]
LRWT_f2p0_1958_transcript31757_g8	hypothetical protein PRUPE_ppa025199mg [Prunus persica]
LRWT_f37p0_1198_transcript55203_g1	hypothetical protein PRUPE_ppa025199mg [Prunus persica]
LRWT_f2p0_774_transcript76357_g10	hypothetical protein PRUPE_ppa024679mg [Prunus persica]
LRWT_f8p0_1702_transcript35759_g1	hypothetical protein PRUPE_ppa024271mg [Prunus persica]
LRWT_f13p0_1835_transcript34420_g1	hypothetical protein PRUPE_ppa023692mg [Prunus persica]
LRWT_f5p0_939_transcript68517_g4	hypothetical protein PRUPE_ppa022354mg [Prunus persica]
LRWT_f2p0_1632_transcript41379_g6	hypothetical protein PRUPE_ppa022258mg [Prunus persica]
LRWT_f23p0_1320_transcript51929_g1	hypothetical protein PRUPE_ppa021358mg [Prunus persica]
LRWT_f2p0_1566_transcript43733_g14	hypothetical protein PRUPE_ppa018158mg, partial [Prunus persica]
LRWT_f2p0_915_transcript67447_g1	hypothetical protein PRUPE_ppa014210mg [Prunus persica]
LRWT_f9p0_542_transcript86340_g1	hypothetical protein PRUPE_ppa013901mg [Prunus persica]
LRWT_f2p0_558_transcript87593_g17	hypothetical protein PRUPE_ppa013062mg [Prunus persica]
LRWT_f6p0_587_transcript85957_g7	hypothetical protein PRUPE_ppa013062mg [Prunus persica]
LRWT_f35p0_622_transcript82453_g1	hypothetical protein PRUPE_ppa013062mg [Prunus persica]
LRWT_f8p0_817_transcript72224_g1	hypothetical protein PRUPE_ppa012501mg [Prunus persica]
LRWT_f233p0_916_transcript66215_g1	hypothetical protein PRUPE_ppa011249mg [Prunus persica]
LRWT_f2p0_1005_transcript65593_g16	hypothetical protein PRUPE_ppa011249mg [Prunus persica]
LRWT_f2p0_880_transcript71195_g13	hypothetical protein PRUPE_ppa011249mg [Prunus persica]
LRWT_f2p0_1103_transcript61678_g22	hypothetical protein PRUPE_ppa011249mg [Prunus persica]
LRWT_f3p0_1027_transcript64485_g3	hypothetical protein PRUPE_ppa011249mg [Prunus persica]
LRWT_f8p0_899_transcript69383_g2	hypothetical protein PRUPE_ppa011249mg [Prunus persica]
LRWT_f3p0_1092_transcript61903_g1	hypothetical protein PRUPE_ppa008997mg [Prunus persica]
LRWT_f11p0_1659_transcript40142_g1	hypothetical protein PRUPE_ppa007852mg [Prunus persica]
LRWT_f7p0_1322_transcript50222_g1	hypothetical protein PRUPE_ppa007687mg [Prunus persica]
LRWT_f104p0_1279_transcript52481_g1	hypothetical protein PRUPE_ppa007511mg [Prunus persica]
LRWT_f4p0_1669_transcript39979_g2	hypothetical protein PRUPE_ppa007378mg [Prunus persica]
LRWT_f8p0_1562_transcript42254_g1	hypothetical protein PRUPE_ppa005583mg [Prunus persica]
LRWT_f5p0_1865_transcript33413_g2	hypothetical protein PRUPE_ppa004911mg [Prunus persica]
LRWT_f2p0_991_transcript66107_g10	hypothetical protein PRUPE_ppa004627mg [Prunus persica]
LRWT_f2p0_2044_transcript29171_g5	hypothetical protein PRUPE_ppa003411mg [Prunus persica]
LRWT_f27p0_2286_transcript23557_g1	hypothetical protein PRUPE_ppa001976mg [Prunus persica]
LRWT_f2p0_3267_transcript10088_g2	hypothetical protein PRUPE_ppa001147mg [Prunus persica]
LRWT_f6p0_2649_transcript18081_g3	hypothetical protein POPTR_0024s00730g [Populus trichocarpa]
LRWT_f2p0_790_transcript74728_g3	hypothetical protein POPTR_0019s01630g [Populus trichocarpa]
LRWT_f8p0_477_transcript91007_g2	hypothetical protein POPTR_0019s01610g [Populus trichocarpa]
LRWT_f2p0_356_transcript98789_g8	hypothetical protein POPTR_0016s06300g [Populus trichocarpa]
LRWT_f6p0_524_transcript89016_g3	hypothetical protein POPTR_0016s05620g, partial [Populus trichocarpa]
LRWT_f2p0_1915_transcript32437_g11	hypothetical protein POPTR_0016s05030g [Populus trichocarpa]
LRWT_f6p0_1799_transcript35655_g4	hypothetical protein POPTR_0015s13090g [Populus trichocarpa]
LRWT_f2p0_863_transcript72126_g15	hypothetical protein POPTR_0015s00280g [Populus trichocarpa]
LRWT_f2p0_1358_transcript51292_g8	hypothetical protein POPTR_0013s06650g [Populus trichocarpa]
LRWT_f2p0_1727_transcript38054_g7	hypothetical protein POPTR_0012s09140g [Populus trichocarpa]
LRWT_f3p0_1315_transcript53165_g11	hypothetical protein POPTR_0012s02230g [Populus trichocarpa]
LRWT_f2p0_426_transcript94809_g3	hypothetical protein POPTR_0011s11140g [Populus trichocarpa]
LRWT_f2p0_1163_transcript59407_g10	hypothetical protein POPTR_0011s04780g [Populus trichocarpa]
LRWT_f4p0_394_transcript90887_g1	hypothetical protein POPTR_0010s24040g, partial [Populus trichocarpa]
LRWT_f3p0_469_transcript92449_g10	hypothetical protein POPTR_0010s24040g, partial [Populus trichocarpa]
LRWT_f5p0_1754_transcript36101_g1	hypothetical protein POPTR_0010s14920g [Populus trichocarpa]
LRWT_f6p0_1312_transcript50631_g1	hypothetical protein POPTR_0009s07990g [Populus trichocarpa]
LRWT_f3p0_671_transcript81502_g3	hypothetical protein POPTR_0007s05840g [Populus trichocarpa]
LRWT_f2p0_589_transcript85968_g11	hypothetical protein POPTR_0007s05840g [Populus trichocarpa]
LRWT_f3p0_534_transcript88851_g3	hypothetical protein POPTR_0007s03170g [Populus trichocarpa]
LRWT_f3p0_1464_transcript47386_g7	hypothetical protein POPTR_0005s06160g [Populus trichocarpa]
LRWT_f10p0_867_transcript67753_g1	hypothetical protein POPTR_0002s25530g [Populus trichocarpa]
LRWT_f3p0_927_transcript68878_g2	hypothetical protein POPTR_0002s25530g [Populus trichocarpa]
LRWT_f6p0_809_transcript73914_g6	hypothetical protein POPTR_0002s25530g [Populus trichocarpa]
LRWT_f2p0_873_transcript71368_g6	hypothetical protein POPTR_0002s25530g [Populus trichocarpa]
LRWT_f2p0_808_transcript74479_g9	hypothetical protein POPTR_0002s25530g [Populus trichocarpa]
LRWT_f2p0_897_transcript70261_g10	hypothetical protein POPTR_0002s25530g [Populus trichocarpa]
LRWT_f4p0_889_transcript67471_g1	hypothetical protein POPTR_0002s25530g [Populus trichocarpa]
LRWT_f2p0_859_transcript71989_g5	hypothetical protein POPTR_0002s25530g [Populus trichocarpa]
LRWT_f19p0_1541_transcript42679_g1	hypothetical protein POPTR_0001s32000g [Populus trichocarpa]
LRWT_f7p0_485_transcript91407_g1	hypothetical protein POPTR_0001s31380g [Populus trichocarpa]
LRWT_f2p0_1288_transcript54317_g11	hypothetical protein POPTR_0001s31040g [Populus trichocarpa]
LRWT_f6p0_1739_transcript35593_g1	hypothetical protein POPTR_0001s31040g [Populus trichocarpa]
LRWT_f2p0_591_transcript86896_g21	hypothetical protein POPTR_0001s09050g [Populus trichocarpa]
LRWT_f2p0_557_transcript87765_g27	hypothetical protein POPTR_0001s09050g [Populus trichocarpa]
LRWT_f3p0_1607_transcript41654_g1	hypothetical protein POPTR_0001s02280g [Populus trichocarpa]
LRWT_f6p0_1683_transcript38882_g2	hypothetical protein PHAVU_007G200800g [Phaseolus vulgaris]
LRWT_f18p0_1491_transcript45910_g3	hypothetical protein PHAVU_005G146000g [Phaseolus vulgaris]
LRWT_f9p0_1370_transcript50179_g1	hypothetical protein PHAVU_005G146000g [Phaseolus vulgaris]
LRWT_f2p0_548_transcript88093_g6	hypothetical protein MTR_3g111970 [Medicago truncatula]
LRWT_f4p0_831_transcript72982_g3	hypothetical protein MTR_2g026420 [Medicago truncatula]
LRWT_f3p0_846_transcript72944_g4	hypothetical protein MTR_2g026420 [Medicago truncatula]
LRWT_f3p0_583_transcript86235_g1	hypothetical protein MIMGU_mgv1a023921mg, partial [Erythranthe guttata]
LRWT_f2p0_390_transcript96939_g18	hypothetical protein MIMGU_mgv1a018650mg [Erythranthe guttata]
LRWT_f13p0_1628_transcript40509_g2	hypothetical protein LR48_Vigan09g021300 [Vigna angularis]
LRWT_f2p0_2340_transcript23279_g3	hypothetical protein LR48_Vigan09g021300 [Vigna angularis]
LRWT_f2p0_2723_transcript17020_g1	hypothetical protein L484_024142 [Morus notabilis]
LRWT_f2p0_795_transcript75095_g5	hypothetical protein L484_022798 [Morus notabilis]
LRWT_f7p0_1448_transcript47556_g2	hypothetical protein L484_022099 [Morus notabilis]
LRWT_f8p0_444_transcript90955_g1	hypothetical protein L484_018178 [Morus notabilis]
LRWT_f9p0_531_transcript87869_g2	hypothetical protein L484_003669 [Morus notabilis]
LRWT_f3p0_729_transcript78508_g7	hypothetical protein L484_001900 [Morus notabilis]
LRWT_f3p0_695_transcript80205_g1	hypothetical protein L484_001900 [Morus notabilis]
LRWT_f11p0_1806_transcript34860_g2	hypothetical protein L484_001201 [Morus notabilis]
LRWT_f3p0_2019_transcript29790_g4	hypothetical protein L484_001025 [Morus notabilis]
LRWT_f6p0_1279_transcript51921_g1	hypothetical protein JCGZ_25565 [Jatropha curcas]
LRWT_f2p0_483_transcript91755_g14	hypothetical protein JCGZ_16846 [Jatropha curcas]
LRWT_f14p0_893_transcript70053_g2	hypothetical protein JCGZ_05131 [Jatropha curcas]
LRWT_f4p0_1041_transcript63990_g7	hypothetical protein JCGZ_05131 [Jatropha curcas]
LRWT_f22p0_776_transcript75315_g1	hypothetical protein JCGZ_05131 [Jatropha curcas]
LRWT_f6p0_336_transcript98757_g4	hypothetical protein JCGZ_00710 [Jatropha curcas]
LRWT_f35p0_1871_transcript31246_g1	hypothetical protein GUITHDRAFT_43593, partial [Guillardia theta CCMP2712]
LRWT_f7p0_339_transcript99597_g2	hypothetical protein GLYMA_14G067700 [Glycine max]
LRWT_f2p0_1932_transcript31977_g7	hypothetical protein GLYMA_09G186300 [Glycine max]
LRWT_f3p0_1090_transcript61955_g6	hypothetical protein GLYMA_03G116700 [Glycine max]
LRWT_f2p0_749_transcript77449_g14	hypothetical protein FGSG_01443 [Fusarium graminearum PH-1]
LRWT_f2p0_253_transcript104693_g2	hypothetical protein EUGRSUZ_J02069 [Eucalyptus grandis]
LRWT_f4p0_739_transcript75276_g3	hypothetical protein EUGRSUZ_J01977 [Eucalyptus grandis]
LRWT_f2p0_2090_transcript28137_g5	hypothetical protein CISIN_1g043627mg [Citrus sinensis]
LRWT_f2p0_1582_transcript43145_g10	hypothetical protein CISIN_1g038199mg [Citrus sinensis]
LRWT_f2p0_479_transcript92525_g21	hypothetical protein CISIN_1g023970mg [Citrus sinensis]
LRWT_f6p0_1404_transcript48493_g2	hypothetical protein CISIN_1g017376mg [Citrus sinensis]
LRWT_f2p0_272_transcript103577_g13	hypothetical protein CISIN_1g015465mg [Citrus sinensis]
LRWT_f2p0_644_transcript82937_g3	hypothetical protein CISIN_1g0097281mg, partial [Citrus sinensis]
LRWT_f18p0_2355_transcript22348_g1	hypothetical protein CISIN_1g007800mg [Citrus sinensis]
LRWT_f2p0_2420_transcript21880_g2	hypothetical protein CISIN_1g0045622mg [Citrus sinensis]
LRWT_f10p0_1518_transcript44917_g1	hypothetical protein CICLE_v10033753mg, partial [Citrus clementina]
LRWT_f5p0_767_transcript75465_g3	hypothetical protein CICLE_v10033350mg [Citrus clementina]
LRWT_f5p0_1017_transcript64654_g1	hypothetical protein CICLE_v10032181mg [Citrus clementina]
LRWT_f5p0_348_transcript99238_g4	hypothetical protein CICLE_v10031316mg [Citrus clementina]
LRWT_f2p0_2127_transcript27217_g4	hypothetical protein CICLE_v10031055mg [Citrus clementina]
LRWT_f7p0_1137_transcript59909_g1	hypothetical protein CICLE_v10029834mg [Citrus clementina]
LRWT_f13p0_826_transcript72578_g1	hypothetical protein CICLE_v10029465mg [Citrus clementina]
LRWT_f35p0_1782_transcript33201_g1	hypothetical protein CICLE_v10028305mg [Citrus clementina]
LRWT_f19p0_1110_transcript60624_g1	hypothetical protein CICLE_v10026049mg [Citrus clementina]
LRWT_f2p0_1909_transcript32488_g1	hypothetical protein CICLE_v10025674mg [Citrus clementina]
LRWT_f2p0_1428_transcript46650_g1	hypothetical protein CICLE_v10024242mg [Citrus clementina]
LRWT_f2p0_497_transcript90287_g1	hypothetical protein CICLE_v10023101mg [Citrus clementina]
LRWT_f7p0_873_transcript71137_g2	hypothetical protein CICLE_v10022381mg [Citrus clementina]
LRWT_f3p0_2662_transcript18024_g3	hypothetical protein CICLE_v10019196mg [Citrus clementina]
LRWT_f2p0_1303_transcript53453_g5	hypothetical protein CICLE_v10016020mg [Citrus clementina]
LRWT_f3p0_1109_transcript60146_g1	hypothetical protein CICLE_v10016020mg [Citrus clementina]
LRWT_f6p0_1519_transcript45350_g3	hypothetical protein CICLE_v10013686mg [Citrus clementina]
LRWT_f8p0_1085_transcript61745_g1	hypothetical protein CICLE_v10012620mg [Citrus clementina]
LRWT_f5p0_1510_transcript45167_g1	hypothetical protein CICLE_v10010327mg [Citrus clementina]
LRWT_f3p0_1467_transcript47239_g2	hypothetical protein CICLE_v10010157mg [Citrus clementina]
LRWT_f3p0_639_transcript83393_g8	hypothetical protein CICLE_v10009756mg [Citrus clementina]
LRWT_f7p0_966_transcript66419_g3	hypothetical protein CICLE_v10009497mg [Citrus clementina]
LRWT_f4p0_1502_transcript45742_g2	hypothetical protein CICLE_v10004755mg [Citrus clementina]
LRWT_f2p0_537_transcript88671_g5	hypothetical protein CICLE_v10003908mg [Citrus clementina]
LRWT_f11p0_842_transcript72184_g1	hypothetical protein Ccrd_014817 [Cynara cardunculus var. scolymus]
LRWT_f6p0_560_transcript87174_g1	hypothetical protein Ccrd_008037 [Cynara cardunculus var. scolymus]
LRWT_f2p0_670_transcript81557_g5	hypothetical protein BVRB_3g055610 [Beta vulgaris subsp. vulgaris]
LRWT_f4p0_409_transcript95254_g6	hypothetical protein B456_011G198800 [Gossypium raimondii]
LRWT_f16p0_1911_transcript32248_g1	hypothetical protein B456_009G296100 [Gossypium raimondii]
LRWT_f3p0_2795_transcript15466_g1	hypothetical protein B456_009G175100 [Gossypium raimondii]
LRWT_f3p0_1781_transcript36093_g1	hypothetical protein B456_001G252200 [Gossypium raimondii]
LRWT_f3p0_1150_transcript59689_g6	hypothetical protein AMTR_s00077p00148760 [Amborella trichopoda]
LRWT_f159p0_1134_transcript59256_g1	hypothetical protein AMTR_s00077p00148760 [Amborella trichopoda]
LRWT_f3p0_1959_transcript31236_g5	hypothetical protein AMTR_s00049p00187420 [Amborella trichopoda]
LRWT_f9p0_558_transcript87465_g1	hypothetical protein AALP_AA8G499200 [Arabis alpina]
LRWT_f3p0_433_transcript94850_g8	hypothetical protein AALP_AA5G070800 [Arabis alpina]
LRWT_f32p0_979_transcript63756_g1	hypothetical protein AALP_AA4G109600 [Arabis alpina]
LRWT_f4p0_716_transcript78952_g5	hypothetical protein AALP_AA2G136200 [Arabis alpina]
LRWT_f3p0_1579_transcript43256_g3	hypothetical protein AALP_AA1G202700 [Arabis alpina]
LRWT_f13p0_1589_transcript41206_g1	hypothetical protein [Delphinium grandiflorum]
LRWT_f7p0_1877_transcript33400_g3	hypothetical protein [Delphinium grandiflorum]
LRWT_f29p0_605_transcript83395_g1	hypothetical protein [Coptis japonica]
LRWT_f2p0_660_transcript79971_g1	hypothetical protein [Coptis japonica]
LRWT_f4p0_517_transcript89626_g4	hypothetical protein [Coptis japonica]
LRWT_f3p0_468_transcript92500_g8	hypothetical protein [Coptis japonica]
LRWT_f3p0_717_transcript79223_g12	hypoia-responsive family protein 2 [Hevea brasiliensis]
LRWT_f2p0_1395_transcript49882_g6	Hyoscyamine 6-dioxygenase [Morus notabilis]
LRWT_f4p0_378_transcript97438_g5	HXXXD-type acyl-transferase family protein, putative [Theobroma cacao]
LRWT_f4p0_591_transcript83290_g1	histone H3, partial [Zea mays]
LRWT_f4p0_748_transcript76828_g3	Histone H2B.3 [Morus notabilis]
LRWT_f3p0_1856_transcript34077_g3	hexose transporter 1 [Juglans regia]
LRWT_f8p0_1099_transcript59765_g1	Heavy metal-associated domain, HMA [Cynara cardunculus var. scolymus]
LRWT_f2p0_740_transcript77989_g13	Heavy metal-associated domain, HMA [Cynara cardunculus var. scolymus]
LRWT_f2p0_2270_transcript24600_g5	heat shock protein 70 [Populus trichocarpa]
LRWT_f7p0_2366_transcript21694_g1	heat shock cognate 70 kDa protein [Medicago truncatula]
LRWT_f2p0_2299_transcript22970_g1	Heat shock 70 kDa protein, mitochondrial [Auxenochlorella protothecoides]
LRWT_f3p0_2111_transcript27670_g2	Heat shock 70 kDa protein 4 [Morus notabilis]
LRWT_f2p0_835_transcript73267_g19	Glycosyltransferase C20, putative [Theobroma cacao]
LRWT_f3p0_643_transcript83564_g6	glycolytic glyceraldehyde 3-phosphate dehydrogenase [Antirrhinum majus]
LRWT_f6p0_1498_transcript45932_g1	glyceraldehyde 3-phosphate dehydrogenase [Daucus carota]
LRWT_f2p0_1662_transcript39573_g3	Glutelin type-B 5 [Morus notabilis]
LRWT_f5p0_1500_transcript45115_g1	Glutelin type-B 5 [Morus notabilis]
LRWT_f4p0_618_transcript84196_g3	Glutathione S-transferase tau 7 [Theobroma cacao]
LRWT_f2p0_1498_transcript46155_g8	glutathione S-transferase [Camellia japonica]
LRWT_f5p0_1569_transcript43179_g2	glutamate--ammonia ligase [Brassica napus]
LRWT_f2p0_1517_transcript45436_g3	glutamate--ammonia ligase [Brassica napus]
LRWT_f2p0_2298_transcript23615_g1	Glucose-6-phosphate 1-dehydrogenase 2 isoform 1 [Theobroma cacao]
LRWT_f3p0_2213_transcript25615_g2	Glucose-6-phosphate 1-dehydrogenase 2 isoform 1 [Theobroma cacao]
LRWT_f5p0_1306_transcript52120_g1	geranylgeranyl diphosphate synthase [Adonis aestivalis var. palaestina]
LRWT_f2p0_443_transcript94003_g22	GDSL-like Lipase/Acylhydrolase superfamily protein [Theobroma cacao]
LRWT_f2p0_589_transcript85646_g2	GDSL esterase/lipase 7 [Morus notabilis]
LRWT_f189p0_1490_transcript44322_g1	GDP-mannose 3,5-epimerase 1 [Theobroma cacao]
LRWT_f11p0_2103_transcript27394_g1	GDP-L-galactose phosphorylase [Actinidia rufa]
LRWT_f9p0_1274_transcript53749_g1	fructokinase [Actinidia chinensis]
LRWT_f52p0_1804_transcript32807_g1	flavonol 3'-hydroxylase [Delphinium semibarbatum]
LRWT_f11p0_1432_transcript47823_g1	FAD/NAD(P)-binding oxidoreductase family protein [Arabidopsis thaliana]
LRWT_f32p0_911_transcript67733_g1	expansin A1 [Medicago truncatula]
LRWT_f6p0_946_transcript67815_g1	expansin A1 [Medicago truncatula]
LRWT_f3p0_838_transcript72966_g2	ethylene-responsive transcription factor 1A [Paeonia lactiflora]
LRWT_f19p0_2230_transcript22983_g1	ethylene receptor [Delphinium 'MagicFountains dark blue']
LRWT_f2p0_1106_transcript61289_g9	ENTH/VHS family protein [Theobroma cacao]
LRWT_f4p0_2921_transcript13288_g1	Endoplasmin-like protein [Morus notabilis]
LRWT_f3p0_710_transcript79599_g6	elicitor-inducible protein EIG-J7 [Capsicum annuum]
LRWT_f2p0_472_transcript93820_g16	DNA-damage-repair/toleration protein DRT100 [Glycine soja]
LRWT_f2p0_2547_transcript20968_g11	deoxyxylulose-5-phosphate synthase [Adonis aestivalis var. palaestina]
LRWT_f5p0_2432_transcript21664_g4	deoxyxylulose-5-phosphate synthase [Adonis aestivalis var. palaestina]
LRWT_f13p0_2438_transcript21356_g2	deoxyxylulose-5-phosphate synthase [Adonis aestivalis var. palaestina]
LRWT_f2p0_558_transcript87589_g15	cytosolic glutamine synthetase alpha [Glycine max]
LRWT_f3p0_1960_transcript31575_g5	Cytochrome P450 71A1 [Theobroma cacao]
LRWT_f16p0_2021_transcript28993_g1	Cytochrome P450 71A1 [Theobroma cacao]
LRWT_f2p0_1897_transcript32873_g6	Cytochrome P450 71A1 [Theobroma cacao]
LRWT_f321p0_1691_transcript35698_g1	Cytochrome P450 71A1 [Theobroma cacao]
LRWT_f2p0_1774_transcript36801_g10	cytochrome P450 704C1-like protein [Camellia sinensis]
LRWT_f11p0_1629_transcript40747_g2	Cytochrome P450 [Theobroma cacao]
LRWT_f3p0_1755_transcript37306_g5	Cytochrome P450 [Theobroma cacao]
LRWT_f9p0_1763_transcript36248_g1	cytochrome P450 [Sinopodophyllum hexandrum]
LRWT_f3p0_1838_transcript34521_g1	cytochrome P450 [Sinopodophyllum hexandrum]
LRWT_f2p0_1750_transcript37284_g2	cytochrome P450 [Sinopodophyllum hexandrum]
LRWT_f5p0_1583_transcript42025_g1	cytochrome P450 [Sinopodophyllum hexandrum]
LRWT_f3p0_1790_transcript35843_g1	cytochrome P450 [Sinopodophyllum hexandrum]
LRWT_f17p0_1784_transcript33970_g1	cytochrome P450 [Sinopodophyllum hexandrum]
LRWT_f3p0_1650_transcript40833_g5	cytochrome P450 [Cynara cardunculus var. scolymus]
LRWT_f13p0_1956_transcript28972_g1	cytochrome P450 [Coptis japonica var. dissecta]
LRWT_f2p0_846_transcript70519_g1	cytochrome P450 [Coptis japonica var. dissecta]
LRWT_f2p0_1725_transcript38231_g8	cytochrome P450 [Coptis japonica var. dissecta]
LRWT_f3p0_1726_transcript38637_g10	cytochrome P450 [Coptis japonica var. dissecta]
LRWT_f5p0_1670_transcript39967_g6	cytochrome P450 [Coptis japonica var. dissecta]
LRWT_f3p0_1747_transcript37488_g4	cytochrome P450 [Coptis japonica var. dissecta]
LRWT_f3p0_1738_transcript37712_g2	cytochrome P450 [Coptis japonica var. dissecta]
LRWT_f6p0_1744_transcript37460_g3	cytochrome P450 [Coptis japonica var. dissecta]
LRWT_f2p0_1896_transcript32896_g4	cytochrome P450 [Coptis japonica var. dissecta]
LRWT_f2p0_1713_transcript38590_g4	cytochrome P450 [Coptis japonica var. dissecta]
LRWT_f2p0_1763_transcript36542_g2	cytochrome P450 [Coptis japonica var. dissecta]
LRWT_f2p0_1682_transcript39709_g16	cytochrome P450 [Coptis japonica var. dissecta]
LRWT_f3p0_1907_transcript32465_g5	cytochrome P450 [Coptis japonica var. dissecta]
LRWT_f3p0_1907_transcript32602_g8	cytochrome P450 [Coptis japonica var. dissecta]
LRWT_f2p0_1895_transcript32914_g6	cytochrome P450 [Coptis japonica var. dissecta]
LRWT_f2p0_2016_transcript29794_g7	cytochrome P450 [Coptis japonica var. dissecta]
LRWT_f6p0_1908_transcript32498_g4	cytochrome P450 [Coptis japonica var. dissecta]
LRWT_f8p0_1818_transcript34400_g2	cytochrome P450 [Coptis japonica var. dissecta]
LRWT_f19p0_1788_transcript34167_g1	cytochrome P450 [Coptis japonica var. dissecta]
LRWT_f12p0_1813_transcript34846_g2	cytochrome P450 [Coptis japonica var. dissecta]
LRWT_f5p0_2023_transcript29569_g2	cytochrome P450 [Coptis japonica var. dissecta]
LRWT_f2p0_1964_transcript31101_g5	cytochrome P450 [Coptis japonica var. dissecta]
LRWT_f7p0_795_transcript73923_g1	cytochrome b5 isoform Cb5-B [Vernicia fordii]
LRWT_f25p0_641_transcript79407_g1	cytochrome b5 [Nicotiana tabacum]
LRWT_f57p0_493_transcript90574_g1	cysteine-rich TM module stress tolerance protein [Medicago truncatula]
LRWT_f7p0_1454_transcript46915_g2	Cysteine synthase, chloroplastic/chromoplastic [Gossypium arboreum]
LRWT_f36p0_2684_transcript14760_g1	Cyclic nucleotide-gated ion channel 1 [Morus notabilis]
LRWT_f4p0_689_transcript80500_g5	Cupredoxin [Cynara cardunculus var. scolymus]
LRWT_f5p0_467_transcript92076_g3	conserved hypothetical protein [Ricinus communis]
LRWT_f5p0_417_transcript94007_g4	conserved hypothetical protein [Ricinus communis]
LRWT_f5p0_1312_transcript53114_g2	conserved hypothetical protein [Ricinus communis]
LRWT_f3p0_545_transcript88311_g3	conserved hypothetical protein [Ricinus communis]
LRWT_f2p0_1448_transcript47949_g12	coclaurine N-methyltransferase [Coptis japonica]
LRWT_f2p0_671_transcript82035_g19	class III peroxidase [Populus trichocarpa]
LRWT_f3p0_4228_transcript3375_g1	CjMDR1 [Coptis japonica]
LRWT_f5p0_1608_transcript41557_g2	Chromodomain-helicase-DNA-binding protein Mi-2-like protein [Morus notabilis]
LRWT_f3p0_765_transcript76628_g5	chloroplast carbonic anhydrase [Pachysandra terminalis]
LRWT_f27p0_988_transcript65031_g2	chloroplast carbonic anhydrase [Pachysandra terminalis]
LRWT_f10p0_951_transcript66994_g1	chitinase precursor [Petroselinum crispum]
LRWT_f6p0_1209_transcript56707_g2	chitinase [Triticum aestivum]
LRWT_f2p0_733_transcript78244_g8	Chaperonin 10 isoform 1 [Theobroma cacao]
LRWT_f109p0_920_transcript66745_g1	chalcone isomerase [Punica granatum]
LRWT_f2p0_739_transcript78177_g15	Chain A, Native Crystal Structure Analysis On Arabidopsis Dutpase
LRWT_f2p0_1242_transcript55975_g13	catechol O-methyltransferase [Thalictrum tuberosum]
LRWT_f3p0_1264_transcript54996_g4	catalytic, putative [Ricinus communis]
LRWT_f3p0_1646_transcript40715_g2	Calreticulin [Glycine soja]
LRWT_f9p0_1159_transcript59078_g4	Calcineurin B-like protein 7 [Morus notabilis]
LRWT_f2p0_1418_transcript49041_g4	Caffeic Acid5-Hydroxyferulic Acid 35-O-Methyltransferase [Populus tomentosa]
LRWT_f2p0_491_transcript91226_g10	caffeic acid O-3-methyltransferase [Populus deltoides]
LRWT_f19p0_1180_transcript57460_g1	Caffeic acid 3-O-methyltransferase [Morus notabilis]
LRWT_f148p0_838_transcript71604_g1	C2 domain-containing family protein [Populus trichocarpa]
LRWT_f60p0_4064_transcript3278_g1	B-type ABC transporter [Thalictrum minus]
LRWT_f12p0_1144_transcript59510_g1	broad substrate reductase/dehydrogenase [Artemisia annua]
LRWT_f7p0_1171_transcript57027_g1	broad substrate reductase/dehydrogenase [Artemisia annua]
LRWT_f2p0_2409_transcript22126_g8	BnaCnng12640D [Brassica napus]
LRWT_f2p0_1019_transcript64903_g6	bHLH transcription factor, partial [Glycine max]
LRWT_f2p0_1967_transcript30896_g4	beta-glucosidase [Consolida orientalis]
LRWT_f16p0_1779_transcript33841_g1	beta-glucosidase [Consolida orientalis]
LRWT_f6p0_1307_transcript50644_g1	beta-carotene hydroxylase 1 [Adonis aestivalis var. palaestina]
LRWT_f16p0_1417_transcript45479_g2	Benzyl alcohol O-benzoyltransferase [Gossypium arboreum]
LRWT_f7p0_1543_transcript44246_g3	Benzoyl coenzyme A: Benzyl alcohol benzoyl transferase [Theobroma cacao]
LRWT_f5p0_894_transcript69878_g1	Basic helix-loop-helix DNA-binding superfamily protein, putative [Theobroma cacao]
LRWT_f11p0_1478_transcript46044_g1	BAHD-type acyltransferase [Actaea racemosa]
LRWT_f4p0_1638_transcript41147_g3	BAHD-type acyltransferase [Actaea racemosa]
LRWT_f10p0_1481_transcript45469_g1	BAHD-type acyltransferase [Actaea racemosa]
LRWT_f17p0_1546_transcript42560_g1	BAHD-type acyltransferase [Actaea racemosa]
LRWT_f2p0_1590_transcript42783_g3	BAHD-type acyltransferase [Actaea racemosa]
LRWT_f25p0_1372_transcript49129_g1	BAHD-type acyltransferase [Actaea racemosa]
LRWT_f16p0_1388_transcript47478_g1	BAHD-type acyltransferase [Actaea racemosa]
LRWT_f2p0_1613_transcript42093_g13	BAHD-type acyltransferase [Actaea racemosa]
LRWT_f4p0_1371_transcript50810_g5	BAHD-type acyltransferase [Actaea racemosa]
LRWT_f13p0_1402_transcript48353_g2	BAHD-type acyltransferase [Actaea racemosa]
LRWT_f3p0_1950_transcript31442_g3	BAHD-type acyltransferase [Actaea racemosa]
LRWT_f3p0_1483_transcript44242_g1	BAHD-type acyltransferase [Actaea racemosa]
LRWT_f11p0_1523_transcript42367_g1	BAHD-type acyltransferase [Actaea racemosa]
LRWT_f30p0_1482_transcript46297_g1	BAHD-type acyltransferase [Actaea racemosa]
LRWT_f8p0_1443_transcript45937_g1	BAHD-type acyltransferase [Actaea racemosa]
LRWT_f3p0_1515_transcript45666_g7	BAHD-type acyltransferase [Actaea racemosa]
LRWT_f3p0_1948_transcript31035_g1	BAHD-type acyltransferase [Actaea racemosa]
LRWT_f11p0_1409_transcript48912_g1	BAHD-type acyltransferase [Actaea racemosa]
LRWT_f8p0_1494_transcript45211_g2	BAHD-type acyltransferase [Actaea racemosa]
LRWT_f2p0_1633_transcript42165_g15	BAHD-type acyltransferase [Actaea racemosa]
LRWT_f8p0_1510_transcript44643_g1	BAHD-type acyltransferase [Actaea racemosa]
LRWT_f20p0_1050_transcript62634_g1	ascorbate peroxidase [Picrorhiza kurrooa]
LRWT_f37p0_991_transcript65310_g1	ascorbate peroxidase [Picrorhiza kurrooa]
LRWT_f4p0_1180_transcript56467_g1	Armadillo [Cynara cardunculus var. scolymus]
LRWT_f2p0_1761_transcript36993_g8	ARID/BRIGHT DNA-binding domain,ELM2 domain protein, putative [Theobroma cacao]
LRWT_f12p0_978_transcript66061_g1	Aquaporin-like protein [Cynara cardunculus var. scolymus]
LRWT_f7p0_975_transcript65879_g5	apical meristem (NAM) family protein [Populus tomentosa]
LRWT_f2p0_606_transcript85006_g8	Anthocyanin 3'-O-beta-glucosyltransferase [Theobroma cacao]
LRWT_f23p0_1200_transcript56135_g1	annexin [Manihot esculenta]
LRWT_f2p0_1278_transcript53560_g2	annexin [Manihot esculenta]
LRWT_f4p0_1949_transcript30802_g1	AMP-dependent synthetase and ligase family protein [Theobroma cacao]
LRWT_f4p0_1329_transcript52261_g3	Alpha/beta-Hydrolases superfamily protein isoform 1 [Theobroma cacao]
LRWT_f2p0_1640_transcript41083_g6	alliinase family protein [Populus trichocarpa]
LRWT_f2p0_1196_transcript57515_g1	allergenic isoflavone reductase-like protein Bet v 6.0102 [Betula pendula]
LRWT_f155p0_1113_transcript58018_g1	allergenic isoflavone reductase-like protein Bet v 6.0102 [Betula pendula]
LRWT_f4p0_1416_transcript48200_g2	Aldolase superfamily protein [Theobroma cacao]
LRWT_f4p0_1662_transcript39891_g3	Aldolase superfamily protein [Theobroma cacao]
LRWT_f4p0_2107_transcript27682_g3	Alanine aminotransferase 2 [Theobroma cacao]
LRWT_f5p0_1320_transcript52439_g3	Acidic endochitinase [Morus notabilis]
LRWT_f2p0_1187_transcript58178_g7	Acidic endochitinase [Morus notabilis]
LRWT_f256p0_1214_transcript53056_g1	ACC oxidase 5 [Actinidia deliciosa]
LRWT_f43p0_4257_transcript2819_g1	ABC protein [Coptis japonica]
LRWT_f2p0_1838_transcript34707_g17	6-phosphogluconate dehydrogenase, C-terminal [Cynara cardunculus var. scolymus]
LRWT_f3p0_1943_transcript31619_g7	4-coumarate:CoA ligase 3 [Epimedium sagittatum]
LRWT_f6p0_1226_transcript56505_g7	3'-hydroxy-N-methyl-(S)-coclaurine 4'-O-methyltransferase [Podophyllum peltatum]
LRWT_f22p0_2091_transcript27035_g1	3-hydroxy-3-methylglutaryl coenzyme A reductase [Camellia sinensis]
LRWT_f6p0_1182_transcript57346_g1	2-oxoglutarate (2OG) and Fe(II)-dependent oxygenase superfamily protein, putative isoform 1 [Theobroma cacao]
LRWT_f4p0_2059_transcript27421_g2	1-deoxy-d-xylulose 5-phosphate reductoisomerase [Camellia sinensis]
LRWT_f2p0_764_transcript76226_g3	1-aminocyclopropane-1-carboxylate oxidase [Gossypium arboreum]
LRWT_f3p0_603_transcript85180_g5	17.9 kDa class II heat shock protein [Glycine soja]
LRWT_f3p0_672_transcript81466_g5	17.3 kDa class I heat shock protein [Glycine max]
LRWT_f2p0_850_transcript72622_g18	17.3 kDa class I heat shock protein [Arachis hypogaea]
LRWT_f3p0_1323_transcript52634_g6	12-oxophytodienoate reductase 2 [Theobroma cacao]
LRWT_f3p0_661_transcript82124_g8	.^.
LRWT_f3p0_542_transcript88548_g6	.
LRWT_f2p0_469_transcript92446_g11	.
LRWT_f2p0_192_transcript108239_g10	.
LRWT_f2p0_702_transcript80797_g18	.
LRWT_f8p0_708_transcript79127_g3	.
LRWT_f3p0_511_transcript90684_g10	.
LRWT_f3p0_208_transcript107921_g13	.
LRWT_f3p0_307_transcript101875_g3	.
LRWT_f2p0_479_transcript91884_g3	.
LRWT_f2p0_310_transcript101394_g9	.
LRWT_f3p0_647_transcript82768_g3	.
LRWT_f6p0_416_transcript95259_g2	.
LRWT_f3p0_614_transcript83141_g1	.
LRWT_f4p0_1030_transcript64019_g3	.
LRWT_f10p0_783_transcript73906_g1	.
LRWT_f2p0_924_transcript69049_g17	.
LRWT_f3p0_795_transcript75091_g1	.
LRWT_f3p0_611_transcript84738_g2	.
LRWT_f18p0_436_transcript92909_g1	.
LRWT_f2p0_655_transcript82386_g19	.
LRWT_f3p0_533_transcript89285_g7	.
LRWT_f5p0_847_transcript70859_g1	.
LRWT_f2p0_221_transcript106537_g1	.
LRWT_f54p0_378_transcript95995_g1	.
LRWT_f3p0_308_transcript101555_g3	.
LRWT_f19p0_392_transcript95934_g1	.
LRWT_f14p0_308_transcript101337_g1	.
LRWT_f2p0_850_transcript72400_g7	.
LRWT_f4p0_553_transcript87831_g4	.
LRWT_f14p0_749_transcript75835_g2	.
LRWT_f2p0_393_transcript97098_g13	.
LRWT_f104p0_747_transcript76815_g1	.
LRWT_f3p0_481_transcript92437_g4	.
LRWT_f3p0_771_transcript75681_g1	.
LRWT_f3p0_351_transcript99125_g6	.
LRWT_f2p0_410_transcript95739_g14	.
LRWT_f4p0_358_transcript98604_g7	.
LRWT_f2p0_830_transcript73414_g8	.
LRWT_f7p0_864_transcript71412_g2	.
LRWT_f11p0_816_transcript73056_g1	.
LRWT_f2p0_479_transcript92393_g20	.
LRWT_f2p0_478_transcript91620_g2	.
LRWT_f56p0_510_transcript87985_g1	.
LRWT_f2p0_384_transcript97165_g5	.
LRWT_f2p0_937_transcript68391_g4	.
LRWT_f3p0_767_transcript77074_g10	.
LRWT_f3p0_534_transcript88849_g2	.
LRWT_f3p0_676_transcript82793_g8	.
LRWT_f2p0_315_transcript101228_g18	.
LRWT_f4p0_275_transcript102977_g3	.
LRWT_f3p0_725_transcript78628_g6	.
LRWT_f7p0_629_transcript82599_g1	.
LRWT_f2p0_327_transcript100392_g5	.
LRWT_f35p0_408_transcript93703_g1	.
LRWT_f4p0_247_transcript100961_g1	.
LRWT_f3p0_424_transcript95702_g8	.
LRWT_f5p0_877_transcript70692_g2	.
LRWT_f9p0_904_transcript68505_g1	.
LRWT_f20p0_699_transcript77906_g1	.
LRWT_f4p0_1305_transcript53354_g5	.
LRWT_f3p0_831_transcript73464_g11	.
LRWT_f3p0_685_transcript80422_g3	.
LRWT_f3p0_651_transcript83135_g8	.
LRWT_f3p0_1208_transcript57307_g2	.
LRWT_f2p0_538_transcript88901_g15	.
LRWT_f2p0_212_transcript104619_g1	.
LRWT_f3p0_629_transcript83748_g3	.
LRWT_f2p0_502_transcript90562_g8	.
LRWT_f4p0_770_transcript76177_g6	.
LRWT_f5p0_548_transcript87891_g3	.
LRWT_f2p0_353_transcript98996_g15	.
LRWT_f10p0_581_transcript85234_g1	.
LRWT_f3p0_908_transcript70196_g8	.
LRWT_f2p0_651_transcript82476_g5	.
LRWT_f4p0_580_transcript85577_g3	.
LRWT_f2p0_954_transcript67116_g1	.
LRWT_f4p0_812_transcript73982_g4	.
LRWT_f3p0_3136_transcript11912_g2	.
LRWT_f4p0_2745_transcript16659_g2	.
LRWT_f2p0_1275_transcript54487_g4	.
LRWT_f7p0_398_transcript91970_g1	.
LRWT_f2p0_2558_transcript19706_g6	.
LRWT_f6p0_757_transcript74770_g1	.
LRWT_f5p0_262_transcript103929_g6	.
LRWT_f25p0_475_transcript88181_g1	.
LRWT_f20p0_932_transcript65754_g1	.
LRWT_f4p0_706_transcript79612_g3	.
LRWT_f3p0_802_transcript76218_g8	.
LRWT_f2p0_766_transcript76551_g4	.
LRWT_f12p0_387_transcript96743_g3	.
LRWT_f2p0_362_transcript98463_g8	.
LRWT_f4p0_1371_transcript49907_g2	.
LRWT_f4p0_980_transcript65952_g5	.
LRWT_f3p0_430_transcript94695_g8	.
LRWT_f3p0_931_transcript68668_g1	.
LRWT_f2p0_751_transcript77460_g13	.
LRWT_f9p0_414_transcript93826_g1	.
LRWT_f2p0_716_transcript79134_g11	.
LRWT_f4p0_984_transcript64354_g1	.
LRWT_f7p0_639_transcript81862_g1	.
LRWT_f4p0_725_transcript78555_g5	.
LRWT_f2p0_868_transcript71653_g8	.
LRWT_f7p0_182_transcript106635_g1	.
LRWT_f2p0_1747_transcript38696_g14	.
LRWT_f2p0_288_transcript102617_g7	.
LRWT_f2p0_290_transcript103332_g19	.
LRWT_f2p0_1650_transcript40334_g3	.
LRWT_f2p0_1797_transcript35911_g11	.
LRWT_f2p0_389_transcript96861_g3	.
LRWT_f3p0_1726_transcript38125_g6	.
LRWT_f2p0_1049_transcript63652_g3	.
LRWT_f3p0_444_transcript93871_g5	.
LRWT_f3p0_459_transcript92986_g5	.
LRWT_f3p0_351_transcript99024_g1	.
LRWT_f3p0_639_transcript82217_g1	.
LRWT_f4p0_447_transcript93025_g6	.
LRWT_f2p0_693_transcript80367_g9	.
LRWT_f4p0_420_transcript94255_g6	.
LRWT_f2p0_1151_transcript59567_g5	.
LRWT_f8p0_1602_transcript40645_g1	.
LRWT_f3p0_1171_transcript58671_g2	.
LRWT_f3p0_395_transcript96596_g2	.
LRWT_f6p0_488_transcript89493_g1	.
LRWT_f7p0_514_transcript87857_g3	.
LRWT_f24p0_491_transcript90870_g1	.
LRWT_f5p0_2633_transcript17771_g1	.
LRWT_f3p0_215_transcript106937_g5	.
LRWT_f4p0_718_transcript78877_g1	.
LRWT_f10p0_371_transcript95965_g3	.
LRWT_f4p0_442_transcript93154_g2	.
LRWT_f3p0_769_transcript76500_g6	.
LRWT_f3p0_1644_transcript41015_g2	.
LRWT_f8p0_528_transcript85455_g2	.
LRWT_f2p0_334_transcript99999_g1	.
LRWT_f3p0_1391_transcript50236_g5	.
LRWT_f5p0_1859_transcript33502_g1	.
LRWT_f2p0_1108_transcript61781_g17	.
LRWT_f4p0_2019_transcript29564_g3	.
LRWT_f9p0_424_transcript94691_g2	.
LRWT_f35p0_1866_transcript32589_g1	.
LRWT_f9p0_1266_transcript54416_g1	.
LRWT_f20p0_751_transcript75783_g1	.
LRWT_f5p0_612_transcript84642_g3	.
LRWT_f6p0_564_transcript87116_g1	.
LRWT_f3p0_360_transcript98558_g2	.
LRWT_f14p0_868_transcript68641_g1	.
LRWT_f3p0_324_transcript100557_g2	.
LRWT_f8p0_361_transcript94468_g1	.
LRWT_f2p0_197_transcript107903_g2	.
LRWT_f2p0_623_transcript84889_g16	.
LRWT_f2p0_475_transcript92077_g5	.
LRWT_f2p0_786_transcript75577_g3	.
LRWT_f4p0_772_transcript76274_g2	.
LRWT_f2p0_1433_transcript47548_g1	.
LRWT_f8p0_434_transcript93268_g1	.
LRWT_f13p0_616_transcript83863_g1	.
LRWT_f39p0_712_transcript73945_g1	.
LRWT_f2p0_1809_transcript35444_g9	.
LRWT_f11p0_1235_transcript54243_g1	.
LRWT_f7p0_638_transcript82201_g1	.
LRWT_f2p0_587_transcript86095_g13	.
LRWT_f3p0_1562_transcript43786_g3	.
LRWT_f3p0_711_transcript79373_g4	.
LRWT_f66p0_485_transcript86138_g1	.
LRWT_f3p0_613_transcript84655_g4	.
LRWT_f43p0_1285_transcript52944_g1	.
LRWT_f8p0_598_transcript83362_g2	.
