# Supplementary material for: Integrating Metabolomics and Transcriptomics to Unveil Atisine Biosynthesis in Aconitum gymnandrum Maxim
Source: Int J Mol Sci. 2022 Nov 3;23(21):13463. doi: 10.3390/ijms232113463 (PMC9655601; doi:10.3390/ijms232113463)
Supplement: Supplementary file 1 [file ijms-23-13463-s001.zip › Supplementary Table S4.xlsx]

## Sheet: Supplementary Table 3. eigengen
Supplementary Table S4. eigengenes in 6 modules in A. gymnodendrum
ID	module	MJ-0h-1	MJ-0h-2	MJ-0h-3	MJ-6h-1	MJ-6h-2	MJ-6h-3	MJ-12h-1	MJ-12h-2	MJ-12h-3	MJ-24h-1	MJ-24h-2	MJ-24h-3	MJ-48h-1	MJ-48h-2	MJ-48h-3
LRWT_f8p0_816_transcript72854_g1	green	384.32	344.83	134.26	779.96	1559.96	816.66	1799.37	926.5	1240.94	2513.62	1772.31	2425.83	1515.72	1348.43	1348.43
LRWT_f5p0_1482_transcript46263_g2	green	1564.03	1819.43	1602.77	2115.11	2164.5	2643.51	2156.14	2146.96	1888.38	2378.89	2498.76	2452.2	1537.75	1643.11	1643.11
LRWT_f5p0_807_transcript74522_g2	green	300.03	463.99	414.83	577.3	760.91	1536.79	706.74	952.31	979.19	1399.52	1536.82	1575.05	1210.9	766.72	766.72
LRWT_f172p0_714_transcript75235_g1	green	249.71	281.35	205.55	773.51	497.94	636.32	541.21	205.28	656.71	585.12	151.1	696.93	457.91	228.72	228.72
LRWT_f4p0_822_transcript73932_g4	green	252.26	139.22	538.94	419.64	285.49	565.36	309.66	627	1166.27	185.66	763.99	647.99	408.79	220.65	220.65
LRWT_f3p0_915_transcript69387_g3	green	383.32	238.5	404.06	1047.21	1205.68	931.4	566.56	729.97	475.17	1581.91	1351.61	2000.68	472.21	556.11	556.11
LRWT_f8p0_1976_transcript30079_g1	green	264.02	145.84	64.67	374.74	474.23	427.36	587.76	689.72	1243.04	563.49	1094.05	305.32	202.32	376.97	376.97
LRWT_f4p0_1320_transcript49792_g1	green	597.71	573.36	434.69	547.01	510.8	647.41	850.57	747.52	762.68	1218.35	961.95	1152.69	775.07	931.06	931.06
LRWT_f6p0_1744_transcript36963_g1	green	251.78	135.21	395.35	359.53	384.58	121.74	1089.24	513.07	832.98	418.91	193.03	411.98	40.74	33.15	33.15
LRWT_f3p0_2741_transcript16799_g1	green	376.34	239.9	326.87	313.95	629.66	468	285.36	486.01	102.75	454.61	645.32	308.6	175.24	131.07	131.07
LRWT_f5p0_1281_transcript53870_g2	green	337.07	135.33	307.95	358.49	485.28	566.2	1182.16	892.48	851.33	495.42	617.91	777.06	594.64	468.45	468.45
LRWT_f23p0_1320_transcript51929_g1	green	200.41	275.48	265.14	237.53	227.98	217.82	455.08	387.67	568.25	561.03	570.24	471.04	354.98	381.28	381.28
LRWT_f12p0_1682_transcript36165_g1	green	256.63	250.02	273.49	272.59	402.12	382.29	547.72	445.08	611.4	631.17	556.95	648.79	331.42	467.18	467.18
LRWT_f14p0_1847_transcript34187_g1	green	350.98	368.04	339.91	572.66	553.4	599.27	582.75	454.97	621.33	666.17	622.5	715.21	311.02	390.29	390.29
LRWT_f16p0_743_transcript76228_g1	green	421.49	249.59	356.05	146.11	177.25	314.66	427.77	548.22	481.34	303.2	472.05	499.46	268.94	376.13	376.13
LRWT_f6p0_2203_transcript24625_g1	green	115.26	33.16	158.44	45.44	170.71	259.29	329.56	223.24	263.71	176.34	179.75	218.03	71.49	54.97	54.97
LRWT_f3p0_1552_transcript44065_g1	green	60.96	93.93	43.99	269.99	382.75	469.84	447	248.22	435.51	675.99	382.61	487.57	439.39	349.65	349.65
LRWT_f4p0_1662_transcript39891_g3	green	536.62	544.61	524.04	631.08	696.97	660.7	743.97	615.92	639.04	679.12	708.31	735.72	541.51	469.81	469.81
LRWT_f5p0_2687_transcript17606_g2	green	167.25	117.01	189.96	221.67	400.19	253.51	158.78	291.35	50.87	274.66	484.07	149.62	110.88	70.35	70.35
LRWT_f94p0_1604_transcript40191_g1	green	779.86	783.05	760.75	772.47	891.54	1114.8	872.35	747.76	876.44	1135.9	989.15	868.96	590.18	732.3	732.3
LRWT_f7p0_1441_transcript45489_g1	green	507.31	554.26	437.98	304.25	379.77	437.95	591.96	642.14	586.53	585.69	404.32	634.19	446.8	548.35	548.35
LRWT_f5p0_1787_transcript32811_g1	green	199.4	185.68	209.95	283.81	342.81	335.2	238.46	240.48	323.09	374.81	352.58	340.9	169.78	158.11	158.11
LRWT_f8p0_1375_transcript49184_g1	green	190.83	112.52	154.97	348.38	471.82	467.53	207.32	236.67	408.88	566.36	286.41	344.37	234.86	184.73	184.73
LRWT_f3p0_1918_transcript32325_g1	green	258.34	277.07	191.97	252.83	478.94	298.73	432.34	438.46	451.31	342.94	389.89	571.28	324.89	338.43	338.43
LRWT_f6p0_984_transcript66258_g4	green	37.2	232.2	144.73	120.17	212.23	263.92	1.86	384.74	251.26	162.03	535.4	309.23	144.38	86.06	86.06
LRWT_f64p0_2856_transcript13746_g1	green	192.31	109.09	98.18	112.77	162.28	269.58	582.28	364.81	395.73	231.66	221.57	358.63	294.31	204.01	204.01
LRWT_f2p0_1428_transcript46650_g1	green	88.72	18.79	44.89	89.08	191.43	291.88	571.61	535.41	730.65	144.66	204.83	287.61	114.41	161.21	161.21
LRWT_f3p0_1960_transcript31575_g5	green	72.72	47.14	44.89	47.42	189.78	126.49	151.5	467.27	241.85	251.99	41.76	215.57	0.15	118.94	118.94
LRWT_f2p0_1395_transcript49882_g6	green	20.59	4.31	15.19	53.88	166.35	190.98	339.15	195.05	351.73	59.51	160	343.49	49.56	75.7	75.7
LRWT_f43p0_988_transcript64880_g1	green	294.77	359.22	418	142.91	224.47	172.03	319.95	322.88	597.69	280.09	206.99	326.91	306.5	82.05	82.05
LRWT_f5p0_1821_transcript35067_g2	green	339.36	374.38	474.76	284.96	398.52	389.23	445.86	477.16	516.54	682.55	709.62	758.81	243.75	459.41	459.41
LRWT_f4p0_1339_transcript49591_g1	green	158.05	145.46	203.82	237.51	306.5	233.04	295.73	304.47	476.31	323.58	168.24	199.02	143.74	240.53	240.53
LRWT_f3p0_1896_transcript32979_g4	green	415.37	414.91	396.23	512.53	402.33	561.07	370.47	393.56	345.76	594.69	646.84	619.26	412.16	341.74	341.74
LRWT_f6p0_1912_transcript32045_g2	green	427.85	160.65	407.61	381.25	377.6	320.05	348.39	433.14	428.91	425.24	330.12	359.63	240.58	286.05	286.05
LRWT_f3p0_699_transcript80082_g3	green	18.83	38.33	38.83	145.98	93.23	60.39	171.97	37.64	138.79	179.69	197.7	126.46	45.12	106.93	106.93
LRWT_f8p0_1840_transcript33658_g2	green	267.62	246.54	241.97	99.99	220.94	223.67	307.81	267.08	307.73	382.59	294.83	357.64	140.56	170.48	170.48
LRWT_f3p0_635_transcript83412_g3	green	64.11	69.64	123.81	63.91	141.05	240.25	550.23	156.8	207.31	39.25	272.47	151.36	90.78	48.16	48.16
LRWT_f9p0_1274_transcript53749_g1	green	318.65	247.88	257.19	567.78	365.9	482.31	404.86	543.56	535.91	569.97	512.46	630.27	372.94	513.39	513.39
LRWT_f2p0_1524_transcript45312_g15	green	260.06	317.19	361.4	225.66	361.26	361.26	877.36	590.24	590.66	391.43	528.11	658.86	405.87	373.53	373.53
LRWT_f5p0_1253_transcript53045_g1	green	156.31	221.72	181.48	233.66	252.5	323.71	244.32	264.71	359.46	385.77	471.09	334.95	257.88	320.14	320.14
LRWT_f5p0_1526_transcript44342_g1	green	145.06	179.88	182.93	252.65	173.25	213.04	295.67	154.47	184	313.74	268.39	254.51	127.86	101.47	101.47
LRWT_f8p0_937_transcript67582_g2	green	260.99	306.49	294.06	433.28	408.96	379.24	392.37	302.93	337.32	553.71	413.6	418.98	277.72	318.88	318.88
LRWT_f7p0_2870_transcript14850_g1	green	29.41	22.49	72.56	11.25	71.67	56.11	180.78	1.29	179.8	132.58	171.77	105.55	101.82	17.36	17.36
LRWT_f3p0_4885_transcript1704_g1	green	136.21	73.65	89.69	17.76	108.59	80.47	224.89	141.02	243.42	162.7	133.68	173.86	42.5	25.3	25.3
LRWT_f5p0_1248_transcript53979_g1	green	28.85	99.7	122.88	79.86	62.96	158.48	174.13	65.48	186.52	324.59	112.65	200.95	69.88	154.12	154.12
LRWT_f6p0_821_transcript73225_g2	green	85.06	167.35	49.37	225.78	304.95	193.66	79.47	119.5	100.95	271.25	152.37	138.9	111.85	64.23	64.23
LRWT_f7p0_1868_transcript32960_g1	green	129.62	112.45	118.02	146.92	221.86	230.13	233.08	219.29	231.39	215.07	183.6	217.7	132.41	125.48	125.48
LRWT_f2p0_2309_transcript23811_g3	green	267.74	247.4	290.55	308.55	359.64	333.17	347.6	295.96	289.39	343.32	351.83	321.7	242.49	204.92	204.92
LRWT_f6p0_2133_transcript26794_g1	green	138.78	142.76	148.76	139.46	219.31	202.51	237.88	236.57	214.29	190.05	195.39	196.13	120.01	122.7	122.7
LRWT_f35p0_408_transcript93703_g1	green	81.74	83.53	173.24	258.13	230.72	248.58	230.9	148.76	266.86	238.57	219.51	250.06	112.07	171.11	171.11
LRWT_f102p0_1800_transcript30671_g1	green	298.15	241.11	277.4	406.38	370	366.88	323.12	317.51	359.23	368.52	321	325.53	244.4	240.04	240.04
LRWT_f16p0_1131_transcript59503_g1	green	15.2	17.88	15.61	209.97	264.1	144.19	122.72	86.68	77.3	274.55	148.29	240.65	150.43	115.31	115.31
LRWT_f16p0_2021_transcript28993_g1	green	153.43	221.73	181.04	210.49	146.29	302.12	578.38	176.34	241.36	596.85	428.22	252.73	307.75	187.04	187.04
LRWT_f6p0_1430_transcript48198_g1	green	402.06	394.43	345	447.08	447.36	402.63	409.41	462.05	384.83	457.32	502.47	437.91	344.06	312.91	312.91
LRWT_f172p0_2459_transcript19759_g1	green	115.91	104.8	109.95	191.43	204.48	184.14	180.58	172.85	223.76	267.61	221.72	254.7	139.1	130.53	130.53
LRWT_f159p0_1134_transcript59256_g1	green	152.05	205.26	171.36	194.32	207.41	351.06	631.79	221.15	395.84	384.31	240.88	607.57	243.89	236.46	236.46
LRWT_f2p0_1393_transcript50405_g16	green	395.4	414.22	383.28	476.6	488.88	458.89	413.99	425.87	400.73	477.56	499.46	487.43	456.66	383.94	383.94
LRWT_f2p0_1362_transcript51119_g5	green	126.41	85.82	54.52	41.35	55.88	46.92	201.66	147.17	183.19	137.94	120.38	97.62	103.64	66.74	66.74
LRWT_f2p0_756_transcript77089_g6	green	143.8	87.81	70.93	3.28	149.98	51.58	3.83	132.82	216.34	158.57	134.6	110.98	140.26	56.56	56.56
LRWT_f8p0_1498_transcript45862_g2	green	1.33	2.17	2.82	98.8	88	99.59	115.63	104.18	138.46	139.31	124.61	140.05	67.88	11.74	11.74
LRWT_f14p0_893_transcript70053_g2	green	52.56	153.18	118.52	145.53	152.09	246.44	113.3	233.02	127.61	317.73	252.52	225.53	186.63	158.06	158.06
LRWT_f125p0_1732_transcript33460_g1	green	270.49	269.04	297.54	327.3	392.55	438.07	337.62	290.7	383.93	532.09	366.1	382.19	287.99	306.02	306.02
LRWT_f2p0_1492_transcript46339_g5	green	121.15	105.3	117.29	58.2	92.27	101.02	246.59	194.99	183.56	259.43	168.74	225.12	120.2	156.26	156.26
LRWT_f9p0_1269_transcript51943_g1	green	61.32	73.57	66.02	172.91	172.41	159.13	211.15	239.75	268.95	229.99	155.67	227.55	161.06	174.48	174.48
LRWT_f4p0_2150_transcript25412_g1	green	78.63	46.59	70.82	152.2	134.88	119.53	110.02	76.42	292.84	184.56	144.77	167.17	84	121.92	121.92
LRWT_f5p0_2943_transcript13964_g1	green	112.69	39.06	74.82	48.9	119.38	86.98	87.65	87.38	124.63	129.59	48.13	147.47	74.36	46.58	46.58
LRWT_f6p0_995_transcript63623_g1	green	113.16	37.16	130.12	140.8	105.09	173.55	196.83	123.71	172.57	92.55	76.04	134.59	56.85	61.65	61.65
LRWT_f9p0_2226_transcript24520_g1	green	123.29	68.35	126.29	149.35	146.49	182.69	185.85	146.07	300.2	77.31	146.95	181.79	73.85	102.34	102.34
LRWT_f2p0_856_transcript72154_g10	green	16.98	27.03	10.57	131.17	158.06	156.41	91.56	57.05	152.4	146.01	111.79	121.08	113.85	93.44	93.44
LRWT_f2p0_2875_transcript14997_g3	green	294.19	277.9	271.79	197.58	308.89	283.63	358.27	275.29	381.7	385.24	403.65	416.6	252.21	249.6	249.6
LRWT_f4p0_2059_transcript27421_g2	green	101.31	79.55	97.67	62.31	79.65	118.04	45.5	195.99	42.03	251.5	274.03	144.82	95.2	61.99	61.99
LRWT_f11p0_1858_transcript31908_g1	green	36.08	22.37	22.03	69.02	88.28	87.59	112.84	184.82	193.27	87.49	95.74	67.71	59.98	35.05	35.05
LRWT_f3p0_1579_transcript43256_g3	green	19.23	37.4	45.27	59.09	70.45	44.44	132.69	102.13	213.8	194.68	104.2	111.2	82.74	111.22	111.22
LRWT_f3p0_2288_transcript24298_g5	green	204.18	206.86	213.32	244.92	271.6	258.29	250.59	248.6	239.16	272.58	280.59	290.77	207.5	173.36	173.36
LRWT_f9p0_1012_transcript62560_g1	green	97.25	108.73	131.06	281.72	232.04	221.91	180.74	167.52	222.09	302.27	224.06	249.39	206.88	217.89	217.89
LRWT_f2p0_973_transcript66900_g13	green	15.73	1.88	159.7	4.39	63.56	29.93	64.47	69.01	168.55	78.13	82.32	25.54	57.02	4.92	4.92
LRWT_f5p0_1614_transcript41802_g1	green	53.08	25.69	27.02	101.37	61.79	42.18	135.67	217.19	196.17	104.8	42.89	91.96	83.22	30.98	30.98
LRWT_f25p0_1382_transcript49735_g1	green	5.22	7.24	3.59	93.84	79.76	65.88	79.96	60.97	98.43	96.61	141.27	76.47	51.55	24.41	24.41
LRWT_f21p0_1134_transcript57716_g1	green	75.74	81.11	107.7	208.81	175.28	195.01	158.33	159.78	143.72	179.44	188.61	186.4	147.98	124.4	124.4
LRWT_f10p0_950_transcript66981_g2	green	37.48	26.68	49.21	34.26	104.54	85.96	160.18	54.31	124.38	94.29	103.34	150.99	79.61	98.14	98.14
LRWT_f3p0_1655_transcript40586_g2	green	457.95	456.11	480.88	505.76	521.57	525.61	479.62	516.37	487.92	528	533.16	547.97	454.55	465.88	465.88
LRWT_f47p0_1863_transcript32559_g1	green	84.07	101.93	84.33	143.37	142.22	135.69	147.23	111.59	194.34	257.3	165.55	247.22	105.43	112.25	112.25
LRWT_f21p0_1445_transcript46989_g1	green	338.15	365.09	320.41	254.58	296.65	335.18	393.18	449.62	387.38	347.26	371.39	386.45	348.12	317.45	317.45
LRWT_f9p0_1370_transcript50179_g1	green	83.09	82.09	85.99	85.77	128.96	120.54	84.95	74.22	139.23	156.49	118.21	174.25	59.38	56.07	56.07
LRWT_f4p0_1270_transcript54709_g3	green	276.6	270.47	287.01	239.3	321.75	274.06	356.6	304.91	316.66	306.56	331	302.09	243.72	204.26	204.26
LRWT_f18p0_1962_transcript30474_g1	green	161.92	154.98	157.02	192.35	202.84	235.05	182.79	184.29	194.56	230.7	224.87	223.21	126.24	127.03	127.03
LRWT_f3p0_1425_transcript48588_g2	green	38.79	100.57	106.59	210.11	199.1	115.61	148.24	119.03	175.05	152.25	179.66	163.25	155.36	123.21	123.21
LRWT_f5p0_1557_transcript42477_g1	green	122.9	90.41	111.82	122.86	157.88	122.48	84.52	157.11	241.05	148.79	143.95	244.12	91.44	93.72	93.72
LRWT_f14p0_1899_transcript32578_g1	green	114.73	117.25	117.45	115.6	138.4	88.64	185.28	170.31	139.23	147.68	190.45	150.5	109.88	66.42	66.42
LRWT_f16p0_1813_transcript34443_g1	green	161.21	121.52	76.97	121.34	118.72	138.59	219.04	186.77	233.48	189.9	193.58	176.07	173.54	135.79	135.79
LRWT_f9p0_767_transcript75113_g2	green	81.76	55.47	111.13	86.07	179.92	171.52	97.9	145.19	146.15	110.2	165.12	127.8	61.72	86.7	86.7
LRWT_f14p0_1762_transcript35364_g1	green	160.59	115.46	99.94	157.09	180.73	127.44	152.38	163.44	146.78	231.1	256.97	218.19	130.87	70.36	70.36
LRWT_f13p0_782_transcript73053_g1	green	56.45	32.79	61.8	76.19	28.73	37.88	83.83	102.22	15.85	69.22	106.19	59.14	28.73	26.88	26.88
LRWT_f7p0_795_transcript73923_g1	green	255.3	280.35	248.03	363.09	342.47	367.25	292.76	278.79	278.62	372.1	343.34	356.77	252.98	258.17	258.17
LRWT_f8p0_1356_transcript50939_g4	green	270.61	300.34	249.75	288.22	301.69	303.46	341.06	328.85	353.79	390.72	345.81	357.14	287.97	295.9	295.9
LRWT_f2p0_1187_transcript58178_g7	green	0	0.13	0	8.51	14.19	28.95	63.72	41.93	99.45	35.6	68	75.36	16.79	47.22	47.22
LRWT_f5p0_1320_transcript52439_g3	green	0.26	1.15	0.46	38.19	25.89	61.66	498.19	42.68	109.07	13.2	222.07	80.44	18.96	34.63	34.63
LRWT_f82p0_968_transcript65043_g1	green	27.34	28.03	18.93	162.09	172.68	178.47	203.89	163.29	217.57	219.41	164.9	205.62	143.78	169.9	169.9
LRWT_f3p0_3182_transcript11231_g1	green	273.21	225.87	305.87	249.97	323.66	311.78	286.58	281.88	287.67	258.56	307.91	314.78	259.37	212.52	212.52
LRWT_f3p0_2771_transcript16775_g2	green	139.67	135.64	116.31	131.26	177.45	210.37	170.42	189.76	215.07	202.92	163.86	190.89	149.43	147.61	147.61
LRWT_f6p0_1372_transcript50353_g4	green	89.83	134.79	192.68	134.31	160.38	150.1	235.13	323.38	115.24	194.37	168.57	191.97	127.84	170.85	170.85
LRWT_f2p0_1267_transcript54938_g12	green	1.56	6.27	4.1	5.64	9.82	6.04	70.05	49.5	153.85	136.24	57.34	89.79	26.51	31.62	31.62
LRWT_f2p0_873_transcript71343_g4	green	13.62	4.59	11.34	80.51	65.35	39.61	73.25	23.29	67.28	95.32	91.53	198.31	47.63	31.01	31.01
LRWT_f5p0_1710_transcript38715_g3	green	340.01	300.51	342.9	409.04	415.76	411.64	381.05	406.62	416.78	443.89	429.05	449.69	406.32	312.51	312.51
LRWT_f104p0_1919_transcript29299_g1	green	113.37	124.08	99.36	168.5	170.56	145.1	143.4	144.93	165.02	159.52	179.82	170.21	118.77	114.45	114.45
LRWT_f2p0_897_transcript70261_g10	green	128.98	83.14	64.79	104.07	135.5	153.83	82.53	85.02	169.7	149.87	152.36	144.99	134.86	101.36	101.36
LRWT_f3p0_2675_transcript17784_g1	green	146.21	103.71	109.8	65.41	107.64	120.41	162.17	142.32	170.05	145.22	132.29	137.08	90.45	75.5	75.5
LRWT_f5p0_1076_transcript61351_g2	green	280.28	280.69	290.3	263.39	314.84	284.47	331.76	360.68	311.56	368.63	385.5	390.51	251.96	268.02	268.02
LRWT_f12p0_1566_transcript42607_g1	green	241.06	275.83	236.26	217.82	275.51	251.66	340.56	263.62	241.69	264.79	266.33	293	205.14	199.93	199.93
LRWT_f90p0_1923_transcript28758_g1	green	133.04	123.57	132.72	190.42	199.93	205.7	202.27	217.37	192.93	210.56	218.85	244.52	188.5	169.49	169.49
LRWT_f12p0_1384_transcript49255_g2	green	64.02	129.32	93.41	94.33	122.31	153.25	178.27	116.79	195.74	143.18	73.33	121	91.23	113.73	113.73
LRWT_f3p0_2596_transcript19239_g5	green	76.51	85.38	88.9	168.9	194.08	192.19	177.81	176.21	184.34	165.04	179.18	181.36	134.94	111.41	111.41
LRWT_f18p0_1491_transcript45910_g3	green	81.08	89.99	93.13	151.65	145.71	157.27	120.26	98.78	80.15	185.39	134.45	146.19	109.86	113.02	113.02
LRWT_f3p0_2772_transcript15912_g1	green	26.9	42.11	79.46	31.63	52	99.76	48.72	48.75	202.27	242.71	95.7	46.8	25.71	21.13	21.13
LRWT_f7p0_1546_transcript44064_g2	green	0.13	0	0.84	1.76	7.28	7.37	134.82	17.56	73.05	24.54	109.53	92.7	36.77	43.1	43.1
LRWT_f13p0_1683_transcript36192_g1	green	17.38	13.38	5.28	23.58	41.64	41	78.57	122.17	95.63	42.4	91.25	52.12	46.35	65.59	65.59
LRWT_f4p0_1488_transcript45735_g5	green	82.88	79.41	74.57	117.19	135.27	131.12	109.07	124.9	114.9	149.99	137.58	140.84	97.02	81.13	81.13
LRWT_f3p0_926_transcript68704_g2	green	271.96	297.27	289.91	298.03	323.96	353.88	348.21	300.14	406.87	407.37	297.62	331.66	341.39	320.12	320.12
LRWT_f14p0_832_transcript72771_g1	green	26.28	63.66	18.85	14.78	62.09	72.44	37.11	11.86	73.29	113.61	99.77	53.87	28.41	16.49	16.49
LRWT_f100p0_2987_transcript11640_g1	green	147.51	125.21	140.27	121.55	162.49	146.16	188.37	179.63	192.56	158.68	154.96	173.63	127.03	114.23	114.23
LRWT_f9p0_1606_transcript41530_g1	green	93.95	44.89	50.07	48.11	39.26	88.83	84.44	109.44	54.01	131.64	138.91	78.08	42.41	70.11	70.11
LRWT_f3p0_1835_transcript34394_g2	green	27.15	93.51	19.55	39.99	32.84	57.68	86.52	62.2	19.49	70.18	57.75	95.77	49.01	12.61	12.61
LRWT_f2p0_3570_transcript6556_g1	green	265.12	283.15	156.14	247.92	281.4	298.24	269.67	275.9	257.76	372.46	287.99	372.65	230.75	165.52	165.52
LRWT_f3p0_1839_transcript34778_g7	green	71.9	67.38	79.04	62.34	109.44	75.58	136.37	121.73	125.54	111.86	117.54	114.78	80.57	87.71	87.71
LRWT_f3p0_2380_transcript22570_g2	green	248.68	217.04	232.4	200.1	232.19	230.93	259.74	253.83	269.05	246.72	258.48	238.46	208.51	207.25	207.25
LRWT_f3p0_927_transcript68878_g2	green	75.67	109.63	110.99	172.33	139.37	128.24	79.4	120.35	143.82	223.86	183.29	252.53	99.76	99.21	99.21
LRWT_f5p0_2009_transcript29480_g2	green	57.79	46.87	40.57	49.75	92.41	60.17	38.95	53.57	80.47	76.39	81.3	86	32.48	29.01	29.01
LRWT_f4p0_1166_transcript57143_g1	green	41.86	21.8	49.27	128.46	112.73	106.25	101.95	77.37	130.62	182.26	128.95	141.07	79.25	109.67	109.67
LRWT_f2p0_1095_transcript61782_g9	green	109.05	87.05	109.26	77.38	80.63	100.86	140.37	118.4	121.63	96.04	131.65	128.88	74.98	77.47	77.47
LRWT_f2p0_2589_transcript19173_g3	green	65.72	41.58	68.38	33.69	71.15	99.9	111.42	47.37	80.25	61.97	89.82	54.01	31.73	34.1	34.1
LRWT_f2p0_1947_transcript31513_g3	green	58.88	44.07	36.65	33.66	65.73	69.76	71.15	68.59	117.13	89.28	64.25	75.58	31.09	28.45	28.45
LRWT_f3p0_2662_transcript18024_g3	green	45.56	48.09	46.71	80.22	119.36	112.56	105.38	85.41	124.06	107.71	85.23	94.79	72.57	81.13	81.13
LRWT_f3p0_1686_transcript39504_g5	green	68.36	85.21	57.6	53.19	48.94	111.25	95.75	108.48	128.02	99.77	80.85	54.83	50.66	72.94	72.94
LRWT_f6p0_1678_transcript39541_g4	green	41.41	33.73	65.76	114.88	77.23	77.5	97.11	310.7	121.77	123.18	71.6	43.76	64.62	80.81	80.81
LRWT_f5p0_1596_transcript42505_g3	green	68.23	35.29	35.75	24.72	30.4	78.73	80.47	48.46	90.39	103.53	77.08	42.21	14.9	60.88	60.88
LRWT_f9p0_1287_transcript53754_g1	green	108.83	71.99	91.61	152.67	141.58	111.93	125.5	111.12	142.2	130.23	133.96	97.05	85.48	107.29	107.29
LRWT_f3p0_2686_transcript17904_g1	green	36.06	37.81	23.87	8.51	44.21	50.73	27.1	49.71	61.05	87.36	58.86	79.55	18.76	8.43	8.43
LRWT_f4p0_1979_transcript29295_g1	green	33.35	18.03	19.77	39.46	66.91	77.09	105.96	78.96	175.33	75.61	109.87	85.74	57.09	54.29	54.29
LRWT_f4p0_1972_transcript29808_g2	green	147.06	228.54	250.57	303.08	285.07	313.25	265.41	133.11	280.19	299.07	300.37	319.76	287.87	284.25	284.25
LRWT_f9p0_2085_transcript27804_g2	green	123.01	105.51	141.87	149.4	121.18	146.35	125.61	186.96	153.66	137.01	147.3	128.49	22.71	52.09	52.09
LRWT_f2p0_1085_transcript62115_g2	green	199.36	211.72	206.05	253.77	242.89	271.53	279.8	279.87	261.1	375.81	284.84	300.77	282.8	280.28	280.28
LRWT_f3p0_2238_transcript24981_g1	green	92.73	82.45	97.86	104.41	100.7	131.62	116.52	112.06	141.93	135.26	130.37	119.82	87.52	140.42	140.42
LRWT_f72p0_1777_transcript34624_g1	green	116.25	97.32	104.13	167.1	179.02	177.42	183.72	158.8	203.85	187.88	173.3	150.28	141.2	158.73	158.73
LRWT_f4p0_1615_transcript41960_g6	green	25.5	34.48	16.33	48.97	38.3	38.87	49.42	81.63	52.95	94.6	74.82	93.33	91.73	54.55	54.55
LRWT_f17p0_2535_transcript19296_g1	green	109.79	101.43	103.33	98.37	119.88	125.62	170.27	152.99	150.79	138.87	134.39	144.43	99.34	106.39	106.39
LRWT_f56p0_1524_transcript41491_g1	green	100.72	123.26	108.66	102.78	160.71	112.46	127.3	84.65	103.39	138.01	146.75	136.97	84.02	90.33	90.33
LRWT_f43p0_1189_transcript56770_g1	green	84.36	76.57	88.73	123.02	132.43	116.29	116.4	117.28	93.49	102.46	130.02	111.85	116.07	83.27	83.27
LRWT_f3p0_2360_transcript22961_g1	green	92.36	75.43	76.38	109.55	122.57	115.51	101.77	107.23	121.76	125.36	128.05	130.14	86.38	69.11	69.11
LRWT_f2p0_3630_transcript6930_g6	green	77.98	83.79	84.7	64.55	113.21	98.35	131.17	142.26	127.09	100.67	109.66	116.21	87.36	74.47	74.47
LRWT_f12p0_1002_transcript65461_g1	green	21.44	10.08	44.79	75.61	12.08	41.2	59.04	62.32	84.4	66.39	47.17	27.35	37.71	36.96	36.96
LRWT_f13p0_2438_transcript21356_g2	green	29.8	12.75	18.69	24.7	97.92	57.17	241.08	155.27	180.93	48.81	62.22	47.38	33.23	37.96	37.96
LRWT_f11p0_674_transcript79709_g1	green	2.89	39.95	8	19.55	110.68	3.23	1.98	5.64	221.36	480.18	91.06	51.54	41.3	4.08	4.08
LRWT_f67p0_1930_transcript28730_g1	green	154.54	114.68	168.92	143.79	187.23	131.72	214.05	186.42	199.89	148.28	172.55	192.86	155.05	137.49	137.49
LRWT_f4p0_698_transcript79078_g4	green	41.31	38.98	74.21	34.06	113.09	92.29	81.9	53.07	92.29	84.67	86.57	44.98	70.61	58.12	58.12
LRWT_f2p0_1569_transcript43704_g11	green	44.97	35.25	27.62	24.5	59.06	40.8	62.18	69.59	120.88	62.09	46.49	64.86	26.66	22.66	22.66
LRWT_f2p0_1711_transcript39076_g9	green	35.16	17.31	0	45.94	12.09	10.46	67.59	65.74	64.37	36.29	9.38	63.49	0	0.29	0.29
LRWT_f13p0_826_transcript72578_g1	green	56.06	57.14	46.59	115.61	88.14	89.96	62.95	81.89	85.58	135.56	87.33	115.68	70.07	97.13	97.13
LRWT_f24p0_1854_transcript31089_g1	green	40.71	26.04	67.62	38.14	46.97	38.8	64.14	92.47	100.06	70.82	27.91	58.58	32.18	23.56	23.56
LRWT_f2p0_2489_transcript21021_g3	green	123.84	109.93	121.63	114.91	125.77	146.39	147.69	126.96	147.84	137.87	145.83	142.53	146.52	98.25	98.25
LRWT_f3p0_1467_transcript47625_g7	green	22.52	19.07	16.55	57.93	92.42	39.77	40.33	43.75	79.17	63.81	71.68	60.67	45.71	27.29	27.29
LRWT_f2p0_1139_transcript60126_g8	green	34.41	35.19	32.46	32.88	40.88	35.43	47.48	78.32	85.49	71.42	89.77	112.22	51.12	56.74	56.74
LRWT_f5p0_262_transcript103929_g6	green	14.79	23.65	9.6	5.76	43.23	11.21	86.02	33.59	47.87	46.35	23.62	32.44	0	7.07	7.07
LRWT_f5p0_1952_transcript30621_g1	green	4.92	0	17.24	10	11.66	22.38	35.01	163.68	127.16	18.69	158.94	118.94	62.36	26.52	26.52
LRWT_f4p0_2034_transcript29219_g4	green	92.28	78.24	73.31	75.97	100.08	84.56	116.07	100.77	103.92	133.83	119.78	121.34	75.91	58.63	58.63
LRWT_f20p0_1528_transcript44416_g1	green	60.46	41.87	55.68	40.16	82.92	72.26	72.81	54.86	70.17	88.14	62.05	39.36	30.77	33.57	33.57
LRWT_f9p0_1780_transcript34646_g1	green	70.54	17.63	35.83	21.15	44.45	33.12	100.32	59.71	90.98	19.89	38.37	71.46	16.16	29.09	29.09
LRWT_f2p0_700_transcript80012_g14	green	48.47	89.6	57.43	44.12	82.18	60.74	103.66	131.55	68.58	109.19	83.45	66.25	57.09	51.6	51.6
LRWT_f7p0_872_transcript70841_g2	green	117.98	133.88	136.16	129.3	158.65	145.83	126.96	112.43	130.64	152.77	177.05	146.5	100.73	110.09	110.09
LRWT_f6p0_2027_transcript29085_g2	green	85.57	75.24	77.19	89.17	100.08	105.22	95.93	115.84	104.19	119.59	105.43	112.97	80.09	75.03	75.03
LRWT_f3p0_1838_transcript34521_g1	green	78.46	43.93	67.67	73.73	101.46	109.04	105.47	121.77	342.9	102.4	188.17	89.64	87.32	80.03	80.03
LRWT_f2p0_1624_transcript41641_g5	green	34.19	49.26	32.82	27.35	50.51	11.2	60.61	44.76	63.54	76.89	40.34	95.48	21.6	24.59	24.59
LRWT_f5p0_1074_transcript62427_g2	green	274.49	254.67	232.24	349.17	286.89	287.73	264.12	317.48	223.87	280.92	290.18	303.9	219.78	262.62	262.62
LRWT_f2p0_1883_transcript33670_g11	green	163.03	165.22	153.24	213.74	225.95	224.83	209.15	215.53	201.66	211.3	217.57	219.08	180.83	156.96	156.96
LRWT_f77p0_2398_transcript20785_g1	green	59.01	56.67	48.11	73.97	75.77	53.77	112.14	54.85	99.51	93.79	83.25	100.98	69.3	44.88	44.88
LRWT_f16p0_1779_transcript33841_g1	green	8.27	21.52	17.91	37.83	43.2	37.04	21.31	44.21	41.33	57.2	46.14	61.89	32.24	20.31	20.31
LRWT_f84p0_886_transcript67952_g1	green	53	71.69	109.3	132.3	93.83	113.64	94.74	107.06	117.79	203.79	117.13	183.11	114.35	80.97	80.97
LRWT_f5p0_1500_transcript45115_g1	green	34.44	45.34	30.76	22.32	36.99	61.19	172.92	76.83	66.75	52.55	14.29	60.1	21.56	22.74	22.74
LRWT_f36p0_1593_transcript41745_g1	green	1.21	1.09	14.77	20.72	24.8	31.7	45.23	3.38	57.99	9.34	44.34	55.67	0.38	18.73	18.73
LRWT_f3p0_1478_transcript46916_g3	green	181.51	177.48	196.79	173.82	189.73	185.01	222.7	233.16	241.97	228.66	182.59	226.6	190.87	197.02	197.02
LRWT_f4p0_1442_transcript47897_g2	green	245.59	256.03	218.77	271.21	229.45	264.86	232.75	241.85	332.41	286	265.49	260.76	234.15	264.44	264.44
LRWT_f3p0_760_transcript76888_g2	green	27.29	72.99	33.64	37.89	48.2	64.22	63.34	73.72	87.05	45.96	184.25	92.21	65.19	60.31	60.31
LRWT_f15p0_2603_transcript18091_g1	green	129.96	117.74	126.07	138.96	158.5	143.72	156.04	166.38	170.58	161.12	153.89	158.23	144.99	129.76	129.76
LRWT_f12p0_1464_transcript44781_g1	green	107.35	116.16	115.02	150.64	150.55	168.83	132.24	129.87	147.2	146.31	142.09	160.22	120.45	118.76	118.76
LRWT_f3p0_999_transcript66668_g9	green	67.81	71.61	68.03	89.62	84.77	77.37	66.75	69.95	67.52	85.92	97.24	97.05	49.1	54.46	54.46
LRWT_f44p0_1813_transcript32738_g1	green	77.03	65.04	61.99	53.1	58.39	53.82	106.74	84.25	65.17	85.54	85.48	100.28	82.24	79.85	79.85
LRWT_f2p0_1967_transcript30896_g4	green	4.08	2.03	0.88	14.12	26.49	18.86	167.8	33.27	19.32	46.34	42.26	35.08	11.04	16.02	16.02
LRWT_f2p0_889_transcript71018_g16	green	21.49	38.46	28.35	9.66	17.35	22.48	68.75	21.79	54.23	20.45	54.97	50.36	35.87	37.82	37.82
LRWT_f2p0_2156_transcript26715_g4	green	39.83	40.18	48.82	29.12	76.6	66.56	71.27	64.02	83.87	73.04	67.48	62.35	17.63	32.75	32.75
LRWT_f2p0_1584_transcript43105_g6	green	36.27	28.54	26.65	10.22	30.07	19.18	81.65	97.81	95.73	132.71	78.71	135.99	25.08	15.85	15.85
LRWT_f9p0_531_transcript87869_g2	green	83.5	71.63	51.17	53.42	146.65	53.31	67.38	74.28	89.03	109.06	69.86	66.72	62.01	50.36	50.36
LRWT_f3p0_1489_transcript46606_g4	green	61.6	54.48	42.73	70.74	57.16	98.5	98.7	56.72	47.46	48.02	57.36	120.17	42.05	41.69	41.69
LRWT_f3p0_3394_transcript8004_g1	green	96.57	74.65	78.08	68.92	96.13	84.68	77.71	104.08	163.03	101.03	82.83	98.99	64.11	67.61	67.61
LRWT_f3p0_2794_transcript16048_g1	green	68.5	48.5	62.67	114.92	108.65	96.6	103.79	96.02	95.17	101.06	112.09	109.91	82.51	46.36	46.36
LRWT_f4p0_3335_transcript9249_g1	green	0	0.07	0.02	5.53	27.34	18.3	39.47	14.04	40.24	32.08	51.3	47.24	25.49	12.18	12.18
LRWT_f3p0_2471_transcript20813_g1	green	35.66	25.45	10.35	11.16	26.12	25.04	42.26	28.4	24.84	43.32	10.79	5.17	11.98	2.46	2.46
LRWT_f5p0_1685_transcript39409_g5	green	79.47	61.9	81.88	95.07	105.84	109.78	85.82	93.07	101.68	171.84	101.18	136.11	48.89	46.52	46.52
LRWT_f38p0_1684_transcript37978_g1	green	82.05	100.87	95	107.72	131.23	115.24	103.78	73.29	81.51	97.94	123.65	94.56	42.4	79.98	79.98
LRWT_f8p0_1222_transcript56138_g1	green	49.17	53.52	51.29	42.49	59.51	55.97	62.84	66.49	83.84	75.23	75.92	89.98	30.01	34.92	34.92
LRWT_f3p0_1219_transcript57054_g8	green	106.5	113.06	91.6	141.58	137.51	129.19	100.27	128.32	103.39	141.7	148.34	149.37	132.49	118.13	118.13
LRWT_f4p0_1371_transcript50810_g5	green	1.45	0.94	3.45	18.7	19.08	17.61	88.96	50.2	51.06	36.38	32.96	23.27	5.51	25.08	25.08
LRWT_f61p0_2134_transcript25603_g1	green	124.18	113.55	107.78	107.09	123.64	136.36	122.87	105.22	127.41	133.64	134.62	120.87	106.44	94.37	94.37
LRWT_f4p0_2168_transcript26191_g3	green	70.86	57.5	90.61	85.14	92.83	85.61	78.6	64.96	69.69	92.62	97.79	91.61	77.14	50.88	50.88
LRWT_f3p0_2178_transcript26414_g4	green	297.46	284.51	294.37	294.21	308.66	294.92	323.07	304.17	296.37	385.94	388.65	398.71	313.02	272.92	272.92
LRWT_f2p0_2610_transcript18815_g4	green	37.06	60.46	33.26	56.71	56.97	38.4	125.98	52.51	49.77	26.39	43.78	49.55	19.27	18.05	18.05
LRWT_f4p0_953_transcript67663_g4	green	114.26	128.16	127.75	189.31	149.46	152.15	124.34	121.55	152.13	196	194.99	172.18	132.48	139.28	139.28
LRWT_f6p0_1730_transcript36601_g2	green	50.96	58.5	42.76	55.72	72.12	64.24	36.85	41.6	114.64	86.73	54.37	91.58	47.42	40.7	40.7
LRWT_f3p0_2384_transcript22671_g3	green	65.8	56.58	82.75	56.25	106	86.58	93.66	96.75	90.79	100.36	84.01	93.39	75.82	48.45	48.45
LRWT_f6p0_1450_transcript47432_g4	green	147.07	130.72	148.92	127.45	166.66	161.63	162.78	154.19	198.24	213.61	138.49	174.83	140.85	148.04	148.04
LRWT_f53p0_1768_transcript36023_g1	green	79.13	70.58	76.08	84.07	126.53	85.18	76.07	80.28	102.42	182.38	131.61	191.18	85.41	98.1	98.1
LRWT_f2p0_1432_transcript48602_g14	green	37.18	44.49	49.61	69.94	68.55	84.82	49.22	45.03	66.36	89.49	63.48	78.61	44.87	51.06	51.06
LRWT_f25p0_1372_transcript49129_g1	green	13.1	13.26	7.54	34.95	45.21	68.69	50.15	52.67	148.44	57.6	58.28	61.62	33.66	34.62	34.62
LRWT_f8p0_2705_transcript16317_g1	green	85.05	97.76	113.23	95.27	105.01	110.1	108.37	107.99	91.18	154.13	91.35	114.12	64.12	75.68	75.68
LRWT_f4p0_247_transcript100961_g1	green	6.47	0	12.89	113.37	37.07	25.1	15.81	0	0	60.35	11.37	18.64	0	12.77	12.77
LRWT_f16p0_1010_transcript63129_g1	green	33.55	17.76	21.73	11.85	57.49	30.86	30.05	3.77	47.5	61.29	48.47	45.99	20.04	23.26	23.26
LRWT_f2p0_2304_transcript23903_g4	green	44.88	27.8	36	26.14	63.19	58.43	37.88	58.54	80.36	56.26	39.78	48.84	36.35	27.6	27.6
LRWT_f10p0_1436_transcript46903_g1	green	174.98	210.06	210.21	219.49	216.78	222.38	199.73	213.01	194.55	222.74	222.28	246.75	182.28	182.33	182.33
LRWT_f5p0_1836_transcript33232_g1	green	56.05	50.52	52.49	51.54	62.62	65.78	76.8	82.1	79.49	85.9	69.24	72.26	38.17	49.5	49.5
LRWT_f2p0_1909_transcript32488_g1	green	14.19	12.66	12.04	21.37	44.16	36.49	44.25	46.07	59.5	38.7	35.4	45.58	22.16	23.33	23.33
LRWT_f3p0_1975_transcript30817_g6	green	84.74	65.89	78.28	96.79	107.81	106.13	98.81	95.08	94.07	91.19	98.06	110.71	73.15	57.54	57.54
LRWT_f6p0_1779_transcript34833_g1	green	41.38	41.92	31.58	24.26	29.84	29.91	49.41	46.91	58.49	56.74	53.36	59.73	26.27	20.02	20.02
LRWT_f2p0_791_transcript75441_g23	green	110.64	110.18	105.7	122.57	129.49	152.03	125.07	157.3	139.16	155.37	115.71	147.63	120.61	118.71	118.71
LRWT_f4p0_2279_transcript23471_g1	green	89.12	92.69	100.17	120.82	127.59	155.98	133.49	129.14	134.84	133.63	123.69	135.61	96	85.7	85.7
LRWT_f2p0_1310_transcript53041_g5	green	54.39	32.17	42.49	26.71	45.99	54.14	65.9	60.79	71.05	84.48	59.03	56.31	31.24	41.22	41.22
LRWT_f14p0_847_transcript71066_g2	green	15.32	21.12	20.04	32.46	37.2	30.78	42.94	98.52	167.05	49.79	55.41	59.14	41.29	38.07	38.07
LRWT_f2p0_799_transcript75977_g19	green	8.92	12.34	10.49	9.7	82.8	77.01	0.14	50.73	25.61	65.76	43.72	87.01	9.89	13.91	13.91
LRWT_f2p0_1754_transcript37257_g6	green	39.4	25.06	36.69	16.97	36.54	18.86	63.04	43.85	47.69	33.66	45.01	49.31	13.57	13.41	13.41
LRWT_f6p0_527_transcript88025_g2	green	55.16	51.18	45.06	76.24	99.73	66.81	53.66	52.9	80.94	76.51	52.04	74.73	62.93	66.58	66.58
LRWT_f14p0_1223_transcript55438_g1	green	28.36	30.73	30.97	43.83	60.41	62.24	63.16	51.39	63.09	60.24	49.06	61.4	43.45	47.29	47.29
LRWT_f3p0_1265_transcript54970_g5	green	49.06	42.69	39.23	60.14	54.03	51.87	55.07	61.45	67.22	68.39	57.44	69.33	24.95	29.96	29.96
LRWT_f3p0_2973_transcript13704_g1	green	72.42	66.96	59.26	73.77	93.04	83.91	95.02	83.76	85.36	95.21	95.79	93.5	69.28	66.4	66.4
LRWT_f2p0_491_transcript91226_g10	green	0.18	0	0.92	3.61	13.43	36.5	124.38	26.55	41.18	14.99	21.93	15.87	2.09	3.66	3.66
LRWT_f5p0_2910_transcript13625_g1	green	10.1	25.66	22.71	7.05	20.95	32.28	27.39	21.38	40.07	34.46	9.62	8.38	17.68	0.58	0.58
LRWT_f50p0_903_transcript68818_g1	green	65.08	58.29	47.52	43.71	48.78	65.45	84.93	81.21	64.51	67.52	79.13	96.47	78.72	71.68	71.68
LRWT_f2p0_3037_transcript13063_g3	green	12.95	38.89	17.31	16.63	7.69	20.55	76.2	27.12	20.68	31.74	98.5	26.74	0.09	2.26	2.26
LRWT_f3p0_1519_transcript45373_g2	green	50.56	61.75	40.83	47.65	78.3	64.57	39.83	48.28	47.99	56.2	89.94	80.75	65.1	14.47	14.47
LRWT_f2p0_1607_transcript42226_g6	green	16.29	12.89	9.88	33.54	49.21	34.82	16.17	12.51	37.96	34.59	48.83	23.44	25.38	11.1	11.1
LRWT_f3p0_1823_transcript34979_g1	green	17.69	17.01	31.69	32.77	26.1	61.5	29.09	8.5	52.09	10.8	28.08	41.59	28.99	15.24	15.24
LRWT_f102p0_2801_transcript11350_g1	green	109.45	104.05	116.16	97.85	114.15	130.52	86.18	106.58	129.18	107.21	120.46	129.16	96.15	93.32	93.32
LRWT_f3p0_1528_transcript44670_g1	green	85.2	78.32	70.95	70.67	82.05	87.57	111.17	103.83	100.11	102.45	80.44	100.72	71.05	75.08	75.08
LRWT_f2p0_904_transcript69943_g5	green	0	0	32.7	44.51	16.03	26.49	39.83	21.87	28.41	78.15	40.5	43.93	0.1	38.55	38.55
LRWT_f31p0_1596_transcript39194_g1	green	36.74	30.04	33.37	54.2	55.29	45.85	57.04	40.45	44.29	63.22	86.81	64.63	51.51	35.11	35.11
LRWT_f19p0_1048_transcript61909_g2	green	58.4	58.67	64.97	69.4	84.57	88.03	51.6	69.55	76.84	94.77	70.32	81.31	58.69	67.72	67.72
LRWT_f24p0_1173_transcript56080_g1	green	55.79	65.07	73.28	80.05	81.38	89.88	89.25	76.5	114.76	128.83	94.48	105.71	103.12	87.15	87.15
LRWT_f5p0_2350_transcript22303_g1	green	47.4	55.07	56.87	73.4	67.82	77.23	59.34	53.9	53.92	87.18	77.65	69.96	60.51	44.72	44.72
LRWT_f12p0_1904_transcript32269_g1	green	63.42	49.25	48.53	41.88	61.62	50.57	71.13	78.01	76.9	50.4	53.89	52.45	39.99	36.73	36.73
LRWT_f2p0_2116_transcript27645_g10	green	28.07	35.26	26.62	44.1	16.99	25.98	38.6	26.98	57.71	60.09	27.53	46.54	17	15.61	15.61
LRWT_f2p0_487_transcript91454_g13	green	24.83	5.32	17.45	0.98	13.22	10.23	31.15	22.7	35.25	10.77	20.44	24	2	2.68	2.68
LRWT_f5p0_1745_transcript34990_g1	green	12.16	59.35	62.27	52.97	58.35	48.76	48.85	44.03	37.01	101.66	67.04	59.5	30.82	46.18	46.18
LRWT_f7p0_1683_transcript39275_g2	green	39.62	40.46	39.45	63.44	60.37	73.66	47.11	49.88	82.24	85.84	53.61	51.63	34.92	37.43	37.43
LRWT_f2p0_2623_transcript18661_g3	green	22.48	21.17	26.35	24.56	37.01	25.99	39.92	36.81	46.56	29.13	46.04	39.57	19.92	12.75	12.75
LRWT_f6p0_1595_transcript42527_g1	green	8.71	5.01	7.01	13.2	23.71	26.57	64.35	24.71	48.46	37	35.54	49.92	21.55	27.06	27.06
LRWT_f2p0_1298_transcript53995_g14	green	40.26	63.44	39.49	81.85	58.67	69.03	29.65	109.84	77.91	94.63	73.9	86.98	72.94	63.12	63.12
LRWT_f9p0_1494_transcript43376_g1	green	46.29	44.34	43.39	44.94	59.08	66.59	70.68	55.52	62.39	61.17	66.03	60.03	55.73	42.18	42.18
LRWT_f15p0_2757_transcript15927_g1	green	77.01	90.67	72.57	64.11	96.2	77.66	100.58	120.44	103.87	99.92	92.77	103.84	93.88	82.48	82.48
LRWT_f56p0_1762_transcript35287_g1	green	106.84	100.92	100.57	91.36	112.41	97.95	147.19	133.92	137.26	112.09	110.49	117.09	95.18	70.78	70.78
LRWT_f13p0_925_transcript67392_g1	green	43.56	40.33	29.38	42.35	43.32	76.48	42.19	69.82	46.37	79.34	66.9	59.27	52.58	55.21	55.21
LRWT_f5p0_1850_transcript33943_g3	green	12.81	7.54	2.68	0	13.97	0	19.91	13.28	22.69	24.6	10.22	25.76	0	0	0
LRWT_f29p0_1180_transcript54953_g1	green	52.45	56.69	53.39	69.4	76.56	94.71	105.94	84.69	102.35	94.91	81.88	88.5	73.44	94.11	94.11
LRWT_f2p0_1865_transcript33852_g10	green	100.14	95.74	104.74	100.64	113.09	111.29	113.77	105.95	119.25	129.57	147.04	136.74	93.41	88.45	88.45
LRWT_f4p0_677_transcript80112_g5	green	32.92	42.22	33.54	28.62	50.09	43.12	61.73	48.16	56.98	62.81	47.96	46.16	11.89	16.48	16.48
LRWT_f2p0_1654_transcript40626_g4	green	55.46	70.04	74.11	85.22	93.15	111.22	106.93	91.17	157.62	111.05	89.78	103.31	88.3	94.4	94.4
LRWT_f2p0_719_transcript79795_g18	green	17.45	32.67	24.04	22.32	64.62	34.89	27.57	51.99	4.8	48.18	21	42.76	37.15	9.29	9.29
LRWT_f13p0_1617_transcript40481_g1	green	87.52	64.14	79.7	117.01	87.1	105.82	88.3	86.15	128.58	101.37	91.88	117.78	81.43	77.42	77.42
LRWT_f13p0_1803_transcript32958_g1	green	64.86	55.66	68.97	56.07	77.37	82.7	67.3	70.4	58.84	71	69.05	81.32	55.29	46.61	46.61
LRWT_f31p0_1619_transcript38746_g2	green	28.02	22.41	25.37	31.74	43.99	39.76	46.94	101.59	13.48	81.62	86.59	45.43	33.13	35.39	35.39
LRWT_f5p0_879_transcript70824_g3	green	16.01	16.26	20.25	19.8	1.79	22.32	26.14	37.18	42.87	69.48	60.05	31.97	11.22	26.25	26.25
LRWT_f4p0_1984_transcript30343_g1	green	23.26	10.57	10.63	41.63	57.24	24.91	16.9	22.81	24.97	37.62	23.06	37.14	17.58	13.25	13.25
LRWT_f19p0_327_transcript100061_g1	green	30.56	13.68	24	8.91	23.45	26.96	40.52	29.46	36.32	21.9	22.15	43.74	13.07	5.13	5.13
LRWT_f7p0_1507_transcript44765_g2	green	84.52	90.42	78.74	85.59	73.48	105.88	93.26	94.9	86.68	122.83	108.4	88.5	111.54	73.39	73.39
LRWT_f2p0_3131_transcript9817_g1	green	22.93	35.48	25.66	19.15	41.28	40.96	30.27	46.49	26.98	28.99	48.47	29.48	17.25	19.24	19.24
LRWT_f76p0_1272_transcript50473_g1	green	63.9	58.01	56.71	47.31	52.84	67.72	67.4	62.58	66.01	74.13	75.82	75.77	42.46	51.72	51.72
LRWT_f26p0_1578_transcript42798_g1	green	71.97	77.49	78.12	74.77	84.84	80.31	93	91.33	89.98	99.61	86.99	107.36	67.33	64.81	64.81
LRWT_f2p0_1609_transcript42188_g5	green	18.78	11.44	3.87	10.84	30.5	42.35	41.05	30.14	40.31	12.86	31.72	58.77	22.08	15.71	15.71
LRWT_f11p0_1900_transcript32515_g1	green	149.44	137.92	152.02	153.51	165.99	159.01	143.97	135.34	140.77	162.98	152.73	151.35	115.63	99.22	99.22
LRWT_f9p0_2889_transcript14517_g1	green	34.77	14.04	21.34	42.62	44.33	30.57	56.24	44.41	49.19	33.74	51.3	54.91	31.04	49.92	49.92
LRWT_f17p0_438_transcript91193_g1	green	10.99	36.13	5.56	19.22	3.77	20.58	34.63	20.17	22.7	59.23	16.89	29.67	18.87	9.67	9.67
LRWT_f2p0_933_transcript68826_g15	green	181.74	194.84	191.19	184.15	205.17	223.17	212.38	190.18	285.54	216.33	188.64	211.98	152.26	181.97	181.97
LRWT_f12p0_999_transcript63199_g1	green	38.85	40.45	39.72	43.34	45.94	50.37	54.99	64.14	72.5	31.06	36.41	40.95	21.95	30.41	30.41
LRWT_f43p0_1832_transcript32860_g1	green	72.91	67.8	69.48	63.96	76.77	71.02	88.05	82.62	88.08	95.22	89.08	87.29	66.88	63.57	63.57
LRWT_f3p0_908_transcript70196_g8	green	18.01	23.89	36.12	76.18	50.39	52.94	72.46	32.52	51.63	46.95	56.15	59.31	43.91	37.68	37.68
LRWT_f8p0_2247_transcript24869_g1	green	24.38	28.28	18.14	15.59	74.91	0.37	45.54	41.34	69.33	22.27	115.67	66.68	19.52	15.17	15.17
LRWT_f12p0_2239_transcript24617_g1	green	70.53	60.79	82.28	92.81	98.81	96.74	79.23	92.61	112.02	96.86	88.44	88.43	56.62	60.8	60.8
LRWT_f27p0_2617_transcript16995_g1	green	98.54	84.77	95.02	98.89	115.49	116.78	113.71	106.81	125.85	149.41	128.59	136.34	97.19	107.61	107.61
LRWT_f15p0_3505_transcript7879_g1	green	31.29	144.84	23.09	8.8	36.84	54.31	42.05	81.12	44.88	48.83	46	59.88	27.07	47.73	47.73
LRWT_f3p0_1889_transcript33570_g4	green	15.43	9.33	18.08	7.86	39.89	7.96	24.46	25.14	35.69	36.54	19.06	27.28	16.89	9.04	9.04
LRWT_f4p0_1343_transcript51676_g2	green	77.37	79.51	75.93	84.11	95.05	82.13	102.39	118.74	111.37	108.91	91.66	115.01	70.83	84.94	84.94
LRWT_f2p0_993_transcript66003_g5	green	61.74	67.82	65.81	100.2	94.06	105.03	90.54	87.47	79.29	103.47	97.31	99.55	91.01	88.6	88.6
LRWT_f32p0_1578_transcript42243_g3	green	59.51	65.63	67.6	56.67	66.52	67.87	56.78	63.15	78.86	88.6	79.21	82.44	49.22	48.06	48.06
LRWT_f11p0_1187_transcript57511_g2	green	5.97	8.65	14.56	18.1	28.95	15.83	31.75	38.67	27.05	22.8	47.55	29.43	13.16	9.88	9.88
LRWT_f3p0_1215_transcript57276_g7	green	45.85	34.46	23.4	31.27	35.45	30.91	28.44	46.69	57.15	46.32	27.59	43.18	32.31	19.38	19.38
LRWT_f6p0_2274_transcript23538_g1	green	83.3	98.1	88.3	72.75	110.6	103.53	90.8	127.42	95.04	113.74	110.41	91.33	86.47	82.48	82.48
LRWT_f3p0_1764_transcript37541_g9	green	77.13	76.19	75.1	85.72	81.69	91.59	83.91	104.37	108.48	111.72	88.44	100.67	69.45	70.82	70.82
LRWT_f2p0_1866_transcript34017_g8	green	46.23	34.09	28.5	52.27	36.2	40.16	51.64	44.19	43.28	53	60.1	54.62	56.49	24.33	24.33
LRWT_f96p0_1312_transcript51678_g1	green	104.39	106.11	112.8	146.34	115.47	107.55	123.41	142.07	113.17	131.16	114.4	123.42	112.96	101.47	101.47
LRWT_f5p0_2745_transcript16326_g1	green	51	50.33	50.81	42.24	58.38	60.6	69.67	55.16	53.76	65.97	46.21	64.29	35.74	37.74	37.74
LRWT_f3p0_1945_transcript31281_g1	green	42.85	32.59	34.63	38.82	52.4	45.71	48.24	46.8	38.41	52.31	51.51	58.27	32.32	29.35	29.35
LRWT_f2p0_1468_transcript47202_g6	green	9.25	12.88	18.54	30.38	32.15	29.63	37.61	39.03	41.42	34.29	29.3	45.68	38.32	14.33	14.33
LRWT_f22p0_1525_transcript41852_g1	green	135.14	126	119.19	132.38	138.71	148.1	123.74	142.04	129.78	171.5	166.81	171.16	114.32	125.11	125.11
LRWT_f16p0_556_transcript86975_g2	blue	22463.2	16297.7	13994	43299.6	4808.64	15603.4	5139.21	23496.5	7299.4	16716.5	5159.74	10943.6	46.6	5704.39	5704.39
LRWT_f3p0_536_transcript88792_g1	blue	33168.2	33263.4	35492.8	17821	13648.7	18418.1	13654.9	24478.5	23207.2	27617.7	12465.6	14899.1	9041.42	19248.5	19248.5
LRWT_f137p0_507_transcript88352_g1	blue	5984.1	6720.09	8387.15	4513.34	2071.63	3302.1	2962.82	4285.56	2615.12	5921.44	3515.29	3153.78	1960.55	5779.97	5779.97
LRWT_f4p0_1419_transcript46227_g1	blue	10351.3	7746.96	9779.47	5166.63	4212.67	4110.39	6076.2	4801.55	7612.87	4225.28	8471	6479.99	5700.02	6119.87	6119.87
LRWT_f2p0_622_transcript84169_g6	blue	1955.52	4974.51	3549.08	2657.73	4242.55	1125.42	1615.53	3180.03	1519.63	2168.34	2825.23	2121.45	782.7	1255.36	1255.36
LRWT_f10p0_965_transcript65267_g1	blue	2968.07	3053.66	3909.07	2217.19	2811.15	2035.34	2068.33	3432	2780.92	5983.91	3268.13	5251.66	2253.44	3778.03	3778.03
LRWT_f6p0_1305_transcript52964_g5	blue	1267.21	767.1	742.89	408.32	454.64	707.86	785.94	994.15	264.68	1422.13	1470.55	1933.84	101.7	139.37	139.37
LRWT_f6p0_453_transcript92121_g2	blue	3283.36	2889.52	1697.87	277.92	896.14	732.02	352.02	3251.92	261.72	1353.87	690.61	1472.26	625.73	432.71	432.71
LRWT_f5p0_1809_transcript34820_g1	blue	1762.9	431.41	1272.56	1061.72	442.59	1562.87	280.35	149.73	645.81	1316.72	1019.1	1018.06	559.25	833.58	833.58
LRWT_f3p0_1562_transcript43786_g3	blue	754.66	1291.15	2500.33	210.91	1141.54	288.7	1527.35	641.35	1840.29	1551.48	368.3	536.16	477.95	386.66	386.66
LRWT_f3p0_613_transcript84655_g4	blue	1460.54	2081.01	5826.98	1343.29	527.77	832.17	516.25	134.69	471.31	877.22	1129.25	116.83	463.78	293.92	293.92
LRWT_f321p0_1691_transcript35698_g1	blue	1436.47	1558.42	1527.57	684.99	626.12	983.53	1078.27	841.54	1309.18	1612.04	1396.71	1597.76	764.13	1051.31	1051.31
LRWT_f551p0_1580_transcript39865_g1	blue	1115.87	1503.49	1191.18	366.39	582.73	549.4	611.44	652.96	541.84	1224.14	880.4	1143.53	356.97	324.85	324.85
LRWT_f7p0_2146_transcript25781_g1	blue	1608.72	1805.15	1553.81	694.17	578.25	708.87	501.31	473.62	356.63	1371.19	1673.65	1282.1	733.84	706.46	706.46
LRWT_f5p0_1879_transcript33204_g2	blue	720.95	41.53	955.02	0.05	90.27	673.79	933.2	0.07	377.9	240.01	762.2	255.55	5.42	6.18	6.18
LRWT_f2p0_1931_transcript31556_g4	blue	941.82	1003.16	912.43	288.11	560.24	651.75	689.8	805.18	616.22	884.92	1037.04	1085.22	514.08	424.24	424.24
LRWT_f5p0_518_transcript89624_g3	blue	599.07	1295.72	947.35	1002.25	395.49	323.66	378.97	492.07	675.76	952.87	272.83	418.56	368	679.83	679.83
LRWT_f3p0_1932_transcript31901_g2	blue	1068.81	1172.69	981.71	822.05	999.08	1036.61	1124.65	828.97	1064.89	1274.1	1519.78	1488.12	751.37	750	750
LRWT_f2p0_543_transcript88395_g9	blue	964.07	909.58	976.44	288.17	236.96	462.81	778.98	545.28	572.25	504.01	272.06	334.82	602.43	623.73	623.73
LRWT_f176p0_782_transcript73009_g1	blue	1152.49	1881.64	1320.49	1608.54	1286.2	1195.99	1101.18	997.93	941.06	1830.09	1346.58	1471.37	583.02	994.8	994.8
LRWT_f2p0_587_transcript86095_g13	blue	693.31	1209.68	1532.73	240.48	180.43	467.49	187.23	1.85	185.57	827.53	513.51	40.69	373.78	137.38	137.38
LRWT_f36p0_1254_transcript53576_g1	blue	1821.21	1371.15	1611.91	977.54	1286.42	1149.47	1210.51	942.28	919.04	1192.35	1192.01	997.83	940.43	957.32	957.32
LRWT_f2p0_925_transcript68940_g3	blue	201.28	987.48	416.44	73.37	178.27	422.6	456.76	385.23	381.2	66.18	677.19	619.7	56.85	235.86	235.86
LRWT_f5p0_1859_transcript33502_g1	blue	51.68	748.1	584.69	0	334.38	305.43	397.31	562.38	2045.74	563.43	474.54	649.54	63.4	251.86	251.86
LRWT_f36p0_740_transcript75537_g1	blue	827	403.17	993.6	438.89	442.36	188.85	150.16	413.26	924.93	1049.59	406.89	543.18	26.16	248.41	248.41
LRWT_f2p0_1731_transcript37912_g10	blue	788.21	912.62	354.19	275.35	317.26	587.97	170.63	91.49	482.09	910.6	456.37	838.61	474.81	535.9	535.9
LRWT_f156p0_861_transcript69485_g1	blue	833.02	145.66	826.22	738.03	292.75	292.79	662.34	441.63	132.44	941.98	437.55	506.8	577.34	278.99	278.99
LRWT_f3p0_1591_transcript42646_g2	blue	2017.49	1998.94	1637.88	1377.7	1456.04	1431.78	1704.06	1454.25	1431.44	1865.4	1107.79	1810.59	1065.72	1549.47	1549.47
LRWT_f19p0_674_transcript80401_g1	blue	869.53	818.04	645.46	823.19	701.62	109.9	56.08	545.01	184.03	352.11	263.45	185.62	123.34	204.84	204.84
LRWT_f21p0_1354_transcript50401_g1	blue	1654.33	1677.12	1498.14	1053.28	904.47	1206.16	1268.94	1723.77	1009.57	1096.93	1240.31	1195.66	1133.99	1393.24	1393.24
LRWT_f216p0_487_transcript89579_g1	blue	915.56	464.93	1058.23	122.03	149.91	353.68	367.67	470.14	313.7	169.04	195.98	274.17	44.46	120.51	120.51
LRWT_f7p0_932_transcript68607_g1	blue	119.81	655.54	703.52	372.9	795.98	340.56	234.88	600.32	243.85	545.64	631.63	217.13	190.04	309.01	309.01
LRWT_f2p0_1652_transcript40744_g7	blue	906.09	1031.25	428.65	790.37	488.49	440.26	663.61	441.89	276.62	544.32	1017.76	669.45	416.75	584.51	584.51
LRWT_f22p0_1173_transcript56061_g2	blue	1153.54	1106.25	1301.56	598.85	797.81	651.03	859.39	697.73	766.92	584.45	1043.22	905.67	710.09	622.84	622.84
LRWT_f22p0_1597_transcript40593_g1	blue	784.5	1176.92	815.84	832.47	868.69	689.72	328.88	375.7	570.43	1151.87	1008.6	1186.67	894.44	957.2	957.2
LRWT_f9p0_1374_transcript50373_g1	blue	827.41	832.2	651.07	258.12	393.82	346.23	519.07	513.43	420.17	550.69	556.94	550.77	360.22	317.2	317.2
LRWT_f3p0_877_transcript70668_g2	blue	486.84	322.2	437.31	154.46	219.32	229.41	226.33	413.68	271.24	429.09	460.07	475.26	185.9	133.63	133.63
LRWT_f3p0_1027_transcript64485_g3	blue	635.05	1016.4	825.59	763.17	474.74	615.51	468.9	603.94	207.51	433.81	1096.58	701.7	467.98	510.5	510.5
LRWT_f7p0_1180_transcript58389_g4	blue	1053.92	771.47	983.3	214.5	188.22	269.25	332.67	646.64	247.24	267.86	347.18	293.06	410.03	566.96	566.96
LRWT_f19p0_644_transcript82224_g1	blue	766.97	727.23	468.26	703.57	885.01	230.03	130.87	611.41	227.76	260.9	349.85	302.22	251.37	172.58	172.58
LRWT_f3p0_646_transcript82814_g3	blue	969.34	880.48	1174.49	707.88	490.36	804.57	275	495.54	245.25	710.58	586.29	714.62	296.49	457.79	457.79
LRWT_f7p0_638_transcript82201_g1	blue	578.02	891.51	954.77	136.28	142.45	342.62	157.01	13.21	116.33	440.37	434.64	37.1	207.46	68.36	68.36
LRWT_f84p0_1840_transcript31865_g1	blue	1004.11	905.27	866.78	233.23	343.94	356.19	332.43	302.39	200.58	897.55	876.93	766.64	257.52	227.41	227.41
LRWT_f9p0_1956_transcript29704_g1	blue	804.72	679.71	706.36	208.33	306.23	393.48	512.57	402.53	429.05	498.35	538.79	499.53	301.62	315.37	315.37
LRWT_f2p0_820_transcript73848_g7	blue	341.29	293.97	501.67	270.12	249.84	100.32	200.22	228.24	94.69	80.61	439.41	360.46	77.08	196.84	196.84
LRWT_f5p0_712_transcript79069_g3	blue	722.22	942.99	794.75	665.58	460.39	253.06	212.84	480.84	529.2	355.81	418.48	236.6	349.34	417.74	417.74
LRWT_f6p0_1450_transcript46549_g1	blue	335.45	389.11	160.58	156.19	518.25	85.6	54.08	493.97	95.26	318.31	304.37	101.89	292.29	207.9	207.9
LRWT_f2p0_460_transcript92963_g7	blue	134.73	810.24	351.23	323.77	697.87	87.04	163.89	575.76	52.2	99.67	338.45	100.99	62.73	172.9	172.9
LRWT_f9p0_815_transcript72900_g1	blue	605.92	269.56	721.35	51.7	149.73	97.63	154.02	264.17	314.15	281.07	352.68	691.47	105.15	159.36	159.36
LRWT_f88p0_782_transcript71067_g1	blue	283.82	791.54	704.44	261.76	212.09	354.27	320.97	429.43	461.27	226.63	574.92	224.52	546.96	163.94	163.94
LRWT_f14p0_1458_transcript45210_g1	blue	502.28	506.84	461.81	291.75	305.34	445.13	272.14	409.53	399.04	550.5	615.92	291.99	382.1	233.44	233.44
LRWT_f7p0_1958_transcript27940_g1	blue	659.79	830.7	710.86	326.91	451.32	461.97	570.96	540.96	485.02	499.76	372.16	564.11	349.99	380.16	380.16
LRWT_f71p0_1710_transcript36954_g1	blue	598.5	444.72	248.04	141.92	264.63	122.15	309.69	350.23	173.73	126.4	268.27	246.46	132.08	117.8	117.8
LRWT_f17p0_860_transcript70526_g1	blue	830.66	677.91	996.74	404.59	430.5	195.85	75.01	126.81	161.55	101.49	460.07	178.29	79.65	96.35	96.35
LRWT_f12p0_1813_transcript34846_g2	blue	490.74	579.5	364.4	322.59	348.32	251.22	270.9	228.08	412.71	459.63	359.99	386	194.94	216.79	216.79
LRWT_f2p0_1628_transcript41510_g5	blue	545.46	462.72	573.3	357.81	532.14	443.33	634.8	399.76	344.05	572.3	778.43	787.49	496.41	341.74	341.74
LRWT_f4p0_962_transcript67358_g4	blue	1148.83	1055.38	1085.7	777.59	829.72	959.03	900.05	917.05	856.49	1061.09	990.46	910.89	785.63	1031.21	1031.21
LRWT_f4p0_545_transcript85511_g2	blue	485.46	573.68	364.22	257.6	159.2	166.21	191.35	369.06	382.31	370.54	188.63	184.47	128.25	286.44	286.44
LRWT_f5p0_1438_transcript47820_g1	blue	693.75	643.85	605.94	212.76	216.35	147.06	323.5	310.26	199.94	240.22	398.15	354.57	447.61	306.18	306.18
LRWT_f6p0_524_transcript89016_g3	blue	894.24	1069.54	742.54	728.1	660.16	626.91	526.16	694.17	523.37	903.4	781.66	634.73	572.77	787.49	787.49
LRWT_f2p0_1852_transcript34180_g3	blue	253.75	465.58	723.63	230.69	283.9	487.66	527.1	376.8	54.55	963.54	232.16	215.91	830.63	266.53	266.53
LRWT_f4p0_772_transcript76274_g2	blue	225.03	186.38	338.09	133.68	32.86	118.86	9.77	49.96	0	470.09	85.49	133.12	102.51	285.84	285.84
LRWT_f4p0_571_transcript86737_g5	blue	305.49	603.62	731.5	142.76	114.28	83.35	69.42	72.4	42.55	432.9	229.6	556.39	224.5	50.97	50.97
LRWT_f11p0_1790_transcript34717_g1	blue	600.8	522	596.03	346.91	541.91	407.9	488.29	447.91	399.37	455.7	613.2	517.55	612.39	345.92	345.92
LRWT_f3p0_3471_transcript8173_g1	blue	370.32	269.51	145.29	129.98	269.56	306.21	167.33	233.48	416.01	332.31	430.85	206.35	153.7	47.98	47.98
LRWT_f5p0_1413_transcript49062_g5	blue	28.77	3052.06	48.36	1248.49	385.53	437.27	34.95	1311.94	90.45	3067.04	116.84	1533.32	69.63	32.17	32.17
LRWT_f3p0_1068_transcript62906_g14	blue	884.88	973.59	802.04	463.41	341.76	455.18	439.52	407.05	378.75	553.67	506.04	538.05	589.05	576.14	576.14
LRWT_f66p0_485_transcript86138_g1	blue	1179.09	1091.66	954.67	239.62	248.63	232.66	387.61	479.66	316.43	438.28	429.09	501.54	398.79	324.68	324.68
LRWT_f2p0_1652_transcript40872_g8	blue	545.82	422.29	339.94	504.48	557.23	369.23	542.19	549.17	388.8	605.42	374.38	714.63	299.94	380.75	380.75
LRWT_f5p0_1708_transcript38862_g3	blue	278.41	542.75	316.72	102.5	102.24	99.31	245.77	339.39	79.68	310.09	350.87	194.05	276.16	166.03	166.03
LRWT_f8p0_991_transcript65856_g3	blue	1095.05	1095.64	1173.71	847.56	883.63	1064.69	996.66	948.43	597.77	1096.21	1011.25	985.09	944.71	949.77	949.77
LRWT_f4p0_987_transcript65191_g2	blue	270.98	232.71	157.65	233.46	172.64	229.03	307.06	144.41	192.72	87.39	414.91	366.89	41.95	82.35	82.35
LRWT_f11p0_742_transcript75062_g1	blue	678.58	702.84	707.42	478.49	466.98	432.73	536.85	509.57	581.85	553.06	639.03	587.8	588.02	665.87	665.87
LRWT_f21p0_1406_transcript48266_g1	blue	787.23	649.4	715.18	662	647.86	639.06	712.97	591.16	557.33	725.21	836.61	760.32	556.13	403.42	403.42
LRWT_f18p0_791_transcript75115_g1	blue	258.93	111.72	507.26	222.19	155.94	59.52	189.9	149.76	103.44	62.79	529	374.68	43.66	79.6	79.6
LRWT_f26p0_1338_transcript49814_g1	blue	294.86	270.38	326.94	359.53	351.36	273.41	232.28	166.99	188.12	344.1	345.6	322.26	179.26	183.91	183.91
LRWT_f19p0_1788_transcript34167_g1	blue	472.87	412.25	455.97	313.01	395.22	363.31	377.55	420.6	483.12	486.88	521.27	570.78	219.39	236.09	236.09
LRWT_f155p0_378_transcript95164_g1	blue	493.94	297.91	618.24	121.46	93.73	234.92	184.41	114.72	77.61	143.89	191.2	113.93	168.81	270.95	270.95
LRWT_f2p0_300_transcript101952_g5	blue	401.15	499.73	207.15	107.72	220.32	143	75.42	355.56	353.83	306.37	151.35	79.7	114.28	177.71	177.71
LRWT_f2p0_2464_transcript21188_g4	blue	539.94	490.51	622.98	433.84	420.68	375.9	453.94	373.6	434.31	633.13	673.24	658.99	323.58	544.39	544.39
LRWT_f9p0_1398_transcript49557_g1	blue	196.76	486.96	361.51	128.07	146.83	138.8	172.88	216.53	111.31	285.58	295.92	441.63	165.52	234.02	234.02
LRWT_f2p0_996_transcript66184_g17	blue	446.79	586.25	213.82	127.56	150.85	137.61	120.78	230.23	206.69	386.1	376.26	335.51	163.01	161.68	161.68
LRWT_f37p0_565_transcript82286_g1	blue	492.7	473.45	482.18	199.58	174.74	162.4	250.3	251.72	152.93	192.91	249.18	204.97	265.19	317.91	317.91
LRWT_f21p0_744_transcript76777_g2	blue	612.67	664.49	607.96	542.38	414.41	346.92	355.03	393.22	347.14	371.3	537.41	469.81	509.08	379.39	379.39
LRWT_f68p0_1547_transcript40952_g1	blue	429.02	430.91	449.34	406.31	390.8	421.46	340.2	325.9	418.37	506.67	491.08	485.49	301.93	341.9	341.9
LRWT_f3p0_872_transcript70827_g1	blue	89.28	604.92	408.47	121.91	221.8	145.44	245.21	214.3	83.62	254.47	187.7	305.02	136.96	88.35	88.35
LRWT_f4p0_1478_transcript46834_g3	blue	398.94	154.49	411.92	36.95	92.55	235.85	157.61	270.89	134.35	178.56	133.36	295.26	113.14	87.82	87.82
LRWT_f6p0_1209_transcript56707_g2	blue	320.21	738.64	460.88	299.11	279.87	285.53	324.31	219.04	262.51	360.28	284.05	412.75	125.66	214.42	214.42
LRWT_f3p0_1857_transcript33889_g4	blue	242.13	190.83	184.83	44.82	103.7	83.1	178.14	97.87	173.26	177.1	97.24	179.69	41.93	38.16	38.16
LRWT_f14p0_566_transcript86217_g1	blue	370.94	216.15	547.28	96.08	114.19	68.33	102.35	27.28	81.06	26.49	177.07	29.41	263.66	169.51	169.51
LRWT_f137p0_674_transcript76062_g1	blue	435.86	455.19	418.42	299.17	276.21	221.61	416.34	152.96	340.49	333.76	189.25	279.83	261.41	218.17	218.17
LRWT_f16p0_523_transcript88427_g2	blue	371.11	184.72	168	317.85	131.33	123.98	257.03	47.38	199.87	399.66	462.8	518.19	140.04	179.64	179.64
LRWT_f4p0_1335_transcript51737_g3	blue	281.79	263.3	315.96	191.47	222.46	283.39	144.8	158.9	184.13	354.22	296.98	262.03	199.46	162.16	162.16
LRWT_f8p0_453_transcript92860_g1	blue	310.45	232.58	214.22	230.83	165.03	66.9	53.33	87.78	77.92	125.9	199.55	95.58	182.99	154.44	154.44
LRWT_f127p0_1225_transcript53105_g1	blue	456.64	405.67	325.66	150.88	200.22	174.1	267.34	374.71	332.02	232.31	257.86	211.14	231.37	257.83	257.83
LRWT_f4p0_381_transcript95737_g2	blue	171.5	436.81	400.56	129.43	228.22	279.12	25.23	265.93	149.08	135.62	206.47	126.98	39.55	124.47	124.47
LRWT_f73p0_1268_transcript51698_g1	blue	422.3	345.86	373.25	235.72	221.48	204.32	178.95	276.08	157.63	514.05	430.92	457.14	203.1	198.87	198.87
LRWT_f2p0_1663_transcript40311_g6	blue	416.39	220.12	401.49	97.94	193.08	244.37	239.57	292.63	309.96	218.02	235.15	345.22	94.81	179.08	179.08
LRWT_f8p0_1818_transcript34400_g2	blue	163.32	204.97	121.53	78.06	105.1	233.68	45.79	34.68	135.49	165.17	102.17	132.72	107.76	38.35	38.35
LRWT_f7p0_966_transcript66419_g3	blue	889.8	1021.57	806.85	704.34	658.51	659.44	674.88	828.21	796.86	908.45	913.61	853	834.49	876.75	876.75
LRWT_f3p0_793_transcript73667_g1	blue	295.62	330.89	228.77	275.14	157.41	154.3	150.27	203.55	211.63	97.72	94.04	226.3	113.22	148.22	148.22
LRWT_f13p0_616_transcript83863_g1	blue	264.96	292.57	254.36	65.7	163.76	97.32	94.68	41.15	125.71	181.99	223.9	178.45	71.99	117.96	117.96
LRWT_f3p0_1359_transcript51318_g4	blue	316.82	301.92	296.81	132.98	135.79	176.57	145.76	101.01	147.49	345.59	269.16	279.71	90.66	94.13	94.13
LRWT_f3p0_2035_transcript29205_g2	blue	235.87	368.42	224.06	100.74	189.39	70.15	67.04	114.64	123.32	267.27	175.5	156.71	116.53	166.39	166.39
LRWT_f394p0_2926_transcript10928_g1	blue	521.45	412.74	394	78.14	53.15	103.85	43.81	118.31	107.23	192.35	123.41	158.22	49.57	89.55	89.55
LRWT_f23p0_1080_transcript59827_g1	blue	177.33	212.64	274.22	127.03	206.76	148.36	97.46	165.16	137.16	326.78	161.73	237.68	64.05	69.16	69.16
LRWT_f5p0_1948_transcript31487_g2	blue	185.98	75.99	136.07	106.78	116.36	67.89	89.73	80.7	28.3	163.06	247.81	85.21	32.43	22.2	22.2
LRWT_f3p0_2730_transcript17063_g3	blue	376.03	305.43	395.42	347.24	283.55	293.13	275.96	298.47	336.11	443.57	547.42	459.25	333.72	225.74	225.74
LRWT_f4p0_1257_transcript55364_g4	blue	246.27	204.53	321.21	95.17	101.67	120.89	165.47	114.22	122.66	139.72	151.66	131.54	222.34	206.06	206.06
LRWT_f2p0_1953_transcript31331_g4	blue	507.52	576.17	573.01	462.59	438.95	693.46	455.83	308.36	535.14	558.03	581.75	488.9	270.73	445.28	445.28
LRWT_f3p0_1779_transcript36828_g7	blue	622.94	695.99	622.99	238.71	252.23	281.51	301.41	245.58	170.75	339.28	468.81	388.05	295.02	264.29	264.29
LRWT_f3p0_1344_transcript51617_g1	blue	278.78	270.05	218.54	109.21	160.44	196.28	97.15	168.75	77.78	159.74	193.9	110.41	109.53	136.07	136.07
LRWT_f422p0_957_transcript64394_g1	blue	247.18	236.39	198.88	193.66	219.38	217.99	193.16	155.54	129.26	256.44	272.11	256.2	147.41	94.54	94.54
LRWT_f3p0_1952_transcript31397_g1	blue	341.88	116.5	85.99	150.31	97.62	164.43	95.96	439.18	151.46	232.76	177.39	270.35	199.67	110.62	110.62
LRWT_f73p0_1509_transcript42237_g1	blue	328.4	326.48	309.68	202.41	213.66	215.36	300.49	310.06	249.88	200.36	294.63	308.71	244.94	234.59	234.59
LRWT_f2p0_1801_transcript35197_g3	blue	155.14	189.87	308.76	59.42	97.68	55.06	76.91	272.02	111.15	407.75	90.9	280.75	107.78	73.16	73.16
LRWT_f5p0_1437_transcript47726_g4	blue	187.48	228.6	268.98	63.47	73.47	94.69	138.45	141.24	109.06	175.02	166.56	209.06	68.8	91.36	91.36
LRWT_f6p0_1527_transcript44956_g2	blue	371.97	356.28	273.31	183.45	181.27	141.81	230.03	317.91	103.54	246.71	269.84	298.69	199.17	191.51	191.51
LRWT_f18p0_670_transcript80828_g1	blue	421.11	691.98	474.95	314.72	177.83	180.71	87.96	255.92	224.2	195.97	222.29	152.47	103.09	239.96	239.96
LRWT_f2p0_790_transcript75402_g9	blue	275.86	238.88	342.18	142.96	103.94	119.49	125.79	83.25	94.01	104.49	168.33	150.08	177.89	241.39	241.39
LRWT_f6p0_793_transcript74959_g2	blue	320.65	236.89	382.96	199.97	136.18	215.52	150.44	152.26	108.51	319.47	219.25	229.86	154.68	189.46	189.46
LRWT_f2p0_1025_transcript64682_g6	blue	275.32	185	213.7	144.09	316.46	158.36	120.19	129.87	182.11	547.93	186.07	382.6	201.75	246.83	246.83
LRWT_f4p0_1369_transcript48108_g1	blue	275.86	213.24	238.26	161.02	192.52	118.38	200.33	131.55	56.25	122.11	210.99	167.13	192.28	102.2	102.2
LRWT_f5p0_1338_transcript51712_g3	blue	31.19	240.03	110.18	160.54	54.32	78.15	107.01	5.48	18.06	171.13	102.33	201.4	75.82	33.49	33.49
LRWT_f4p0_546_transcript88198_g6	blue	150.34	183.42	128.08	51.33	34.34	85.4	61.15	33.95	83.46	203.26	185.59	168.9	88.47	160.33	160.33
LRWT_f9p0_1346_transcript51234_g2	blue	115.06	99.3	217.27	96.78	83.21	103.79	57.37	53.07	44.3	215.24	175.26	168.04	153.18	108.63	108.63
LRWT_f29p0_1511_transcript44705_g1	blue	197.39	206.43	202.01	132.2	152.93	105.63	121.99	210.61	108.85	167.05	198.27	153.32	129.4	101.15	101.15
LRWT_f104p0_1279_transcript52481_g1	blue	251.32	397.63	201.46	324.6	255.22	165.48	223.58	249.08	184.41	339.67	264.63	295.41	205.22	220.28	220.28
LRWT_f3p0_581_transcript86342_g1	blue	373.38	405.57	252.36	201.13	34.05	79.76	65.87	56.29	34.9	86.39	123.45	66.19	158.15	57.3	57.3
LRWT_f35p0_1871_transcript31246_g1	blue	380.67	88.47	72.92	10.8	143.91	45.83	141.44	166.56	163.71	374.31	81.94	458.06	116.3	78.74	78.74
LRWT_f27p0_988_transcript65031_g2	blue	248.69	286.76	276.53	167.89	146.31	156.43	173.95	136.07	118.12	264.8	364.42	232.11	226.93	188.84	188.84
LRWT_f5p0_1051_transcript62659_g2	blue	729.55	783.68	668.68	213.35	365.47	414.1	363.15	473.34	334.97	507.34	348.1	322.33	370.89	347.82	347.82
LRWT_f13p0_778_transcript74074_g1	blue	263.48	301.93	254.25	123.43	114.24	93.25	136.79	99.86	104.6	174.32	229.16	193.9	187.78	157.37	157.37
LRWT_f5p0_5039_transcript1445_g1	blue	189.92	120.35	154.32	43.64	111.27	106.69	133.51	105.29	158.11	167.37	165.08	189.19	75.36	77.75	77.75
LRWT_f4p0_649_transcript82385_g8	blue	283.94	367.17	307.64	218.41	178.9	209.72	220.56	178.3	159.53	236.2	269.86	276.31	282.23	211.56	211.56
LRWT_f3p0_1240_transcript55989_g4	blue	247.39	326.78	342.15	195.14	198.96	216.01	220.27	258.69	169.75	411.03	154.41	228.4	288.42	270.58	270.58
LRWT_f2p0_2079_transcript27161_g2	blue	473.92	162.98	272.63	44.78	35.45	32.85	56.8	63.11	59.18	218.34	176.62	123.3	110.76	82.57	82.57
LRWT_f2p0_1395_transcript49905_g7	blue	342.76	132.27	315.33	123.18	192.65	56.3	81.42	162.11	155.52	104.6	62.8	176.13	84.47	135.63	135.63
LRWT_f10p0_1205_transcript56893_g2	blue	74.16	221.39	186.39	193.76	94.33	100.87	99.37	61.7	31.56	469.49	101.9	515.38	56.71	137.98	137.98
LRWT_f2p0_1115_transcript61024_g8	blue	3.62	121.29	41.75	1.33	3.65	48.81	33	178.32	54.71	0.71	144.25	156.21	122.89	2.12	2.12
LRWT_f8p0_1745_transcript37149_g4	blue	368.66	458.49	366.69	265.45	371.8	329.62	393.9	365.96	379.49	407.99	474.29	464.11	306.66	293.5	293.5
LRWT_f53p0_927_transcript66966_g1	blue	199.37	478.74	278.73	147.14	115.24	160.37	172.31	124.03	98.9	337	165.95	329.28	91.8	135.97	135.97
LRWT_f9p0_1266_transcript54416_g1	blue	84.23	68.15	318.12	37.73	79.64	29.73	415.29	26.35	586.55	28.22	139.12	76.47	93.13	38.85	38.85
LRWT_f3p0_1856_transcript34077_g3	blue	157.62	149.27	146.56	98.05	111.05	101.13	125.35	79.3	107.36	168.16	155.98	171.71	65.06	61.03	61.03
LRWT_f20p0_1206_transcript55605_g2	blue	148.82	96.36	237.72	101.61	169.76	99.78	96.09	80	59.63	153.76	139.78	198.93	140.93	96.38	96.38
LRWT_f2p0_2569_transcript19523_g5	blue	204.83	69.32	249.24	107.18	125.77	74.61	97.56	177.82	103.39	215.16	200.51	122.63	90.35	37.97	37.97
LRWT_f3p0_1357_transcript51301_g3	blue	207.61	190.59	213.52	182.92	204.15	226.9	148.83	138.03	211.1	324.8	269.9	280.83	132.94	166.38	166.38
LRWT_f5p0_1082_transcript62128_g2	blue	148.84	125.14	133.76	143.04	126.08	128.74	77.78	91.06	137.53	187.34	171.76	169.21	83.56	88.41	88.41
LRWT_f62p0_1743_transcript34006_g1	blue	140.25	144.72	145.71	30.48	24.91	26.27	45.06	60.31	44.68	64.67	84.83	82.22	82.48	91.15	91.15
LRWT_f4p0_1228_transcript56276_g5	blue	209.58	157.05	293.58	43.75	69.52	34.11	96.67	83.47	76.48	85.59	204.01	145.1	59.6	102.2	102.2
LRWT_f9p0_576_transcript86333_g1	blue	153.88	194.86	152.25	116.84	106.8	64.88	54.41	59.52	34.76	77.7	146.01	108.58	121.05	109.62	109.62
LRWT_f15p0_1735_transcript36942_g1	blue	165.96	181.22	154.42	78.44	105.94	94.09	77.64	98.26	69.3	188.21	166.75	170.45	71.59	62.81	62.81
LRWT_f6p0_971_transcript66777_g2	blue	280.66	329.13	313.56	244.02	238.43	297.87	254.43	223.76	251.99	293.72	346.44	326.61	249.24	308.19	308.19
LRWT_f3p0_2029_transcript29541_g1	blue	250.43	242.09	241.45	46.07	80.69	66.32	100.16	71.54	71.39	204.31	221.91	256.64	41.63	49.18	49.18
LRWT_f2p0_1197_transcript57804_g9	blue	145.68	3.09	63.83	2.06	2.04	24.61	142.3	48.54	2.3	2.3	60.08	72.71	1.91	36.56	36.56
LRWT_f4p0_1855_transcript34055_g6	blue	99.92	87.82	114.28	62.76	81.98	31.36	41.18	50.19	87.56	347.24	77.49	139.85	24.22	43.53	43.53
LRWT_f10p0_633_transcript82742_g4	blue	220.77	206.29	187.88	176.72	145.73	143.45	117.48	101.19	70.98	179.29	154.91	153.66	138	100.39	100.39
LRWT_f3p0_2077_transcript28428_g3	blue	228.39	205.14	219.98	198.21	202.13	199.14	184.79	161.28	165.64	243.54	259.34	244.6	144.57	117.62	117.62
LRWT_f5p0_1032_transcript64348_g5	blue	97.21	149.82	125.69	69.25	114.48	73.06	180.61	106.6	112.14	139.88	100.72	129.7	71.44	68.62	68.62
LRWT_f5p0_1024_transcript63827_g2	blue	103.97	81.81	78.46	89.46	50.8	36.86	33.67	85.45	70.77	107.49	137.01	56.31	15.97	34.29	34.29
LRWT_f31p0_651_transcript80214_g1	blue	337.71	319.75	349.37	193.73	197.16	222.33	219.89	212.48	227.46	178.02	240.37	196.16	275.46	260.45	260.45
LRWT_f2p0_1787_transcript36135_g6	blue	208.16	192.12	162.18	67.39	104.91	92.02	163.18	226.3	144.02	127.3	130.25	152.5	100.13	94.51	94.51
LRWT_f37p0_650_transcript81192_g1	blue	176.7	231.41	266.45	105	168.57	117.69	107.23	139.08	120.79	127.57	158.33	124.9	191.25	158.42	158.42
LRWT_f3p0_1907_transcript32602_g8	blue	116.44	108.59	108.79	23.07	47.92	52.01	101.85	60.84	52.9	56.62	63.98	77.66	18.21	23.79	23.79
LRWT_f2p0_2587_transcript19465_g2	blue	216.08	207.58	188.56	107.44	126.19	107.25	145.24	140.03	122.13	179.03	201.7	166.32	127.5	96.71	96.71
LRWT_f3p0_2651_transcript18178_g1	blue	150.79	92.8	68.23	56.48	91.83	93.09	102.69	77.04	80.5	147.87	152.94	186.68	47.27	59.17	59.17
LRWT_f2p0_1406_transcript49403_g3	blue	164.05	145.71	157.42	76.66	97.9	84.27	85.6	75.86	75.47	236.81	183.32	262.86	56.96	53	53
LRWT_f93p0_943_transcript66646_g1	blue	111.53	99.72	124.8	84.17	93.79	73.95	145.03	61.15	41.69	76.59	58.86	9.95	25.18	34.61	34.61
LRWT_f51p0_617_transcript83378_g1	blue	106.89	132.57	107.66	121.86	116.5	64.86	57.47	54.01	36.12	37.59	126.39	63.04	150.41	75.53	75.53
LRWT_f5p0_1830_transcript34814_g1	blue	548.92	550.83	551.82	384.41	403.38	441.12	448.94	427.4	419.2	432.47	524.63	490.4	411.2	400.38	400.38
LRWT_f3p0_1640_transcript40941_g1	blue	460.9	426.62	393.41	394.81	405.08	382.65	324.1	402.38	370.62	588.89	475.89	532.12	371.12	344.39	344.39
LRWT_f5p0_3260_transcript10319_g1	blue	251.12	271.95	272.77	188.41	205.97	237.75	177.45	258.38	234.32	251.55	204.6	273.16	308.3	233.74	233.74
LRWT_f28p0_1125_transcript57253_g1	blue	189.15	162.44	151.6	29.08	38.59	40.13	60.31	90.77	107.62	92.46	85.1	76	31.59	47.35	47.35
LRWT_f3p0_610_transcript84801_g4	blue	227.17	232.57	11.48	35.18	61.58	42.33	52.16	44.92	5.22	112.35	82.89	7.92	13.92	10.75	10.75
LRWT_f3p0_1291_transcript53650_g2	blue	457.86	537.86	469.02	101.44	139.28	190.45	98.53	142.79	82.9	157.64	170.85	138.18	117.29	121.09	121.09
LRWT_f5p0_1124_transcript59014_g1	blue	173.73	294.21	230.12	207.33	170.84	212.68	166.19	168.55	172.32	352.33	235.24	342.25	195.9	204.09	204.09
LRWT_f4p0_1734_transcript36744_g3	blue	85.76	44.08	49.73	26.49	34.67	21.68	79.77	47.56	69.05	78.91	91.89	78.31	9.51	11.34	11.34
LRWT_f4p0_1660_transcript39697_g4	blue	128.61	129.53	123.01	19.72	32.76	34.84	94.9	69.28	36.31	66.51	74.67	63.51	49.12	27.61	27.61
LRWT_f2p0_1092_transcript61908_g15	blue	68.9	112.11	147.44	129.15	80.87	111.62	46.19	68.88	148.56	269.47	61.89	76.82	25.13	56.84	56.84
LRWT_f2p0_1111_transcript61001_g4	blue	200.26	158.49	204.37	165.45	138.71	115.14	116.64	64.99	86.13	54.69	121.65	53.38	138.43	100.75	100.75
LRWT_f3p0_1804_transcript36304_g8	blue	204.06	54.51	35.17	60.37	78.31	76.57	44.63	86.2	75	113.75	135.59	77.88	40.81	32.01	32.01
LRWT_f103p0_1177_transcript53004_g1	blue	203.63	142.28	120.85	43.24	62.29	58.3	64.9	113.91	117.87	137.02	106.66	112.69	57.27	103.19	103.19
LRWT_f56p0_1528_transcript42891_g1	blue	311.84	317.15	309.06	227.53	257.15	229.81	225.87	237.61	215.96	369.82	375.15	403	193.51	207.39	207.39
LRWT_f12p0_1268_transcript51214_g1	blue	400.62	9.73	415.68	53.53	326.84	24.09	26	334.43	49	30.68	37.94	60.89	67.67	61.09	61.09
LRWT_f7p0_1922_transcript31504_g1	blue	19.72	202.93	94.76	86.86	125.17	56.85	32.82	76.22	62.88	56.35	42.42	135.11	55.26	23.03	23.03
LRWT_f3p0_1711_transcript39182_g8	blue	188.7	201.37	196.25	208.14	178.44	153.21	140.34	131.21	94.75	123.79	183.17	151.48	173.67	109.81	109.81
LRWT_f3p0_926_transcript68506_g1	blue	148.2	153.36	136.65	76.53	68.01	82.27	91.13	93.26	83.34	149.39	121.99	119.59	100.14	157.99	157.99
LRWT_f44p0_946_transcript66906_g1	blue	240.9	204.5	212.46	95.15	105.79	119.18	141.98	45.66	77.46	124.14	90.31	77.81	40.85	65.39	65.39
LRWT_f2p0_1262_transcript55163_g8	blue	306.58	222.98	265.32	80.08	60.89	42.87	92.15	68.69	65.5	80.93	110.64	83.04	116.92	49.3	49.3
LRWT_f3p0_361_transcript98536_g5	blue	76.45	101.27	85.42	74.68	43.08	30.31	44.99	60.54	0.9	48.77	26.95	39.6	77.58	7.93	7.93
LRWT_f3p0_1778_transcript36488_g2	blue	510.38	507.07	595.8	452.63	466.32	521.88	528.26	512.85	528.54	483.17	582.91	547.24	530.43	449.97	449.97
LRWT_f30p0_2236_transcript22352_g1	blue	229.75	165.14	168.64	122.02	180.75	143.52	66.21	101.75	127.1	454.83	315.15	437.33	68.29	151.12	151.12
LRWT_f3p0_648_transcript79224_g1	blue	343.72	391.75	357.2	157.26	201	177.83	177.76	226.1	195.01	198.01	207.28	185.56	231.43	244.57	244.57
LRWT_f17p0_1559_transcript42419_g1	blue	169.88	198	175.1	45.81	42.17	43.66	50.74	50.09	51	137.15	132.06	114.35	50.12	73.1	73.1
LRWT_f55p0_473_transcript91484_g1	blue	156.17	156.58	244.94	65.52	82.69	203.93	175.1	58.4	82.64	62.76	118.87	53.4	137.05	64.83	64.83
LRWT_f2p0_991_transcript66049_g5	blue	248.53	270.53	191.25	197.61	200.1	173.26	136.48	214.24	185.76	233.04	234.05	232.54	172.41	168.39	168.39
LRWT_f3p0_3057_transcript12789_g1	blue	187.07	181.79	194.52	171.63	122.09	169.17	137.77	155.24	93.07	156.42	151.2	126.5	70.53	28.9	28.9
LRWT_f22p0_518_transcript86712_g1	blue	372.52	354.48	378.74	140.09	144.4	129.71	147.92	133.29	98.04	193.45	256.02	187.96	182.63	162.38	162.38
LRWT_f2p0_563_transcript87435_g16	blue	91.96	122.57	106.55	61.09	34.41	36.19	39.41	39.49	31.48	56.35	88.53	64.96	94.32	93.8	93.8
LRWT_f6p0_1908_transcript32498_g4	blue	160.7	91.98	93.64	20.26	25.75	38.91	83.75	69.82	35.01	64.78	93.46	81.1	40.26	33.51	33.51
LRWT_f15p0_1493_transcript46043_g1	blue	193.62	125.39	90.27	125.42	97.05	136.34	84.36	94.65	187.56	138.06	92.67	130.05	56.45	86.6	86.6
LRWT_f3p0_2384_transcript22557_g2	blue	134.26	194.77	68.25	40.31	37.33	56.68	75.31	57.75	41.84	99.15	111.74	108.94	65.65	31.19	31.19
LRWT_f3p0_1794_transcript36015_g4	blue	164.93	222.29	156.72	72.56	81.3	86.4	110.57	78.16	82.78	106.23	109.31	106.79	139.9	71.36	71.36
LRWT_f16p0_1420_transcript46617_g1	blue	169.87	161.84	151.84	70.84	94.72	89.33	119.12	87.32	117.34	132.26	148.25	134.78	84.62	93.12	93.12
LRWT_f7p0_1322_transcript50222_g1	blue	128.3	145.48	152.74	75.35	58.75	62.39	70	79.58	57.38	143.2	90.99	78.59	97.65	118.68	118.68
LRWT_f2p0_1323_transcript52718_g10	blue	208.18	9.57	179.44	27.41	128.98	40	47.47	137.1	87.75	21.53	61.11	90.15	19.92	46.74	46.74
LRWT_f97p0_1120_transcript59482_g1	blue	274.58	323.52	396.57	218.28	186.24	193.71	186.44	133.19	137.25	276.49	228.5	242.25	213.75	200.45	200.45
LRWT_f3p0_1045_transcript64934_g9	blue	239.2	272.57	233.53	116.78	95.27	136.99	188.04	157.16	113.05	176.33	151.14	127.42	148.83	139.66	139.66
LRWT_f211p0_1025_transcript61780_g1	blue	320.92	369.72	246.63	123.18	145.46	168.2	204.85	223.81	185.03	141.52	159.81	187.2	183.57	192.47	192.47
LRWT_f3p0_1567_transcript43292_g1	blue	369.54	365.81	350.21	231.93	222.79	226.51	271.6	211.32	244.85	212.12	301.36	272.21	296.82	241.83	241.83
LRWT_f8p0_1962_transcript29927_g1	blue	360.42	338.95	342.76	306.37	333.21	300.52	339.05	310.53	332.3	437.46	514.85	428.2	275.83	290.73	290.73
LRWT_f7p0_1171_transcript57027_g1	blue	193.06	211.5	194.02	116.97	125.18	121.43	236.88	185.78	183.17	207.29	150	119.71	166.98	147.17	147.17
LRWT_f2p0_1433_transcript47548_g1	blue	226.98	68.02	711.74	12.15	84.18	11.95	332.45	25.17	610.58	43.08	41.05	36.73	40.07	21.56	21.56
LRWT_f13p0_1865_transcript33501_g2	blue	167.4	212.77	86.2	106.71	84.76	111.57	129.76	92.81	113.13	142.95	160.56	91.58	150.46	82.9	82.9
LRWT_f2p0_740_transcript77989_g13	blue	328.48	363.89	220.98	100.58	97.32	122.02	111.89	114.9	95.16	141.41	138.16	120.19	127.36	183.42	183.42
LRWT_f3p0_1918_transcript32366_g2	blue	206.45	78.88	185.15	62.3	105.45	39.11	43.97	81.04	91	48.36	102.68	116.92	42.38	58.41	58.41
LRWT_f2p0_2793_transcript16235_g3	blue	95.09	63.52	92.19	52.51	51.36	95.83	23.46	57.09	94.77	124.59	109.81	100.14	65.8	62.07	62.07
LRWT_f2p0_1707_transcript38795_g4	blue	166.73	111.64	85.68	86.53	65.24	44.71	72.12	36.84	98.18	112.04	104.87	115.47	35.64	43.73	43.73
LRWT_f18p0_1457_transcript47299_g1	blue	146.26	170.78	128.92	69.81	64.36	61.96	84.38	87.78	101.45	139.16	115.07	112.91	77.61	119.7	119.7
LRWT_f4p0_560_transcript87309_g4	blue	151.49	101.87	118.84	48.05	62.34	73.13	91.5	103.65	104.54	66.02	27.95	45.23	53.1	39.83	39.83
LRWT_f24p0_1826_transcript31916_g1	blue	168.11	111.04	160.22	94.83	125.35	137.54	171.87	160.28	151.34	163.72	128.57	147.58	92.38	108.89	108.89
LRWT_f19p0_2301_transcript23536_g1	blue	157.13	128.89	152.21	128.59	133.11	133.09	161.98	112.05	107.02	189.44	211.21	210.3	76.59	61.45	61.45
LRWT_f33p0_1630_transcript36957_g1	blue	139.68	53.34	52.57	154.41	12.02	17.25	2.46	0	63.72	54.69	8.99	45.08	37.73	0	0
LRWT_f7p0_495_transcript89803_g1	blue	125.65	107.27	119.99	41.43	70.87	69.35	177.89	55.99	79.34	174.58	111.42	114.54	85.48	77.71	77.71
LRWT_f3p0_1480_transcript46808_g10	blue	273.13	269.13	245.51	238.74	251.96	242.29	237.18	197.91	203.43	233.29	294.27	244.03	212.84	193.49	193.49
LRWT_f25p0_1547_transcript41606_g1	blue	107.3	136.55	93.69	78.46	104.07	103.23	116.34	128.15	97.34	166.64	162.82	149.75	69.83	64.68	64.68
LRWT_f3p0_789_transcript75433_g7	blue	83.51	20.32	39.86	64.56	54.45	18.73	19.7	46.03	45.85	83.6	89.56	53.76	25.58	3.77	3.77
LRWT_f5p0_1971_transcript30791_g6	blue	153.14	139.89	125.12	74.8	114.36	97.46	106.38	134.74	111.71	157.99	127.4	158.56	84.09	59.83	59.83
LRWT_f2p0_1666_transcript40214_g8	blue	189.69	167.64	152.92	106.8	96.78	58.1	85.98	83.5	39.81	42.1	82.93	47.93	118.17	79.41	79.41
LRWT_f6p0_2267_transcript23543_g1	blue	404.77	298.73	330.26	222.57	309.02	277.43	347.11	334.94	304.95	325.12	366.45	289.97	249.85	303.4	303.4
LRWT_f6p0_1464_transcript47040_g1	blue	111.37	59.91	2.88	9.07	46.13	26.79	26.19	0	108.73	41.87	111.13	53.23	0.54	34.6	34.6
LRWT_f3p0_1603_transcript41843_g1	blue	170.66	214.77	147.34	122.17	103.46	97.9	89.45	83.28	148.28	197.69	164.75	174.39	111.26	123.07	123.07
LRWT_f24p0_891_transcript69384_g1	blue	244.27	224.17	236.63	132.15	115.8	139.01	144.63	123.68	137.97	173.71	179.87	175.12	162.68	164.18	164.18
LRWT_f25p0_627_transcript82552_g1	blue	166.8	180.21	248.25	54.12	68.44	72.99	45.55	54.15	46.98	149.26	125.8	141.79	29.57	43.32	43.32
LRWT_f15p0_1098_transcript60378_g1	blue	152.31	232.7	173.58	126.35	88.8	163.35	92.69	157.69	114.54	111.74	178.48	144.55	93.49	148.59	148.59
LRWT_f7p0_1043_transcript63763_g1	blue	111.16	118.18	87.13	39.89	56.36	43.33	109.48	37.64	60.28	38.46	68.32	109.5	67.47	79.22	79.22
LRWT_f2p0_659_transcript82109_g6	blue	133.25	127.54	140.25	208.28	115.69	86.13	63.68	80.31	55.38	90.19	57.11	58.56	57.19	82.14	82.14
LRWT_f2p0_798_transcript74934_g5	blue	79.13	98.77	88.93	117.42	78.29	52.68	33.25	39.48	26.93	29.63	96.77	58.2	88.96	52.96	52.96
LRWT_f2p0_991_transcript66625_g15	blue	70.25	41	63.75	43.19	32.61	68.92	73.14	20.25	18.25	136.05	122.1	153.71	12.02	28.7	28.7
LRWT_f22p0_1621_transcript39209_g1	blue	231.12	118.47	141.44	90.45	129.75	180.5	152.83	86.12	125.67	273.97	128.8	170.31	117.86	103.91	103.91
LRWT_f7p0_1341_transcript51401_g1	blue	273.04	248.8	77.38	74.35	139.93	92.54	245.84	166.15	82.18	1.92	108.86	50.43	59.49	84.29	84.29
LRWT_f4p0_675_transcript81100_g3	blue	113.9	130.54	153.88	102.32	105.73	81.21	56.82	77.6	93	179.98	177.95	169.58	65.02	86.73	86.73
LRWT_f4p0_2143_transcript26751_g2	blue	25.22	372.79	164.88	3.84	35.36	75.61	116.05	39.11	16.45	26.67	37.66	168.31	50.94	61.33	61.33
LRWT_f3p0_1997_transcript30284_g6	blue	101.13	148.35	115.12	63.43	62.82	87.45	35.65	49.92	41.73	99.59	79.93	78.72	38.78	34.34	34.34
LRWT_f2p0_1222_transcript56769_g10	blue	105.6	105.42	100.61	80.79	88.13	55.95	49.65	109.41	68.4	101.62	72.14	96.41	48.54	35.64	35.64
LRWT_f7p0_2420_transcript20970_g1	blue	134.32	136.57	124.08	57.89	71.18	57.72	101.24	99.04	81	100.72	102.05	101.62	77.19	74.46	74.46
LRWT_f13p0_1457_transcript47041_g1	blue	161.79	147.65	115.03	55.41	51.45	52.7	86.24	54.51	109.95	55.42	77.73	80.33	113.62	53.23	53.23
LRWT_f4p0_2181_transcript26124_g1	blue	170.79	143.45	98.25	91.73	87.99	88.25	147.03	128.19	158.45	139.76	120.81	119.03	93.87	98.56	98.56
LRWT_f4p0_1294_transcript53247_g4	blue	120.05	143.48	91.65	85.2	81.42	86.99	93.92	68.51	58.53	143.32	118.28	96.04	76.29	129.66	129.66
LRWT_f8p0_931_transcript67537_g1	blue	178.05	183.43	211.92	189.84	183.41	207.71	179.36	161.18	147.18	183.57	242.28	229.04	151.63	144.05	144.05
LRWT_f29p0_379_transcript96961_g1	blue	96.48	118.38	83.26	37.1	35.7	41.51	63.11	14.59	15.76	20.56	59.99	31.6	90.66	60.08	60.08
LRWT_f3p0_955_transcript68353_g6	blue	145.89	213.94	88.28	82.62	101.91	105.29	94.37	111.61	118.39	209.03	175.07	122.83	64.4	128.09	128.09
LRWT_f8p0_957_transcript67523_g1	blue	73.2	66.48	47.85	81.99	77.16	38.45	18.54	59.99	62.41	144.77	105.24	137.08	33.05	30.98	30.98
LRWT_f2p0_2904_transcript14691_g2	blue	232.5	204.79	212.95	175.14	196.45	187.55	199.08	184.33	200.21	228.41	245.12	233.53	175.12	173.2	173.2
LRWT_f4p0_2688_transcript17401_g1	blue	141.54	118.61	118.53	76.43	122.49	73.88	79.48	121.61	93.92	82.91	99.94	94.49	60.27	70.01	70.01
LRWT_f2p0_475_transcript92077_g5	blue	130.18	103.88	150.69	145.78	77.49	140.48	45.41	71.36	58.59	112.06	93.72	58.94	91.95	68.17	68.17
LRWT_f2p0_1751_transcript37437_g11	blue	91.52	98.13	87.9	39.61	52.81	44.73	64.13	59.3	72.85	99.84	80.25	64.3	32.4	38.37	38.37
LRWT_f6p0_564_transcript87116_g1	blue	92.99	93.06	50.2	26.96	17.92	19.63	4.01	16.98	44.97	48.95	86.8	42.72	72.33	50.52	50.52
LRWT_f2p0_799_transcript74889_g4	blue	74.94	140.7	96.26	69.48	117.5	66.41	97.32	80.85	107.48	120.1	57.56	94.82	45.17	51.77	51.77
LRWT_f57p0_1111_transcript59310_g1	blue	18.88	15.55	122.89	49.03	22.84	56.08	47.71	42.53	15.14	105.49	150.66	70.74	50.73	33.26	33.26
LRWT_f2p0_1414_transcript48873_g3	blue	198.57	212.86	211.73	137.79	155.65	154.9	133.86	155.7	142.98	206.34	200.1	175.57	163.16	176.43	176.43
LRWT_f5p0_737_transcript77406_g1	blue	123.6	23.95	105.54	16.13	31.49	32.64	24.98	19.22	54.45	105.61	56.02	72.16	45.7	61.16	61.16
LRWT_f3p0_453_transcript94530_g15	blue	96.88	40.63	157.55	32.53	18.66	22.53	22.65	3.94	27.82	9.65	45.87	5.56	89.91	56.94	56.94
LRWT_f2p0_1426_transcript48731_g4	blue	344.79	368.69	317.68	401.36	310.56	311.24	270.32	333.34	318.91	377.51	385.15	366.55	380.77	319.22	319.22
LRWT_f3p0_2068_transcript28609_g2	blue	212.31	206.22	198.78	66.14	133.13	142.08	224.67	179.23	193.3	203.2	211.4	216.02	80.24	89.16	89.16
LRWT_f2p0_1259_transcript54327_g2	blue	318.85	282.64	308.08	189.83	240.55	250.07	262.3	259.04	213.97	223.21	241.52	200.17	205.48	217.86	217.86
LRWT_f10p0_1918_transcript31469_g1	blue	100.44	113.25	96.73	121.44	125.83	74.96	75.72	71.8	65.28	53.09	101.25	71.45	85.89	52.98	52.98
LRWT_f4p0_2650_transcript18121_g2	blue	159.62	135.31	149.87	81.72	121.99	99.54	123.32	123.3	113.8	109.83	153.25	142	79.89	65.11	65.11
LRWT_f41p0_879_transcript67530_g1	blue	80.5	105.57	120.1	67.29	45.67	51.04	22.6	33.32	44.23	80.29	84.22	95.17	45.58	68.08	68.08
LRWT_f27p0_1687_transcript36946_g1	blue	217.81	189.37	198.49	66.3	107.72	96.34	147.69	112.3	111.48	138.86	138.8	125.85	89.96	101.97	101.97
LRWT_f5p0_1797_transcript35493_g2	blue	253.85	251.12	272.49	124.15	102.12	121.49	101.91	107.87	92.3	183.87	180.99	173.07	127.85	111.11	111.11
LRWT_f61p0_1697_transcript37864_g1	blue	228.63	191.14	217.29	107.94	126.29	99.19	130.16	184.19	130.98	125.14	175.43	138.75	93.36	109.89	109.89
LRWT_f2p0_722_transcript78848_g17	blue	170.14	88.28	193.66	31.94	43.43	24.23	48.74	10.61	10.97	10.23	76.49	18.41	90.53	33.18	33.18
LRWT_f6p0_2445_transcript21169_g3	blue	128.77	114.99	102.94	49.15	71.84	72.47	86.4	66.76	78.35	109.76	100.96	109.84	64.46	56.14	56.14
LRWT_f66p0_1115_transcript59532_g1	blue	209.77	284	235.2	77.79	126.92	111.86	174.14	147.26	122.86	141.86	149.31	153.33	151.46	149.13	149.13
LRWT_f5p0_591_transcript84862_g1	blue	240.46	224.42	165.61	110.14	80.64	101.56	120.87	135.81	102.05	145.57	156.16	106.79	126.5	128.97	128.97
LRWT_f6p0_2772_transcript16121_g2	blue	110.78	84.25	140.6	118.72	99.47	112.44	94.85	87.06	118.46	121.61	178.07	171.3	88.61	88.54	88.54
LRWT_f15p0_1104_transcript60976_g2	blue	329.01	323.69	346.67	311.86	338.23	338.75	307.04	277.29	266.66	317.73	374.99	365.95	295.6	244.05	244.05
LRWT_f102p0_1126_transcript57123_g1	blue	167.92	205.69	235.09	108.61	126.94	108.8	165.73	98.39	93.48	123.42	218.34	128.44	110.92	101.35	101.35
LRWT_f2p0_739_transcript77917_g4	blue	119.97	125.13	133.74	75.9	108.76	159.46	151.33	77.86	72.75	168.44	111.69	172.35	101.83	102.11	102.11
LRWT_f15p0_1131_transcript60024_g1	blue	98.03	84.78	77.48	20.78	20.5	11.5	20.28	42.83	24.02	48.69	48.9	36.96	14.14	44.58	44.58
LRWT_f2p0_871_transcript66171_g1	blue	131.88	185.9	135.2	79.6	89.92	64.04	127.74	125.89	94.93	64.89	103.42	99.19	78.12	73.19	73.19
LRWT_f2p0_1448_transcript47928_g9	blue	164.35	105.12	117.1	95.07	157.05	136.5	101.2	109.85	114.98	191.36	134.75	187.91	75.71	69.96	69.96
LRWT_f4p0_1061_transcript62937_g5	blue	83.74	37.6	51.35	58.77	24.77	27.3	24.59	46.19	39.88	98.95	44.27	68.49	12.54	73.27	73.27
LRWT_f12p0_1276_transcript52130_g1	blue	244.29	202.62	164.96	99.45	120.6	111.09	94.65	78.16	48.34	83.5	126.92	94.72	103.7	65.41	65.41
LRWT_f23p0_1688_transcript37590_g1	blue	60.29	28.17	106.86	36.43	60.55	37.91	42.84	5.1	6.68	24.73	21.13	6.28	54.1	6.89	6.89
LRWT_f6p0_2088_transcript27904_g2	blue	170.78	170.38	168.46	95.51	108.79	106.95	122.97	128.22	130.31	156.37	164.67	159.57	120.95	113.94	113.94
LRWT_f10p0_1655_transcript39562_g1	blue	122.4	101.05	107.41	134.83	101.36	85.78	57.67	53.68	47.92	73.64	120.35	74	104.8	64.53	64.53
LRWT_f13p0_1316_transcript52350_g1	blue	86.59	91.97	102.28	31.42	63.23	29.36	87.45	78.9	39.28	41.46	48.64	35.23	63.57	56.41	56.41
LRWT_f3p0_1771_transcript36709_g5	blue	118.42	131.39	82.22	13.3	10.5	31.62	26.88	40.97	0.54	7.85	14.45	38.91	12.66	55.3	55.3
LRWT_f5p0_1058_transcript63100_g2	blue	102.44	140.07	118.61	85.74	105.93	69.11	56.64	64.75	41.75	93.04	93.39	93.7	63.52	50.12	50.12
LRWT_f5p0_1270_transcript54764_g6	blue	295.79	326.58	274.89	290.09	277.76	277.48	214.02	210.54	181.08	277.42	329.9	257.17	258.15	199.91	199.91
LRWT_f12p0_2366_transcript22009_g1	blue	171.44	184.9	163.89	92.17	106.95	105.83	94.58	119.6	115.29	138.2	141.28	156.99	113.68	115.03	115.03
LRWT_f3p0_1715_transcript38507_g4	blue	66.36	55.15	69.58	50.12	48.84	27.66	37.42	29.56	68.21	97.34	74.76	107.64	21.87	23.93	23.93
LRWT_f2p0_838_transcript72963_g10	blue	275.91	317.51	298.58	150.42	123.49	141.34	169.26	117.5	73.06	148.81	178.58	150.01	183.1	172.73	172.73
LRWT_f2p0_1272_transcript54902_g15	blue	76.72	105.57	96.87	41.23	42.68	40.34	77.1	51.44	57	45.69	93.45	71.85	31.29	25.32	25.32
LRWT_f3p0_849_transcript72711_g9	blue	76.66	0.17	57.14	0.17	23.59	76.86	35.96	11.58	0	8.27	70.18	2.13	66.23	20.58	20.58
LRWT_f35p0_646_transcript80520_g1	blue	284.56	298.48	292.66	242.7	228.05	239.31	212.6	218.99	239.2	263.33	271.86	253.75	201.93	236.18	236.18
LRWT_f11p0_1671_transcript38060_g2	blue	100.02	139.1	103.51	69.11	101.18	66.41	67.49	61.83	108.86	103.58	92.29	100.83	71.99	69.79	69.79
LRWT_f2p0_1740_transcript36391_g2	blue	56.02	57.21	32.02	12.93	38.27	17.09	69.48	38.19	63.77	29.63	58.04	37.76	16.88	3.87	3.87
LRWT_f5p0_1137_transcript59669_g1	blue	181.15	129.17	183.2	98.64	167.15	163.22	146.75	57.73	142.98	123.81	175.81	143.87	111.79	122.96	122.96
LRWT_f40p0_796_transcript73295_g1	blue	153.88	174.65	171.61	111.46	110.19	101.22	110.13	115.09	96.78	136.5	135.95	135.3	125.6	137.47	137.47
LRWT_f2p0_1293_transcript54491_g17	blue	82.05	16.42	87.15	7.72	32.82	33.44	72.53	63.17	14.07	28.99	52.49	36.57	67.24	36.57	36.57
LRWT_f2p0_1307_transcript53378_g7	blue	208.98	202.62	166.42	105.16	130.59	140	175.53	173.28	110.48	126.89	143.66	105.14	122.33	110.52	110.52
LRWT_f7p0_1757_transcript36820_g2	blue	320.34	303.99	286.42	192.34	212.39	208.38	221.92	183.52	203.13	238.53	279.03	240.55	196.19	192.28	192.28
LRWT_f2p0_698_transcript80132_g17	blue	5.37	21.04	451.59	15.74	11.93	33.48	281.35	215.12	13.69	572.82	38.09	8.76	42.81	33.77	33.77
LRWT_f2p0_641_transcript83109_g7	blue	68.06	53.04	71.83	15.67	28.68	31.02	77.73	25.08	5.3	59.52	80.8	47.98	84.91	42.95	42.95
LRWT_f7p0_1107_transcript60673_g1	blue	292.28	264.71	268.85	216.72	219.03	221.47	238.31	226.75	253.62	252.11	246.79	278.1	275.74	233.55	233.55
LRWT_f55p0_948_transcript64718_g1	blue	210.03	239.06	210.74	147.22	119.03	105.74	131.41	151.06	117.99	97.6	142.92	113.42	151.25	107.66	107.66
LRWT_f3p0_1017_transcript65058_g7	blue	357.27	308.09	345.51	292.26	389.09	252.07	233.48	242.43	222.74	348.75	235.05	229.07	179.53	234.31	234.31
LRWT_f2p0_778_transcript76018_g11	blue	104.2	109.04	30.15	85.3	65.72	59.47	75.61	42.34	44.05	100.37	76.63	39.13	82.88	57.81	57.81
LRWT_f3p0_1730_transcript37969_g3	blue	100.41	49.84	59.56	23.73	46.54	39.33	95.16	66.29	72.52	80.89	52.95	62.79	28	28.47	28.47
LRWT_f3p0_3527_transcript7849_g3	blue	108.37	44.86	174.28	51.89	89.32	48.14	64.37	52.55	103.61	93.79	129.75	83.67	23.26	45.95	45.95
LRWT_f3p0_1230_transcript56282_g2	blue	114.62	129.33	139.89	88.2	79.58	51.05	69.38	52.9	44.92	83.95	138.07	100.26	101.29	88.88	88.88
LRWT_f25p0_1288_transcript51241_g2	blue	150.01	162.93	132.48	69.82	53.91	56.32	75.37	62.17	63.52	107.73	110.92	87.29	68.44	81.63	81.63
LRWT_f37p0_578_transcript84571_g1	blue	125.11	209.2	151.05	135.31	98.6	78.4	64.85	79.7	51.34	106.17	135.44	115.98	90.14	116.34	116.34
LRWT_f3p0_1866_transcript33771_g1	blue	231.08	108.89	151.46	78.12	92.58	157.36	180.14	128.99	109.63	108.44	90.58	206.31	156.88	104.23	104.23
LRWT_f2p0_797_transcript75051_g15	blue	76.72	100.8	84.95	117.06	75.28	40.24	27.61	36.74	29.06	23.11	84.69	46.89	63.35	44.12	44.12
LRWT_f4p0_570_transcript86946_g8	blue	105.86	119.94	67.73	53.93	49.6	35.41	34.95	62.49	20.01	21.82	73.28	45.19	52.85	80.81	80.81
LRWT_f7p0_624_transcript83825_g3	blue	107.58	91	96.81	29.76	20.71	29.99	54.17	41.58	51.95	81.67	67.28	72.3	57.18	60.42	60.42
LRWT_f3p0_1987_transcript30870_g4	blue	112.87	89.68	94.19	63.56	75.22	56.84	81.19	74.1	77.13	95.92	114.39	106.48	56.97	35.63	35.63
LRWT_f11p0_586_transcript84829_g2	blue	150.75	75.21	142.51	66.83	52.15	79.44	66.4	35.06	83.43	70.94	105.51	71.84	36.33	47.28	47.28
LRWT_f2p0_769_transcript76411_g1	blue	112.97	140.99	82.01	24.03	42.59	15.36	19.55	38.7	39.65	56.09	70.31	62.56	61.83	43.77	43.77
LRWT_f30p0_778_transcript72957_g1	blue	282.73	243.88	232.08	102.71	97.02	110.57	133.68	143.11	109.03	135.28	152.47	127.24	137.89	131.16	131.16
LRWT_f9p0_1210_transcript56458_g1	blue	246.09	167.88	104.33	31.91	26.18	95.01	224.74	67.21	49.47	51.49	46.11	64.37	62.47	64.87	64.87
LRWT_f6p0_2445_transcript20870_g1	blue	108.87	102.15	93.91	65	111.41	95.44	78.47	116.89	114.02	74.27	126.72	148.38	77.52	71.94	71.94
LRWT_f11p0_1068_transcript61059_g2	blue	104.16	90.95	98	39.7	29.37	60.94	55.84	79.51	53.97	78.6	54.69	39.76	24.54	62.25	62.25
LRWT_f33p0_1386_transcript49077_g1	blue	74.94	45.03	62.31	35.13	33.39	36.92	74.11	65.65	76.01	63.14	94.16	109.03	43.74	26.27	26.27
LRWT_f3p0_2109_transcript27703_g3	blue	65.95	71.01	47.4	16.15	35.01	31.5	94.4	81.95	45.35	24.23	92.39	58.8	68.76	42.17	42.17
LRWT_f3p0_2990_transcript13591_g1	blue	235.09	248.73	228.56	141.86	183.53	200.02	213.76	202.04	210.34	215.57	228.71	210.18	161.52	153.23	153.23
LRWT_f2p0_2209_transcript23715_g1	blue	85.26	87.4	91.26	81.38	77.19	34.27	28.74	48.9	62.48	300	67.41	107.74	32.96	51.67	51.67
LRWT_f5p0_551_transcript87909_g3	blue	67.98	132.36	33.4	25.8	73.42	44.25	52.94	60.87	30.28	59.34	53.2	21.2	20.18	8.66	8.66
LRWT_f21p0_1018_transcript64149_g1	blue	99.23	79.35	173.3	68.9	87.78	83.25	105	124.38	130.94	219.69	112.43	118.81	81.91	100.37	100.37
LRWT_f27p0_1296_transcript51139_g1	blue	187.64	201.96	198.13	181.22	191.26	192.75	156.11	161.1	158.64	162.24	186.16	179.78	154.27	144.03	144.03
LRWT_f2p0_417_transcript95332_g5	blue	35.31	1.31	90.12	21.75	9.17	19.64	0.44	19.51	33.36	40.58	56.72	35.1	0.43	0.95	0.95
LRWT_f2p0_1636_transcript41334_g13	blue	299.44	274.21	264.74	254.28	272.26	277.1	238.23	254.98	240.28	272.89	278.59	258.51	233.11	239.88	239.88
LRWT_f4p0_1023_transcript64696_g4	blue	108.94	93.38	84.86	29.51	35.58	28.5	22.04	65.39	53.79	43.37	76.86	49.38	47.53	64.2	64.2
LRWT_f8p0_877_transcript69917_g3	blue	195.92	205.67	205.47	221.89	178.34	191.07	198.44	222.81	168.28	253.9	207.2	247.5	203.79	177.3	177.3
LRWT_f2p0_1744_transcript36967_g1	blue	195.62	184.73	180.57	128.74	115.52	122.26	155.2	132.54	95.62	120.63	160.6	130.51	140.82	140.34	140.34
LRWT_f30p0_1895_transcript32178_g1	blue	195.12	220.12	211.59	178.58	190.08	191.04	176.67	198.94	172.96	276.01	191.64	228.44	105.14	141.49	141.49
LRWT_f2p0_919_transcript69284_g18	blue	80.08	162.5	64.19	30.48	20.07	20.32	70.41	23.69	10.45	61.55	47.62	83.68	26.33	38.1	38.1
LRWT_f2p0_1333_transcript52250_g9	blue	137.04	119.79	79.13	27.68	32.26	22.58	19.93	49.94	40.6	67.94	62.53	62.62	39.51	39.03	39.03
LRWT_f2p0_1853_transcript34681_g16	blue	248.87	227.76	240.79	136.08	182.82	165.13	209.15	256.28	216.3	164.8	177.14	181.75	194.2	181.51	181.51
LRWT_f7p0_940_transcript64731_g1	blue	62.96	66.57	78.55	19.16	22.91	28.2	21.96	24.53	25.24	47.31	45.05	43.79	63.01	61.11	61.11
LRWT_f3p0_1886_transcript33216_g3	blue	142.5	115.03	135.22	103.81	125.87	113.47	97.92	94.43	83.95	130.09	133.62	130.16	95.55	91.62	91.62
LRWT_f3p0_1220_transcript56701_g1	blue	129.61	112.19	102.33	44.64	52	70.23	42.91	53.11	40.88	78.65	122.1	116.18	35.01	60.83	60.83
LRWT_f2p0_1329_transcript52585_g19	blue	59.56	15.77	24.86	8.08	44.53	30.19	28.26	16.73	50.16	44.05	70.68	47.07	10.37	5.35	5.35
LRWT_f2p0_1012_transcript65194_g5	blue	87.93	37.35	52.99	1.19	4.63	9.69	79.3	2.92	1.45	94.59	1.78	3.11	20.7	37.22	37.22
LRWT_f31p0_1565_transcript42742_g1	blue	87.38	22.84	58.91	5.25	4.37	19.97	33.43	25.3	81.52	33.16	32.71	31.94	7.6	7.37	7.37
LRWT_f3p0_1055_transcript63583_g3	blue	132.96	118.46	136.39	79.7	80.76	106.35	82.88	91.24	80.97	154.79	115.29	115.1	120.52	126.5	126.5
LRWT_f61p0_3321_transcript8118_g1	blue	81.33	66.99	70.09	37.95	74.56	74.58	43.09	58.7	53.99	39.61	85.46	89.58	60.75	30.76	30.76
LRWT_f3p0_1366_transcript51051_g4	blue	114.99	104.81	92.56	29.66	38.86	31.76	47.31	59.94	41.6	65.01	89.06	55.47	29.67	28.59	28.59
LRWT_f2p0_819_transcript73929_g11	blue	55.58	132.54	46.6	28.75	49.4	44	28.99	37.26	48.77	115.08	84.42	65.86	41.3	22.64	22.64
LRWT_f51p0_1511_transcript43919_g1	blue	186.4	188.49	184.28	133.86	148.55	146.18	155.63	163.12	205.78	193.41	171.28	185.86	145.57	154.83	154.83
LRWT_f5p0_528_transcript85310_g1	blue	84.4	107.31	112.37	35.69	42.38	44.64	32.27	55.75	34.3	67.08	72.23	81.64	49.56	69.08	69.08
LRWT_f2p0_1247_transcript55880_g11	blue	99.5	71.03	75.25	28.27	26.33	56.77	73.57	64.5	45.27	53.57	43.95	64.79	52.67	29.26	29.26
LRWT_f2p0_708_transcript79791_g19	blue	47.28	82.08	82.8	32.97	48.15	34.54	50.42	22.4	11.66	10.14	25.07	16.15	2.6	7.61	7.61
LRWT_f33p0_1115_transcript59401_g1	blue	188.08	200.05	99.13	100.62	113.94	55.71	99.87	91.38	108.82	66.68	90.51	70.52	53.72	83.58	83.58
LRWT_f3p0_550_transcript87948_g2	blue	121.46	43.95	84.36	66.98	20.83	59.66	58.27	37.25	34.29	201.38	77.19	74.56	14.02	78.6	78.6
LRWT_f34p0_2540_transcript18480_g1	blue	123.63	125.29	102.82	98.17	94.65	93.08	120.02	100.77	100.59	98.7	143.25	123.87	83.26	73.95	73.95
LRWT_f8p0_890_transcript69103_g1	blue	115.94	106.33	96.87	45.02	43.65	41.45	62.21	58.53	44.31	73.77	76.85	54.92	44.73	62.44	62.44
LRWT_f4p0_484_transcript89088_g1	blue	54.4	18.88	47.56	30.38	44.83	22.22	13.22	15.86	6.14	61.16	62.57	50.04	50.07	24.21	24.21
LRWT_f4p0_1561_transcript43502_g2	blue	85.2	100.37	61.14	43.11	49.75	15.4	5.54	40.93	41.79	23.83	72.37	26.73	19.9	34.24	34.24
LRWT_f3p0_842_transcript72764_g1	blue	130.88	132.51	142.78	68.71	66.78	72.91	98.66	86.54	83.07	63	79.15	90.5	97.15	107.5	107.5
LRWT_f4p0_1261_transcript54788_g7	blue	127.55	87.52	156.26	50.31	39.36	56.63	104.33	114.88	71.64	64.12	81.12	86.77	65.5	81.11	81.11
LRWT_f2p0_2470_transcript21078_g6	blue	238.66	222.86	223.78	135.08	169.75	144.48	180.4	203.38	181.24	162.08	162.62	180.62	158.92	152.77	152.77
LRWT_f10p0_1510_transcript44059_g1	blue	139.38	154.94	146.44	75.07	92.45	80.7	78.68	75.97	88.58	110.53	125.22	111.7	82.88	93.57	93.57
LRWT_f22p0_1311_transcript49923_g1	blue	153.15	151.69	142.55	85.39	91.35	76.77	87.84	122.17	99.89	119.54	110.62	118.11	83	84.95	84.95
LRWT_f2p0_623_transcript84889_g16	blue	128.7	138.21	55.68	31.49	48.22	26.41	7.88	28.84	65.08	78.08	117.01	45.78	59.28	38.18	38.18
LRWT_f56p0_1360_transcript46471_g1	blue	54.93	88.75	149.27	54.89	37.07	75.63	30.36	28.84	60.03	66.73	38.85	43.22	22.94	14.57	14.57
LRWT_f23p0_657_transcript80597_g2	blue	74.85	90.21	113.57	65.66	27.99	38.87	33.85	30.62	36.03	75.37	68.75	77.36	44.79	43.1	43.1
LRWT_f4p0_1461_transcript46732_g2	blue	99.89	122.37	87.6	93.52	82.2	55.62	53.17	67.38	51.29	58.89	89.95	68.46	106.37	73.17	73.17
LRWT_f6p0_1428_transcript47033_g2	blue	106.04	125.96	110.51	88.2	99.12	98.08	84.58	77.34	70.69	93.75	115.23	114.12	76.4	61.41	61.41
LRWT_f4p0_1024_transcript64488_g1	blue	70.49	31.77	55.46	87.94	21.5	32.42	33.87	21.8	31.05	38.72	72.76	72.18	12	43.96	43.96
LRWT_f26p0_2095_transcript27220_g1	blue	93.24	98.41	84.85	55.89	59.54	56.2	57.46	52.34	74.09	93.67	85.94	92.56	61.66	75.84	75.84
LRWT_f4p0_2702_transcript16858_g2	blue	142.64	125.44	119.45	103.08	102.74	112.45	112.82	82.83	139.08	138.17	160.16	134.88	129.63	63.99	63.99
LRWT_f2p0_357_transcript99464_g20	blue	36.02	54.34	57.87	32.29	12.69	18.31	12.85	17.66	16.58	60.59	68.79	34.36	33.24	36.81	36.81
LRWT_f34p0_1345_transcript49095_g1	blue	135.65	140.9	141.48	59.08	56.09	81.43	92.52	71.34	55.65	95.8	102.05	109.79	77.45	88.01	88.01
LRWT_f7p0_1690_transcript34886_g1	blue	85.25	68.64	76.84	37.26	60.28	53.15	96.52	99.32	47.82	69.7	82.81	75.99	41	36.74	36.74
LRWT_f3p0_1872_transcript33631_g4	blue	109.45	79.48	74.79	67.44	52.79	43.72	49	40.93	37.79	32.39	82.46	45.63	52.28	21.49	21.49
LRWT_f80p0_1083_transcript58122_g1	blue	190.22	244.47	192.37	158.78	143.68	154.24	207.74	161.91	127.58	249.78	182.16	175.38	182.2	171.09	171.09
LRWT_f10p0_1360_transcript49719_g1	blue	107.37	87.83	49.82	3.37	0.98	5.45	36.57	10.2	6.01	1.99	73.06	15.43	20.7	19.96	19.96
LRWT_f12p0_1246_transcript51937_g1	blue	181.76	186.64	163.72	114.75	141.19	143.83	125.66	116.48	131.54	154.03	168.72	172.64	126.9	124.63	124.63
LRWT_f2p0_546_transcript88289_g21	blue	174.91	323.83	185.29	91.5	88.81	91.15	93.22	113.01	82.25	117.87	107.9	109.76	109.59	118.19	118.19
LRWT_f15p0_716_transcript76679_g1	blue	91.61	172.91	65.36	37.76	43.84	31.55	32.91	72.38	30.28	81.85	78.65	66.62	80.88	63.59	63.59
LRWT_f8p0_1471_transcript45674_g3	blue	109.46	121.95	123.62	43.76	60.17	43.7	62.95	48.28	53.13	98.67	101.6	103.24	31.71	58.55	58.55
LRWT_f2p0_1602_transcript42405_g8	blue	152.17	91.85	105.71	98.49	150.96	126.52	153.99	90.75	105.57	146.72	107.15	139.3	145.58	106.52	106.52
LRWT_f9p0_1906_transcript31491_g2	blue	48.53	15.7	27.21	33.37	30.98	46.45	23.23	13.8	34.62	71.81	78.6	59.41	0.39	51.02	51.02
LRWT_f5p0_1481_transcript46411_g1	blue	152.68	173.12	144.92	73.03	75.45	78.28	74.51	95.79	89.38	140	131.78	134.78	65.2	88.95	88.95
LRWT_f3p0_776_transcript77233_g11	blue	93.14	141.7	116.42	97.24	65.36	135.56	41.61	129.66	102.34	128.76	148.54	109.48	116.89	97.49	97.49
LRWT_f3p0_930_transcript68732_g1	blue	119.35	102.38	99.55	60.3	67.58	74.06	60.27	63.84	75.85	83.95	101.37	81.72	65.4	84.27	84.27
LRWT_f9p0_768_transcript75399_g1	blue	85.03	102.92	115.81	131.53	72.32	50.23	47.91	42.44	28.47	47.5	109.65	62.4	72.41	63.77	63.77
LRWT_f3p0_1031_transcript64331_g2	blue	44.49	17.78	216.35	25.86	14.37	10.61	96.79	12.48	12.52	26.86	53.51	88.63	21.42	44.8	44.8
LRWT_f3p0_685_transcript80497_g4	blue	193.7	294.82	176.94	145.38	129.4	130.58	154.13	161.62	137.34	190.47	186.87	171.51	173.94	155.91	155.91
LRWT_f3p0_447_transcript93278_g1	blue	57.36	90.2	69.22	32.9	27.74	30.02	67.8	30.7	21.97	14.85	39.96	36.98	100.36	56.16	56.16
LRWT_f96p0_957_transcript65197_g1	blue	285.29	304.88	323.84	287.47	294.26	303.03	297.1	314.86	272.49	323.38	294.4	310.49	276.78	244.41	244.41
LRWT_f9p0_3000_transcript11971_g1	blue	54.72	65.83	48.21	26.55	31.84	34.53	59.42	43.55	62.28	24.33	59.64	69.23	31.82	24.2	24.2
LRWT_f4p0_1722_transcript37347_g1	blue	96.13	99.23	72.39	65.58	79.34	81.67	73.08	65.45	84.62	111.78	108.59	68.15	59.27	110.08	110.08
LRWT_f2p0_2246_transcript24824_g2	blue	94.84	55.39	75.2	21.94	41.79	34.3	42.94	54.97	16.1	59.01	52.26	52.03	21.97	16.42	16.42
LRWT_f35p0_1866_transcript32589_g1	blue	65.2	81.8	36.75	26.96	7.17	21.64	38.9	27.13	77.33	111.82	37.38	2.91	12.71	11.12	11.12
LRWT_f3p0_1132_transcript60349_g2	blue	171.28	147.54	132.59	74.53	79.35	14.49	90.47	120.8	84.31	34.89	96.13	77.55	41.18	92.73	92.73
LRWT_f4p0_777_transcript75019_g4	blue	327.32	250.44	264.09	111.83	129.58	106.53	97.34	95.73	33.46	80.55	80.92	47.2	79.82	80.34	80.34
LRWT_f11p0_586_transcript80615_g1	blue	32.56	18.44	52.16	11.34	28.79	8.83	15.09	32.45	25.85	48.51	47.93	48.89	48.03	12.88	12.88
LRWT_f9p0_1251_transcript53292_g1	blue	106.63	103.67	97.3	45.21	61.98	68.44	48.08	92.69	64.72	61.06	55.56	57.89	39.29	42.54	42.54
LRWT_f12p0_666_transcript80699_g3	blue	76.67	87.26	70.66	64.51	67.09	49.11	36.21	35.35	26.6	49.71	71.5	82.79	33.96	36.6	36.6
LRWT_f2p0_1367_transcript50424_g2	blue	162.07	121.7	184.79	47.44	92.41	34.23	39.81	38.58	74.44	37.2	81.84	78.73	49.97	48.3	48.3
LRWT_f14p0_1321_transcript50058_g1	blue	157.8	181.77	199.96	113.54	102.61	104.07	78.78	119.27	117.84	86.87	74.06	68.27	98.5	94.52	94.52
LRWT_f2p0_1182_transcript58329_g4	blue	116.56	92.79	115.43	84.56	69.01	65.83	80.43	93.72	91.92	116.57	84.91	82.15	49.54	107.6	107.6
LRWT_f2p0_2791_transcript16061_g2	blue	75.21	61.41	65.15	32.11	45.79	44.02	60.95	32.37	27.65	56.06	63.51	62.93	36.61	19.35	19.35
LRWT_f2p0_1881_transcript30953_g1	blue	92.3	108.92	65.86	25.51	58.02	7.56	3.91	11.06	17.94	23.14	57.74	23.77	6.01	13.38	13.38
LRWT_f3p0_903_transcript70004_g4	blue	118.83	163.12	150.57	22.51	23.68	36.14	39.26	36.94	19.92	46.45	38.22	39.09	54.33	55.95	55.95
LRWT_f6p0_2569_transcript19159_g3	blue	67.72	91.95	67.75	34.89	56.28	35.37	33.52	48.44	32.51	71.03	40.73	43.64	21.46	24.81	24.81
LRWT_f27p0_884_transcript68077_g1	blue	67.62	96.3	68.12	51.72	39.73	41.31	25.76	35.73	17.15	71.34	91.55	81.75	35.73	40.34	40.34
LRWT_f9p0_827_transcript71211_g1	blue	51.71	46.93	49.07	25.48	47.39	22.43	24.83	21.11	30.71	47.97	46.77	46.25	20.76	15.27	15.27
LRWT_f61p0_3248_transcript8931_g1	blue	159.41	125.75	158.46	121.03	140.7	114.15	121.56	105.62	105.04	117.82	156.99	116.38	123.53	87.63	87.63
LRWT_f2p0_1662_transcript40204_g4	blue	45.27	53.03	43.61	39.69	25.96	22.05	16.5	7.33	41.36	38.69	24.31	59.08	17.75	6.16	6.16
LRWT_f2p0_1900_transcript33173_g6	blue	127.4	139.52	130.23	54.75	58.57	74.89	65.16	93.81	52.28	93.99	92.22	98.37	75.54	83	83
LRWT_f6p0_1720_transcript35656_g1	blue	148.38	130.26	143.78	115.14	117.52	116.51	133.49	108.62	106.44	132.89	143.62	127.52	93.76	101.38	101.38
LRWT_f3p0_1467_transcript47239_g2	blue	79.69	89.02	92.42	41.38	38.27	48.18	53.68	48.81	42.93	72.68	64.33	60.76	73.26	78.92	78.92
LRWT_f3p0_1616_transcript41937_g2	blue	181.17	31.71	52.84	15.53	11.86	17.81	0	0.18	70.88	88.04	33.6	5.25	2.11	0.18	0.18
LRWT_f2p0_978_transcript67032_g8	blue	59.35	139.58	65.23	69.11	16.67	27.29	13.5	61.32	21.65	23.58	53.83	6.71	42.63	20.87	20.87
LRWT_f2p0_1593_transcript42664_g2	blue	123.25	129.54	117.35	81.74	69.33	70	71	75.28	62.93	129.34	111.29	108.26	97.75	82.44	82.44
LRWT_f4p0_1879_transcript32882_g2	blue	87.08	42.05	52.39	32.55	50.91	27.6	93.31	46.25	71.07	84.78	39.64	49.93	30.99	29.41	29.41
LRWT_f6p0_1359_transcript49150_g1	blue	124.56	91.5	153.34	59.86	84.31	91.63	126.14	78.05	86.27	106.68	141.26	108.57	60.79	88.44	88.44
LRWT_f6p0_231_transcript105832_g7	blue	52.18	0	71.48	24.77	14.45	39.89	33.98	18.35	0	31.85	82.94	40.93	0	12.99	12.99
LRWT_f13p0_1564_transcript41117_g1	blue	151.81	129.67	149.07	127.81	111.14	95.68	124.95	75.56	81.34	119.45	119.22	96.61	112.85	134.56	134.56
LRWT_f7p0_397_transcript95056_g1	blue	135.6	134.42	106.12	121.45	100.04	93.99	86.13	85.47	40.77	84.08	99.15	71.95	118.03	78.88	78.88
LRWT_f8p0_1111_transcript60123_g1	blue	138.04	132.83	128.25	81.25	93.95	92.53	98.79	96.61	99.46	125.27	131.77	116.4	93.22	83.72	83.72
LRWT_f10p0_1149_transcript59290_g1	blue	112.84	93.52	86.61	39.99	42.12	36.66	71.82	56.57	46.03	50.4	57.83	42.77	77.71	70.26	70.26
LRWT_f2p0_2011_transcript29878_g3	blue	42.02	20.77	90.73	34.84	76.55	18.97	19.1	51.91	33.86	49.17	59.8	99.56	35.82	31.2	31.2
LRWT_f2p0_5141_transcript1274_g1	blue	116.46	86.7	109.8	80.03	97.16	113.14	93.46	93.91	90.57	145.87	98.65	108.8	68.27	73.11	73.11
LRWT_f2p0_853_transcript72173_g2	blue	80.97	87.83	41.9	29.16	49.51	34.17	34.37	50.28	17.6	98.52	55.22	57.17	35.35	50.23	50.23
LRWT_f4p0_1725_transcript38065_g2	blue	112.46	112.72	125.54	73.7	100.99	69.41	71.53	103.59	53.47	80.45	108.53	61.59	58.83	65.48	65.48
LRWT_f6p0_3633_transcript6417_g1	blue	110.41	98.8	102.66	75.13	100.16	83.95	94.73	90.27	114.86	145.35	110.75	132.87	72.06	67.21	67.21
LRWT_f4p0_1329_transcript51679_g2	blue	136.39	114.84	100.99	19.79	27.37	29.86	32.14	52.11	30.74	67.76	65.94	74.34	34.61	30.65	30.65
LRWT_f2p0_1483_transcript46654_g5	blue	187.35	183.89	211.49	50.2	49.99	69.39	79.39	41.84	36.86	59.12	88.77	73.92	55.49	50.48	50.48
LRWT_f4p0_1745_transcript37243_g2	blue	33.06	59.79	58.91	41.32	58.38	29.87	31.08	14.14	24.98	15.09	48.85	22.38	25.3	13.98	13.98
LRWT_f4p0_1224_transcript56570_g3	blue	143.56	204.06	167.33	57.82	61.21	52.3	58.14	58.38	39.34	101.86	154.77	120.71	53.08	43.6	43.6
LRWT_f8p0_361_transcript94468_g1	blue	115.41	154.97	107.45	33.7	30.72	7.5	4.34	36.06	16.65	34.8	31.37	59.54	13.75	21.46	21.46
LRWT_f37p0_555_transcript85617_g1	blue	75.75	100.5	100.53	57.29	51.15	37	28.56	35.3	17.38	40.15	73.97	51.68	41.5	60.13	60.13
LRWT_f4p0_3418_transcript8489_g1	blue	173.55	0.44	104.99	16.42	6.95	0.12	15.31	12.3	57.12	45.06	8.91	29.38	15.05	0	0
LRWT_f2p0_723_transcript79570_g18	blue	186.14	219.9	217.07	130.92	144.33	161.85	176.28	180.72	95.08	179.89	177.29	195.31	215.99	191.48	191.48
LRWT_f11p0_3044_transcript12485_g1	blue	69.08	95.3	78.86	49.6	40.2	40.21	49.04	61.37	59.83	77.22	64.27	94.01	37.96	68.97	68.97
LRWT_f2p0_1316_transcript53340_g7	blue	84.31	83.81	71.51	57.34	43.34	41.63	38.1	33.79	41.8	51.99	75.96	57.82	58.69	56.93	56.93
LRWT_f26p0_4206_transcript3302_g1	blue	75.99	60.41	64.91	32.77	45.96	46.22	47.34	46.84	47.84	62.1	66.26	63.58	34.27	29.21	29.21
LRWT_f10p0_1280_transcript53621_g1	blue	83.82	79.04	84.99	69.09	56.57	49.97	42.93	54.37	49.9	78.23	83.66	85.5	70.35	64.03	64.03
LRWT_f5p0_1170_transcript59505_g2	blue	53.77	103.78	64.59	224.76	61.15	44.68	43.84	56.82	65.94	83.04	46.63	109.62	76.1	55.29	55.29
LRWT_f15p0_1006_transcript65026_g1	blue	51.15	82.23	38.14	20.53	41.27	34.94	36.9	78.79	24.38	59.29	24.87	18.56	24.59	18.61	18.61
LRWT_f4p0_983_transcript66330_g3	blue	244.18	262.62	234.9	111.02	125.04	159.56	110.01	125.4	105.68	119.11	122.24	120.6	170.78	126.8	126.8
LRWT_f43p0_1348_transcript50718_g1	blue	93.66	98.55	90.81	68.24	76.43	70.27	66.66	71.03	78.45	95.48	95.47	89.48	50.82	55.61	55.61
LRWT_f8p0_1371_transcript49691_g2	blue	108.52	93.1	95.61	98.81	89.59	80.17	75.05	72.67	67.47	53.75	75.26	74.04	86.02	44.69	44.69
LRWT_f11p0_1107_transcript59410_g1	blue	69.26	103.04	87.8	37.2	63.91	41.24	32.67	50.27	41.71	51.82	78.72	45.67	50.78	66.12	66.12
LRWT_f10p0_1001_transcript63089_g1	blue	94.01	55.41	63.34	12.45	20.29	20.49	34.59	37.62	26.87	60.9	42.78	57.43	17.8	29.72	29.72
LRWT_f6p0_2054_transcript28775_g3	blue	131.95	100	103.3	69.59	86.42	92.96	105.49	80.71	95.99	116.42	118.85	108.91	71.69	81.74	81.74
LRWT_f13p0_1835_transcript34420_g1	blue	121.17	117.17	125.02	52.34	76.72	67.1	92.58	90.85	99.23	105.65	89.15	113.27	81.65	91.42	91.42
LRWT_f2p0_1895_transcript32914_g6	blue	118.13	68.73	78.56	68.68	36.13	44.08	67.23	53.01	100.64	64.81	77.94	78.53	33.69	31.9	31.9
LRWT_f8p0_702_transcript79326_g1	blue	121.05	66.09	180.7	41.97	31.15	78.41	60.9	39.09	39.19	30.57	74.52	41.52	28.09	53.3	53.3
LRWT_f4p0_1000_transcript65584_g2	blue	161.2	142.57	115.19	48.52	49.5	27.01	46.67	54.69	25.08	30.68	50.91	36.71	73.26	55.02	55.02
LRWT_f8p0_905_transcript66353_g1	blue	45.35	55.91	87.47	40.83	72.77	26.69	28.83	40.61	28.03	93.47	63.87	105.45	15.21	27.35	27.35
LRWT_f7p0_1225_transcript56066_g2	blue	177.47	129.03	146.61	31.28	24.61	21.48	35.59	31.47	35.58	115.62	218.9	124.14	52.96	32.65	32.65
LRWT_f3p0_1581_transcript41851_g2	blue	95.95	66.32	139.8	52.22	59.28	40.8	63.4	24.42	40.46	54.98	45.6	67.01	19.47	24.84	24.84
LRWT_f38p0_1855_transcript28373_g1	blue	82.48	112.43	105.17	42.2	43	38.27	40.52	48.08	37.14	52.43	68.32	56.99	60.98	62.91	62.91
LRWT_f2p0_878_transcript71105_g2	blue	74.09	17.74	48.58	16.93	10.62	28.13	22.72	98.08	24.91	5.43	1.92	42.34	27.41	8.82	8.82
LRWT_f2p0_966_transcript67057_g2	blue	54.61	78.31	47.36	23.5	11.4	5.92	5.49	14.02	10.22	25.29	44.72	17.17	29.1	27.87	27.87
LRWT_f3p0_940_transcript67618_g1	blue	53.02	39.15	75.86	85.21	26.15	29.28	49.08	40.09	20.27	61.67	78.56	10.3	9.75	31.89	31.89
LRWT_f41p0_1039_transcript60285_g1	blue	114.05	116.89	109.01	87.21	81.58	80.05	95.43	92.53	110.7	105.12	84.63	121.59	103.95	79.54	79.54
LRWT_f2p0_1512_transcript45603_g3	blue	14.5	61.2	55.86	59.65	25.47	37.41	39.55	11.62	8.41	42.14	17.15	92.94	16.68	30.52	30.52
LRWT_f3p0_1399_transcript49860_g6	blue	188.26	1.32	237.77	3.36	87.84	149.15	38.39	2.04	99.69	677.94	15.04	1.81	2.03	1.2	1.2
LRWT_f3p0_2440_transcript21546_g3	blue	87.54	68.05	90.28	63.78	63.17	60.31	66.47	50.43	68.85	82.81	80.29	72.77	37.17	41.38	41.38
LRWT_f2p0_2762_transcript16500_g2	blue	75.44	66.79	98.98	19.67	34.4	43.54	33.49	20.93	30.75	52.85	35.04	27.31	5.43	14.49	14.49
LRWT_f12p0_729_transcript77872_g1	blue	78.95	100.15	101.27	59	52.89	55.17	48.87	53.62	39.33	77.2	67.43	78.24	64.77	81.74	81.74
LRWT_f3p0_730_transcript78841_g12	blue	128.08	101.27	95.92	53.48	31.07	17.72	50.74	32.36	15.5	20.31	43.21	22.99	44.86	53.47	53.47
LRWT_f4p0_828_transcript72637_g3	blue	70.37	83.75	46.02	21.18	42.65	31.09	33.41	50.46	56.39	66.49	77.56	74.5	36.61	47.19	47.19
LRWT_f20p0_751_transcript75783_g1	blue	90.82	67.87	84.94	56.02	59.59	32.93	30.08	31.42	28.76	45.24	46.76	59.87	40	45.81	45.81
LRWT_f4p0_1721_transcript37652_g2	blue	77.32	76.39	42.99	37.01	40.34	72.48	81.09	49.19	74.02	80.63	63.54	86.32	60.49	52.98	52.98
LRWT_f8p0_765_transcript75755_g1	blue	27.62	55.29	13.88	23.9	14.97	35.14	197.03	8.28	0.7	64.18	29.75	98.68	43.18	15.62	15.62
LRWT_f6p0_946_transcript67815_g1	blue	74.14	41.2	30.06	24.95	31.64	13.53	8.44	11.05	12.63	26	52.81	36.63	46.03	27.26	27.26
LRWT_f33p0_974_transcript65861_g2	blue	185.27	188.59	167.26	163.17	158.61	151.86	134.9	141.89	198.69	194.14	163.1	172.72	142.66	149.38	149.38
LRWT_f2p0_1466_transcript46914_g2	blue	48.97	109.79	40.76	50.21	36.31	48.49	9.48	80.17	46.8	84.05	33.11	60.05	29.6	13.91	13.91
LRWT_f55p0_2434_transcript19674_g1	blue	88.69	95.76	126.59	46.29	68.98	70.94	69.99	91.25	107.78	63.39	56.31	69.08	100.21	66.59	66.59
LRWT_f28p0_2471_transcript18466_g1	blue	118.29	115	112.32	95.15	108.12	92.15	94.35	98.06	98.67	121.31	134.03	121.47	97.33	78.66	78.66
LRWT_f2p0_1931_transcript31980_g6	blue	135.96	117.61	106.48	59.01	70.28	69.8	95.25	86.86	73.22	92.23	106.68	92.96	76.97	79.18	79.18
LRWT_f3p0_1683_transcript39741_g6	blue	98.51	36.4	78.36	67.95	83.69	69.92	19.75	75.87	39.85	159.27	83.56	105.86	59.88	60.87	60.87
LRWT_f7p0_857_transcript71143_g3	blue	131.11	148.28	122.35	105.17	92.72	84.21	71.59	99.89	95.69	79.48	112.83	109.31	135.08	110.51	110.51
LRWT_f2p0_891_transcript70745_g19	blue	87.42	30.15	92.7	25.97	36.34	30.67	37.35	57.6	54.57	43.99	60.31	76.57	72.58	36.03	36.03
LRWT_f9p0_1043_transcript60074_g1	blue	73.67	113.15	83.77	36.32	44.43	48.18	41.47	32.86	28.16	98.69	71.23	67.62	41.15	30.82	30.82
LRWT_f28p0_877_transcript70222_g1	blue	108.15	109.37	94.05	53.43	78.96	67.77	102.72	108.71	93.83	97.66	83.01	91.86	78.32	70.88	70.88
LRWT_f2p0_3394_transcript8917_g3	blue	130.88	92.06	107.68	37.87	28.96	55.38	41.44	38.59	25.05	26.5	22.39	48.34	46.54	25.02	25.02
LRWT_f5p0_1751_transcript36795_g1	blue	68.82	80.39	54.44	23.87	25.51	21.27	29.75	26.92	20.85	74.73	75.05	57.58	42.13	34.8	34.8
LRWT_f3p0_1543_transcript44444_g1	blue	170.93	176.86	160.67	155.45	123.14	99.99	99.53	113.05	111.66	110.41	133.16	95.91	130.63	100.86	100.86
LRWT_f28p0_770_transcript76243_g1	blue	113.3	99.12	106.62	47.85	50.97	45.38	57.38	67.8	30.19	69.58	98.09	80.58	49.84	43.9	43.9
LRWT_f15p0_842_transcript70589_g1	blue	44.51	88.52	138.36	8.76	7.94	3.44	5.77	6.51	3.3	25.1	47.86	19.69	19.99	21.29	21.29
LRWT_f39p0_1148_transcript58006_g1	blue	201.22	212.62	214.7	206.5	199.85	209.7	172.28	181.93	166.05	216.42	225.42	208.14	189.72	167.27	167.27
LRWT_f7p0_1680_transcript38149_g1	blue	151.26	178.65	130.45	64.77	80	90.9	102.2	101.1	109.43	144.05	115.67	135.85	96.94	102.09	102.09
LRWT_f2p0_565_transcript87272_g11	blue	51.42	37.68	61.89	1.72	16.95	11.46	25.7	25.28	26.1	21.65	24.26	38.18	9.6	6.52	6.52
LRWT_f10p0_1105_transcript59354_g1	blue	78.41	62.38	59.72	50.78	77.85	59.29	67.54	78.29	20.47	45.71	43.31	51.44	34.82	38.03	38.03
LRWT_f8p0_2274_transcript23870_g1	blue	59.59	53.22	62.62	16.81	19.84	23.07	35.69	33.9	24.56	39.01	47.3	45.62	20.54	18.74	18.74
LRWT_f2p0_1884_transcript33390_g9	blue	36.48	63.04	24.34	2.92	50.09	34.62	37.13	1.83	19.48	38.64	32.83	82.58	29.88	1.66	1.66
LRWT_f2p0_2046_transcript29023_g4	blue	177.14	113.6	149.52	30.09	35.52	8.32	39.3	38.17	28.43	103.39	157.37	52.64	58.36	38.04	38.04
LRWT_f3p0_215_transcript106937_g5	blue	36.62	20.52	53.21	0	12.31	34.49	0	0	15.77	0	16.4	18.43	13.29	0	0
LRWT_f3p0_819_transcript73469_g3	blue	181.24	188.2	156.42	138.79	119.22	133.41	121.57	114.87	123.77	144.31	179.03	147.16	135.48	157.6	157.6
LRWT_f5p0_457_transcript93022_g4	blue	82.7	84.5	84.5	81.37	48.48	57.74	51.05	52.42	44.71	49.14	76.06	65.28	71.57	62.41	62.41
LRWT_f2p0_983_transcript66436_g8	blue	87.11	55.46	61.4	23.85	27.74	55.19	48.69	21.81	32.17	38.31	40.99	42.15	89	28.34	28.34
LRWT_f4p0_746_transcript77356_g4	blue	100.04	92.92	87.66	63.54	87.09	76.78	72.11	42.24	55.76	37.87	62.86	81.28	61.29	55.97	55.97
LRWT_f8p0_1307_transcript53220_g1	blue	44.24	78.3	45.29	28.07	56.31	31.07	38.57	13.9	18.78	9.44	51.76	19.05	17.66	15	15
LRWT_f7p0_1448_transcript47556_g2	blue	84.59	93.67	84.35	38	76.83	38.35	55.08	49.17	60.85	43.83	57.9	51.03	33.84	32.08	32.08
LRWT_f2p0_981_transcript66547_g12	blue	93.2	139.3	106.12	41.62	30.48	37.65	25.19	27.34	29.57	69.78	78.8	65.68	30.72	40.35	40.35
LRWT_f15p0_1033_transcript63376_g1	blue	37.53	83.08	125.37	61.79	48.37	24.34	60.1	29.31	32.96	96.66	73.76	64.33	55.62	60.82	60.82
LRWT_f27p0_825_transcript72420_g1	blue	113.17	106.84	108.46	126.52	99.35	79.43	91.65	95.46	75.42	82.6	109.29	90.25	121.3	94.93	94.93
LRWT_f6p0_766_transcript76766_g3	blue	85.71	47.24	104.8	13.67	11.97	12.3	24.51	4.92	13.18	7.99	36.79	3.62	42.68	23.94	23.94
LRWT_f8p0_1921_transcript31191_g1	blue	45.22	85.41	110.31	71.87	71.11	73.46	67.19	69.17	88.42	84.66	117.94	79.29	68.81	45.76	45.76
LRWT_f15p0_446_transcript92064_g1	blue	70.84	75.29	51.36	51.41	45.08	22.66	18.93	14.71	10.67	27.05	56.61	45.26	34.02	39.83	39.83
LRWT_f3p0_1197_transcript57956_g6	blue	42.42	35.36	38.99	19.53	18.35	19.71	17.35	36.71	19.49	62.46	47.5	21.13	55.02	32.48	32.48
LRWT_f3p0_1328_transcript51868_g1	blue	4.46	89.38	30.28	34.41	19.71	30.49	21.67	7.16	6.53	36.65	18.61	101.4	45.95	19.17	19.17
LRWT_f12p0_840_transcript69280_g1	blue	129.34	140.63	137.61	120.46	92.54	90.62	101.53	113.16	93.36	97.3	119.65	110.79	92.74	109.95	109.95
LRWT_f4p0_506_transcript89247_g3	blue	102.46	94.43	54.21	53.61	72.57	36.87	39.77	48.52	41.56	36.87	41.18	64.82	59.15	58.56	58.56
LRWT_f22p0_1822_transcript33566_g1	blue	125.78	107.85	107.9	73.66	69.92	78.29	81.02	78.14	79.77	58.25	66.87	69.95	125.12	92.41	92.41
LRWT_f8p0_1193_transcript56594_g1	blue	165.25	160.87	163.56	106.39	111.7	100.36	99.04	98.54	89.57	133.57	156.37	126.23	111.15	110.92	110.92
LRWT_f78p0_2008_transcript27895_g1	blue	114.31	115.35	112.93	86.46	89.83	102.96	92.57	79.94	89.47	92.53	106.29	92.6	72.01	71.53	71.53
LRWT_f2p0_1535_transcript43328_g2	blue	107.83	95.65	97.5	69.24	77.8	58.39	82.66	71.31	69.43	97.89	85.32	71.76	101.42	93.88	93.88
LRWT_f8p0_936_transcript67283_g1	blue	128.97	129.45	128.84	66.04	80.22	73.83	86.4	83.26	96.63	64.44	69.37	61.47	90.22	96.27	96.27
LRWT_f5p0_653_transcript82244_g3	blue	129.63	145.13	159.9	75.9	55.03	56.32	39.42	51.01	49.41	76.23	77.06	59	53.22	43.75	43.75
LRWT_f2p0_1682_transcript39709_g16	blue	63.86	96.7	78.31	45.04	65.92	46.98	38.97	50.37	55.86	56.36	69.28	68.39	38.74	41.92	41.92
LRWT_f4p0_2170_transcript26277_g1	blue	65.8	50.28	62.99	52.04	50.78	47.28	39.88	37.76	34.09	59.17	70.32	62.81	42.22	29.46	29.46
LRWT_f4p0_1949_transcript30802_g1	blue	99.36	88	48.71	43.01	151.67	41.81	61.72	46.36	114.68	69.22	54.33	65.12	43.22	41.06	41.06
LRWT_f2p0_1531_transcript44919_g14	blue	0.19	24.09	24.31	11.96	1.84	12.87	31.47	0.36	30.65	54.14	45.67	51.18	0.15	4.28	4.28
LRWT_f3p0_2680_transcript17070_g2	blue	63.12	67.92	59.25	46.76	67.17	58.75	64.23	42.05	37.58	66.33	90	84.93	39.14	33.99	33.99
LRWT_f5p0_1977_transcript30037_g2	blue	35.38	24.25	30.39	8.58	15.35	16.32	22.67	7.26	24.53	36.37	21.25	35.77	8.59	8.77	8.77
LRWT_f4p0_1108_transcript61148_g3	blue	95.34	67.92	50.21	15.6	14.05	12.38	9.43	30.38	37.93	47.21	44.75	39.33	31.07	34.75	34.75
LRWT_f2p0_1260_transcript55185_g3	blue	53.5	80.63	62.65	27.78	40.12	12.51	42.95	24.71	39.02	26.18	21.23	40.19	45.5	46.38	46.38
LRWT_f2p0_1686_transcript39513_g6	blue	165.67	175.63	166.43	172.03	178.06	164.06	137.07	157.76	148.33	204.87	190.65	198.03	157.2	150.7	150.7
LRWT_f29p0_1131_transcript59218_g2	blue	86.06	137.72	87.59	39.24	99.35	110.25	82.56	80.29	89.07	118.63	111.75	120.46	72.17	75.24	75.24
LRWT_f4p0_2445_transcript21089_g2	blue	116.39	99.57	104.07	95.18	99.82	97.67	87.48	100.4	107.47	114.3	121.58	113.05	85.63	80.63	80.63
LRWT_f3p0_462_transcript92992_g10	blue	43.98	55.37	67.98	38.82	35.13	26.44	21.1	30.11	33.51	79.85	58.3	86.06	47.46	50.31	50.31
LRWT_f7p0_832_transcript73043_g2	blue	38.45	27.56	58.42	17.74	22.8	38.23	16.26	27.78	55.22	44.06	45.87	48.22	19.14	31.74	31.74
LRWT_f3p0_935_transcript68570_g2	blue	134.23	148.3	254.56	61.67	56.85	53.57	59.55	72.51	47.24	32.5	42.49	45.12	57.19	61.28	61.28
LRWT_f2p0_1072_transcript62627_g3	blue	150.03	187.98	163.7	144.67	138.51	133.2	122.2	129.77	151.41	178.12	155.6	177.12	145.43	155.85	155.85
LRWT_f5p0_515_transcript89167_g3	blue	29.56	44.28	35.71	30.06	23.44	8.62	6.89	17.73	6.72	28.75	39.2	18.37	31.07	6.3	6.3
LRWT_f2p0_2591_transcript19155_g2	blue	104.87	93.15	95.68	70.69	74.52	91.06	83.42	72.39	77.97	108.87	92.55	100.85	67.41	68.43	68.43
LRWT_f2p0_2093_transcript29876_g9	blue	55.4	48.11	72.55	5.75	7.6	4.13	3.37	14.18	4.25	82.66	46.17	60.15	25.83	16.39	16.39
LRWT_f19p0_1235_transcript53644_g1	blue	76.38	97.59	67.11	37.44	55.06	53.12	76.48	73.36	44.54	57.25	65.83	45.21	26.74	57.41	57.41
LRWT_f17p0_1622_transcript39916_g1	blue	69.54	68.31	67.8	66.77	65.42	71.5	57.26	52.93	48.23	84.91	88.45	78.96	53.63	49.63	49.63
LRWT_f2p0_783_transcript75895_g14	blue	179.54	166.79	189.04	110.5	112.51	80.76	84.14	100.34	73.91	98.78	84.19	99.2	99.96	102.57	102.57
LRWT_f17p0_1311_transcript52470_g1	blue	110.88	88.39	87.68	23.08	28.49	40.66	44.6	35.69	40.06	97.45	68.18	79.6	28.61	35.21	35.21
LRWT_f9p0_1858_transcript32999_g1	blue	67.53	69.84	68.08	45.6	39.27	40.99	46.14	33.85	45.17	67.59	72.82	58.29	44.27	58.75	58.75
LRWT_f13p0_3833_transcript5404_g2	blue	165.34	133.71	127.96	94.44	119.4	107.27	99.56	122.47	127.54	119.57	106.41	123.32	116.89	69.31	69.31
LRWT_f2p0_1764_transcript36762_g4	blue	50.64	18.34	20.14	23.2	25.86	26.76	42.28	24.7	34.12	39.75	43.74	37.99	10.9	12.49	12.49
LRWT_f9p0_792_transcript74243_g1	blue	92.26	77.02	55.25	23.89	27.42	19.35	18.74	39.54	26.38	44.89	44.95	29.74	33.14	44.52	44.52
LRWT_f2p0_1758_transcript37099_g10	blue	32.26	45.35	24.8	12.57	10.66	24.77	35.34	5.39	20.24	22.37	53.77	71.03	9.43	10.26	10.26
LRWT_f69p0_1178_transcript56430_g1	blue	159.53	178.04	172.39	153.63	138.75	118.47	122.62	132.82	110.18	131.92	144.62	148.42	120.73	123.57	123.57
LRWT_f25p0_756_transcript76067_g2	blue	103.2	125.24	107.59	97.56	91.69	82.41	79.83	69.34	70.15	92.83	103.52	101.46	85.5	110.21	110.21
LRWT_f2p0_1522_transcript45248_g4	blue	142.49	124.69	104.5	80.54	75.17	68.49	74.34	72.28	80.96	110.64	121.57	112.59	52.85	70.36	70.36
LRWT_f2p0_1249_transcript55680_g12	blue	69.02	73.95	51.2	10.07	18.3	26.86	20.51	38.15	5.93	22.11	36.18	36.01	13.68	21.41	21.41
LRWT_f2p0_2723_transcript17020_g1	blue	68.66	74.09	61.93	26.92	36.86	33.34	28.07	36.62	24.04	62.11	56.16	47.13	51.3	44.13	44.13
LRWT_f2p0_1524_transcript45141_g4	blue	35.43	30.83	20.32	3.5	7.72	5.77	6.83	8.75	38.71	6.38	24.77	29.64	7.62	19.74	19.74
LRWT_f4p0_1915_transcript32389_g2	blue	105.73	74.3	76.18	44.2	77.42	88.2	126.92	82.11	72.42	96.2	82.2	72.59	48.95	39.68	39.68
LRWT_f3p0_3357_transcript9403_g2	blue	82.65	74.31	82.01	68.96	56.95	69.77	64.4	55.51	54.17	75.01	76.68	75.03	46.15	38.87	38.87
LRWT_f4p0_1669_transcript39979_g2	blue	120.61	144.58	127.24	33.58	23.69	30.9	46.8	32.31	1.49	40.59	38.66	30.33	98.7	52.59	52.59
LRWT_f5p0_1149_transcript58650_g1	blue	41.43	59.27	45.61	17.61	22.61	13.46	65.92	23.28	34.6	47.44	43.26	52.76	15.09	23.87	23.87
LRWT_f4p0_1068_transcript62635_g4	blue	51.82	66.99	27.64	53	21.73	33.87	28.83	54.15	33.72	59.59	29.76	19.24	48.19	26.74	26.74
LRWT_f3p0_1747_transcript37488_g4	blue	40.69	57.93	45.68	23.37	25.1	13.14	45.29	23.72	53.51	20.78	64.25	51.69	16.28	20.9	20.9
LRWT_f9p0_1961_transcript30361_g1	blue	106.07	103.33	91.58	46.76	67.18	55.93	57.74	69.95	56.79	69.68	88.64	76.43	72.36	63.04	63.04
LRWT_f16p0_2037_transcript27963_g1	blue	73.56	56.03	52.56	21.22	32.75	29.11	24.25	47.96	24.92	54.02	42.87	36.57	19.82	20.81	20.81
LRWT_f2p0_1076_transcript60153_g1	blue	69.45	66.85	53.63	31.04	45.75	26.24	44.21	34.89	34.37	50.77	46.68	56.15	26.61	28.56	28.56
LRWT_f4p0_1230_transcript55951_g2	blue	21.94	52.55	71.05	19.66	18.77	27.94	10.02	101.55	110.42	9.4	18.26	27.55	22.43	7.15	7.15
LRWT_f5p0_519_transcript89371_g3	blue	12.08	42.8	86.59	16.68	0.49	10.28	32.84	4.21	33.99	29.99	41.42	22.07	22.83	7.15	7.15
LRWT_f3p0_2384_transcript21337_g1	blue	42.5	36.04	10.6	17.62	17.89	10.52	32.28	5.6	16.88	53.46	43.24	10.83	4.96	4.57	4.57
LRWT_f5p0_538_transcript86788_g1	blue	112.91	104.21	99.14	12	9.37	7.28	44.72	13.96	17.22	30.37	24.59	20.6	25.87	35.31	35.31
LRWT_f2p0_1426_transcript48750_g7	blue	54.04	70.93	41.11	68.61	44.28	37.01	28.52	24.23	25.73	24.87	51	30.05	56.32	37.54	37.54
LRWT_f3p0_2178_transcript26281_g1	blue	130.41	106.08	112.8	83.84	82.46	95.32	133.58	86.82	86.23	106.16	120.86	117.86	106.39	100.58	100.58
LRWT_f4p0_3032_transcript13061_g1	blue	81.63	49.65	26.99	8.17	19.7	44.45	22.11	21.76	35.25	47.76	60.29	35.98	33.55	44.03	44.03
LRWT_f5p0_604_transcript85061_g1	blue	98.01	66.72	130.2	22.52	26.23	31.13	48.13	28.73	19.35	8.08	45.57	11.35	30.58	32.94	32.94
LRWT_f2p0_2695_transcript17336_g2	blue	80.94	60.42	56.01	33.84	50.47	47.63	75.8	38.72	63.37	46.64	62.11	61.05	31.39	37.09	37.09
LRWT_f2p0_442_transcript93957_g9	blue	71.62	119.89	97.14	63.58	34.43	44.31	36.69	55.09	8.75	42.09	51.44	46.16	47.45	27.76	27.76
LRWT_f5p0_1003_transcript65503_g5	blue	17.15	30.1	46.05	18.63	6.68	13.44	5.46	4.24	0.19	87.1	16.27	20.15	16.74	32.69	32.69
LRWT_f12p0_1204_transcript55614_g1	blue	47.29	45	32.1	36.61	20.78	36.13	32.44	44.45	30.37	41.32	38.31	17.42	20.2	15.44	15.44
LRWT_f4p0_1732_transcript37767_g5	blue	69.85	67.07	66.67	40.66	58.25	31.78	50.8	69.91	39.19	86.93	66.47	67.67	40.09	37.58	37.58
LRWT_f3p0_1301_transcript51327_g1	blue	33.07	16.76	30.29	1.66	12.41	21.91	28.43	19.83	2.31	27.77	2.53	37.24	5.55	5.11	5.11
LRWT_f4p0_1829_transcript32228_g1	blue	174.32	174.85	174.95	74.45	132.19	93.71	115.31	124.26	104.68	106.98	122.26	112.62	97.05	106.32	106.32
LRWT_f2p0_797_transcript75036_g13	blue	67.06	69.65	55.43	29.53	54.02	61.33	71.91	56.78	31.99	53.79	65.11	44.38	74.91	38.67	38.67
LRWT_f69p0_1218_transcript54273_g1	blue	106.96	28.83	27.5	6.59	12.41	21.42	25.18	37.34	46.8	55.91	61.64	86.79	33.61	17.22	17.22
LRWT_f3p0_4710_transcript2026_g1	blue	67.62	30.58	49.43	26.04	37.36	39.5	37.63	28.93	40.81	50.87	58.8	51.58	29.13	16.66	16.66
LRWT_f9p0_3154_transcript11192_g1	blue	161.36	142.03	96.91	114.18	87.12	90.56	71.48	93.91	88.16	135.21	126.38	105.5	63.21	82.45	82.45
LRWT_f2p0_1740_transcript37165_g3	blue	37.57	38.36	31.2	20.81	20.44	17.04	18.41	14.36	34.1	64.19	41.78	59.25	22.51	34.8	34.8
LRWT_f15p0_2255_transcript22521_g1	blue	89.92	80.93	73.63	48.72	63.57	59.84	48.27	52.03	46.49	60.79	83.4	74.15	44.55	48.35	48.35
LRWT_f5p0_799_transcript74888_g3	blue	56	109.55	70.36	55.54	44.53	65.27	34.97	22.39	31.93	42.25	41.02	90.49	32.07	30.71	30.71
LRWT_f12p0_2213_transcript24909_g1	blue	55.69	69.71	67.22	68.47	78.37	54	59.39	43.12	75.11	121.3	76.85	111.39	40.33	43.72	43.72
LRWT_f6p0_794_transcript74739_g1	blue	91.44	75.83	54.28	21.55	20.97	18.58	15.44	34.68	28.58	40.18	57.28	44.54	30.96	33.04	33.04
LRWT_f6p0_1316_transcript52405_g1	blue	65.78	24.85	46.02	50.04	21.81	41.53	24.88	33.64	12.2	43.48	47.34	22.85	49.32	34.34	34.34
LRWT_f2p0_2652_transcript18151_g2	blue	25.85	29.63	59.99	21.85	49.04	18.18	26.29	32.44	27.72	69.04	49.52	46.46	31.62	8.6	8.6
LRWT_f6p0_1433_transcript48224_g1	blue	71.56	88.95	87.98	42.77	70.35	60.64	63.84	65	75.39	90.07	84.37	80.88	51.28	58.92	58.92
LRWT_f2p0_1709_transcript38776_g6	blue	66.17	50.51	59.75	33.25	18.89	8.33	30.3	6.51	7.11	7.47	47.24	16.95	28.36	11.74	11.74
LRWT_f3p0_1063_transcript62681_g3	blue	47.18	38.32	10.53	14.01	12.34	25.6	22.99	21.95	34.6	29.51	41.36	7.04	12.92	9.7	9.7
LRWT_f2p0_1676_transcript39869_g6	blue	80.76	54.84	74.53	15.71	20.08	16.01	7.8	18.78	10.16	38.86	36.22	26.38	8.02	24.82	24.82
LRWT_f3p0_1193_transcript57623_g2	blue	78	163.1	24.41	12.88	53.91	6.89	3.38	5.56	7.65	75.96	20.84	18.39	29.58	19.04	19.04
LRWT_f11p0_2149_transcript24677_g1	blue	95.18	113.04	113.27	74.24	86.55	70.81	92.85	103.43	106.56	156.37	116.57	137.63	94.38	115.22	115.22
LRWT_f6p0_2402_transcript21988_g1	blue	133.49	106.91	124.75	52.08	69.35	67.81	75.66	84.7	79.61	82.7	85.06	82.17	65.3	68.23	68.23
LRWT_f17p0_1959_transcript30807_g1	blue	43.45	44.25	57.07	16.12	20.2	21.88	34.4	65.59	39.76	43.91	22.72	27.49	12.82	27.03	27.03
LRWT_f3p0_883_transcript70872_g1	blue	107.1	81.83	71.65	20.2	21.49	15.02	14.54	29.58	26.37	57.22	69.62	64.42	21.95	18.53	18.53
LRWT_f5p0_1780_transcript36291_g1	blue	64.3	53.95	56.81	46.42	55.46	52.95	44.47	39.87	45.69	71.55	69.18	64.33	39.54	38.26	38.26
LRWT_f9p0_1182_transcript56161_g1	blue	65.47	39.52	73.76	55.81	20.84	42.94	27.94	13.9	55.65	34.37	77.4	48.23	1.39	45.69	45.69
LRWT_f38p0_1428_transcript47322_g1	blue	95.79	97.29	95.62	107.58	70.2	91.18	76.37	72.76	87.67	129.98	76.6	88.98	67.09	66.37	66.37
LRWT_f4p0_1011_transcript65046_g3	blue	44.73	57.22	32.16	34.97	35.25	22.44	22.37	23.8	34.05	70.5	45.3	15.99	41.86	19.01	19.01
LRWT_f3p0_2213_transcript25615_g2	blue	65.52	71.5	46.31	27.15	19.51	17.08	26.11	25.8	23.16	53.68	43.3	0	23.5	38.38	38.38
LRWT_f19p0_869_transcript69130_g1	blue	91.71	100.07	109.94	97.22	76.52	89.1	73.82	76.34	68.05	86	102.36	90.95	81.47	72.33	72.33
LRWT_f3p0_2795_transcript15466_g1	blue	72.8	85.15	69	28.45	41.3	34.88	52.33	46.1	45.81	58.68	71.87	62.91	35.98	41.08	41.08
LRWT_f4p0_1268_transcript52164_g1	blue	90.23	82.62	94.99	33.46	27.73	35.06	33.24	33.19	32.92	40.59	58.98	47.52	22.26	22.15	22.15
LRWT_f26p0_1682_transcript39234_g1	blue	106.41	99.19	89.02	142.24	95.31	74.05	69.9	85.05	65.86	75.11	96.22	77.98	94.11	70.92	70.92
LRWT_f17p0_1408_transcript48331_g2	blue	115.28	46.67	87.34	19.92	41.59	30.46	43.13	26.54	31.96	40.83	62.84	60.51	32.53	49.82	49.82
LRWT_f17p0_486_transcript90226_g1	blue	49.71	67.5	32.17	25.39	6.25	21.12	7.09	7.81	69.77	32.88	17.4	10.34	12.51	3.64	3.64
LRWT_f23p0_1981_transcript29198_g1	blue	216.63	174.15	178.91	95.62	106.73	129.31	82.79	96.46	118.03	115.26	138.97	99.3	106.75	96.05	96.05
LRWT_f13p0_1434_transcript47766_g1	blue	172.8	144.4	140.7	161.62	134.28	118.3	179.13	141.34	153.54	224.32	202.73	240.74	144.61	133.49	133.49
LRWT_f3p0_1953_transcript31732_g2	blue	95.12	92.33	92.05	56.82	62.51	59.54	87.71	85.45	77.91	73.62	72.36	75.99	66.96	66.51	66.51
LRWT_f6p0_1125_transcript59574_g2	blue	206.01	241.18	222.97	206.06	204.66	206.22	154.89	136.69	149.33	180.21	209.18	197.5	186.4	188.74	188.74
LRWT_f7p0_908_transcript69418_g4	blue	38.07	74.31	44.71	17.98	99.2	50.79	34.76	32.92	96.08	47.43	39.24	54.83	28.3	28.18	28.18
LRWT_f3p0_2475_transcript20975_g2	blue	42.72	50.04	23.7	8.95	11.16	12.5	36.29	10.02	26.87	29.49	3.52	4.31	11.59	0.54	0.54
LRWT_f3p0_3673_transcript6589_g3	blue	46.83	29.31	46.05	18.29	32.02	25.74	27.49	43.62	42.55	46.37	30.87	58.45	25.44	19.86	19.86
LRWT_f3p0_1277_transcript54711_g6	blue	75.51	98.94	96.59	68.7	51.91	59.77	61.81	58.39	65.18	74.93	96.17	78.54	83.55	86.49	86.49
LRWT_f2p0_1551_transcript44239_g8	blue	21.67	71.96	23.71	17.9	12.8	4.24	17.67	24.2	12.57	44.95	5.45	48.94	57.09	27	27
LRWT_f4p0_1503_transcript43720_g1	blue	53.51	53.7	44.15	20.69	27.99	27.88	31.84	27.83	35.84	42.72	34.96	39.1	17.34	20.25	20.25
LRWT_f139p0_3170_transcript9600_g1	blue	39.37	31.94	43.3	25.02	32.38	35.7	27.71	18.64	44.18	45.12	44.78	43.24	24.24	11.17	11.17
LRWT_f2p0_1191_transcript58025_g3	blue	54.65	65.14	48.65	30.27	34	26.22	23.11	22.3	23.18	43.77	50.97	46.5	36.87	32.18	32.18
LRWT_f2p0_1295_transcript53807_g6	blue	153.18	154.99	137.46	94.48	91.91	91.09	92.02	76.8	83.86	85.93	118.37	96.75	112.71	101.97	101.97
LRWT_f2p0_3108_transcript12226_g4	blue	74.36	22.63	43.88	6.65	33.07	27.18	33.39	27.38	44.73	70.29	37.28	16.18	39.32	21.98	21.98
LRWT_f3p0_1183_transcript57984_g2	blue	201.66	210.38	178.02	166.87	161.45	168.16	143.98	161.67	155.55	196.72	199.27	169.85	165.61	180.63	180.63
LRWT_f2p0_1890_transcript33128_g7	blue	64.59	53.69	58.82	16.78	27.54	18.1	55.66	24.16	19.76	41.18	45.16	34.62	22.19	16.79	16.79
LRWT_f48p0_2715_transcript14819_g1	blue	42.64	47.31	68.94	9.61	26.16	14.24	21.29	14.5	11.78	28.19	40.73	32.44	16.21	10.54	10.54
LRWT_f3p0_1859_transcript34708_g6	blue	47.79	98.8	106.89	56.48	64.29	47.24	72.28	53.55	59.16	97.04	76.57	40.46	64.22	74.47	74.47
LRWT_f3p0_2763_transcript16890_g2	blue	77.51	73.99	83.14	36.38	72.96	64.2	64.66	46.55	73.47	69.52	75.39	57.18	43.33	41.85	41.85
LRWT_f6p0_708_transcript79096_g2	blue	42	95.31	43.91	37.46	46.27	19.4	19.42	40.4	7.04	47.49	25	23.96	19.74	33.22	33.22
LRWT_f7p0_557_transcript87205_g2	blue	83.13	142.89	120.21	26.73	18.4	33.42	25.15	18.94	20.86	49.89	39.98	35.42	24.79	38.04	38.04
LRWT_f2p0_1845_transcript34450_g10	blue	46.75	34.01	40.9	9.59	17.76	23.36	16.06	12.74	25.66	41.11	54.68	58.99	19.76	14.22	14.22
LRWT_f39p0_3553_transcript6654_g1	blue	52.55	25.49	50.09	26.91	44.54	33.09	44.78	29.63	39.15	52	51.98	38.28	38.9	28.28	28.28
LRWT_f5p0_1760_transcript35139_g1	blue	39.38	44.42	21.07	31.15	28.65	19.54	35.73	22.71	18.03	40.5	28.52	57.4	44.81	9.82	9.82
LRWT_f7p0_1619_transcript41553_g3	blue	72.13	51.24	67.18	51.21	46.12	50.57	24.5	24.35	56.2	88.84	84.24	62.87	40.59	47.17	47.17
LRWT_f4p0_1219_transcript56750_g7	blue	104.23	139.28	133.57	121.02	95.91	108.24	130.92	113.84	115.99	134.23	116.7	105.38	132.05	110.63	110.63
LRWT_f2p0_888_transcript70718_g14	blue	114.97	115.9	91.93	24.43	23.57	23.44	51.25	37.81	35.44	28.68	40.86	33.05	46.24	51.45	51.45
LRWT_f7p0_2841_transcript14889_g1	blue	121.11	89.76	113.58	45.06	83.77	90.7	81.63	53.47	93.41	91.58	123.38	36.94	88.72	78.17	78.17
LRWT_f3p0_2784_transcript16243_g5	blue	58.19	14.32	22.04	21.8	12.39	42.77	36.3	32.56	26.6	2.78	43.65	45.16	10.17	13.31	13.31
LRWT_f2p0_3512_transcript7857_g1	blue	19.25	53.74	32.15	37.29	33.08	16.59	23.76	39.24	34.39	48.36	50.13	43.59	17.48	22.56	22.56
LRWT_f4p0_676_transcript79967_g4	blue	51.21	90.93	85.8	57.52	48.2	48.53	24.81	35.8	21.51	59.05	79.99	71.41	39.56	43.04	43.04
LRWT_f10p0_1403_transcript49030_g2	blue	135.39	101.85	89.34	73.24	95.24	88.18	122.37	86.26	109.09	98.35	139.48	111.89	38.01	98.58	98.58
LRWT_f50p0_1648_transcript36865_g1	blue	96.17	83.02	70.07	47.66	53.03	58.01	62.87	52.53	69.47	64.64	55.78	75.16	58.17	46.35	46.35
LRWT_f5p0_742_transcript76910_g2	blue	50.1	65.65	80.36	41.39	26.63	46.95	60.34	36.44	16.21	19.86	23.62	30.28	46.62	27.19	27.19
LRWT_f17p0_1687_transcript38609_g2	blue	46.13	34.85	50	25.12	22.2	24.36	32.45	42.52	46.3	52.02	42.19	56.33	22.1	26.88	26.88
LRWT_f3p0_1176_transcript57124_g2	blue	36.5	32.46	25.04	15.42	10.84	10.71	21.33	39.76	11.06	27.16	25.62	22.99	5.51	4.64	4.64
LRWT_f3p0_2895_transcript14800_g2	blue	35.99	18.49	21.14	11.77	14.55	22.2	31.61	20.27	25.9	77.11	34.14	31.7	8.34	7.36	7.36
LRWT_f17p0_1135_transcript59196_g1	blue	48.5	44.96	53.27	16.21	12.08	12.68	25.84	18.5	19.88	45.61	62.49	46.7	23.15	19.24	19.24
LRWT_f2p0_785_transcript74873_g1	blue	39.85	46.61	50.28	24.81	22.91	17.73	11.62	11.99	12.41	29.4	43.91	22.33	34.04	39.21	39.21
LRWT_f2p0_821_transcript73801_g6	blue	65.32	57.58	44.92	33.5	20.69	18.47	10.68	17.29	7.39	20.04	38.89	16.15	37.21	21.13	21.13
LRWT_f2p0_4892_transcript1645_g1	blue	54.61	34.56	68.02	42.45	46.82	61.59	43.53	42.57	52.23	59.34	44.17	59.86	21.07	14.32	14.32
LRWT_f7p0_715_transcript78891_g1	blue	114.11	0.39	0	29.14	16.52	10.42	0	0	18.52	46.04	1.18	89.01	14.59	0	0
LRWT_f3p0_2854_transcript15273_g6	blue	72.48	58.68	62.04	25.67	39.1	48.45	65.82	45.52	55.28	49.51	55.92	53.79	32.09	30.89	30.89
LRWT_f3p0_1787_transcript36095_g3	blue	56.3	42.99	52.14	22.91	36.66	27.19	34.25	32.32	28.48	33.31	54.63	51.52	12.44	17.63	17.63
LRWT_f2p0_580_transcript86431_g13	blue	40.58	57.47	33.87	13.79	6.45	11.29	7	12.01	6.3	53.6	27.1	38.91	14.8	17.39	17.39
LRWT_f3p0_655_transcript82433_g4	blue	137.64	125.94	92.2	38.85	37.43	37.16	26.13	46.94	37.16	57.15	50.9	41.73	49.23	55.47	55.47
LRWT_f5p0_1860_transcript34072_g3	blue	98.08	97.56	93.13	87.71	88.41	79.88	60.73	76.86	67.21	95.92	101.13	89.56	76.7	70.6	70.6
LRWT_f15p0_1307_transcript52294_g2	blue	56.6	28.95	34.63	39.86	39.32	25.61	49.33	29.49	55.71	49.34	53.93	64.39	34.66	22.91	22.91
LRWT_f8p0_1779_transcript32556_g1	blue	128.64	132.97	138.43	53.43	70.18	62.57	70.51	61.41	67.6	139.84	158.65	175.73	60.21	59.82	59.82
LRWT_f4p0_1962_transcript30726_g1	blue	82.06	97.45	126.26	26.52	49.91	47.29	56.15	40.69	56.78	51.05	64.09	42.6	51.82	37.73	37.73
LRWT_f73p0_1792_transcript34807_g1	blue	60.46	84.14	58.47	29.69	38.7	50.13	50.78	33.18	41.84	58.5	85.31	60.03	49.32	34.97	34.97
LRWT_f21p0_1757_transcript32798_g1	blue	31.29	36.92	34.83	12.58	19	11.47	25.16	15.8	22.9	31.95	38.89	31.1	8.63	9.54	9.54
LRWT_f2p0_670_transcript81557_g5	blue	41.89	34.09	53.02	31.34	36.05	39.16	16.76	29.95	12.41	13.81	18.82	13.58	9.19	8.52	8.52
LRWT_f6p0_2386_transcript22261_g1	blue	49.58	51	37.13	33.61	27.1	33.57	25.43	37.44	27.17	43.89	53.12	33.11	40.21	48.01	48.01
LRWT_f13p0_1274_transcript52218_g1	blue	62.75	63.11	64.72	41.37	50.6	54.6	43.41	46.13	43.2	63.59	63.15	66.82	42.45	40.34	40.34
LRWT_f6p0_488_transcript89493_g1	blue	30.68	49.62	29.62	21.31	22.51	16.68	18.52	22.32	10.66	32.58	76.84	63.39	8.16	5.51	5.51
LRWT_f2p0_1083_transcript62284_g12	blue	17.31	32.48	27.88	8.25	7.05	5.82	5.27	6.29	11.35	33.26	26.2	33.84	10.78	21.57	21.57
LRWT_f17p0_1200_transcript56185_g1	blue	39.55	29.98	27.64	22.49	17.39	12.54	20.05	40.2	35.8	33.79	39.61	39.46	23.59	17.19	17.19
LRWT_f3p0_1598_transcript42959_g4	blue	28.66	67.37	28.63	22.66	20.47	10.64	53.15	4.72	26.76	30.01	37	52.45	22.74	4.87	4.87
LRWT_f2p0_2635_transcript18455_g3	blue	109.52	85.24	88.03	49.35	58.58	65.29	87.7	57.62	66.72	65.49	75	74.34	96.05	76.2	76.2
LRWT_f2p0_2875_transcript15014_g6	blue	83.46	63.07	70.55	32.86	39.5	24.35	47.48	26.28	19.44	35.92	39.82	25.69	51.26	33.56	33.56
LRWT_f11p0_2359_transcript22814_g2	blue	38.58	37.9	4.93	15.71	18.98	13.01	14.3	29.18	23.93	55.25	29.88	49.57	6.61	10.69	10.69
LRWT_f4p0_2910_transcript14117_g2	blue	34.67	17.33	64.35	21.31	32.79	20.5	35.24	30.45	23.65	36.45	47.52	33.01	45.4	22.59	22.59
LRWT_f2p0_776_transcript76034_g1	blue	3.76	36.12	26.36	8.85	5.54	11.25	2.89	29.42	2.69	21.09	23.86	49.32	8.87	16.18	16.18
LRWT_f3p0_1448_transcript47938_g6	blue	48.51	64.32	44.88	23.66	39.08	16.03	22.13	33.3	12.7	38.3	34.75	45.74	34.72	25.26	25.26
LRWT_f2p0_804_transcript74624_g7	blue	78.85	66.98	94.23	50.62	57.22	63.06	60.76	40.67	31.77	40.2	49.25	37.8	59.54	48.06	48.06
LRWT_f3p0_1907_transcript32465_g5	blue	70.18	50.08	59.65	36.1	41.54	24.44	31.42	26.96	22.6	32.56	52.76	36.45	54.66	50.26	50.26
LRWT_f3p0_1215_transcript56368_g1	blue	78.19	76.74	34.7	15.99	22.15	30.68	41.88	62.9	33.97	36.12	52.87	47.04	25.12	36.93	36.93
LRWT_f2p0_427_transcript94786_g11	blue	42.81	42.9	52.31	24.18	25.6	14.09	44.26	0.42	9.58	5.67	20.37	34.19	34.19	19.01	19.01
LRWT_f3p0_1559_transcript43867_g3	blue	57.99	54.83	40.52	39.55	195.58	38.54	50.09	40.29	102.19	54.1	30.45	56.62	21.83	34.21	34.21
LRWT_f2p0_1788_transcript36080_g8	blue	52.2	39.75	55.52	40.67	38.45	49.47	40.81	35.66	58.32	71.3	68.91	64.02	34.02	30.74	30.74
LRWT_f3p0_1171_transcript58671_g2	blue	28.23	46.3	43.44	11.99	24.91	9.63	25.85	23.28	36.65	39.95	15.05	31.66	18.48	14.84	14.84
LRWT_f2p0_1887_transcript33324_g11	blue	46.58	55.62	36.41	14.33	18.61	9.36	13.13	12.27	9.17	44.76	32.47	32.07	19.24	19.41	19.41
LRWT_f2p0_1051_transcript63125_g2	blue	36.93	30.24	33.04	35.65	8.26	17.17	26.74	20.99	11.73	0.12	44.14	28.98	25.61	6.53	6.53
LRWT_f2p0_1679_transcript39441_g1	blue	77.77	77.16	88.72	68.52	79.87	88.69	92.84	76.77	64.6	87.78	116.1	85.68	70.46	56.66	56.66
LRWT_f3p0_920_transcript69926_g8	blue	50.6	49.13	45.42	29.24	28.47	31.52	60.05	24.15	30.33	30.77	55.55	48.38	74.66	40.64	40.64
LRWT_f5p0_1218_transcript56500_g1	blue	54.07	61.76	56.43	28.4	16.41	23.48	75.47	26.48	26.01	32.9	54.22	61.69	18.44	24.33	24.33
LRWT_f7p0_519_transcript89456_g2	blue	111.17	98.11	146.12	51.91	42.84	42.41	59.32	47.03	20.22	62.11	61.86	44.85	55.74	37.08	37.08
LRWT_f2p0_1198_transcript57760_g7	blue	25.71	41.34	33.96	9.15	22.1	7.5	41.61	17	24.44	34.39	28.29	32.5	10.05	10.52	10.52
LRWT_f2p0_2882_transcript15017_g7	blue	50.67	49.29	40.17	16.27	20.01	14.44	23.54	26.65	24.38	33.2	43.21	38.27	14.73	11.1	11.1
LRWT_f4p0_689_transcript80500_g5	blue	138.1	145.02	44.91	21.2	14.62	15.82	22.48	42.61	29.76	33.75	48.35	35.58	34.69	34.99	34.99
LRWT_f23p0_779_transcript75049_g1	blue	82.51	103.65	100.68	100.74	96.04	97.79	94.14	80.93	82.36	104.61	105.96	107.74	81.83	82.32	82.32
LRWT_f3p0_963_transcript67327_g4	blue	47.89	56.33	109.71	46.01	49.8	66.24	77.47	51.68	44.16	72.62	67.75	58.46	115.56	54.65	54.65
LRWT_f10p0_1495_transcript44841_g1	blue	95.62	95.78	95.17	72.62	73.23	79.09	66.59	63.24	64.31	80.82	90.89	88.5	78.6	70.75	70.75
LRWT_f2p0_1471_transcript47140_g9	blue	38.66	14.02	11.64	25.66	27.65	0.08	13.4	34.15	0.37	41.17	22.97	44.67	15.76	7.21	7.21
LRWT_f2p0_1106_transcript60832_g2	blue	9.22	14.78	29.77	4.62	19.71	5.61	22.25	10.97	20.84	4.88	36.14	40.7	33.24	1.37	1.37
LRWT_f2p0_940_transcript68310_g10	blue	54.04	22.66	57.89	35.84	66.37	37.7	31.34	41.63	44.84	36.93	67.14	73.18	35.71	27.81	27.81
LRWT_f4p0_1792_transcript34889_g2	blue	135.64	131.37	123.51	87.53	103.38	107.41	118.81	108.34	134.99	116.66	123.61	113.27	92.57	106.63	106.63
LRWT_f20p0_2517_transcript19144_g1	blue	44.22	45.75	40.47	18.1	21	11.14	19.91	13.85	21.89	34.98	23.56	38.8	12.08	9.65	9.65
LRWT_f2p0_883_transcript70350_g1	blue	172.44	189.34	152.49	109.13	99.27	85.08	85.4	109.1	109.01	117.83	114.64	110.45	106.56	93.56	93.56
LRWT_f9p0_1176_transcript58262_g1	blue	44.49	21.92	13.42	14.82	9.69	12.12	13.96	26.8	45.82	41.99	35.96	30.4	22.42	11.57	11.57
LRWT_f17p0_437_transcript88366_g1	blue	31.83	49.64	51.25	16.42	15.35	9.89	32.72	19.69	10.41	6.46	10.72	9.72	42.13	27.5	27.5
LRWT_f14p0_1200_transcript56671_g1	blue	125.81	88.39	46.51	8.83	13.78	13.09	11.02	35.08	40.08	20.07	30.47	55.28	20.69	16.13	16.13
LRWT_f33p0_2584_transcript17748_g1	blue	47.14	46.32	43.68	17.35	21.65	22.02	33.92	36.72	27.64	35.52	35.1	37.72	26.36	23.65	23.65
LRWT_f2p0_2699_transcript17471_g5	blue	119.54	101.31	105.83	19.44	28.64	33.99	40.08	38.38	35.95	56.37	54.04	55.65	31.09	35.75	35.75
LRWT_f10p0_801_transcript73367_g1	blue	70.38	62.99	77.62	24.3	20.99	23.07	34.16	30.93	26.44	27.9	35.7	30.78	34.03	45.41	45.41
LRWT_f23p0_2039_transcript28239_g1	blue	89.86	95.53	92.48	67.04	79.18	75.81	95.02	96.67	88.42	65.28	74.67	76.77	73.74	67.91	67.91
LRWT_f7p0_1394_transcript46420_g1	blue	68.84	84.03	68.99	42.19	40.97	43.95	48.66	51	56.82	66.12	65.2	64.36	47.06	51.91	51.91
LRWT_f2p0_1797_transcript35516_g3	blue	78.08	80.03	78.5	51.5	47.27	57.31	60.78	53.26	47.62	71.74	82.91	73.67	53.12	53.54	53.54
LRWT_f4p0_1639_transcript40054_g1	blue	104.54	125.93	122.8	52.35	60.48	56.73	66.42	58.92	71.87	128.58	104.55	112.29	65.03	59.81	59.81
LRWT_f3p0_1821_transcript35230_g3	blue	86.41	82.22	83.89	84.4	87.44	54.59	82.19	101.9	79.8	110.6	100.09	93.57	55.11	71.06	71.06
LRWT_f7p0_995_transcript65740_g4	blue	113.15	115.96	120.82	99.69	98.82	109.43	86.93	93.78	77.19	106.53	106.28	121.89	107.02	79.39	79.39
LRWT_f4p0_2418_transcript21406_g1	blue	37.45	45.83	29.46	0.16	14.75	10.93	11.74	9.59	4.76	26.33	34.94	20.68	6.63	16.66	16.66
LRWT_f5p0_747_transcript74555_g1	blue	51.94	32.3	55.88	34.85	22.23	17.28	26.91	14.53	22.4	13.27	35.94	14.86	38.02	25.19	25.19
LRWT_f2p0_1141_transcript60014_g13	blue	26.46	52.43	58.85	17.76	23.6	9.35	10.89	17.73	15.68	5.48	31.44	8.9	62.36	21.78	21.78
LRWT_f3p0_2746_transcript15850_g1	blue	14.76	23.57	35.06	7.89	12.87	12.04	39.05	7.09	39.46	27	27.21	34.19	14.73	5.11	5.11
LRWT_f27p0_1103_transcript59402_g1	blue	56.14	74.96	61.18	28.88	30.27	12.46	23.21	22.16	31.73	21.66	50.08	33.38	32.85	34.84	34.84
LRWT_f15p0_417_transcript94172_g1	blue	56.31	68.04	49.35	66.5	29.7	22.58	15.73	14.52	15.04	19.64	37.51	20.25	39.85	24.67	24.67
LRWT_f14p0_257_transcript102377_g1	blue	14.91	19.52	16.54	9.63	0	30.52	24.33	26.88	0	0	39.27	0	7.7	0	0
LRWT_f2p0_469_transcript92411_g3	blue	12.96	100.17	56.43	0.3	0	9.63	26.75	54.46	0	0	0	63.87	120.96	0	0
LRWT_f7p0_1277_transcript53955_g1	blue	78.18	86.75	78.22	52.2	63.37	62.64	58.07	71.12	96.14	79.11	71.18	80.73	51.06	58	58
LRWT_f2p0_1277_transcript54832_g15	blue	116.87	86.2	61.56	30.71	37.09	49.49	63.92	69.73	61.22	44.82	47.29	45.21	30.15	51.95	51.95
LRWT_f15p0_2002_transcript29543_g1	blue	75.4	92.41	78.36	53.25	60.96	61.92	58.61	48.52	51.98	43.95	58.89	64.88	49.01	47.63	47.63
LRWT_f2p0_1912_transcript32453_g3	blue	155.03	154.99	155.63	152.68	160.41	159.77	153.9	145.4	136.96	176.82	177.67	188.48	123.07	123.67	123.67
LRWT_f2p0_2232_transcript25444_g8	blue	59.77	84.29	76.85	45.94	48.68	65.57	66.39	53.03	60.54	92.11	82.13	96.38	59.29	50.95	50.95
LRWT_f6p0_1312_transcript50631_g1	blue	71.91	65.19	58.14	28.14	31.45	26.26	47.69	42.11	33.23	33.61	36.16	39.14	44.42	51.67	51.67
LRWT_f7p0_1040_transcript63040_g1	blue	71.36	78.95	75.67	53.84	51.92	54.76	50.3	52.33	54.22	66.34	72.84	66.13	65.35	74.94	74.94
LRWT_f2p0_1713_transcript38590_g4	blue	54.65	23.08	56.36	20.04	39.98	17.84	27.11	30.91	66.59	39.29	38.4	34.73	20.41	21.37	21.37
LRWT_f15p0_2266_transcript23974_g1	blue	78.63	76.78	77.02	62.49	66.93	61.76	67.98	63.8	63.61	76.45	78.47	73.04	57.26	46.79	46.79
LRWT_f8p0_1710_transcript37064_g1	blue	63.6	68.58	53.79	29.69	36.33	38.03	46.04	32.99	42.51	73.36	70.87	80.16	33.38	36.33	36.33
LRWT_f16p0_1417_transcript45479_g2	blue	62.16	48.74	38.58	43.32	28.16	24.22	32.5	18.31	21.57	21.69	35.83	35.07	33.54	22.99	22.99
LRWT_f10p0_951_transcript66994_g1	blue	128.55	140.78	125.12	103.52	129	113.65	110.22	142.94	124.58	171.04	138.02	161.97	120.05	138.51	138.51
LRWT_f19p0_511_transcript84970_g1	blue	45.74	55.24	45.04	63.9	42.48	43.39	35.34	35.39	25.54	60.09	58.62	56.43	42.95	49.57	49.57
LRWT_f71p0_2405_transcript19936_g1	blue	39.25	37.39	38.61	31.47	26.7	26.03	27.77	15.8	18.28	32.73	45.16	32.06	27.72	16.85	16.85
LRWT_f2p0_2828_transcript15631_g8	blue	52.95	11.11	50.33	31.29	12.43	17.19	4.57	59.48	4.58	47.46	3.46	55.79	5	14.05	14.05
LRWT_f22p0_5889_transcript619_g1	blue	110.51	81.27	88.09	54.46	82.51	73.04	91.57	79.11	89.41	89.95	96.05	95.36	59.55	48.36	48.36
LRWT_f3p0_2312_transcript23213_g1	blue	89.52	72.6	78.73	51.86	59.13	47.14	46.34	58.69	45.71	59.89	61.07	64.58	50.15	49.22	49.22
LRWT_f2p0_1303_transcript53604_g10	blue	67.35	62.68	64.15	32.04	36.6	35.28	37.3	34.11	38.46	54.17	53.47	55.13	47.52	43.55	43.55
LRWT_f2p0_610_transcript84825_g14	blue	69.54	54.11	54.92	32.84	44.53	27.86	40.95	15.59	7.1	28.81	24.47	31.53	50.74	26.12	26.12
LRWT_f2p0_1771_transcript37168_g9	blue	24.12	24.99	30.5	14.7	3.12	3.2	1.98	5.07	0.88	12.57	23.18	6.33	17.84	16.66	16.66
LRWT_f4p0_1040_transcript63901_g1	blue	78	81.83	40.42	17.07	15.73	15.07	13.66	34.9	28.21	46.79	46.87	37.78	47.26	37.87	37.87
LRWT_f2p0_2104_transcript27823_g9	blue	82.36	73.42	80.74	52.58	60.78	64.77	58.79	61.59	74.34	99.97	92.69	102.64	55.38	64.59	64.59
LRWT_f4p0_719_transcript78330_g1	blue	65.12	37.15	95.29	5.77	8.62	8.01	13.53	3.41	11.06	1.99	29.55	4.16	40.06	15.56	15.56
LRWT_f28p0_1887_transcript30370_g1	blue	118.35	134.98	97.84	15.06	22.46	24.05	28.41	27.64	20.16	47.58	59.12	56.57	31.61	29.52	29.52
LRWT_f2p0_3374_transcript9174_g6	blue	35.44	43.43	37.1	19.85	20.86	18.75	14.62	16.14	10.33	31.45	35.25	30.63	14.1	10.5	10.5
LRWT_f2p0_1093_transcript61844_g7	blue	33.76	52.7	58.24	19.9	20.74	6.38	24.43	16.44	33.42	62.27	56.77	56.06	12.85	16.77	16.77
LRWT_f2p0_800_transcript74196_g2	blue	66.07	29.5	111.49	13.81	16.25	13.14	31.52	5.75	13.57	6.38	38.47	6.42	59.76	22.44	22.44
LRWT_f31p0_2150_transcript25753_g1	blue	99.28	82.68	90.09	66.86	82.73	69.9	94.83	83.88	83.58	86.19	92.62	92.87	60.76	49.83	49.83
LRWT_f3p0_1722_transcript38506_g7	blue	55.27	59.32	57.22	25.54	42.42	41.57	50.32	42.09	51.78	42.49	52.41	51.83	29.93	40.08	40.08
LRWT_f2p0_2298_transcript23615_g1	blue	59.05	65.55	59.84	21.4	32.49	42.53	35.73	29.78	26.96	22.38	36.35	66.57	49.7	26.44	26.44
LRWT_f2p0_663_transcript81912_g5	blue	13.53	22.68	39.17	18.84	15.74	3.88	15.14	0.15	3.52	11.09	11.34	13.42	28.99	0.37	0.37
LRWT_f11p0_1204_transcript55738_g2	blue	77.08	85.81	86.16	60.73	47.3	55.09	45.84	38.46	30.76	56.53	75.71	59.42	40.1	49.41	49.41
LRWT_f7p0_2264_transcript24588_g1	blue	67.34	15.43	107.16	3.14	13.97	14.06	56.89	25.47	22.17	23.41	23.81	32.91	28.6	34.69	34.69
LRWT_f12p0_2077_transcript26676_g1	blue	33.79	41.15	30.81	18.72	34.84	24.64	28.71	8.24	16.53	7.31	17.13	39.22	29.89	9.42	9.42
LRWT_f5p0_1670_transcript39967_g6	blue	33.53	24.7	54.36	19.58	55.78	24.9	143.31	50.47	39.46	17.94	34.02	22.73	19.48	12.12	12.12
LRWT_f3p0_1791_transcript36123_g4	blue	158.46	169.41	155.59	133.31	127.42	122.74	109.21	102.05	119.14	140.49	162.41	127.05	117.94	119.43	119.43
LRWT_f17p0_1702_transcript37602_g2	blue	157.55	136.53	151.45	92.15	96.04	117.15	96.02	101.54	106.93	105.12	111.67	106.53	98.94	84.77	84.77
LRWT_f2p0_644_transcript82969_g10	blue	55.46	55.82	50.72	29.85	42.65	42.15	38.95	36.42	21.72	31.54	26.1	25.41	39.92	27.32	27.32
LRWT_f10p0_1110_transcript59983_g1	blue	23.8	37.3	40.19	26.8	30.27	19.02	37.46	17.57	52.67	26.64	33.32	23.18	13.02	7.8	7.8
LRWT_f6p0_2576_transcript18548_g1	blue	47.74	54.19	42.06	24.14	17.75	19.21	28.27	21.32	28.27	50.23	34.9	51.29	16.39	21.36	21.36
LRWT_f21p0_853_transcript70550_g1	blue	77.8	44	73.39	63.47	33.12	54.36	32.29	49.88	51.72	67.5	58.93	33.69	49.05	46.21	46.21
LRWT_f2p0_2772_transcript16631_g7	blue	62.93	36.11	46.98	24.21	44.23	36.99	57.13	44.05	60.81	48.66	53.27	55.09	36.96	24.72	24.72
LRWT_f4p0_1608_transcript41432_g1	blue	90.05	61.75	45.92	34.9	210.57	33.37	44.61	33.02	68.2	42.48	26.24	35.59	22.65	31.69	31.69
LRWT_f2p0_2120_transcript27467_g9	blue	144.47	122.48	130.9	86.53	84.24	75.37	81.08	76.66	77.59	95.55	102.59	98.61	93.49	84.19	84.19
LRWT_f2p0_1786_transcript35649_g2	blue	60.43	19.58	26.8	3.22	3.84	17.8	29.22	26.19	32.49	5.69	15.24	68.89	11.5	8.97	8.97
LRWT_f16p0_1833_transcript33101_g1	blue	64.48	68.07	66.52	55.7	57.1	48.3	47.48	46.7	54.16	76.84	68.81	72.3	47.76	46.67	46.67
LRWT_f7p0_1589_transcript42369_g1	blue	56.38	77.2	68.72	50.69	53.55	47.39	40.78	31.24	61.23	73.16	52.23	72.08	42.02	51.69	51.69
LRWT_f4p0_932_transcript68535_g3	blue	35.65	12.48	41.19	14.63	32.93	12.41	21.12	4.07	24.8	22.23	30.12	34.38	17.05	11.1	11.1
LRWT_f6p0_1279_transcript51921_g1	blue	39.47	41.59	32.17	16.03	15.55	17.25	19.14	15.85	17.89	39.34	34.8	41	22.88	25.03	25.03
LRWT_f6p0_758_transcript76990_g7	blue	43.94	48.04	43.66	26.9	25.57	28.19	27.02	22.26	26.62	45.99	41.64	37.01	25.61	39.05	39.05
LRWT_f9p0_1519_transcript45149_g1	blue	43.89	47.34	36.12	22.73	18.45	11.57	13.28	11.46	11.04	30.42	29.68	26.33	20.55	12.44	12.44
LRWT_f9p0_734_transcript77049_g2	blue	71.06	47.12	66.01	44	46.15	41.77	81.69	43.1	28.36	53.11	57.29	38.03	40.51	35.03	35.03
LRWT_f11p0_1979_transcript29374_g1	blue	287.13	305.05	289.75	247.53	275.61	286.81	302.19	282.05	278.16	304.96	293.23	287.52	292.25	256.42	256.42
LRWT_f3p0_2519_transcript20199_g1	blue	40.15	25.54	34.13	10.03	18.35	14.42	15.2	12.02	13.58	31.32	31.15	30.28	14.99	6.26	6.26
LRWT_f2p0_1240_transcript55966_g6	blue	63.24	64.83	51.65	21.65	23.93	14.81	22.97	42.25	20.36	35.48	38.32	43.55	26.54	26.35	26.35
LRWT_f3p0_1391_transcript50553_g6	blue	73.59	50.14	34.72	30.07	25.16	32.84	24.69	8.71	6.67	39	33.62	31.79	8.22	11.96	11.96
LRWT_f2p0_1929_transcript32104_g10	blue	67.63	63.74	65	54.23	53.9	51.71	45.27	42.5	49.26	63.84	62.3	61.16	44.98	43.77	43.77
LRWT_f6p0_446_transcript92601_g2	blue	39.27	59.79	49.25	24.14	20.04	25.45	19.65	17.66	28.96	57.65	27.19	42.7	26.86	30.74	30.74
LRWT_f2p0_1575_transcript43374_g10	blue	47.99	31.51	24.62	12.49	28.58	10.88	4.94	8.05	15.01	25.27	20.82	16	7.74	6.09	6.09
LRWT_f5p0_236_transcript105381_g7	blue	8.92	66.03	22.68	0	6.24	42.81	14.51	0	0	20.52	31.42	26.04	0	0	0
LRWT_f46p0_1443_transcript45893_g1	blue	144.35	175.59	130.54	48.19	41.39	38.52	54.9	54.41	57.46	76.56	69.6	59.71	46.1	55.01	55.01
LRWT_f6p0_1570_transcript40557_g1	blue	79.15	77.67	86.62	67.03	80.66	78.06	88.58	77.4	69.16	78.57	95.6	91.92	58.36	41.3	41.3
LRWT_f2p0_1486_transcript46146_g4	blue	42.54	31.29	37.33	24.08	22.62	18.43	36.61	33.32	38.5	15.18	21.9	22.66	30.51	4.54	4.54
LRWT_f5p0_1294_transcript53527_g3	blue	82.04	84.56	66.16	62.31	51.18	44.24	45.68	61.01	61.19	57.99	63.66	52.48	73.79	71.2	71.2
LRWT_f3p0_643_transcript83087_g4	blue	107.85	113.76	94.65	82.65	66.17	61.33	61.97	48.77	65.5	68.6	62.86	70.85	85.19	72.24	72.24
LRWT_f2p0_2942_transcript14168_g5	blue	30.49	41.69	36.92	20.81	32.37	18.11	19.09	12.54	30.1	27.96	34.9	40.7	20.65	11.9	11.9
LRWT_f2p0_1763_transcript36542_g2	blue	63.55	84.33	46.17	8.16	25.7	20.57	14.8	10.03	15.31	99.25	29.42	60.79	13.67	20.42	20.42
LRWT_f2p0_2809_transcript15885_g1	blue	61.69	54.92	52.77	26.92	36.87	31.81	34	35.52	34.52	56.47	55.98	55.12	24.28	26.68	26.68
LRWT_f12p0_1217_transcript55715_g1	blue	7.81	27.38	22.55	26.12	9.37	13.71	7.73	5.13	0.23	40.32	6.76	53.66	8.57	22.57	22.57
LRWT_f52p0_1130_transcript56240_g1	blue	121.14	123.13	121.91	119.58	102.93	106.58	93.75	92.86	95.1	104.68	107.86	95.85	109.36	101.06	101.06
LRWT_f2p0_1656_transcript40697_g15	blue	14.75	46.83	6.68	8.73	12.13	12.68	31.42	22.59	0.18	3.3	43.14	45.22	0.2	4.8	4.8
LRWT_f2p0_860_transcript72520_g16	blue	101.11	92.76	100.37	77.37	53.58	69.56	76.62	79.18	57.75	62.28	69.61	77.04	60.59	60.78	60.78
LRWT_f18p0_350_transcript97300_g1	blue	25.2	74.53	68.79	118.71	54.8	46.42	29.45	33.14	34.19	65.6	80.65	33.89	37.59	30.36	30.36
LRWT_f9p0_2195_transcript25580_g1	blue	27.47	10.22	22.81	2.11	10.23	0	17.82	16.68	19.73	14.05	13.51	38.93	4.69	0.06	0.06
LRWT_f4p0_718_transcript78877_g1	blue	37.32	35.44	37.91	30.94	21.23	14.29	14.83	18.09	14.08	14.45	29.75	15.65	51.98	23.65	23.65
LRWT_f4p0_1651_transcript39098_g1	blue	115.02	105.47	110.06	96.66	105.35	101.56	114.27	116.87	98.63	112.68	118	123.14	84.25	72.58	72.58
LRWT_f22p0_1056_transcript61867_g1	blue	95.06	85.87	69.14	39.76	41.91	33.12	38.45	84.19	40.79	52.4	51.5	51.96	41.08	36.99	36.99
LRWT_f3p0_1796_transcript35871_g6	blue	59.41	52.13	65.9	31.54	25.47	37.22	34.08	29.05	24.97	21.8	31.29	21.91	38.27	42.87	42.87
LRWT_f6p0_786_transcript70946_g1	blue	36.51	80.13	29.38	26.28	9.57	15.24	17.55	18.44	29.81	31.48	26.33	56.57	30.83	14.43	14.43
LRWT_f9p0_1432_transcript47867_g1	blue	105.34	110.72	89.73	52.24	62.36	67.89	70.12	66.42	66.03	102.28	84.69	87.43	68.25	71.09	71.09
LRWT_f3p0_3858_transcript5117_g1	blue	93.54	68.82	72.51	32.73	55.57	47.76	80.15	73.6	81.24	74.99	81.09	78.85	34.74	32.19	32.19
LRWT_f2p0_868_transcript71608_g5	blue	27.83	61.97	15.86	7.14	17.46	12.79	0.28	22.94	29.18	10.38	6.75	33.01	25.38	9.06	9.06
LRWT_f11p0_1244_transcript54125_g2	blue	96.83	91.52	77.79	54.93	70.99	79.52	77.6	94.98	87.46	119.31	100.05	91.13	79.94	88.64	88.64
LRWT_f3p0_769_transcript76569_g7	blue	51.06	15.79	52.92	27.74	34.09	7.5	23.05	2.59	1.39	17.07	16.19	4.94	23.22	10.44	10.44
LRWT_f5p0_2507_transcript20365_g1	blue	59.98	97.95	89.41	37.08	62.55	51.29	49.88	45.11	87.28	39.32	95.4	59.45	42.86	44.04	44.04
LRWT_f30p0_3091_transcript11450_g1	blue	47.93	13.58	14.77	16.21	7.31	8.97	47.17	38.76	6.51	2.59	39.33	58.59	0	15.19	15.19
LRWT_f7p0_1998_transcript29087_g1	blue	55.45	53.66	58.33	32.06	37.25	32.59	34.27	29.79	23.22	45.72	43.58	40.42	26	25.63	25.63
LRWT_f8p0_623_transcript83050_g1	blue	81.84	56.66	59.09	35.81	72.91	35.81	37.42	37.71	53.02	67.73	83.17	54.31	62.5	64.81	64.81
LRWT_f11p0_1185_transcript56792_g1	blue	34.41	29.82	37.02	10.21	6.65	12.6	11.3	9.64	11.89	30.96	33.84	26.13	7.62	16.26	16.26
LRWT_f2p0_2354_transcript23061_g9	blue	115.27	98.65	55.6	45.67	33.01	41.64	30.86	28.16	45.27	57.64	77.71	37.06	36.93	40.56	40.56
LRWT_f4p0_1598_transcript40929_g1	blue	124.11	114.16	111.6	88.81	97.44	97.12	104.51	87.02	89.64	117.5	126.66	107.69	91.9	96.35	96.35
LRWT_f11p0_3245_transcript9701_g2	blue	50.13	52.43	42.65	26.14	29.84	27.62	50.81	50.4	42.19	40.78	42.45	47.77	30.41	28.61	28.61
LRWT_f3p0_2637_transcript17725_g1	blue	29.78	41.6	19.47	14.58	47.74	24.14	36.51	30.2	16.95	43.29	15.45	19.73	24.07	10.33	10.33
LRWT_f17p0_1784_transcript33970_g1	blue	63.37	59.12	60.94	23.91	27.69	32.39	40.06	26.42	36.4	28.55	44.54	38.97	19.09	37.14	37.14
LRWT_f22p0_1170_transcript57229_g1	blue	121.07	121.96	127.83	107.3	100.08	104.33	112.13	110.55	97.54	99.54	112.48	113.83	112.5	123.61	123.61
LRWT_f34p0_1038_transcript62021_g1	brown	1028.97	725.64	1079.4	3759.84	3866.07	3871.31	1775.98	2549.43	3017.28	1293.11	1053.4	1019.39	1404.83	2144.45	2144.45
LRWT_f862p0_540_transcript84504_g1	brown	4010.02	3637.39	3311.09	6316.5	5830.42	8269.16	5408.39	5172.74	5758.33	6239.9	4664.19	4511.68	5015.1	5708.89	5708.89
LRWT_f13p0_977_transcript64568_g1	brown	291	103.99	59.78	2403.34	1961.92	3033.69	1081.56	1210.2	3158.35	1047.61	808.06	354.59	718.33	1611.47	1611.47
LRWT_f55p0_1496_transcript44277_g1	brown	1401.22	978.64	1300.69	1838.62	2492.21	2948.9	2872.95	2188.04	3104.79	1929.62	1161.32	2029.54	1550.94	1174.52	1174.52
LRWT_f23p0_1200_transcript56135_g1	brown	1003.38	1105.56	1080.74	2313.59	2225.48	3395.48	3755.5	3342.78	3407.14	2280.25	2994.97	2909.08	3066.6	2833.99	2833.99
LRWT_f2p0_935_transcript68692_g20	brown	427.32	390.72	487.52	1797.4	1548.45	1997.3	865.77	1449.3	2731.94	678.2	753.46	1071.32	1025.65	894.1	894.1
LRWT_f29p0_605_transcript83395_g1	brown	110.27	214.71	130.89	2115.45	1639.67	1131.52	2356.68	1748.35	1287.37	1499.14	991.16	1328.65	2276.17	1700.24	1700.24
LRWT_f19p0_709_transcript78423_g1	brown	243.38	74.28	102.5	641.68	582.04	1307.77	2290.11	591.9	2346.88	353.39	204.42	292.19	280.54	946.46	946.46
LRWT_f3p0_710_transcript79599_g6	brown	573.74	433.2	453.54	1308.37	854.56	1511.23	1692.43	1027.91	1806.04	622.93	822.94	1317.89	1066.35	1394.36	1394.36
LRWT_f6p0_1461_transcript47097_g2	brown	1313.28	1517.12	1445.99	2182.38	2179.32	1921.51	1841.76	1603.13	1943.49	1758.1	1527.76	1581.71	2211.61	2220.87	2220.87
LRWT_f18p0_874_transcript70751_g1	brown	744.07	480	575.84	2859.15	2512.31	1910.63	3112.32	2536.36	2829.52	2977.85	2653.75	2688.99	3261.33	2447.91	2447.91
LRWT_f8p0_1085_transcript61745_g1	brown	881.54	714.52	707.34	1361.06	1583.61	1436.41	1222.73	1247.34	1275.2	712.12	777.15	861.6	1441.31	1568.22	1568.22
LRWT_f2p0_773_transcript75777_g2	brown	693.51	0.91	283.3	689.1	800.86	511.97	783.97	130.61	828.94	2.05	556.45	1.28	0.9	828.83	828.83
LRWT_f3p0_703_transcript79740_g1	brown	214.42	218.98	211.71	843.36	847.21	741.44	722.68	803.85	927.86	240.85	246.82	230.99	845.5	1000.13	1000.13
LRWT_f20p0_1050_transcript62634_g1	brown	437.59	860.61	463.83	1321.81	1244.22	1222.09	1001.51	788.19	1073.34	705.1	730.6	657.57	913.96	1171.5	1171.5
LRWT_f5p0_920_transcript67339_g1	brown	244.54	206.96	310.34	1381.52	1173.23	775.37	500.81	1214.32	538.58	401.86	297.65	450.42	315.72	880.85	880.85
LRWT_f6p0_1862_transcript33592_g3	brown	288.48	297.02	268.99	796.27	1045.28	1163.06	854.35	839.61	1370.56	584.2	455.36	546.32	438.87	487.03	487.03
LRWT_f28p0_737_transcript74267_g1	brown	738.59	1179.08	1306.46	2267.37	1850.61	1543.52	1180.85	1508.11	1377.54	973.68	1030.12	962.66	946.16	1332.68	1332.68
LRWT_f24p0_2008_transcript28809_g1	brown	153.02	63.01	158.75	930.28	981.69	705.28	775.34	656.56	869.72	407.22	375.45	483.65	662.29	480.77	480.77
LRWT_f7p0_629_transcript82632_g2	brown	379.64	289.55	408.37	675.12	517.18	887.66	536.05	599.65	793.22	277.01	287.47	228.84	681.91	756.15	756.15
LRWT_f12p0_1894_transcript30929_g1	brown	492.1	657.76	1164.29	1570.72	1290.14	2267.46	1244.06	882.94	656.32	773.37	868.53	940.53	1184.61	1026.5	1026.5
LRWT_f2p0_1403_transcript49932_g17	brown	125.1	114.81	101.77	567.54	625.26	379.16	169.61	453.01	1040.22	314.58	239.54	410.38	432.96	650.83	650.83
LRWT_f2p0_1005_transcript65593_g16	brown	399.5	167.3	94.79	1400.57	748.48	702.4	352.32	212.43	708.63	655.41	442.26	327.29	410.83	496.53	496.53
LRWT_f3p0_854_transcript72321_g6	brown	17.15	363.11	195.78	189.97	513.51	832.4	1165.96	1061.79	442.87	151.38	337.99	639.84	492.85	408.46	408.46
LRWT_f8p0_893_transcript69731_g2	brown	157.57	149.31	165.67	744.4	549.39	414.97	170.15	401.29	737.08	318.87	138.14	341.56	428.2	610.99	610.99
LRWT_f15p0_1288_transcript53447_g1	brown	151.81	114.29	118.48	1039.63	959.14	750.32	578.64	832.79	796.49	354.01	504.08	527.76	898.55	788.1	788.1
LRWT_f233p0_916_transcript66215_g1	brown	199.94	202.69	360.3	756.93	807.12	1527	1142.13	346.56	733.52	520.7	308.63	387.93	430.15	513	513
LRWT_f256p0_1214_transcript53056_g1	brown	657.99	762.32	683.32	1028.25	1278.41	1795.64	1545.1	1126.24	1220.83	1231.78	955.02	1190.81	785.59	969.76	969.76
LRWT_f22p0_700_transcript75530_g1	brown	99.34	86.96	99.42	701.08	568.2	496.22	347.69	546.75	373.82	79.03	76.49	80.53	187.25	300.71	300.71
LRWT_f2p0_1353_transcript51605_g11	brown	131.3	71.91	83.92	616.49	794.56	1032.86	358.41	890.06	730.57	426.42	131.25	193.04	332.21	226.79	226.79
LRWT_f5p0_1796_transcript35799_g3	brown	307.23	315.9	756.37	921.92	764.4	574.76	878.39	966.8	480.27	479.54	738.64	363.9	556.19	547.96	547.96
LRWT_f3p0_1396_transcript48994_g3	brown	325.2	322.65	175.79	969.48	679.86	785.99	316.97	639.69	1177.61	719.17	380.06	618	790.05	438.33	438.33
LRWT_f2p0_551_transcript88175_g20	brown	766.56	484.32	411.48	729.55	440.64	809.11	661.13	877.94	631.06	302.72	345.67	590.39	631.88	336.61	336.61
LRWT_f7p0_1356_transcript50026_g2	brown	452.25	264.17	421.86	513.8	737.44	692.96	517.31	461.34	651.86	683.81	281.46	321.92	352.55	274.79	274.79
LRWT_f2p0_1498_transcript46155_g8	brown	53.11	36.22	37.11	794.13	498.62	837.12	436.19	426.88	744.34	390.94	105.81	191.38	329.48	248.04	248.04
LRWT_f2p0_797_transcript75021_g8	brown	473.23	437.01	554.81	1153.73	932.09	1091.89	442.02	679.59	752.01	601.14	477.4	619.58	808.18	650.71	650.71
LRWT_f6p0_1057_transcript63147_g3	brown	399.07	369.58	338.86	855.2	857.66	705.18	335.88	677.28	1032.47	684.83	556.2	826.74	665.4	672.06	672.06
LRWT_f18p0_436_transcript92909_g1	brown	68.55	160.63	46.93	566.81	404.11	304.1	86.6	664.14	1273.79	271.62	117.09	171.55	456.28	358.42	358.42
LRWT_f195p0_1142_transcript56373_g1	brown	309.95	363.35	190.07	345.8	546.11	1043.46	1170.43	727.33	801.43	626.58	429.56	544.82	688.25	575.65	575.65
LRWT_f6p0_1728_transcript36887_g1	brown	112.03	150.11	62.95	390.33	452.56	196.04	136.97	454.32	700.38	310.69	147.08	255.32	429.25	461.23	461.23
LRWT_f3p0_1418_transcript47925_g1	brown	456.71	198.19	246.81	582.46	923.22	1196.7	940.38	741.74	1087.93	518.5	512.24	516.51	668.1	595.78	595.78
LRWT_f3p0_1464_transcript47386_g7	brown	5	116.76	55.28	322.03	812.53	251.6	117.78	607.17	293.69	193.06	222.91	182.18	378.96	390.19	390.19
LRWT_f2p0_1071_transcript62717_g10	brown	51.74	17.24	21.32	404.08	449.9	289.97	508.14	178.93	549.13	86.78	251.34	153.03	335.78	280.64	280.64
LRWT_f3p0_1220_transcript56804_g5	brown	98.69	70.51	79.77	673.32	528.46	1119.81	408.98	122.85	450.78	103.62	137.52	107.83	213.09	339.17	339.17
LRWT_f7p0_978_transcript66461_g2	brown	615.75	516.86	529.48	737.1	784.18	981.52	1048.57	891.18	813.45	677.4	646.11	584.24	609.2	763.21	763.21
LRWT_f3p0_1530_transcript45026_g6	brown	2231.67	2318.56	2454.93	3287.46	3315.23	2681.5	2821.23	2760.38	2825.37	2767.36	2928.86	2824.7	2552.15	2808.34	2808.34
LRWT_f3p0_638_transcript83346_g8	brown	33.34	189.77	407.01	570.69	374.93	479.72	171.46	536.4	80.47	430.38	78.51	478.1	362.37	274.65	274.65
LRWT_f3p0_1564_transcript43722_g3	brown	102.9	53.58	117.95	578.5	369.72	546.63	482.43	300.19	529.71	404.92	416.38	248.4	366.16	298.45	298.45
LRWT_f4p0_1080_transcript62171_g4	brown	244.97	243.56	255.11	410.75	439.79	544.18	786.15	426.45	867.61	583.81	328.2	409.31	1178.43	429.19	429.19
LRWT_f22p0_830_transcript72686_g1	brown	587.36	608.37	681.73	1148.05	854.33	889.68	840.52	841.58	759.21	570.04	750.07	708.53	1044.38	952.73	952.73
LRWT_f2p0_986_transcript66322_g4	brown	22.11	91.23	60.3	246.49	241.18	378.25	445.07	365.98	209.29	108.84	118.74	184.85	385.84	219.99	219.99
LRWT_f5p0_548_transcript87891_g3	brown	220.47	315.1	112.08	493.83	399.74	505.29	415.23	962.27	134.62	414.07	325.16	211.14	841.44	329.51	329.51
LRWT_f2p0_1221_transcript56762_g7	brown	27.33	124.16	89.74	557.65	412.06	547.02	429.25	236.73	174.36	151.2	154.37	5.55	93.69	282.72	282.72
LRWT_f2p0_660_transcript79971_g1	brown	88.92	45.29	122.1	983.6	671.68	457.57	370.53	283.6	218.99	219.55	376.21	215.11	570.81	321.71	321.71
LRWT_f3p0_562_transcript87380_g4	brown	164.18	422.98	255.95	369.33	429.94	454.9	296.31	507.09	219.04	294.24	130.95	148.43	137.77	263.42	263.42
LRWT_f3p0_1362_transcript51164_g5	brown	284.98	254.1	262.47	570.85	579.08	644.94	390.26	475.57	682.37	470.1	364.24	345.91	436.17	532.81	532.81
LRWT_f3p0_2764_transcript16263_g1	brown	100.37	105.84	111.59	401.51	387.08	471.15	199.49	238.86	211.64	74.84	74.52	66.94	229.13	286.47	286.47
LRWT_f57p0_493_transcript90574_g1	brown	57.94	73.42	112.77	273.94	314.24	387.15	299.45	200.3	485.46	127.12	77	81.18	263.29	230.6	230.6
LRWT_f13p0_1628_transcript40509_g2	brown	28.41	22.93	22.45	127.67	316.58	328.76	292.34	367.51	235.57	268.3	93.01	86.33	173.29	196.46	196.46
LRWT_f4p0_783_transcript75216_g3	brown	13.86	133.9	270.39	104.08	201.84	559.44	100.96	328.88	356.84	2.45	91.49	275.28	4.52	251.06	251.06
LRWT_f2p0_977_transcript66716_g8	brown	61.16	44.15	59.61	215.09	201.03	157.5	63.28	166.04	261.13	48.45	41.03	57.86	224.05	269.79	269.79
LRWT_f9p0_1280_transcript53994_g2	brown	10.1	20.39	7.21	220.15	237.78	381.21	383.76	457.48	855.98	317.07	318.37	182.64	193.22	222.3	222.3
LRWT_f77p0_625_transcript82282_g1	brown	490.56	393.07	367.1	771.28	608.67	628.27	502.69	465.61	395.79	390.13	462.74	342.4	532.25	500.03	500.03
LRWT_f2p0_2455_transcript21584_g12	brown	39.68	49.96	56.67	357.02	426.2	406.36	165.24	170.24	231.44	29.81	23.64	33.61	115.73	144.21	144.21
LRWT_f52p0_810_transcript72591_g1	brown	123.58	52.41	147.04	333.18	335.65	339.14	375.12	223.44	291.36	92.18	157.36	95.53	214.83	189.17	189.17
LRWT_f3p0_954_transcript67690_g6	brown	148.58	358.77	12.96	964.86	181.8	607.99	519.16	305.64	275.3	10	248.15	272.61	476.65	216.55	216.55
LRWT_f23p0_1673_transcript38918_g1	brown	36.47	30.1	28.85	248.01	266.82	359.35	237.8	243.06	304.73	165.09	142.74	154.06	146.17	129.74	129.74
LRWT_f6p0_1519_transcript45350_g3	brown	14.5	29.64	25.51	172.08	280.26	389.32	305.93	211.13	248.69	117.19	101.11	177.76	138.15	49.35	49.35
LRWT_f8p0_817_transcript72224_g1	brown	54.81	47.06	48.53	284.12	248.45	212.51	72.98	165.46	226.94	66.84	55.39	102.07	178.83	253.67	253.67
LRWT_f4p0_471_transcript92161_g2	brown	24.29	25.46	40.94	269.54	175.72	128.83	44.28	144.16	217.71	47.68	43.46	81.88	173.86	255.76	255.76
LRWT_f2p0_2350_transcript23127_g5	brown	21.57	8.5	15.45	267.29	236.27	175.16	40.61	136.35	523.65	74.62	47.56	59.04	131.51	179.15	179.15
LRWT_f23p0_718_transcript76755_g1	brown	536.96	561.39	583.86	843.08	728.03	789.76	679.87	729.78	596.18	401.71	592.8	615.27	698.33	748.76	748.76
LRWT_f32p0_911_transcript67733_g1	brown	70.91	21.43	56.09	199.37	277.54	363.64	489.23	229.38	177.93	211.19	164.93	109.2	94.38	81.27	81.27
LRWT_f7p0_695_transcript77068_g1	brown	41.71	16.48	27.22	423.2	197.09	219.58	14.77	96.27	513.19	44.82	12.89	6.04	175.27	210.88	210.88
LRWT_f27p0_1808_transcript32525_g1	brown	285.13	267.11	413.41	531.42	734.08	701.42	449.74	537.99	708.02	498.31	397.96	499.15	300.89	402.09	402.09
LRWT_f3p0_835_transcript73376_g9	brown	263.3	348.34	214.48	571.2	475.59	463.91	244.64	360.43	261.57	327.61	343.67	231.76	265.83	392.36	392.36
LRWT_f12p0_1461_transcript47108_g2	brown	97.86	109.94	64.42	272.56	281.92	320.44	151.83	174.3	148.49	56.19	68.51	160.4	192.86	56	56
LRWT_f16p0_828_transcript70197_g1	brown	253.7	291.34	289.73	493.18	427.84	483.46	384.62	423.85	404.56	323.7	299.64	291.08	417.5	461.65	461.65
LRWT_f60p0_496_transcript86497_g1	brown	192.63	222.74	183.1	517.77	400.06	430.88	313.98	366.04	305.17	259.7	236.17	203.56	364.47	360.22	360.22
LRWT_f209p0_684_transcript75578_g1	brown	502.91	571.98	598.52	961.59	772.53	753.71	677.59	700.26	651.7	577.21	697.04	606.14	772.22	694.96	694.96
LRWT_f3p0_1790_transcript36012_g2	brown	193.01	258.96	233.4	143.81	322.95	335.67	459.3	367.65	502.01	223.9	338.11	414.28	393.63	386.96	386.96
LRWT_f17p0_821_transcript73350_g1	brown	124.01	127.22	150.59	382.6	327.53	258.61	380.81	397.66	461.05	226.09	391.93	329.83	403.14	182.37	182.37
LRWT_f3p0_500_transcript90767_g5	brown	220.78	158.51	118.32	538.89	247.42	201.24	302.69	319.5	338.69	119.77	163.44	239.1	696.01	266.02	266.02
LRWT_f17p0_624_transcript81842_g1	brown	118.29	339.14	129.51	462.59	468.39	393.39	353.19	381.91	364.74	225.64	189.04	119.71	322.68	322.56	322.56
LRWT_f4p0_2102_transcript27881_g2	brown	626.83	523.56	659.37	697.18	749.14	824.94	1113.94	1229.13	905.71	568.51	614.73	662.63	658.84	710.95	710.95
LRWT_f6p0_1087_transcript62160_g2	brown	94.73	60.19	104.77	299.41	316.64	367.16	209.2	264.98	323.41	186.47	141.99	163.54	181.11	279.3	279.3
LRWT_f53p0_1352_transcript49894_g1	brown	287.64	188.28	190.86	431.7	361.86	644.29	368.22	446.51	545.25	542.03	344.85	429.92	333.06	354.58	354.58
LRWT_f9p0_685_transcript78717_g2	brown	29.61	39.58	23.82	215.44	142.58	144.37	58.64	119.78	201.86	50.5	56.69	55.98	179.47	214.28	214.28
LRWT_f14p0_837_transcript72535_g2	brown	239.8	404.31	336.37	663.46	557.87	556.64	391.4	538.24	359.33	392.41	373.07	274.98	555.41	430.86	430.86
LRWT_f5p0_455_transcript92912_g2	brown	155.88	38.14	268.73	219.45	214.49	466.93	217.58	293.81	388.06	167.94	397.45	281.95	403.05	302.42	302.42
LRWT_f17p0_1372_transcript49847_g2	brown	632.06	622.66	713.93	975.2	931.76	982.72	803.49	736.66	751.6	710.42	772.25	754.68	730.6	557.69	557.69
LRWT_f4p0_739_transcript75276_g3	brown	16.28	16.51	20.56	401.95	111.45	160.54	30.31	116.53	295.17	22.81	13.79	43.17	93.12	89.33	89.33
LRWT_f27p0_684_transcript78694_g1	brown	369.62	348.75	429.53	780.13	508.61	505.24	543.43	525.89	565.06	433.25	472.34	415.01	578.68	573.98	573.98
LRWT_f9p0_2484_transcript20232_g2	brown	47.74	39.75	43.83	193.3	278.11	292.36	182.9	150.29	173.59	26.93	45.32	32.85	122.14	108.23	108.23
LRWT_f3p0_1580_transcript42902_g1	brown	36.49	53.15	57.78	14.72	210.97	274.6	75.14	216.55	184.39	202.25	109.38	249.28	116.82	174.7	174.7
LRWT_f11p0_684_transcript77036_g1	brown	27.54	30.47	23.09	273.78	168.95	182.55	91.51	113.49	123.31	19.81	12.03	17.2	92.42	132.61	132.61
LRWT_f14p0_308_transcript101337_g1	brown	49.81	58.54	91.1	374.38	218.88	125.62	58.14	122.94	194.81	73.76	54.31	100.46	201.06	165.47	165.47
LRWT_f5p0_1062_transcript63071_g2	brown	207.73	205.52	232.66	295.4	334.45	452.83	359.41	452.22	234.99	315.14	159.22	232.88	249.89	398.27	398.27
LRWT_f4p0_1017_transcript64982_g6	brown	368.3	457.09	352.02	567.22	640.02	686.73	582.39	494.42	621.94	472.94	519.8	471.34	436.63	538.94	538.94
LRWT_f68p0_959_transcript65608_g1	brown	175.51	194.36	182.05	239.39	332.39	388.42	248.7	267.62	354.3	178.73	192.28	250.5	255.05	312.55	312.55
LRWT_f7p0_1402_transcript49564_g3	brown	62.89	51.67	69.44	225.83	171.26	252.68	262.72	345.43	248.38	127.36	109.24	111.69	137.83	196.95	196.95
LRWT_f7p0_1698_transcript39127_g3	brown	222.45	175.14	202.27	370.98	397.28	316.04	236.01	412.67	566.39	340.34	267.42	330.64	354.43	401.96	401.96
LRWT_f11p0_1122_transcript60517_g1	brown	595.07	649.7	656.17	963.21	932.15	1017.68	824.56	849.22	765.65	724.19	763.2	733.48	790.09	719.19	719.19
LRWT_f93p0_925_transcript67161_g1	brown	695.18	759.65	754.22	1044.63	957.22	940.14	893.96	966.17	901.31	783.77	797.64	824.35	886.49	840.26	840.26
LRWT_f22p0_2448_transcript19177_g1	brown	60.25	38.27	136.67	196.09	298.78	230.87	253.41	195.52	308.46	149.52	146.27	109.95	163.88	267.79	267.79
LRWT_f12p0_1054_transcript62665_g1	brown	253.76	267.61	240.91	374.32	311.31	314.79	315.27	326.95	367.29	257.18	212.7	259.13	404.27	401.69	401.69
LRWT_f36p0_741_transcript76313_g1	brown	124.1	166.87	100.07	232.24	230.34	321.91	223.87	232.86	211.39	162.41	153.99	131.39	307.95	239.19	239.19
LRWT_f9p0_1330_transcript51846_g2	brown	95.96	89.73	112.2	290.97	347.42	312.72	442.16	427.41	380.6	378.15	307.13	299	361.92	422.79	422.79
LRWT_f3p0_672_transcript81466_g5	brown	2.25	7.35	7.48	158.22	177.6	131.65	10.81	58.95	179.63	3.86	2.84	16.99	59.6	234.25	234.25
LRWT_f44p0_1568_transcript42138_g1	brown	81.22	131.1	128.14	250.53	222.34	218.41	286.73	152.78	208.64	191.83	111.13	167.94	103.98	91.34	91.34
LRWT_f7p0_975_transcript65879_g5	brown	36.36	25.66	44.63	389.15	217.67	202.14	49.27	96.39	194.79	62.49	61.09	97.88	106.48	153.69	153.69
LRWT_f3p0_2751_transcript16686_g1	brown	111.12	115.92	118.51	311.57	387.2	345.05	363.67	402.83	384.39	253.38	281.76	291.24	293.26	257.04	257.04
LRWT_f35p0_1782_transcript33201_g1	brown	142.83	68.79	116.12	183.73	243.64	258.83	245.19	359.24	286.92	191.55	233.33	205.37	126.53	290.94	290.94
LRWT_f4p0_790_transcript75268_g5	brown	85.03	90.36	91.14	280.47	246.94	292.31	246.97	263.49	203.52	155.9	142.61	163.08	216.67	237.25	237.25
LRWT_f2p0_2345_transcript23214_g7	brown	16.99	17.85	6.2	170.93	168.01	84.68	36.75	170.15	214.23	30.88	17.93	42.67	126.57	71.2	71.2
LRWT_f3p0_738_transcript78026_g7	brown	62.13	146.96	4.7	301.53	292.69	123.66	121.81	59.47	159.13	98.78	194.54	178.35	49.44	199.98	199.98
LRWT_f51p0_1134_transcript58419_g1	brown	205.87	162.37	115.68	551.8	503.39	294.3	187.76	130.53	387.59	153.3	113.95	155.68	258.47	182.71	182.71
LRWT_f4p0_1101_transcript61486_g5	brown	498.77	468.97	567.03	779	645.26	638.06	728.7	596.14	590.03	489.8	619	511.25	942.04	662.4	662.4
LRWT_f11p0_816_transcript73056_g1	brown	22.34	25.09	82.18	161.24	116.73	258.22	461.38	122.34	194.87	133.02	77.62	122.83	357.7	149.33	149.33
LRWT_f3p0_1210_transcript57148_g3	brown	54.1	27.36	32.07	74.11	164.56	135.49	153.71	159.22	77.82	180.9	98.8	84.6	180.67	103.82	103.82
LRWT_f13p0_1956_transcript28972_g1	brown	75.69	69.03	76.3	126.26	150.67	223.24	175.88	154.72	189.01	77.86	72.98	64.52	122.13	130.19	130.19
LRWT_f3p0_761_transcript76812_g3	brown	26.34	43.58	33.28	102.52	221.72	340.86	151.36	84.42	130.52	1.91	9.89	14.39	68.61	75.84	75.84
LRWT_f5p0_1205_transcript57231_g1	brown	68.38	46.95	44.94	80.1	105.23	122.4	287.22	242.97	157.01	126.3	206.49	197.01	157.77	160.39	160.39
LRWT_f32p0_805_transcript72249_g1	brown	59.51	62.42	98.31	160.68	209.85	252.87	300.29	178.22	252.73	112.89	151.59	227.9	203.25	244.38	244.38
LRWT_f5p0_1366_transcript50287_g1	brown	313.2	126.83	224.71	211.54	313.04	359.47	473.5	394.04	232.75	127.37	297.84	348.78	287.11	310.68	310.68
LRWT_f2p0_409_transcript95504_g1	brown	51.1	67.59	23.74	195.33	108.74	106.73	23.17	23.27	146.78	159.76	37.75	100.21	140.1	91.36	91.36
LRWT_f16p0_1054_transcript60445_g1	brown	76.41	72.08	70.3	223.34	184.27	148.59	124.77	126.58	170.45	98.2	108.28	108.72	175.31	181.18	181.18
LRWT_f24p0_1617_transcript40556_g1	brown	42.7	118.25	86.89	125.06	173.21	174	154.75	189.23	65.75	77.57	68.74	70.25	183.78	157.38	157.38
LRWT_f4p0_553_transcript87831_g4	brown	147.54	162.29	118.99	292.97	224.71	337.79	232.43	328.23	235.59	230.48	147.99	219.71	172.92	209.08	209.08
LRWT_f2p0_1532_transcript44870_g4	brown	319.64	245.84	238.05	308.62	387.22	427.78	376.31	341.69	335.91	290.28	261.17	258.14	304.83	239.84	239.84
LRWT_f80p0_2081_transcript26295_g1	brown	102.05	95.14	102.93	229.06	306.1	317.58	165.93	209.36	177.66	182.41	145.21	160.05	113.79	126.36	126.36
LRWT_f3p0_937_transcript68384_g3	brown	36.47	98.25	73.25	528.38	206.24	144.34	178.12	120.63	85.55	10.18	60.43	118.3	142.26	4.56	4.56
LRWT_f6p0_2025_transcript27808_g1	brown	26.92	21.79	28.75	131.96	162.96	190.55	112.78	95.77	117.67	26.91	24.75	29.69	72.99	74.47	74.47
LRWT_f119p0_1623_transcript38924_g1	brown	118.32	101.91	119.65	256.2	280.75	197.68	152.92	182.46	241.48	157.69	155.29	128.72	228.02	197.81	197.81
LRWT_f40p0_493_transcript87883_g1	brown	172.59	73.77	55.39	220.74	176.38	201.85	187.69	137.23	167.03	73.65	127.38	92.96	181.88	274.55	274.55
LRWT_f23p0_1046_transcript63738_g2	brown	36.79	127.58	66.62	145.56	152.17	143.79	94.74	230.35	161.97	89.06	44.23	60.18	30.6	57.57	57.57
LRWT_f4p0_2491_transcript20717_g5	brown	155.92	126.39	183.01	306.04	319.42	363.46	294.47	242.32	194.67	200.68	217.92	231.48	193.82	152.89	152.89
LRWT_f6p0_1683_transcript38882_g2	brown	275.65	319.99	312.55	697.52	736.7	652.26	448.58	388.88	288.34	318.55	379.6	303.31	416.16	317.47	317.47
LRWT_f27p0_988_transcript63370_g1	brown	34.26	35.33	38.52	136.51	109.86	141.51	92.36	105.65	82.54	35.77	31.97	34.29	104.18	114.77	114.77
LRWT_f5p0_767_transcript75465_g3	brown	14.27	16.67	18.43	275.27	164.83	186.74	49.36	82.26	96.75	18.15	16.49	13.42	93.6	62.1	62.1
LRWT_f4p0_1041_transcript63990_g7	brown	204.35	128.77	199.36	244.91	301.55	337.43	112.82	257.8	272.13	267.81	324.09	293.5	335.17	246.5	246.5
LRWT_f2p0_1596_transcript40333_g1	brown	48.61	139.21	35.54	179.09	258.62	135.93	141.05	107.81	171.96	0.31	86.84	130.46	158.99	76.1	76.1
LRWT_f16p0_888_transcript69866_g2	brown	353.06	358.03	343.71	563.64	511.07	592.37	720.96	528.25	600.3	588.74	545.19	601.87	699.58	627.86	627.86
LRWT_f26p0_1858_transcript31935_g1	brown	74.5	106.58	198.64	299.87	148.57	194.11	155.36	212.67	233.14	161.11	149.89	95.65	201.33	135.89	135.89
LRWT_f4p0_1594_transcript42046_g1	brown	73.89	52.33	122.22	154.49	132.05	79.25	99.73	23.22	130.71	1.71	26.53	69.47	18.98	46.05	46.05
LRWT_f3p0_936_transcript69796_g14	brown	20.29	30.63	24.26	115.74	85.39	127.11	64.7	87.75	139.21	35.46	30.1	41.09	127.98	111.01	111.01
LRWT_f2p0_1196_transcript57515_g1	brown	147.89	101.14	14.3	122.31	157.92	271.58	173.57	224.77	113.73	172.62	198.04	92.33	150.51	105.8	105.8
LRWT_f6p0_1739_transcript35593_g1	brown	70.59	32.3	49.81	121.67	211.12	129.86	179.36	270.29	258.84	169.11	170.93	162.67	78.81	186.03	186.03
LRWT_f9p0_1173_transcript58159_g1	brown	51.87	46.21	43.35	150.62	131.16	78.17	37.35	99.38	183.12	85.63	62.47	98.16	99.65	139.76	139.76
LRWT_f10p0_1435_transcript47181_g1	brown	42.69	38.41	43.39	129.3	135.49	154.86	109.55	132.16	111.37	36.33	34.02	39.41	108.79	94.05	94.05
LRWT_f18p0_1434_transcript48314_g1	brown	290.49	252.66	206.51	365.55	344.19	429.99	248.33	290.32	474.02	291.7	274.5	333.07	235.16	328.63	328.63
LRWT_f3p0_511_transcript90684_g10	brown	43.62	40.04	56.91	173.59	176.19	122.76	156.88	168.28	79.79	157.42	107.13	172.08	120.81	119.12	119.12
LRWT_f2p0_1761_transcript36907_g4	brown	80.96	40.33	47.44	101.16	114.84	280.73	72.57	230.7	220.89	127.44	91.11	66.65	44.14	141.58	141.58
LRWT_f4p0_2220_transcript25209_g2	brown	157.11	144.42	175.58	315.19	370.55	403.29	245.92	214.52	222.06	138.47	205.36	144.92	197.49	168.44	168.44
LRWT_f5p0_868_transcript71299_g1	brown	34.36	29.01	29.57	153.62	130.6	141.8	70.03	111.57	129.58	47.6	29.73	31.64	61.24	71.53	71.53
LRWT_f6p0_1633_transcript40677_g1	brown	33.08	0	47.06	119.43	8.14	109.12	34.64	85.53	86.58	0	91.57	0	0	46.46	46.46
LRWT_f7p0_929_transcript68746_g1	brown	13.2	7.1	5.74	339.23	246.16	135.7	113.64	76.78	13.16	33.6	13.05	20.37	249.71	52.7	52.7
LRWT_f42p0_996_transcript64164_g2	brown	167.48	115.74	204.13	366.77	257.57	277.97	247.86	287.15	238.12	184.28	207.27	206.22	274.73	278.62	278.62
LRWT_f11p0_1348_transcript49086_g1	brown	213.88	188.65	217.5	278.56	271.35	457.81	401.18	468.03	317.78	292.87	287.74	296.92	226.87	249.31	249.31
LRWT_f2p0_733_transcript78244_g8	brown	74.46	96.32	90.19	154.55	201.58	237.05	173.55	199.27	163.02	95.43	91.16	93.38	156.86	132.59	132.59
LRWT_f23p0_572_transcript84056_g1	brown	65.98	63.49	52.39	206.97	213.57	175.17	135.41	97.2	81.74	52.5	42.77	38.51	149.95	91.59	91.59
LRWT_f28p0_680_transcript75921_g1	brown	75.24	27.59	19.5	58.66	224.75	244.47	123.49	128.8	106.05	16.84	39.6	30.3	102.51	29.85	29.85
LRWT_f15p0_1576_transcript40360_g1	brown	11.26	10.05	13.33	88.96	90.06	63.41	18.58	70.88	110.82	21.53	24.34	22.25	79.14	74.1	74.1
LRWT_f3p0_603_transcript85180_g5	brown	13.91	11.72	6.52	300.65	247.98	282.35	50.38	50.15	119.16	5.15	11.11	8.08	27.73	56.84	56.84
LRWT_f148p0_838_transcript71604_g1	brown	135.63	126.29	131.19	190.17	263.67	257.2	355.19	495.89	244.64	241.66	125.98	232.65	252.59	193.85	193.85
LRWT_f33p0_1150_transcript57320_g1	brown	156.15	144.39	114.22	221.19	214.12	233.71	185.23	154.39	171.93	125.44	121.44	133.16	165.16	203.92	203.92
LRWT_f4p0_591_transcript83290_g1	brown	38.53	35.28	39.64	173.9	144.09	99.18	91.02	74.72	186.34	77.81	62.29	62.5	59.93	119.78	119.78
LRWT_f19p0_701_transcript78734_g1	brown	144.01	160.89	139.99	349.35	225.68	275.45	219.93	230.31	176.5	220.39	172.1	252.81	183.21	230.48	230.48
LRWT_f11p0_1523_transcript42367_g1	brown	46.88	54.82	22.92	62.28	150.17	104.31	87.39	157.03	176.17	84.75	153.39	82.2	99.36	105.22	105.22
LRWT_f84p0_4677_transcript1586_g1	brown	37.13	7.45	5.86	119.88	83.27	78.8	117.08	195.86	22.12	111.13	66.53	13.19	41.73	4.51	4.51
LRWT_f37p0_688_transcript79088_g1	brown	84.26	95.87	91.54	229.16	188.47	219.11	131.14	167.63	151.46	118.29	118.81	122.95	154.85	198.99	198.99
LRWT_f3p0_1855_transcript34080_g4	brown	87.98	94.62	105.95	140.47	160.77	147.02	127.24	222.57	175.14	142.83	125.14	96.24	197.12	183.97	183.97
LRWT_f9p0_895_transcript66645_g1	brown	27.48	22.41	19.77	47.97	84.57	101.76	140.92	87.36	100.67	21.65	20.47	21.4	112.66	106	106
LRWT_f8p0_904_transcript69020_g1	brown	128.52	144.64	121.04	232.17	243.75	242.85	268.5	295.93	244.43	199.83	163.73	175.76	196.66	207.19	207.19
LRWT_f2p0_1471_transcript47096_g3	brown	126.66	74.62	131.83	108.07	181.6	159	197.96	186.59	367.69	104.02	205.59	111.27	135.67	145.23	145.23
LRWT_f28p0_1922_transcript30024_g1	brown	61.47	48.6	58.21	170.78	171.35	180.51	151.78	173.99	191.5	128.02	116.45	137.25	134.61	108.11	108.11
LRWT_f4p0_832_transcript73161_g2	brown	76.02	68.8	46.56	134.94	191.27	177.32	167.59	167.83	116.6	182.13	120.65	156.76	131.57	100.6	100.6
LRWT_f4p0_1879_transcript33392_g4	brown	58.08	60.26	77.93	55.09	102.1	139.54	153.34	142.47	211.58	49.83	92.63	124.7	158.05	106.48	106.48
LRWT_f3p0_643_transcript83564_g6	brown	18.65	20.19	9.65	118.24	117.25	78.81	17.39	53.13	99.78	40.8	23.43	32.29	97.17	175.51	175.51
LRWT_f20p0_537_transcript87145_g1	brown	54.13	55.38	12.36	107.96	132.21	76.79	23.24	35.05	180.68	112.47	27.92	19.79	90.69	90.3	90.3
LRWT_f5p0_730_transcript76118_g1	brown	23.66	35.91	25.79	154.13	125.2	84.27	37.04	106.21	111.74	8.1	13.58	14.79	58.89	69.51	69.51
LRWT_f10p0_683_transcript75614_g1	brown	35.52	23.61	35.27	305.78	132.47	224.32	50.95	92.25	97.09	34.23	15.85	22.6	46.83	112.08	112.08
LRWT_f5p0_1468_transcript45808_g1	brown	49.9	23.72	35.9	172.74	120.91	182.74	29.4	98.83	130.7	84.95	84.59	80.49	84.08	89.98	89.98
LRWT_f4p0_889_transcript67471_g1	brown	209.62	152.9	137.32	341.89	263.55	190.55	277.52	265.32	183.54	164.15	275.1	207.96	252.74	240.14	240.14
LRWT_f3p0_2146_transcript26945_g1	brown	44.4	45.03	48.43	178.28	141.99	166.32	78.62	100.89	186.7	61.21	39.42	56.78	83.21	103.15	103.15
LRWT_f15p0_248_transcript104878_g1	brown	81.76	55.56	120.53	165.23	81.29	200.55	75.6	39.12	133.09	48.48	65.79	12.07	42.73	116.01	116.01
LRWT_f2p0_624_transcript84036_g7	brown	125.24	168.62	98.73	226.66	235.92	186.78	136.61	125.73	276.96	134.39	159.94	130.21	137.57	217.95	217.95
LRWT_f16p0_764_transcript74439_g1	brown	365.08	280.11	278.53	515.66	394.76	359.08	380.54	353.66	418.66	339.32	377.11	343.21	408.45	426.9	426.9
LRWT_f2p0_605_transcript86282_g24	brown	15.7	21.43	33.79	77.75	103.47	41.59	105.59	125.15	60.69	105.17	40.57	60.58	104.36	67.33	67.33
LRWT_f2p0_1040_transcript64279_g22	brown	151.42	170.51	139.29	236.83	249.62	198.82	190.27	289.02	233.57	159.03	224.09	190.72	318.12	250.53	250.53
LRWT_f10p0_2140_transcript25107_g1	brown	85.67	83.89	85.44	134.14	193.88	205.08	169.75	184.03	170.9	113.93	118.83	138.15	113.83	99.25	99.25
LRWT_f30p0_1025_transcript64325_g1	brown	34.12	42.5	34.1	214.91	124.8	118.12	39.81	119.5	151.04	85.53	72.77	76.7	109.76	120.64	120.64
LRWT_f6p0_838_transcript71248_g1	brown	76.06	155.07	127.34	188.64	153.38	178	160.69	181.17	181.24	110.92	141.32	69.7	27.78	145.44	145.44
LRWT_f10p0_1010_transcript64314_g1	brown	103.08	100.13	81.83	161.52	153.25	185.77	186.14	179.2	181.02	122.06	99.98	137.67	139.83	214.73	214.73
LRWT_f11p0_1203_transcript56418_g1	brown	18.06	12.34	18.72	141.31	108.9	136.2	128.81	112.91	141.96	94.66	114.62	109	73.43	70.61	70.61
LRWT_f5p0_1239_transcript55843_g6	brown	37.27	21.45	16.79	67.63	88.77	144.97	178.92	165.81	118.21	69.37	81.03	86.94	142.99	120.81	120.81
LRWT_f191p0_1510_transcript42576_g1	brown	60.06	43.15	59.82	130.51	143.35	199.48	145.39	114.52	131.95	151.41	69.51	67.78	113.38	91.81	91.81
LRWT_f5p0_2432_transcript21664_g4	brown	45.73	17.07	34.98	98.34	81.39	133.25	192.84	130.3	276.91	66.75	103.54	80.8	49.32	110.04	110.04
LRWT_f2p0_2340_transcript23279_g3	brown	15.01	17.96	12.17	108.52	100.8	193.79	282.75	130.25	129.82	25.19	95.93	88.14	94.31	97.87	97.87
LRWT_f8p0_795_transcript73637_g2	brown	36.83	21.8	33.29	183.88	129.84	127.42	68.29	78.38	109.93	45.87	25.08	41.58	49.68	72.12	72.12
LRWT_f11p0_1478_transcript46044_g1	brown	8.04	11.92	9.91	79.97	94.55	105.05	131.92	91.51	130.87	46.92	35.24	38.02	68.16	78.32	78.32
LRWT_f2p0_850_transcript72622_g18	brown	8.16	11.87	10.8	161.12	73.73	145.65	50.92	42.18	81.78	13.35	7.42	7	25.63	62.92	62.92
LRWT_f5p0_672_transcript81178_g3	brown	34.97	15.26	34.79	106.69	84.94	186.79	55.3	112.24	52.97	24.7	18.5	24.21	80.29	96.6	96.6
LRWT_f4p0_2107_transcript27682_g3	brown	139.47	146.66	111.9	268.42	267.93	249.9	167.95	215.3	292.18	188.9	169.71	210.85	210.59	198.91	198.91
LRWT_f5p0_952_transcript67665_g5	brown	87.17	85.98	149.88	181.73	149.63	156.96	138.44	229.89	288.44	84.46	84.01	115.67	124.62	126.24	126.24
LRWT_f10p0_783_transcript73906_g1	brown	1.42	5.53	5.53	40.2	30.12	72.17	194.83	117.1	35.08	70.86	18.5	73.16	15.46	66.17	66.17
LRWT_f5p0_2111_transcript27553_g2	brown	137.36	144.71	125.36	261.63	248.51	226.9	163.2	200.29	270.41	211.43	193.68	204.84	191.54	175.49	175.49
LRWT_f24p0_960_transcript66853_g2	brown	39.81	68.53	55.5	87.86	119.04	81.92	91.63	128.24	155.75	81.91	83.46	81.06	122.84	118.34	118.34
LRWT_f3p0_729_transcript79054_g10	brown	45.7	60.9	13.94	15.51	56.26	90.56	86.22	91.69	99.11	14.46	29.18	60.63	120.39	60.2	60.2
LRWT_f10p0_719_transcript78598_g2	brown	2.98	5.89	3.63	83.08	143.93	72.76	21.5	36.22	181.74	31.55	12.44	16.12	131.09	53.6	53.6
LRWT_f9p0_1773_transcript34101_g1	brown	58.38	37.37	56.79	100.18	112.18	143.12	267.66	178.92	150.48	94.67	87.63	119.64	148.05	117.67	117.67
LRWT_f4p0_1180_transcript56467_g1	brown	41.07	58.83	46.4	147.63	127.7	132.68	78.49	102.27	117.02	44.68	58.29	55.94	100.61	85.91	85.91
LRWT_f6p0_659_transcript80350_g3	brown	7.72	61.75	19.2	47.19	106.58	70.03	104.71	71.94	37.66	26.83	35.15	122.85	30.14	91.67	91.67
LRWT_f9p0_558_transcript87465_g1	brown	76.36	89.35	82.61	243.29	146.03	151.45	105.56	150.7	154.85	116.24	116.07	115.11	151.68	166.8	166.8
LRWT_f2p0_2016_transcript29794_g7	brown	120.4	119.65	112.84	181.21	212.26	226.24	165.75	152.92	150.83	210.36	138.76	162.21	130.25	121.08	121.08
LRWT_f135p0_790_transcript72232_g1	brown	417.74	479.41	491.98	534.22	528.53	506.98	563.64	649.4	530.86	557.31	475.96	559.29	507.8	521.66	521.66
LRWT_f21p0_2529_transcript19116_g1	brown	16.49	14.82	13.71	123.89	124.8	144.15	44.45	65.69	92.57	16.48	11.1	14.15	37.13	52.76	52.76
LRWT_f19p0_1905_transcript32024_g1	brown	63.78	79.69	90.45	132.55	152.82	128.86	119.74	141.82	160.4	96.34	103.22	99.57	138.05	159.33	159.33
LRWT_f21p0_1581_transcript41806_g1	brown	6.4	2.26	5.29	69.05	74.85	60.28	34.28	39.84	87.16	12.37	9.33	8.15	57.58	47.12	47.12
LRWT_f3p0_899_transcript70178_g6	brown	12.31	13.8	16.3	79.35	87.48	105.49	140.77	92.2	102.43	42.61	42.99	42.43	57.89	41.89	41.89
LRWT_f4p0_496_transcript90947_g8	brown	69.92	80.6	50.79	193.03	103.75	110.74	226.26	255.82	157.87	186.52	151.9	163.84	176.32	179.29	179.29
LRWT_f4p0_2445_transcript21073_g1	brown	7.63	35.5	0.34	2.32	146.57	138.79	288.13	92.23	36.71	38.34	10.07	40.06	99.93	22.28	22.28
LRWT_f2p0_469_transcript92446_g11	brown	6.65	11.3	5.83	80.27	54.87	81.86	42.92	71.98	51.45	9.89	6.47	26.56	38.03	45.14	45.14
LRWT_f22p0_1003_transcript63416_g1	brown	20.13	51.12	39.93	175.43	136.07	140.94	159.02	170.7	228.68	99.63	112.21	119.44	157.51	169.84	169.84
LRWT_f11p0_1659_transcript40142_g1	brown	3.01	4.3	1.39	65.81	116.63	61.88	132.22	86.49	107.7	13.2	47.1	21.11	33.02	26.86	26.86
LRWT_f5p0_1429_transcript47528_g2	brown	172.54	140.38	119.38	239.69	168.19	212.36	196.85	231.39	272.62	178.87	168.7	184.74	201.37	260.86	260.86
LRWT_f6p0_799_transcript74781_g2	brown	39.58	27.39	37.88	111.81	115.28	94.88	83.18	91.3	102.06	50.84	18.02	52.64	78.36	93.42	93.42
LRWT_f2p0_1063_transcript63072_g14	brown	70.77	71.97	80.88	160.48	92.58	111.94	134.32	156.88	106.45	73.03	46.4	56.19	152.12	100.56	100.56
LRWT_f2p0_2086_transcript28208_g5	brown	319.79	307	290.2	330.51	387.8	308.98	329.47	413.42	373.35	328.25	257.37	343.19	379.9	359.09	359.09
LRWT_f2p0_622_transcript82942_g1	brown	112.02	56.34	108.84	164.22	161.47	232.11	214.63	96.21	77.74	123.01	130.05	71.38	94.37	122.92	122.92
LRWT_f25p0_1303_transcript52276_g2	brown	48.09	47.22	52.64	117.21	108.1	123.18	113.02	124.45	162.03	128.17	83.24	75.81	110.8	141.24	141.24
LRWT_f7p0_907_transcript69749_g1	brown	95.73	50.73	19.51	80.68	120.69	90.9	130.05	165.26	129.12	110.05	152.37	130.39	206.3	124.39	124.39
LRWT_f13p0_647_transcript82223_g1	brown	164.73	195.2	162.79	266.46	254.12	268.44	226.24	260.27	233.32	257.82	195.33	225.61	262.26	300.94	300.94
LRWT_f2p0_2682_transcript17647_g4	brown	225.24	226.92	182.32	276.73	248.03	256.6	218.03	368.61	286.95	200.1	192.14	222.4	264.85	197.95	197.95
LRWT_f2p0_1600_transcript42644_g14	brown	62.86	54.37	64.39	125.27	102.39	91.33	114.93	107.65	154.39	111.76	83.23	79.15	134.83	152.06	152.06
LRWT_f20p0_1540_transcript43749_g2	brown	33.44	38.8	33.9	102.92	140.41	146.97	163.89	119.79	175.85	67.63	89.97	94.58	99.8	86.78	86.78
LRWT_f4p0_409_transcript95254_g6	brown	48.84	46.6	78.57	146.57	121.97	118.07	113.76	66.25	102.1	60.47	51.43	93.59	66.36	93.18	93.18
LRWT_f2p0_479_transcript91884_g3	brown	41.69	35.1	55.73	267.73	127.24	171.99	61.78	251.75	143.81	81.37	49.31	10.18	213.67	44.38	44.38
LRWT_f9p0_1057_transcript63231_g2	brown	124.1	139.34	142.89	227.64	196.16	204.18	161.2	195.06	180.16	132.97	137.74	141.99	179.45	206.12	206.12
LRWT_f2p0_1366_transcript50972_g4	brown	50.74	66.07	94.09	113.8	112.78	97.15	39.5	61.23	133.36	89.49	45.9	38.6	93.25	42.71	42.71
LRWT_f5p0_989_transcript65370_g1	brown	309.34	358.84	336.07	475.64	404.83	415.9	357.67	399.38	295.45	329.08	387.75	352.99	401.22	384.15	384.15
LRWT_f2p0_820_transcript73943_g20	brown	4.63	25.9	29.16	61.13	43.06	61.17	69.06	69.18	42.73	13.98	44.53	13.69	93.38	13.77	13.77
LRWT_f2p0_1259_transcript55343_g9	brown	6.1	4.63	14.01	42.85	33.89	5.05	82.45	4.27	64.86	4.73	42.74	3.53	67.71	31.36	31.36
LRWT_f143p0_2006_transcript27546_g1	brown	94.57	92.76	127.64	220.73	212.2	241.72	175.83	214.15	224.91	171.19	141.91	172.92	202.06	205.87	205.87
LRWT_f29p0_1645_transcript38952_g1	brown	7.88	11.02	9.1	57.17	65.49	26.75	38.18	42.14	67.92	29.95	25.17	23.89	64.35	67.25	67.25
LRWT_f12p0_615_transcript83943_g2	brown	105.09	89.09	58.21	231.67	114.08	121.68	131.26	133.13	159.56	51.87	85.14	153.19	221.27	147.18	147.18
LRWT_f2p0_594_transcript85690_g16	brown	89.96	127.2	53.22	187.16	142.51	112.31	87.34	198.98	86.42	147.38	52.02	94.84	69.13	126.52	126.52
LRWT_f28p0_1193_transcript54506_g1	brown	67.57	69.08	98.5	152.73	155.54	156.19	129.92	147.78	159.87	226.24	116.51	129.8	90.52	114.76	114.76
LRWT_f137p0_870_transcript69497_g1	brown	0.09	1.32	0.37	63.1	58.14	71.78	109.1	27.04	90.35	32.68	10.83	45.64	15.18	19.59	19.59
LRWT_f2p0_704_transcript79674_g3	brown	21.67	31.36	27.72	207.66	157.07	152.34	28.67	49.75	68.49	22.07	8.22	10.25	39.94	65.56	65.56
LRWT_f75p0_1716_transcript35485_g1	brown	15.09	8.31	81.84	85.36	190.03	172.81	55.15	43.62	79.11	20.87	17.75	40.26	87.85	69.21	69.21
LRWT_f2p0_810_transcript74307_g2	brown	18.94	29.38	55.83	137.67	118.13	112.18	30.95	55.5	82.81	56.44	31.32	42.13	149.23	67.82	67.82
LRWT_f4p0_1845_transcript34228_g4	brown	112.81	148.26	154.83	263.04	313.46	306.87	243.8	166.03	257.37	247.25	154.8	173.62	176.55	169.9	169.9
LRWT_f2p0_816_transcript74199_g19	brown	202.21	222.17	200.35	287.86	254.95	274.66	270.13	292.25	307.15	235.65	267.13	265.37	257.1	296.61	296.61
LRWT_f7p0_2173_transcript24806_g1	brown	150.83	138.02	157.99	182.8	202.61	184.62	134.22	198.85	319.06	109.91	118.68	108.8	135.32	165.29	165.29
LRWT_f2p0_1743_transcript37889_g12	brown	51.74	0	0.06	279.99	278.66	0	24.73	106.9	111.57	0.98	0.14	113.57	137.6	0.06	0.06
LRWT_f2p0_986_transcript66346_g7	brown	52.54	95.1	77.78	144.4	124.25	121.78	112.92	133.85	87.28	121.52	99.94	97.19	22.48	68.95	68.95
LRWT_f3p0_2485_transcript20868_g1	brown	3.04	8.41	3.54	42.86	27.87	53.47	30.78	100.95	99.47	53.12	11.21	22.94	55.34	67.34	67.34
LRWT_f20p0_736_transcript75934_g1	brown	151.53	184.17	185.21	261.86	245.54	221.82	206.14	288.29	224.08	246.9	250.51	246.24	217.34	208.62	208.62
LRWT_f4p0_1251_transcript55508_g4	brown	47.41	5.99	33.88	150.53	171.97	151.81	122.91	144.93	196.49	117.19	120.53	136.13	109.85	113.15	113.15
LRWT_f2p0_1256_transcript54550_g3	brown	15.97	64.45	3.35	41.49	37.81	148.59	79.53	70.14	186.06	54.08	2.28	67.21	56.57	29.68	29.68
LRWT_f15p0_829_transcript69365_g1	brown	18.48	39.46	32.54	92.92	146.37	208.09	84.32	117.64	74.73	67.14	36.86	42.85	29.82	42.42	42.42
LRWT_f3p0_1400_transcript49800_g3	brown	65.51	75.38	66.61	128.29	145.09	106.41	111.7	121.6	168.83	89.53	83.11	94.3	107.25	150.91	150.91
LRWT_f38p0_1268_transcript53067_g1	brown	106.24	96.67	98.95	208.63	217.49	179.24	168.56	160.54	120.77	75.6	125.93	113.8	216.76	104.32	104.32
LRWT_f7p0_2247_transcript23223_g1	brown	41.21	36.75	43.04	117.33	123.58	120.74	102.55	95.52	101.47	57.01	53.48	50.32	51.36	65.28	65.28
LRWT_f13p0_1169_transcript56733_g2	brown	126.34	40.76	91.26	61.25	138.75	84.5	94.11	83.12	147.39	56.31	44.12	35.26	107.01	75.54	75.54
LRWT_f4p0_2921_transcript13288_g1	brown	122.09	133.87	109.93	217.28	238.49	227.83	145.96	176.88	123.15	118.79	121.47	97.95	121.72	57.89	57.89
LRWT_f3p0_1646_transcript40715_g2	brown	29.61	18.61	33.39	77.11	103.33	96.24	108.26	53.35	78.97	50.29	56.13	97.71	20.64	29.87	29.87
LRWT_f2p0_2552_transcript19771_g3	brown	26.58	64.02	64.82	51.94	57.84	90.03	89.53	64.05	58.28	25.84	26.72	51.42	81.6	30.09	30.09
LRWT_f8p0_1099_transcript59765_g1	brown	15.59	21.1	16.31	55.82	55.83	28.98	66.35	66.83	86.92	79.48	27.13	20.12	48.56	57.31	57.31
LRWT_f3p0_972_transcript66692_g2	brown	89.57	0.12	16.73	57	53.45	58.5	86.04	0	67.46	40.56	27.45	3.73	14.83	44.04	44.04
LRWT_f34p0_1604_transcript39488_g1	brown	125.82	207.62	143.9	188.48	167.54	214.83	248.33	161.98	179.25	74.15	190.94	143.93	190.79	161.96	161.96
LRWT_f38p0_888_transcript69330_g1	brown	32.89	35.68	67.56	109.02	69.35	92.13	84.85	121.03	57.35	65.56	122.67	28.58	98.61	68.84	68.84
LRWT_f5p0_847_transcript70859_g1	brown	34.38	35.81	31.33	93.55	67.6	86.7	65.34	88.53	63.04	63.42	24.33	41.47	12.94	86.4	86.4
LRWT_f2p0_2979_transcript13718_g2	brown	85.97	62.34	54.57	153.59	163.51	120.38	30.46	59.61	130.67	50.45	53.36	81.78	38.98	36.5	36.5
LRWT_f10p0_701_transcript78543_g2	brown	283.01	338.39	329.44	537.66	402.72	463.15	394.14	418.13	394.91	381.56	382.01	422.41	456.23	425.83	425.83
LRWT_f16p0_2177_transcript25530_g1	brown	71.09	53.15	110.41	86.84	118.97	218.97	169.9	120.77	105.26	116.91	67.21	110.87	79.09	133.92	133.92
LRWT_f4p0_2228_transcript25286_g5	brown	71.53	71.39	71.41	130.96	139.38	127.71	120.29	129.74	129.7	110.86	104.69	101.82	100.39	85.54	85.54
LRWT_f17p0_1202_transcript54097_g1	brown	30.06	35.53	28.56	127.37	121.53	90.28	85.04	128.5	152.82	112.28	98.78	111.56	130.38	94.08	94.08
LRWT_f139p0_2008_transcript27872_g1	brown	96.45	26.19	75.69	127.22	90.87	62.12	81.05	165.72	68.21	45.12	84.76	41.3	42.52	62.27	62.27
LRWT_f4p0_1461_transcript47501_g4	brown	4.43	7.21	6.08	101.66	166.23	65.76	61.02	109.81	99.84	46.35	68.82	70.37	61.9	83.29	83.29
LRWT_f3p0_542_transcript88548_g6	brown	37.09	35.27	46.81	144.98	150.03	181.85	183.48	137.99	128.71	115.63	115.55	122.52	115.61	99.03	99.03
LRWT_f4p0_1327_transcript52308_g8	brown	3.88	3.96	5.4	60.81	67.73	53.43	34.03	41.15	57.09	20.8	18.61	18.99	61.25	64.4	64.4
LRWT_f50p0_848_transcript70506_g1	brown	16.34	59.25	37.64	118.57	78.49	121.17	98.6	79.56	57.06	208.66	47.25	92.47	63.36	69.32	69.32
LRWT_f2p0_2472_transcript21036_g4	brown	143.99	117.22	128.48	202.26	233.57	267.61	218.88	196.63	207.68	202.9	196.94	209.77	154.01	224.97	224.97
LRWT_f5p0_1865_transcript33413_g2	brown	52.6	57.19	60.23	121.73	133.73	133.25	105.86	116.99	137.75	111.2	65.96	99.86	78.42	120.89	120.89
LRWT_f2p0_670_transcript81571_g7	brown	16.21	42.84	14.83	39.24	88.84	120.41	62.33	57.57	37.5	7.04	5.49	6.98	34.54	12.54	12.54
LRWT_f2p0_479_transcript92525_g21	brown	36.17	30.22	26.31	95.2	77.47	98.76	51.39	18.33	56.33	17.06	40.2	18.27	17.51	73.57	73.57
LRWT_f9p0_1264_transcript53895_g2	brown	24.04	5.4	18.73	41.96	53.16	72.11	91.52	52.36	99.91	87.64	55.59	104.34	117.49	69.69	69.69
LRWT_f30p0_1482_transcript46297_g1	brown	2.38	3.1	10.32	0.62	1.88	138.52	240.7	168.16	41.16	38.55	9.66	22.83	33.56	31.14	31.14
LRWT_f3p0_1139_transcript60054_g6	brown	33.82	34.91	46.46	99.27	157.12	129.25	34.57	24.98	128.57	41.15	27.77	34.98	95.57	107.48	107.48
LRWT_f2p0_1404_transcript49960_g11	brown	13.54	15.99	16.26	105.5	70.73	71.4	121.01	129.19	86.39	40.54	44.74	49.13	62.67	49.97	49.97
LRWT_f2p0_1267_transcript54825_g4	brown	22.97	22.8	31.37	155.1	171.77	100.6	75.97	102.65	167.62	90.52	100.96	83.63	86.01	64.88	64.88
LRWT_f20p0_932_transcript65754_g1	brown	33.88	57.08	61.44	100.15	67.11	115.86	98	94.31	123.5	115.55	31.73	75.3	74.18	88.18	88.18
LRWT_f4p0_618_transcript84196_g3	brown	65.65	6.83	57.43	144	41.06	62.04	127.59	10.01	98.31	51.31	8.56	28.96	39.68	40.23	40.23
LRWT_f5p0_2165_transcript26536_g1	brown	85.71	72.03	30.07	27.39	186.95	49.93	77.97	213.22	117.83	8.18	65.12	58.74	77.59	44.2	44.2
LRWT_f5p0_1687_transcript39279_g2	brown	64.29	43.49	22.88	112.71	145.08	33.53	40.23	92.03	133.57	43.71	59.67	38.82	20.64	64.22	64.22
LRWT_f2p0_497_transcript90287_g1	brown	45.99	61.78	38.63	101.93	103.5	65.1	39.41	64.42	66.66	55.3	39.73	40.95	49.86	103.04	103.04
LRWT_f5p0_589_transcript85640_g7	brown	99.68	57.52	77.2	143.24	105.22	98.37	78.16	138.99	137.03	78.77	60.47	56.46	53.96	78.26	78.26
LRWT_f5p0_2436_transcript20675_g1	brown	31.14	37.22	26.67	72.95	87.3	66.72	69.35	96.97	137.51	58.42	102.15	105.03	59.97	56.4	56.4
LRWT_f8p0_1156_transcript55874_g1	brown	50.58	60.23	61.77	98.38	150.65	131.88	202.81	124.7	70.21	102.93	90.7	86.72	103.12	88.24	88.24
LRWT_f3p0_1534_transcript44447_g2	brown	5.88	17.12	15.36	68.99	31.52	104.38	43.24	71.74	69.04	23.22	18.74	11.18	17.35	53.01	53.01
LRWT_f3p0_1323_transcript52634_g6	brown	24.14	24.82	16.37	114.99	119.85	115.37	108.01	109.27	92.94	33.34	39.75	22.48	139.96	128.35	128.35
LRWT_f3p0_416_transcript93743_g1	brown	16.06	5.76	3.46	231.81	82.98	34.14	24.51	88.33	121.19	44.13	24.45	41.63	48.01	64.44	64.44
LRWT_f3p0_1969_transcript31018_g1	brown	17.01	18.86	23.21	47.13	51.34	92.13	113.46	95.41	55.52	12.12	10.7	14.89	63.52	37.26	37.26
LRWT_f2p0_1464_transcript47525_g11	brown	27.64	23.22	31.11	51.79	72.18	52.73	70.32	49.92	94.66	17.93	43.17	16.1	50.42	20.66	20.66
LRWT_f2p0_868_transcript71612_g7	brown	24.87	37.41	26.61	61.99	83.01	69.56	49.89	53.05	63.12	23.48	40.03	22.94	48.52	70.6	70.6
LRWT_f2p0_2266_transcript24618_g6	brown	30.02	32.55	47.93	54.72	80.14	103.24	102.82	91.34	115	58.08	55.2	60.36	107.12	60.48	60.48
LRWT_f43p0_902_transcript65419_g1	brown	52.67	33.96	28.86	118.62	104.69	114.43	122.11	137.12	137.05	83.75	94.81	106.75	134.77	128.45	128.45
LRWT_f58p0_1753_transcript34598_g1	brown	100.05	118.42	92.14	146.86	167.96	170.32	118.67	162.85	175.65	161.84	123.39	137.57	148.34	153.23	153.23
LRWT_f11p0_994_transcript64908_g2	brown	51.13	69.47	48.39	127.05	113.74	68.51	48.24	57.67	110.11	74.75	67.75	70.71	73.21	92.17	92.17
LRWT_f2p0_1358_transcript51292_g8	brown	40.7	46.77	45.5	128.43	66.59	99.72	65.51	89.74	58.94	84.23	39.06	67.78	47.05	79.48	79.48
LRWT_f2p0_652_transcript82624_g11	brown	14.1	8.62	11.56	19.21	67.03	79.9	122.08	85.92	148.77	54.73	65.85	60.38	63.42	50.68	50.68
LRWT_f11p0_1806_transcript34860_g2	brown	26.24	32.4	25.75	82.94	99.61	86.51	93.82	68.56	87.94	63.46	54.83	50.79	78.75	55.33	55.33
LRWT_f3p0_2827_transcript15767_g4	brown	42.23	45.59	45.92	81.3	92.62	78.88	65.34	97.28	92.11	39.24	57.04	41.79	61.81	66.1	66.1
LRWT_f3p0_1136_transcript60231_g6	brown	254.62	247.8	254.22	299.9	285.77	274.8	276.53	278.85	286.92	243.27	256.46	254.03	249.42	235.3	235.3
LRWT_f28p0_1652_transcript37356_g1	brown	25.76	29.23	21.23	55.98	84.92	75.25	91.57	77.81	144.25	66.67	54.1	64.13	40.43	43.99	43.99
LRWT_f17p0_996_transcript65237_g1	brown	60.69	62.83	61.76	122.72	126.82	134.52	101.94	102.84	77.55	65.21	72.82	69.6	82.69	86.02	86.02
LRWT_f7p0_649_transcript82515_g1	brown	28.99	15.99	19.99	48.82	81.48	37	17.77	51.72	78.62	51.12	22.62	30.79	41.86	67.55	67.55
LRWT_f5p0_913_transcript67093_g1	brown	23.79	20.79	9.12	50.14	90.98	70.75	26.28	57.2	15.22	40.67	34.19	72.07	45.45	56.29	56.29
LRWT_f11p0_685_transcript79203_g1	brown	32.97	23.56	28.87	49.94	87.46	118.73	33.89	74.56	89.52	67.03	58.79	55.41	62.57	54.14	54.14
LRWT_f4p0_241_transcript105440_g6	brown	0	29.04	9.96	89.45	48.83	59.23	0	67.87	13.46	0	47.25	37.11	40.61	29.69	29.69
LRWT_f6p0_1779_transcript35969_g2	brown	15.46	12.36	14.08	68.87	100.39	99.87	71.65	76.02	106.17	57.05	36.8	45.16	64.47	56.65	56.65
LRWT_f3p0_1462_transcript47689_g4	brown	238.86	238.68	251.22	293.39	286.96	270.67	290.47	336.06	305.71	247.07	216.87	242.1	290	299.54	299.54
LRWT_f2p0_710_transcript79436_g2	brown	46.76	58.18	53.53	100.81	71.13	78.74	86.59	91.47	76.84	58.64	54.99	55.47	84.64	96.77	96.77
LRWT_f8p0_1177_transcript56942_g1	brown	122.96	87.3	119.36	164.81	142.79	144.15	99.44	124.13	129.39	129.18	119.13	119.5	103.49	160.45	160.45
LRWT_f27p0_1751_transcript36198_g1	brown	43.55	23.73	37.47	87.61	75.28	91.24	90.2	87.58	67.76	71.1	47.13	56.25	59.79	65.73	65.73
LRWT_f6p0_2456_transcript21235_g2	brown	73.26	65.98	68.82	82.38	111.06	128.19	111.91	108.1	118.02	91.05	87.46	86.05	69.12	67.48	67.48
LRWT_f51p0_707_transcript77136_g2	brown	141.42	164.06	140.25	199.26	163.33	200.95	163.43	176.28	116.2	134.46	134.16	166.8	144.87	181.9	181.9
LRWT_f14p0_1282_transcript53279_g1	brown	24.91	6.38	11.54	62.72	137.81	185.36	218.45	149.76	7.61	7.97	70.83	22.34	100.08	24.01	24.01
LRWT_f3p0_1209_transcript57283_g2	brown	90.96	85.07	119.78	136.59	155.09	161.53	113.62	151.9	165.85	129.93	306.89	185.55	148.87	126.42	126.42
LRWT_f3p0_1642_transcript41104_g3	brown	6.96	19.22	3.28	68.89	62.13	22.34	46.9	43.14	22.47	37.68	18.89	8.52	81.19	40.59	40.59
LRWT_f2p0_850_transcript72400_g7	brown	35.07	24.52	19.25	61.43	76.86	69.94	70.15	46.73	53.82	26.3	51.48	39.44	45.16	78.21	78.21
LRWT_f5p0_957_transcript67425_g3	brown	71.2	44.11	25.9	97.07	96.69	61.62	32.42	60.74	84.7	90.24	50.84	43.84	69.26	87.21	87.21
LRWT_f2p0_1557_transcript43632_g3	brown	55.96	52.19	113.4	100.96	97.85	106.74	65.47	95.67	110.05	58.66	72.27	80.07	64.74	114.02	114.02
LRWT_f2p0_1742_transcript37601_g5	brown	33.13	26.59	26.5	59.01	65.05	84.95	110.28	68.95	103.09	49.78	64.89	55.08	52.25	83.22	83.22
LRWT_f3p0_4228_transcript3375_g1	brown	15.83	15.14	13.11	42.55	65.15	70.31	74.6	52.46	94.44	61.14	43.89	49.12	34.13	25.58	25.58
LRWT_f6p0_1453_transcript47506_g4	brown	69.47	66.38	48.97	83.92	140.51	70.77	133.99	84.39	105.12	52.43	63.74	65.65	124.61	96.43	96.43
LRWT_f2p0_1623_transcript41780_g12	brown	18.48	35.62	42.25	56.17	101.51	35.34	78.01	53.82	88.5	43.07	19.73	81.24	36.6	63.99	63.99
LRWT_f3p0_795_transcript75091_g1	brown	38.11	26.93	25.87	112.53	87.64	70.95	74.32	54.35	36.04	23.47	31.03	5.15	52.39	17.84	17.84
LRWT_f2p0_1236_transcript56358_g14	brown	112.36	128.64	102.84	146.72	156.78	159.93	165.08	128.14	125.48	102.7	106.19	107.28	129.66	130.14	130.14
LRWT_f3p0_308_transcript101555_g3	brown	29.2	27.23	5.44	88.47	121.29	108.41	40.7	119.79	24.15	23.14	12.41	23.92	74.68	58.72	58.72
LRWT_f3p0_1187_transcript58197_g3	brown	8.61	9.42	0	20.91	166	73.53	18.74	195.63	0.53	10.87	36.74	69.59	227.11	13.32	13.32
LRWT_f11p0_1204_transcript53359_g1	brown	86.84	101.23	100.38	160.79	161.57	213.27	174.83	142.09	164.63	165.29	130.95	126.12	154.12	143.57	143.57
LRWT_f3p0_812_transcript74259_g7	brown	7.04	26.65	9.94	118.13	59.5	47.37	33.88	53.74	42.39	6.41	8.17	9.58	39.64	35.8	35.8
LRWT_f21p0_604_transcript83666_g1	brown	96.56	90.02	39.15	205.99	109.81	83.02	36.27	89.71	129.15	65.14	38.75	58.65	95.24	74.84	74.84
LRWT_f4p0_2745_transcript16659_g2	brown	0	2.87	0	0	17.82	21.77	26.07	38.75	57.22	67.19	4.41	1.18	0	50	50
LRWT_f2p0_951_transcript67859_g9	brown	92.34	96.44	111.42	116.19	169.12	284.52	131.69	266.3	144.08	137.28	144.5	101.15	122.35	134.01	134.01
LRWT_f2p0_1894_transcript33081_g6	brown	4.03	5.95	3.79	47.54	60.21	55.66	73.21	34.94	83.86	29.81	18.63	18.05	33.99	28.03	28.03
LRWT_f7p0_1543_transcript44246_g3	brown	11.78	15.36	11.95	48.99	50.43	81.01	62.06	54.07	48.83	35.15	18.71	15.91	26.47	44.39	44.39
LRWT_f10p0_1481_transcript45469_g1	brown	10.73	9.13	8.75	46.38	60.58	33.9	26.39	35.51	49.87	16.4	21.2	19.94	64.98	72.08	72.08
LRWT_f2p0_3114_transcript12230_g4	brown	19.57	18.94	22.27	62.48	59.65	48.47	24.73	58.48	83.3	40.28	22.9	27.55	33.63	41.64	41.64
LRWT_f6p0_923_transcript68945_g6	brown	46.12	32.92	85.67	100	72.88	43.28	62.65	68.02	82.19	41.6	39.59	27.39	19.15	58.94	58.94
LRWT_f3p0_1813_transcript35115_g1	brown	106.53	97.22	79.61	90.15	123.26	173.14	171.29	176.1	146.59	127.9	115.17	95.08	91.18	112.39	112.39
LRWT_f4p0_1188_transcript56180_g2	brown	149.63	154.5	134.37	204.83	183.27	183.55	181.51	199.04	168.4	149.35	163.03	153.75	194.43	145.72	145.72
LRWT_f2p0_1536_transcript44635_g4	brown	32.58	28.85	40.98	64.73	59.7	81.39	58.24	43.38	40.42	17.73	20.77	31.03	38.59	64.92	64.92
LRWT_f2p0_645_transcript82861_g5	brown	88.09	87.82	101.66	159.96	156.61	169.69	106.91	131.6	134.05	98.54	103.99	86.01	115.71	120.41	120.41
LRWT_f2p0_599_transcript85506_g17	brown	69.16	77.88	62.3	140.75	104.96	113.47	100.71	93.55	79.78	96.19	75.94	103.07	100.14	117.28	117.28
LRWT_f3p0_614_transcript83141_g1	brown	14.34	21.19	18.37	84.96	56.37	63.14	39.17	81.02	60.71	48.23	39.24	23.64	71.06	69.65	69.65
LRWT_f2p0_606_transcript85006_g8	brown	18.99	5.79	7.06	63.17	71.03	57.44	52.28	27.15	86.26	48.64	7.02	28.63	26.21	43.25	43.25
LRWT_f5p0_1886_transcript32955_g3	brown	21.86	20.79	23.3	66.45	55.96	89.2	100.06	67.88	72.01	46.39	42.6	49.47	71.26	69.31	69.31
LRWT_f36p0_851_transcript69649_g1	brown	173.98	150.28	184.87	243.92	230.62	204.86	212.07	244.74	210.07	208.2	175.31	198.51	210.97	187.99	187.99
LRWT_f2p0_1359_transcript51259_g6	brown	1.71	1.06	13.52	124.12	60.47	50.72	42.8	11.7	27	5.52	14.92	10.15	90.88	27.44	27.44
LRWT_f4p0_792_transcript75146_g4	brown	75	84.54	75.62	120.5	107.96	115.2	77.32	113.25	98.91	87.03	76.36	75.86	122.31	115.47	115.47
LRWT_f18p0_1191_transcript56915_g2	brown	76.49	66.89	73.87	121.85	93.49	109.47	88.22	105.16	102.03	78.6	76.94	83.3	113.6	117.09	117.09
LRWT_f6p0_1482_transcript45807_g2	brown	99.39	89.93	91.56	105.97	139.77	162.06	113.25	128.36	129.92	90.94	74.36	87.36	107.48	123.03	123.03
LRWT_f3p0_838_transcript73418_g6	brown	80.17	97.29	93.9	132.45	110.44	119.78	89.99	115.53	114.37	81.44	78.52	88.83	117.42	126.69	126.69
LRWT_f6p0_1738_transcript37485_g2	brown	85.45	59.71	89.93	118.1	103.73	115.71	101.9	96.89	136.53	113.13	73.94	117.21	113.54	129.82	129.82
LRWT_f2p0_811_transcript75089_g16	brown	50.97	43.65	39.56	96.63	101.06	79.05	43.84	66.24	77.24	33.57	45.06	51.4	33.8	67.53	67.53
LRWT_f8p0_725_transcript77570_g2	brown	95.49	104.57	92.96	125.98	196.41	132.58	122.45	106.84	143.21	74.58	84.71	83.54	90.74	112.25	112.25
LRWT_f9p0_1035_transcript63986_g1	brown	57.77	60.4	79.92	107.98	91.92	106.11	16.02	34.99	122.79	47.3	72.79	105.05	91.96	100.45	100.45
LRWT_f3p0_3136_transcript11912_g2	brown	0	0	0	0	32.77	35.38	30.86	78.47	16.71	24.99	0.79	2.36	0	31.35	31.35
LRWT_f5p0_1277_transcript54278_g3	brown	55.18	66.63	85.66	145.83	99.92	102.53	106.71	110.79	80.06	80.95	77.01	110.52	80.25	82.66	82.66
LRWT_f45p0_931_transcript65793_g1	brown	125.97	133.85	134.91	150.48	132.93	159.42	175.41	187.23	181.71	175.02	138.92	173.98	143.8	169.54	169.54
LRWT_f32p0_1458_transcript44281_g1	brown	59.48	53.26	80.9	113.24	106.99	133.43	189.99	121.58	153.44	100.77	97.35	105.06	133.22	124.16	124.16
LRWT_f2p0_739_transcript78177_g15	brown	12.98	16.38	19.72	90.61	56.76	46.59	23.06	25.39	94.26	32.24	14.34	24.5	38.72	65.91	65.91
LRWT_f10p0_1556_transcript42899_g1	brown	90.17	95.18	107.06	139.32	123.38	145.62	149.29	122.9	135.94	100.27	89.59	113.6	117.2	124.22	124.22
LRWT_f2p0_1931_transcript32173_g8	brown	7	9.41	7.77	18.4	34.3	71.92	49.93	32.33	78.74	42.74	53.61	129.55	63.64	47.92	47.92
LRWT_f3p0_1148_transcript60410_g4	brown	48.82	7.32	44.01	77.34	82.32	50.14	109.93	39.66	60.31	57.94	19.55	59.72	102.88	62.19	62.19
LRWT_f9p0_1660_transcript39831_g1	brown	24.2	18.35	22.52	42.3	49.57	94.83	108.66	60.06	110.67	26.61	26.8	33.36	32.21	57.22	57.22
LRWT_f7p0_1299_transcript53618_g3	brown	1.12	0.94	3.65	49.74	41.37	12.64	62.08	34.87	34.11	52.5	13.21	43.37	46.09	25.32	25.32
LRWT_f2p0_1732_transcript37923_g6	brown	41.27	43.07	42.41	83.21	95.13	102.14	109.46	105.12	127.45	68.7	65.95	82.71	89.6	91.23	91.23
LRWT_f22p0_2091_transcript27035_g1	brown	16.35	12.4	17.96	68.48	51	41.9	33.82	34.36	32.16	12.64	17.71	15.56	59.25	33.22	33.22
LRWT_f11p0_1051_transcript62880_g1	brown	34.54	40.22	42.91	109.08	90.88	85.72	57.6	73.03	55.71	38.47	49.25	45.06	85.32	66.18	66.18
LRWT_f2p0_1802_transcript35624_g3	brown	90.19	66.3	79.74	93.35	115.4	106.98	94.78	95.51	106.86	109.01	77.44	89.28	74.93	74.13	74.13
LRWT_f2p0_566_transcript87137_g3	brown	1.56	8.46	15.07	74.32	42.72	87.86	57.68	8.16	60.68	0	34.65	15.17	92.51	5.33	5.33
LRWT_f3p0_629_transcript83748_g3	brown	68.76	24.96	61.53	152.7	154.82	85.98	63.95	70.02	85.17	78.85	27.98	71.66	84.07	40.73	40.73
LRWT_f2p0_1357_transcript51324_g4	brown	54.72	28.82	20.61	81.98	70.91	63.76	94.13	60.85	46.09	38.86	45.75	31.26	99.13	61.51	61.51
LRWT_f11p0_2103_transcript27394_g1	brown	49.52	63.5	57.93	94.36	118.71	111.35	90.41	110.19	107.78	116.93	92.68	95.19	78.22	78.29	78.29
LRWT_f2p0_1204_transcript57485_g7	brown	47.7	70.62	89.5	81.02	107.08	147.5	107.36	114.72	135.03	120.93	114.04	90.66	84	92.28	92.28
LRWT_f2p0_890_transcript70860_g12	brown	179.84	177	159.13	259.02	211.03	200.75	175.23	195.98	184.83	162.32	221.67	188.08	200.43	202.43	202.43
LRWT_f3p0_2569_transcript19747_g4	brown	50.14	42.44	39.82	65.13	108.52	39.7	113.95	111.71	60.75	58.8	18.05	29.18	66	35.1	35.1
LRWT_f11p0_960_transcript66361_g1	brown	8.07	52.22	34.53	21.33	79.66	75.9	37.91	63.2	57.49	50.58	16.16	23.32	99.42	48.23	48.23
LRWT_f8p0_1172_transcript56626_g2	brown	88.87	82.68	95.01	136.07	129.15	160.77	132.6	153.23	173.83	114.3	111.67	128.28	119.67	132.22	132.22
LRWT_f3p0_897_transcript70138_g1	brown	19.3	14.29	9.32	62.68	44.64	66.78	25.09	32.13	39.61	9.38	9.43	11.61	29.88	31.52	31.52
LRWT_f2p0_727_transcript78620_g8	brown	5.72	19.17	4.42	23.64	18.54	40.7	6.96	51.87	82.08	11.09	1.02	9.41	39.98	35.34	35.34
LRWT_f2p0_266_transcript104321_g15	brown	15.95	0	22.62	26.5	29.73	27.41	0	92.98	3.58	15.75	0	15.03	0	0	0
LRWT_f7p0_680_transcript79940_g2	brown	30.42	27.4	26.78	97.81	39.39	19.2	26.53	47.36	45.01	23.86	7.58	1.95	0	42.04	42.04
LRWT_f25p0_2332_transcript21931_g1	brown	60.46	65.55	75.63	86.48	96.27	82.95	74.7	85.1	97.57	48.84	59.46	63.92	94.46	97.68	97.68
LRWT_f2p0_2234_transcript25176_g2	brown	50.87	39.9	29.47	104.5	60.76	77.11	14.12	25.72	100.94	54.16	54.43	68.76	120.24	46.55	46.55
LRWT_f2p0_3607_transcript6652_g1	brown	60	49.88	50.99	82.29	97.42	76.69	54.21	90.19	119.34	56.19	54.61	52.71	76.98	69.2	69.2
LRWT_f16p0_1911_transcript32248_g1	brown	61.7	58.19	63.17	84.09	85.14	85.07	115.35	95.86	122.76	75.74	61.5	76.2	76.44	98.6	98.6
LRWT_f19p0_3159_transcript10510_g1	brown	46.11	42.03	46.56	46.23	89.89	71.52	133.32	79.57	93.99	34.29	45.57	31.79	64.85	50.35	50.35
LRWT_f13p0_798_transcript73966_g3	brown	159.11	181.38	175.34	280.23	226.54	227.9	192.32	213.47	172.6	168.9	190.91	179.66	208.08	187.04	187.04
LRWT_f3p0_2017_transcript29950_g1	brown	127.36	145.24	141.53	130.3	177.9	164.45	172.43	169.48	161.66	130.68	172.85	122.83	164.21	155.12	155.12
LRWT_f17p0_2090_transcript26512_g1	brown	313.26	225.37	293.57	322.38	310.9	344.75	316.65	308.04	360.5	284.18	299.02	289.79	379.13	304.75	304.75
LRWT_f2p0_5144_transcript1341_g1	brown	8.87	10.22	9	39.8	31.29	31.34	14.75	29.08	55.85	10.71	7.66	12.35	35.23	41.42	41.42
LRWT_f23p0_1731_transcript35736_g1	brown	80.09	19.65	86.34	81.51	100.28	68.33	45.94	69.75	110.44	58.08	78.11	40.57	76.91	92.4	92.4
LRWT_f3p0_1691_transcript39332_g4	brown	46.63	68.39	57.43	54.16	83.5	79.95	82.65	76.85	78.31	44.2	49.71	51.34	43.95	39.89	39.89
LRWT_f2p0_980_transcript67198_g15	brown	97.37	88.22	112.06	129.24	114.04	107.9	97.96	117.56	130.46	95.41	96.08	93.53	123.52	119.14	119.14
LRWT_f3p0_1483_transcript44242_g1	brown	49.11	47.92	29.02	70.39	116.25	77.91	73.17	76.19	81.88	63.83	43.38	42.23	67.51	57.27	57.27
LRWT_f3p0_1499_transcript46180_g7	brown	98.17	66.51	59.42	81.98	87.29	103.9	96.04	65.65	87.06	74.5	61.5	62.52	72.56	86.7	86.7
LRWT_f2p0_1269_transcript54208_g4	brown	11.64	20.58	19.36	45.44	37.78	51.73	34.88	54.85	95.62	25.27	27.94	39.27	45.3	54	54
LRWT_f18p0_847_transcript71282_g1	brown	87.1	71.13	53.15	112.47	111.16	118.29	93.84	112.07	80.06	83.99	83.25	91.97	70	52.01	52.01
LRWT_f3p0_309_transcript101132_g1	brown	18.15	8.75	16.84	25.46	1.53	60.19	13.38	0	81.97	24.48	12.01	0	0	30.76	30.76
LRWT_f3p0_208_transcript107921_g13	brown	0	0	0	40.19	32.31	22.65	0	42.12	0	18.18	21.93	0	17.49	13.91	13.91
LRWT_f19p0_1110_transcript60624_g1	brown	31.99	9.07	20.99	29.22	31.31	45.88	47.84	74.44	65.43	48.62	42.51	10.41	48.3	49.46	49.46
LRWT_f2p0_2264_transcript24451_g1	brown	70.88	47.8	0	87.75	107.4	52.95	57.03	102.65	101	77.24	70.91	33.86	43.6	52.2	52.2
LRWT_f25p0_894_transcript69443_g1	brown	108.79	106.15	103.28	137.62	133.63	139	151.67	161.91	167.72	138.42	123.88	136.41	114.51	143.04	143.04
LRWT_f73p0_1728_transcript34190_g1	brown	149.55	156.94	146.94	241.46	229.45	250.55	215.76	236.88	252.66	223.73	205.4	213.43	217.79	203.54	203.54
LRWT_f11p0_860_transcript71165_g1	brown	27.83	18.59	22.59	87.93	54.52	54.01	52.02	44.34	45.66	18.54	24.36	10.23	51.3	40.37	40.37
LRWT_f8p0_842_transcript68916_g2	brown	46.6	49.61	46.86	58.79	108.46	115.43	40.56	16.9	76.31	43.68	33.07	47.33	29.98	33.05	33.05
LRWT_f2p0_1178_transcript57696_g1	brown	279.12	275.19	281.78	315.47	298.4	314.84	313.54	323.24	309.22	293.7	300.06	311.14	320.95	298.32	298.32
LRWT_f2p0_750_transcript77339_g2	brown	49.1	60.58	56.11	86.53	81.68	74.02	66.76	122.61	56.55	69.77	11.18	62.01	32.88	38.84	38.84
LRWT_f22p0_650_transcript81943_g1	brown	38.28	32.97	35.37	71.3	96.89	93.86	105.11	79.32	114.69	61.85	58.17	57.91	66.79	78.76	78.76
LRWT_f2p0_586_transcript86370_g20	brown	47.29	56.52	56.12	53.14	67.8	93.02	69.5	89.68	111.36	79.82	61.57	82.69	62.13	85.42	85.42
LRWT_f2p0_1190_transcript57935_g2	brown	22.88	18.45	21.12	38.03	37.98	36.37	39.93	40.84	44.98	21.25	30.08	24.23	53.1	51.33	51.33
LRWT_f4p0_831_transcript72982_g3	brown	13.64	14.61	32.33	40.57	119.88	69.92	56.66	37.62	30.35	14.76	13.39	35.41	45.59	30.48	30.48
LRWT_f9p0_1739_transcript37274_g1	brown	73.59	81.32	68.86	137.61	139.86	129.51	143.37	91.38	78.57	65.79	74.55	65.41	98.74	85.49	85.49
LRWT_f7p0_1403_transcript48330_g1	brown	45.13	45.95	47.82	80.14	96.51	96.06	97.2	92.87	104.62	83.01	59.98	72.49	78.81	82.82	82.82
LRWT_f2p0_2044_transcript29171_g5	brown	44.53	39.82	29.74	89.51	86.95	80.15	89.29	43.07	57.77	33.43	61.33	40.39	76.62	40.98	40.98
LRWT_f25p0_721_transcript76928_g1	brown	67.4	71.45	63.71	102.11	104.53	102.52	75.52	91.35	99.26	62.87	66.74	65.09	91.65	99.05	99.05
LRWT_f3p0_1181_transcript58455_g7	brown	13.3	16.14	4.91	47.07	14.55	19.62	1.4	123.18	233.6	31.35	1.29	0.67	76	11.96	11.96
LRWT_f6p0_1392_transcript48272_g1	brown	157.59	143.24	160.94	180.19	198.55	205.04	225.06	215.67	212.75	182.34	185.41	185.43	191.02	174.99	174.99
LRWT_f10p0_1253_transcript53566_g1	brown	31.49	22.74	24.12	66.92	74.32	101.45	55.15	89.48	44.05	58.98	33.89	28.97	27.07	20.84	20.84
LRWT_f2p0_1838_transcript34707_g17	brown	74.98	68.93	73.85	129.94	125.49	119.03	101.84	147.77	152.61	98.47	97.52	104.64	110.57	112.97	112.97
LRWT_f2p0_1349_transcript51258_g5	brown	14.17	4.16	0.21	0.07	35.45	30.51	101.08	35.78	0	1.21	14.26	14.96	16.36	9.59	9.59
LRWT_f2p0_1134_transcript60622_g11	brown	29.32	27.72	31.21	38.17	69.86	58.62	31.54	53.58	67.33	62.23	46.71	44.43	49.39	38.8	38.8
LRWT_f3p0_2198_transcript25951_g3	brown	79.71	74.08	78.73	126.1	147.84	141.77	100.13	102.62	125.5	75.12	87.4	76.57	95.46	89.79	89.79
LRWT_f5p0_2525_transcript20159_g1	brown	9.21	6.43	9.92	53.01	42.46	71.37	22.1	28.16	38.63	7.97	3.59	6.93	16.86	20.79	20.79
LRWT_f2p0_962_transcript67344_g7	brown	20.4	28.71	18.73	50.99	48.27	52.06	39.78	37.3	32.99	16.75	22.84	14.49	47.19	33.22	33.22
LRWT_f110p0_2107_transcript26153_g1	brown	159.31	135.64	162.61	176.37	182.94	187.52	187.84	203.63	166.87	148.7	171.55	142.25	212.79	170.18	170.18
LRWT_f8p0_4307_transcript2807_g1	brown	38.97	23.06	29.08	47.03	61.47	79.44	96.22	73.34	88.1	66.75	58.4	45.92	79.49	69.62	69.62
LRWT_f2p0_1111_transcript61082_g11	brown	130.56	148.97	160.17	215.53	179.21	227.08	179.31	172.9	138.26	165.86	169.96	190.67	143.47	175.59	175.59
LRWT_f14p0_1348_transcript50022_g1	brown	45.29	45.5	40.06	58.81	65.8	71.25	58.83	58.53	57.8	45.57	45.35	45.47	73.23	61.7	61.7
LRWT_f8p0_1604_transcript41772_g1	brown	133.07	84.77	50.9	126.93	110.13	229.16	140.5	138.25	162.13	144.68	102.17	76.99	123.91	145.72	145.72
LRWT_f5p0_1414_transcript48856_g2	brown	22.77	19.79	24.88	70.63	66.32	60.25	40.85	54.06	96.25	45.4	39.22	48.99	53.5	54.4	54.4
LRWT_f2p0_1669_transcript40105_g7	brown	48.43	77.29	79.7	70.72	95.87	95.84	105.15	97.32	103.39	67.42	87.47	87.87	104.11	74.83	74.83
LRWT_f3p0_1166_transcript59540_g6	brown	40.9	55.84	15.72	48.97	96.5	60.24	68.47	95.09	44.92	87.51	18.37	61.76	125.49	52.96	52.96
LRWT_f6p0_1466_transcript47233_g6	brown	5.66	5.47	5.45	27.45	32.16	50.38	40.89	32.21	31.28	13.73	11.5	12.85	26.72	26.33	26.33
LRWT_f2p0_2091_transcript28693_g10	brown	17.8	42.26	26.45	32.81	74.72	22.46	112.61	57.55	72.83	20.28	40.44	15.22	70.38	25.85	25.85
LRWT_f2p0_1250_transcript55611_g6	brown	54.98	0	25.35	61.55	42.53	47.06	51.53	28.09	77.7	39.06	25.86	30.04	51.65	34.01	34.01
LRWT_f8p0_477_transcript91007_g2	brown	29.16	45.37	51.64	60.7	55.18	37.76	50.27	43.18	49.11	29.55	24.71	17.21	28.62	25.4	25.4
LRWT_f15p0_764_transcript74078_g1	brown	41.53	37.06	22	57.72	107.13	53.87	27.61	37.95	52.07	32.58	19.11	9.88	55.99	49.07	49.07
LRWT_f5p0_819_transcript69959_g1	brown	5.1	9.82	11.93	158.6	125.15	170.83	18.99	38.46	42.65	6.7	3.03	6.69	15.35	26.99	26.99
LRWT_f2p0_2055_transcript28946_g8	brown	35.28	60.8	27.11	52.33	93.67	35.38	16.26	51.18	66.33	27.91	20.6	27.15	55.8	38.96	38.96
LRWT_f17p0_1546_transcript42560_g1	brown	24.05	19.93	20.77	68.58	61.12	149.81	116.21	85.07	33.8	24.58	27.92	29.72	24.96	45.96	45.96
LRWT_f14p0_782_transcript74431_g1	brown	19.2	24.61	18.94	41.32	61.49	52.47	11.1	18.6	32.8	20.6	11.47	29.5	12.45	39.87	39.87
LRWT_f36p0_917_transcript68195_g1	brown	53.72	41.05	33.17	71.24	138.45	80.41	81.54	61.97	151.02	68.25	54.7	66.36	56.11	72.71	72.71
LRWT_f6p0_649_transcript80370_g2	brown	97	97.5	94.38	137.59	123.36	125.9	118.62	129.91	97.3	95.06	101.86	109.04	114.01	118.55	118.55
LRWT_f5p0_4613_transcript2235_g1	brown	15.18	11.85	10.31	36.58	70.23	51.09	33.38	55.97	23.8	52.64	15.85	23.98	56.84	17.97	17.97
LRWT_f17p0_1339_transcript50864_g2	brown	141.78	136.5	158.56	217.05	181.14	196.94	155.19	188.14	163.38	180.27	163.64	173.14	175.31	167.32	167.32
LRWT_f18p0_1535_transcript41408_g1	brown	66.03	65.05	62.68	101.7	104.57	102.52	92.24	79.62	96.86	96.63	84.53	90.86	80.35	75.61	75.61
LRWT_f2p0_1242_transcript55975_g13	brown	0.34	0.8	1.67	74.33	47.36	41.4	35.17	21.8	33.73	4.28	4.87	3.77	47.84	12.84	12.84
LRWT_f13p0_1682_transcript39179_g1	brown	73.71	70.7	71.44	85.55	105.75	111.85	115.38	112.15	110.51	94.24	90.19	98.02	93.19	93.72	93.72
LRWT_f2p0_1291_transcript50823_g1	brown	21.14	33.72	39.15	38.51	54	51.53	46.22	43.52	32.23	39.34	31.21	20.66	18.35	21.73	21.73
LRWT_f3p0_1679_transcript39729_g3	brown	45.57	56.74	42.7	44.75	51.11	85.25	82.25	73.71	61.14	56.71	62.36	73.12	45.79	62.52	62.52
LRWT_f2p0_1943_transcript31615_g6	brown	126.12	136.56	127.98	177.12	189.81	187.39	164.51	252.09	194.2	189.08	164.89	189.79	201.17	191.64	191.64
LRWT_f22p0_1290_transcript51668_g1	brown	132.54	131.11	132.58	180.7	171.8	164.14	144.57	157	143.41	141.07	154.71	141.53	166.63	154.72	154.72
LRWT_f2p0_2934_transcript14228_g1	brown	51.09	39.01	41.55	79	170.78	175.2	126.99	118.53	138.7	39.2	45.72	40.42	56.19	40.65	40.65
LRWT_f4p0_1132_transcript59994_g5	brown	45.79	44.17	53.62	84.73	92.54	84.84	70.69	70.5	63.68	55.23	70.95	68.13	80	64.27	64.27
LRWT_f7p0_1911_transcript32046_g4	brown	126.68	143.02	126.49	173.44	164.48	157.94	139.93	163.79	143.32	133.5	145.31	142.09	159.23	150.72	150.72
LRWT_f16p0_661_transcript81613_g1	brown	95.6	53.2	91.75	86.74	88.89	74.56	75.95	112.16	95.88	51.94	38.04	84.12	123.02	64.15	64.15
LRWT_f2p0_1444_transcript48111_g12	brown	8.37	14.47	9.85	41.56	28.78	41.61	33.53	42.75	42.58	24.18	40.82	42.99	22.65	29.81	29.81
LRWT_f10p0_681_transcript78983_g1	brown	29.91	31.28	40.07	70.28	69.33	67.33	76.65	65.36	61.81	24.48	30.54	25.94	75.99	77.1	77.1
LRWT_f2p0_2398_transcript22385_g8	brown	31.57	11.46	2.09	59.13	23.51	23.19	16.19	26.39	37.81	3.29	26.02	4.98	25.01	2.54	2.54
LRWT_f2p0_1537_transcript44877_g11	brown	14.65	28.71	31.42	91.57	175.17	36.72	57.04	59.26	125.28	42.79	45.01	54.19	42.46	56.33	56.33
LRWT_f11p0_1250_transcript55530_g1	brown	70.43	49.91	72.26	101.22	89.07	111.69	73.48	87.57	91.78	61.78	67.08	86.46	84.42	67.6	67.6
LRWT_f2p0_1057_transcript63321_g7	brown	16.76	19.3	13.02	36.71	30.89	30.91	38.55	44.75	42.59	16.85	25.55	19.66	45.99	47.34	47.34
LRWT_f2p0_1636_transcript41245_g7	brown	28.9	20.83	24.87	48.3	58.39	79.89	87.67	62.72	66.3	37.6	51.04	48.19	43.61	54.48	54.48
LRWT_f17p0_875_transcript68862_g1	brown	41.99	40.78	43.26	68.4	59.29	69.28	62.73	73.61	66.86	54.42	47.35	51.07	76.65	88.17	88.17
LRWT_f21p0_1184_transcript56545_g1	brown	82.12	75.91	82.29	99.85	112.36	114.29	113.94	105.41	101.69	81.45	81.46	87.28	101.47	88.21	88.21
LRWT_f3p0_1785_transcript36132_g2	brown	4.41	3.6	3.72	35.37	97.28	49.16	38.78	31.87	40.3	30.87	27.15	24.2	12.11	17.2	17.2
LRWT_f6p0_1578_transcript43022_g1	brown	187.19	195.69	190.72	214.73	221.53	235.26	207.22	202.25	225.44	189.78	198.68	192.89	209.77	207.4	207.4
LRWT_f7p0_669_transcript81531_g4	brown	36.83	49.3	56.88	85.26	71.89	79.93	70.94	92.11	56.81	65.32	57.09	93.85	65.8	68.49	68.49
LRWT_f14p0_1349_transcript48854_g1	brown	72.6	80.18	86.46	88.54	88.14	99.45	110.02	121.88	108.88	122.08	96.01	113.26	107.41	114.77	114.77
LRWT_f3p0_771_transcript75681_g1	brown	20.13	17.56	25.62	54.01	49.3	54.96	20.68	52.74	32.78	34.11	28.1	45.5	32.76	36.96	36.96
LRWT_f2p0_635_transcript83595_g15	brown	5.89	6.25	9.39	134.31	59.66	71.03	1.11	20.94	24.06	7.79	3.25	10.28	18.08	29.45	29.45
LRWT_f3p0_1784_transcript35176_g1	brown	56.29	44.69	43.45	53.25	72.8	78.28	96.37	83.24	79.41	51.3	64.58	64.47	76.73	66.94	66.94
LRWT_f6p0_819_transcript72912_g2	brown	7.08	7.55	4.15	62.38	40.93	24	20.93	12.68	29.06	6.4	9.6	6.79	32.13	30.95	30.95
LRWT_f2p0_298_transcript102408_g14	brown	8.19	20.56	44.42	56.69	52.23	36.79	48.12	35.53	17.13	34.07	31.18	24.75	49.01	40.48	40.48
LRWT_f2p0_1429_transcript48653_g9	brown	54.63	55.68	59.76	52.91	52.29	73.36	90.68	85.33	91.8	57.84	56.14	66.96	88.94	73.96	73.96
LRWT_f11p0_2222_transcript23966_g1	brown	52.27	52.28	50.33	70	89.28	101.88	74.7	91.66	58.76	61.88	65.11	57.62	43.16	37.55	37.55
LRWT_f2p0_2270_transcript24600_g5	brown	23.74	20.31	27.07	49.27	52.83	66.62	63.9	42.87	46.39	27.93	27.28	26.83	53.14	31.52	31.52
LRWT_f17p0_1308_transcript52683_g1	brown	62.27	74.38	60.19	107.9	78.52	103.59	99.17	86.97	97.42	82.58	85.53	64.86	78.02	93.83	93.83
LRWT_f2p0_479_transcript92393_g20	brown	6.59	13	12.5	36.78	26.05	43.56	37.17	44.92	49.76	50.15	31.65	33.66	44.97	49.84	49.84
LRWT_f2p0_1732_transcript36303_g1	brown	75.42	81.72	83.68	97.75	110.9	112.95	98.86	99.45	97.01	76.81	99.01	87.92	83.26	74.83	74.83
LRWT_f32p0_1044_transcript59280_g1	brown	112.98	113.9	103.71	135.53	148.76	152.34	147.94	148.99	157.41	141.32	120.26	135.13	132.3	157.46	157.46
LRWT_f3p0_930_transcript69673_g8	brown	78.98	67.45	34.72	93.33	85.87	89.58	78.61	86.99	96.29	66.09	56.39	86.26	58.82	67.64	67.64
LRWT_f2p0_1005_transcript65685_g18	brown	47.88	39.36	36.77	36.59	94.86	64.69	105.39	46.6	78.93	32.3	55.88	47.54	50.84	24.81	24.81
LRWT_f2p0_696_transcript81451_g26	brown	15.94	3.07	4.34	202.27	90.55	74.97	11.28	96.18	3.61	15.67	7.96	4.73	5.83	21.93	21.93
LRWT_f2p0_1776_transcript36319_g5	brown	91.3	122.94	78.85	122.91	101.67	111.42	102.87	148.97	172.71	81.64	91.96	93.93	94.93	106.22	106.22
LRWT_f2p0_702_transcript80797_g18	brown	0.54	2.27	0.78	108.69	52.9	45.95	49.38	29.24	7.5	13.18	12.39	5.51	3.56	13.66	13.66
LRWT_f3p0_1910_transcript32534_g1	brown	32.71	25.31	31.62	67.34	78.18	88.97	78.23	71.64	62.48	30.73	36.11	29.27	69.34	69.7	69.7
LRWT_f5p0_1017_transcript64654_g1	brown	18.14	16.83	7.82	61.21	67.24	36.91	6.11	26.07	88.63	18.87	16.05	21.99	34.57	55.88	55.88
LRWT_f2p0_1330_transcript52359_g3	brown	19.82	12.39	25.82	38.7	23.22	30.62	41.56	33.32	14.1	12.22	17.67	35.71	35.54	8.84	8.84
LRWT_f2p0_2611_transcript18839_g4	brown	31.69	13.23	42.42	66.02	38.49	60.76	8.96	44.54	53.2	44.28	16.81	19.08	28.66	47.81	47.81
LRWT_f9p0_819_transcript69815_g1	brown	29.77	40.33	34.88	69.7	50.96	51.6	37.67	58.25	51.95	23.82	30.06	26.25	60.47	52.06	52.06
LRWT_f11p0_1599_transcript41172_g1	brown	51.68	44.92	47.19	77.75	80.14	76.2	76.49	78.72	72.28	52.51	59.59	57	68.47	65.88	65.88
LRWT_f14p0_1979_transcript29640_g1	brown	117.13	108.87	86.41	130.66	129.13	171.77	143.67	115.65	104.46	105.07	87.27	112.34	105.2	124.78	124.78
LRWT_f3p0_1595_transcript42673_g5	brown	84.8	65.23	68.24	87.08	137.3	109.64	150.82	94.42	86.82	104.7	113.8	104.43	101.7	103.22	103.22
LRWT_f7p0_1984_transcript30138_g1	brown	63.91	64.58	55.46	76.88	98.68	71.01	67.08	74.46	38.95	67.46	55.41	35.19	38.49	39.91	39.91
LRWT_f2p0_272_transcript103577_g13	brown	10.42	12.36	5.02	32.92	49.85	41.07	40	50.02	9.43	2.79	9.2	6.52	27.57	0	0
LRWT_f4p0_2063_transcript28433_g2	brown	15.01	9.36	10.73	37.02	43.64	33.84	26.86	39.26	49.92	20.24	16.46	16.14	25.25	27.04	27.04
LRWT_f3p0_1634_transcript41735_g9	brown	72.64	79.36	62.28	73.53	105.5	91.71	57.66	77.89	82.1	70.98	67.34	67.5	81.74	94.39	94.39
LRWT_f3p0_1330_transcript52688_g5	brown	29.26	27.91	33.07	60.5	55.78	52.58	54.36	62.96	57.62	47.02	40.55	40.53	44.67	65.39	65.39
LRWT_f3p0_3351_transcript9470_g2	brown	25.76	18.73	21.95	36.09	50.62	63.77	67.56	62.21	64.85	40.02	33.37	39.23	33.11	32.16	32.16
LRWT_f3p0_1437_transcript48323_g4	brown	58.01	65.13	63.29	55.03	84.58	106.39	42.17	89.56	99.69	74.98	85.18	74.89	79.59	72.26	72.26
LRWT_f12p0_781_transcript74813_g1	brown	36.68	24.02	28.03	51.97	74.18	44.83	22.83	29.77	54.34	34.96	36.87	34.28	27.2	22.24	22.24
LRWT_f3p0_1291_transcript54004_g6	brown	41.4	31.91	39.71	39.72	48.92	54.44	54.84	39.1	38.27	24.44	28.45	28.14	38.71	26.71	26.71
LRWT_f2p0_1597_transcript42451_g5	brown	5.78	4.84	8.78	35.21	57.32	49.87	86.93	74.63	37.69	63.85	45.36	53.1	47.62	39.24	39.24
LRWT_f2p0_588_transcript86034_g10	brown	30.99	43.59	68.24	80.66	75.86	68.82	58.71	54.45	35	46.83	51.16	106.78	51.09	61.11	61.11
LRWT_f22p0_1625_transcript41161_g1	brown	89.68	86.05	89.56	121.48	126.27	129.7	133.32	121.77	142.28	104.27	119.59	114.39	134.92	115.21	115.21
LRWT_f2p0_2120_transcript27448_g6	brown	14.86	14.26	11.91	47.24	41.54	32.18	18.83	41.76	44.45	21.93	16.84	20.44	29.76	26.94	26.94
LRWT_f3p0_1406_transcript49504_g2	brown	134.81	137.22	143.85	200.94	187.71	173.23	160.46	201.85	170.94	157.59	163.17	196	163.16	159.39	159.39
LRWT_f12p0_2241_transcript24471_g2	brown	13.17	11.02	10.22	35.1	32.56	40.48	44.63	36.03	25.64	23.88	34.01	30.46	43.32	16.19	16.19
LRWT_f7p0_564_transcript87169_g2	brown	48.23	25.78	17.92	49.77	29.14	55.47	46.16	36.29	55.14	23.63	33.6	10.52	34.52	31.92	31.92
LRWT_f6p0_1159_transcript56633_g1	brown	42.56	48.12	48.44	96.78	67.56	69.56	58.3	68.52	62.59	53.59	55.51	64.08	83.59	74.05	74.05
LRWT_f14p0_1557_transcript42991_g1	brown	50.68	54.06	50.19	83.96	95.68	90.65	71.13	77.81	67.22	67	75.12	77.18	65.69	61.81	61.81
LRWT_f13p0_1494_transcript45428_g1	brown	23.06	10.83	25.85	20.63	80.26	31.79	19.23	62.9	43.98	27.38	46.23	37.34	35.07	17.22	17.22
LRWT_f4p0_1896_transcript32780_g4	brown	14.34	9.07	15.49	78.22	65.01	53.91	53.79	58.28	66.52	48.68	47.35	58.99	65.26	43.83	43.83
LRWT_f21p0_1027_transcript64183_g1	brown	31.28	52.96	42.76	78.5	62.9	76.4	48.97	66.61	55.75	38.9	40.76	45.79	61.56	57.68	57.68
LRWT_f6p0_475_transcript91420_g1	brown	3.45	2.76	18.94	35.79	56.63	7.58	26.39	31.9	7.76	0	23.23	16.51	8.09	17.71	17.71
LRWT_f4p0_980_transcript65952_g5	brown	16.11	4.42	10.03	15.09	46.29	30.91	15.34	32.47	22.95	23.78	38.55	47.5	36.85	25.29	25.29
LRWT_f5p0_2847_transcript15011_g2	brown	37.76	29.81	12.51	37.69	118.1	66.2	16.61	52.78	70.13	19.87	27.8	27.24	45.61	23.21	23.21
LRWT_f4p0_2895_transcript14281_g1	brown	35.12	32.77	33.05	45.8	52.58	58.18	51.27	55.42	60.08	35.62	33.12	31.34	50.52	45.52	45.52
LRWT_f2p0_1519_transcript45581_g12	brown	105.86	105.63	107.62	110.44	115.06	136.76	91.73	140.93	123.39	133.27	121.13	126.9	127.69	126.29	126.29
LRWT_f2p0_1480_transcript46766_g9	brown	52.4	59.04	62.27	107.09	122.39	118.11	83.27	85.4	82.55	50.25	57.23	52.61	70.29	59.52	59.52
LRWT_f10p0_2978_transcript12701_g1	brown	8.03	9.28	4.97	10.38	16.64	20.24	25.24	12.75	52.09	20.96	14.55	31.45	26.83	30.21	30.21
LRWT_f3p0_1219_transcript57099_g9	brown	0.37	0.12	0.44	20.33	10.48	33.05	88.19	29.29	21.25	12.17	29.79	10.41	4.46	21.36	21.36
LRWT_f3p0_936_transcript68754_g8	brown	4.4	5.65	6.35	19.61	23.04	25.81	13.41	20.97	17.51	4.32	4.08	4.95	19.87	27.36	27.36
LRWT_f3p0_1997_transcript30233_g4	brown	33.67	21.79	27.01	61.33	50.12	36.12	21.65	40.2	68.39	23.8	27.72	22.84	45.92	45.93	45.93
LRWT_f3p0_764_transcript76726_g5	brown	19.61	33.95	47.85	132.6	24.87	134.24	39.62	43.92	46.64	25.72	49.05	21.52	56.42	53.17	53.17
LRWT_f2p0_715_transcript79362_g24	brown	9.65	9.56	8.34	31.25	42.58	27.98	9.29	23	45.26	30.49	12.84	24.6	19.43	18.3	18.3
LRWT_f2p0_773_transcript76379_g14	brown	5.21	9.6	11.11	23	24.41	34.44	44.21	42.46	55.74	13.72	25.6	34.16	43.78	35.68	35.68
LRWT_f19p0_719_transcript75887_g1	brown	61.1	72.64	68.5	118.47	100.69	122.3	82.72	113.58	83.52	83.86	79.59	85.63	95.34	90.12	90.12
LRWT_f11p0_913_transcript66773_g1	brown	129.4	142.51	138.01	164.94	155.38	168.14	147.05	150.9	147.69	118.36	115.86	128.54	162.24	153.25	153.25
LRWT_f2p0_1393_transcript49993_g7	brown	26.97	26.25	27.18	51.84	49.3	61.01	58.29	64.51	51.56	37.58	40.76	41.96	55.89	61.24	61.24
LRWT_f11p0_559_transcript81555_g1	brown	52.89	51.73	66.59	102.51	95.47	78.7	39.22	69.43	117.07	59.78	40.02	63.2	78.2	74.46	74.46
LRWT_f4p0_2785_transcript16070_g1	brown	27.27	27.44	26.08	44.28	52.86	50.49	34.72	57.76	36.92	25	26.07	29.6	46.8	38.02	38.02
LRWT_f7p0_1126_transcript59876_g2	brown	123.81	125.74	146.08	182.6	168.57	163.85	134.9	161.49	165.83	141.03	150	156.19	147.55	159.25	159.25
LRWT_f3p0_773_transcript75620_g1	brown	44.9	27.34	17.64	23.5	57.62	22.83	116.11	29.53	36.84	15.68	4.48	0	12.5	27.28	27.28
LRWT_f7p0_842_transcript70198_g2	brown	71.39	70.6	56.93	118.13	77.41	71.18	94.22	88.94	94.13	63.18	96.12	68.31	67.8	79.53	79.53
LRWT_f11p0_1548_transcript44154_g1	brown	12.62	20.38	12.2	31.4	57.77	18.28	12.39	32.43	46.98	17	40.64	21.28	44.98	22.22	22.22
LRWT_f9p0_787_transcript74266_g2	brown	127.63	123.21	130.11	219.84	168.59	194.72	152.14	141.88	138.83	139.98	147.36	145.64	135.58	130.39	130.39
LRWT_f2p0_1268_transcript54915_g11	brown	14.43	15.99	18.33	35.38	31.93	23.86	25.91	29.82	28.72	11.18	7.7	10.92	30.67	37.99	37.99
LRWT_f9p0_1076_transcript62146_g1	brown	29.2	22.75	22.39	77.15	78.23	79.73	59.08	44.88	57.5	32.22	27.76	35.09	25.24	28.29	28.29
LRWT_f8p0_1146_transcript59032_g3	brown	39.52	39.31	38.77	45.08	51.87	50.08	48.99	55.04	56.12	38.29	39.29	35.69	54.9	58.84	58.84
LRWT_f5p0_528_transcript89154_g4	brown	12.93	18.08	0	27.51	34.93	19.02	1.39	8.23	15.08	15.56	14.4	1.64	3.49	0.91	0.91
LRWT_f4p0_1902_transcript32377_g1	brown	105.53	88.71	101.2	95.91	110.41	105.22	124.25	103.39	113.07	101.32	87.46	80.86	110.69	84.24	84.24
LRWT_f4p0_891_transcript69865_g1	brown	14.52	8.59	17.91	10.5	33.71	62.53	24.92	28.85	74.5	7.72	7.11	12.27	5.96	21.94	21.94
LRWT_f7p0_1003_transcript64828_g1	brown	2.72	3.63	7.44	24.42	37.77	59.27	38.12	22.26	28.46	12.23	37.44	14.69	31.66	37.62	37.62
LRWT_f11p0_1146_transcript59026_g1	brown	1.39	0.38	0.99	25.48	24.15	31.75	16.33	16.2	54.85	5.44	6.19	9.34	7.97	18.72	18.72
LRWT_f2p0_886_transcript70731_g6	brown	0	0	19.45	0	33.57	28.72	35.8	51.46	0.2	8.41	11.65	30.02	34.14	34.82	34.82
LRWT_f2p0_1090_transcript61963_g9	brown	11.93	13.96	18.7	81.54	59.1	41.08	52.53	58.42	44.17	12.65	16.05	9.43	50.62	18.57	18.57
LRWT_f3p0_468_transcript92500_g8	brown	1.71	2.09	1.69	30.45	38.59	7.09	33.44	21.07	14.43	21.15	15.18	18.24	26.16	16.34	16.34
LRWT_f29p0_556_transcript87087_g1	brown	55.14	44.81	68.93	95.73	89.05	90.75	91.68	85.88	60.89	73.19	76.64	71.32	89.18	90.88	90.88
LRWT_f13p0_966_transcript65842_g1	brown	8.95	18.67	29.93	53.03	23.7	48.71	27.77	79.22	13.93	13.84	5.93	8.21	51.21	20.7	20.7
LRWT_f7p0_2559_transcript18040_g1	brown	59.39	63.71	52.16	57.89	72.67	71.51	38.55	61.81	70.67	44.45	37.45	46.36	61.48	62.59	62.59
LRWT_f4p0_529_transcript88997_g7	brown	22.34	24.78	23.52	34.63	34.31	37.12	36.99	38.17	20.58	27.91	19.59	20.49	39.85	43.5	43.5
LRWT_f81p0_2354_transcript21663_g1	brown	68.86	59.68	63.25	77.68	107.7	98.7	92.7	69.2	84.04	61.26	73.46	56.11	62.92	51.07	51.07
LRWT_f17p0_1161_transcript57337_g1	brown	34.6	36.26	35.72	52.54	58.91	63.35	96.03	48.42	57.63	40.8	44.17	38.1	61.28	52.12	52.12
LRWT_f2p0_986_transcript66786_g14	brown	22.38	25.42	23.72	43.94	35.13	40	35.81	44.95	40.69	26.74	25.6	27.51	48.76	45.59	45.59
LRWT_f4p0_969_transcript66544_g1	brown	17.06	8.12	10.54	39.42	38.32	27.19	17.13	47.55	54.01	18.74	16.78	20.16	33.67	26.17	26.17
LRWT_f8p0_2016_transcript29081_g1	brown	120.81	98.13	90.77	136.69	147.03	144.69	135.99	117.05	164.46	140.4	138.42	123.32	132.41	127	127
LRWT_f5p0_743_transcript76993_g3	brown	42.42	16.37	28.91	50.28	35.86	26.21	39.12	36.74	44.59	26.77	21.68	42.1	55.04	14.36	14.36
LRWT_f3p0_2857_transcript15350_g2	brown	12.15	7.55	10.74	43.93	47.39	31.97	32.44	36.6	48.17	22.06	18.98	31.13	34.36	25.7	25.7
LRWT_f4p0_1724_transcript38726_g4	brown	22.67	55.1	37.94	79.52	100.06	105.93	70.58	77.73	110.38	57.24	66.64	67.28	73.59	70.46	70.46
LRWT_f2p0_3267_transcript10088_g2	brown	50.74	43.01	53.14	85.32	128.4	103.55	102.62	75.14	76.53	47.37	51.13	56.42	63.19	50.16	50.16
LRWT_f7p0_550_transcript87840_g3	brown	27.2	20.5	21.02	46.51	42.29	45.71	31.34	37.25	41.24	42.26	20.05	33.95	50.27	53.75	53.75
LRWT_f2p0_2315_transcript23713_g3	brown	74.76	64.56	72.72	120.86	157.35	164.31	125.75	95.91	92.85	72.08	79.51	66.97	75.99	69.07	69.07
LRWT_f4p0_1719_transcript38345_g5	brown	36.24	52.65	59.3	62.62	50.26	60.38	77.41	65.41	48.87	42.52	41.26	50.21	68.84	44.35	44.35
LRWT_f10p0_883_transcript69700_g2	brown	31.66	15.02	35.03	40.2	61.83	55.7	7.98	27.38	44.22	29.52	24.02	19.63	43.02	44	44
LRWT_f5p0_1346_transcript51734_g3	brown	24.78	21.26	35.28	62.21	44.13	44.22	32.99	28.17	41.94	22.55	18.88	28.81	17.21	33.2	33.2
LRWT_f3p0_1406_transcript49563_g3	brown	11.56	10.02	11.76	35.59	31.55	30.64	30.63	30.11	28.26	29.78	17.77	19.33	17.86	14.98	14.98
LRWT_f5p0_1189_transcript56873_g1	brown	8.93	4.85	4.55	20.78	21.14	21.76	17.85	20.12	12.53	8.86	8.37	8.71	19.25	36.66	36.66
LRWT_f2p0_1172_transcript58990_g15	brown	42.8	39.25	41.59	62.34	68.7	66.99	56.27	53.68	45.6	51.49	59.08	50.16	39.32	34.33	34.33
LRWT_f2p0_1209_transcript57397_g6	brown	12.87	0.3	31.76	11.48	26.3	25.07	22.15	39.71	26.86	6.85	11.83	16.11	25.17	33.98	33.98
LRWT_f3p0_2578_transcript18609_g1	brown	74.06	77.72	52.92	96.71	120.65	130.18	91.4	84.52	128.13	76.43	64.37	54.25	89.69	82.52	82.52
LRWT_f4p0_1037_transcript64137_g4	brown	96.1	98.2	97.63	126.79	113.85	107.08	112.86	109.49	122.05	97.25	103.84	116.73	120.22	104.45	104.45
LRWT_f3p0_1422_transcript49742_g11	brown	52.56	44.26	40.13	69.67	65.75	59.04	61.4	70.21	79.03	43.79	44.53	47.58	81.32	70.07	70.07
LRWT_f2p0_1697_transcript39014_g2	brown	14.88	10.13	15.85	27.15	20.84	41.15	34.01	30.58	20.74	11.56	12.02	7.92	34.75	28.34	28.34
LRWT_f13p0_1222_transcript55664_g1	brown	16.44	15.57	11.43	88.13	69.11	44.07	17.56	28.26	34.25	14.01	16.36	17.57	42.7	24.35	24.35
LRWT_f4p0_2220_transcript24861_g1	brown	11.13	11.67	10.52	20.14	23.33	22.47	32.18	35.83	35.89	13.72	11.23	14.54	22.96	24.08	24.08
LRWT_f4p0_1043_transcript63052_g3	brown	56.72	52.51	42.49	65.44	51.16	65.69	59.6	63.38	73.19	54.65	49.28	64.06	66.65	79.82	79.82
LRWT_f3p0_1208_transcript57307_g2	brown	26.07	28.91	23.39	43.57	53.83	59.17	47.46	34.24	42.96	21.95	36.37	24.84	51.33	43.49	43.49
LRWT_f2p0_3687_transcript6412_g3	brown	19.54	7.18	30.38	25.61	66.21	51.4	58.93	20.03	39.08	22.52	29.96	38.4	13.74	33.1	33.1
LRWT_f2p0_847_transcript72558_g2	brown	40.64	41.3	35.59	66.17	57.67	52.63	54.13	63.59	54.89	43.37	45.44	42.57	56.7	59.33	59.33
LRWT_f2p0_511_transcript90082_g10	brown	8.99	6.84	5.44	23.02	25.64	19.5	7.52	15.53	24.75	7.2	5.19	8.1	31.4	27.62	27.62
LRWT_f3p0_864_transcript71749_g2	brown	18.13	46.6	42.32	113.72	76.89	74.47	34.24	48.55	32.01	29.19	25.89	28.27	39.44	39.86	39.86
LRWT_f2p0_1779_transcript35669_g1	brown	15.69	24.07	16.96	50.89	27.27	41.23	58.57	40.5	39.02	58.85	30.34	38.46	37.81	43.24	43.24
LRWT_f2p0_1933_transcript31907_g6	brown	80.43	76.61	73.41	114.4	110.29	133.79	76.93	84.91	97.31	92.94	81.38	83.27	90.03	90.35	90.35
LRWT_f3p0_1646_transcript44094_g11	brown	13.85	23.83	17.67	18.09	29.5	42.22	26.7	29.22	29.88	21.51	17.61	15.32	32.17	38.98	38.98
LRWT_f3p0_3038_transcript13202_g4	brown	34.86	19.04	31.1	20.21	41.33	65.94	44.05	53.47	55.44	18.86	34.34	21.66	39.7	46.24	46.24
LRWT_f2p0_2252_transcript26537_g6	brown	15.75	6.83	6.55	45.93	16.84	13.61	25.93	16.86	34.28	34.24	11.16	10.71	12.49	25.43	25.43
LRWT_f4p0_1785_transcript35530_g2	brown	41.11	34.96	35.91	63.86	61.77	61.77	53.19	68.31	56.86	48.62	56.52	50.6	56.96	43.97	43.97
LRWT_f2p0_655_transcript82386_g19	brown	16.63	20.11	23.05	67.8	53	59.52	35.09	26.76	44.1	21.01	34.03	21.91	61.06	29.59	29.59
LRWT_f4p0_794_transcript74936_g4	grey	4798.13	12135.6	6133.94	9918.94	6654.63	9976.73	4643.53	9034.04	3837.28	10230.1	8767.74	10197.3	7459.16	6693.09	6693.09
LRWT_f136p0_743_transcript76310_g1	grey	3321.86	1532.53	2108.99	1392.76	1797.91	2661.55	7956.47	4081.96	5211.78	3744.19	4321.15	4187.74	5479.18	5536.54	5536.54
LRWT_f3p0_762_transcript76792_g3	grey	289.01	284.61	777.24	606.46	1371.65	1370.08	3599.71	1639.18	2491.52	2500.52	3363.69	2875.54	3976.96	3896.71	3896.71
LRWT_f43p0_1285_transcript52944_g1	grey	3595.27	1452.62	942.48	367.12	2583.34	1282.94	206.89	1781.43	1530.5	950.6	3211.87	4207.88	2454.15	1831.14	1831.14
LRWT_f2p0_749_transcript77449_g14	grey	3019.16	4862.6	3354.15	2404.8	1261.32	1795.15	1853.05	2398.13	1137.14	1322.01	1130.64	1483.46	2304.32	2337.25	2337.25
LRWT_f3p0_897_transcript70498_g4	grey	1171.07	29.85	3427.22	2088.17	921.88	1028.9	1750.74	1583.55	1691.68	6190.56	1510.43	2094.39	27.54	2944.88	2944.88
LRWT_f11p0_766_transcript76416_g1	grey	1401.7	2621.22	2305.16	2570.77	1250.99	2087.96	949.86	1697.46	414	6375.01	2840.46	3416.07	1682.6	2478.33	2478.33
LRWT_f5p0_579_transcript86406_g2	grey	1967.67	2099.31	1595.73	317.55	257.09	1339.02	1165.75	1935.91	370.4	1266.96	1506.16	564.87	377.17	1355.13	1355.13
LRWT_f7p0_654_transcript81357_g1	grey	2558.42	1697.79	1779	2487.77	2321.27	811.46	1872.52	1545.61	2677.22	28.12	2397.74	1028.71	231.55	2081	2081
LRWT_f5p0_1162_transcript59054_g2	grey	3459.46	2970.7	3202.49	2781.25	2772.13	2632.02	3493.41	3046.23	2335.78	1986.47	3013.56	2207.18	2383.38	2243.07	2243.07
LRWT_f77p0_537_transcript86394_g1	grey	1770.9	1428.89	1870.65	599.19	713.34	854.02	1574.74	1179.82	1290.43	561.98	1021.43	827.79	1242.81	1725.14	1725.14
LRWT_f4p0_764_transcript75922_g1	grey	7.94	1.62	7.8	57.2	253.25	354.46	1169.03	483.83	120.75	195.21	653.28	1312.53	730.55	541.6	541.6
LRWT_f75p0_670_transcript80533_g1	grey	373.1	729.89	1031.51	1016.86	843.14	1082.43	437.78	734.06	309.73	1116.56	1145.35	1690.29	697.97	700.57	700.57
LRWT_f6p0_592_transcript84529_g1	grey	1883.89	1687.81	1085.06	1556.09	924.4	1264.91	1315.31	649.85	848.98	554.92	1019.37	630.31	2043.98	887.83	887.83
LRWT_f8p0_899_transcript69383_g2	grey	3032.96	3247.54	2713.04	3409.29	3436.37	3521.93	2894.58	2518.83	2568.72	3834.15	2977.5	3715.39	2933.22	3184.15	3184.15
LRWT_f53p0_904_transcript65367_g1	grey	837.93	328.58	778.23	996.56	974.33	554.72	198.31	268.2	403.8	899.56	314.74	361.97	741.08	649.14	649.14
LRWT_f2p0_931_transcript68672_g3	grey	12.25	84.3	313.82	22.16	5.25	323.04	46.12	0.86	783.99	344.63	391.11	187.87	294.46	791.14	791.14
LRWT_f4p0_621_transcript83717_g3	grey	476.52	587.11	375.9	1236.8	845.12	695.26	1610.39	829.33	783.56	1134.16	521.99	1479.13	633.86	860.62	860.62
LRWT_f7p0_763_transcript76562_g3	grey	1389.01	824.63	1310.28	979.52	1029.09	1649.19	1248.58	1463.98	855.38	1151.96	1062.07	1128.81	783.05	744.72	744.72
LRWT_f5p0_1569_transcript43179_g2	grey	787.52	1039.51	605.84	728.43	838.9	1094.9	1336.82	1254.93	1360.48	1120.81	1022.98	1171.79	1190.24	1432.78	1432.78
LRWT_f3p0_711_transcript79373_g4	grey	973.09	547.71	402.08	494.03	337.02	820.08	684.86	244.42	762.33	982.12	1006.11	991.14	609.75	941.18	941.18
LRWT_f6p0_527_transcript89036_g4	grey	632	948.08	661.71	347.9	619.73	1292.1	2747.74	1558.64	895.95	867.65	1086.53	998.66	1168.42	958.83	958.83
LRWT_f11p0_1568_transcript41577_g1	grey	525.31	1256.89	442.89	926.8	403.84	852.31	253.31	1242.33	877.63	671.2	1120.82	648.63	447.1	534.78	534.78
LRWT_f2p0_814_transcript74242_g16	grey	636.88	782.8	866.07	1080.03	1134.51	789.3	563.07	568.85	659.97	1289.16	1215.72	1053.68	1011.83	1179.65	1179.65
LRWT_f35p0_1361_transcript49623_g1	grey	859.39	658.96	1007.54	772.9	482.86	1122.41	1024.81	437.4	784.35	779.1	874.71	851.26	474.28	576.39	576.39
LRWT_f6p0_1001_transcript65263_g1	grey	77.17	564.55	245.7	545.91	280.02	378.34	408.15	328.79	16.29	609.42	114.57	893.51	186.29	646.21	646.21
LRWT_f3p0_1010_transcript65355_g6	grey	770.39	1062.98	528.84	781.41	943.99	809.98	403.27	565.85	713.2	418.14	783.09	561.3	340.88	754.24	754.24
LRWT_f6p0_1521_transcript42506_g1	grey	383.5	253.44	220.44	555.77	110.86	534.99	265.41	217.27	1711.96	560.03	227.18	434.84	175.82	559.97	559.97
LRWT_f4p0_3151_transcript11441_g1	grey	446.65	439.12	448.23	423.99	204.11	737.54	784.77	223.94	670.35	288.15	79.29	744.25	307.4	259.77	259.77
LRWT_f5p0_569_transcript86708_g4	grey	639.5	757.18	963.95	499.2	526.14	674.27	923.34	876.07	682.58	917.37	517.59	163.7	1136.96	624.24	624.24
LRWT_f2p0_622_transcript84888_g12	grey	577.12	640.5	433.01	335.8	312.34	616.74	224.38	405.69	119.16	176.58	161.79	125.6	185.61	393.45	393.45
LRWT_f4p0_900_transcript70063_g7	grey	741.26	440.97	911.62	713.64	1138.47	1537.46	814.88	530.58	1035.76	810.87	960.51	70.53	1896.69	670.14	670.14
LRWT_f7p0_642_transcript82931_g1	grey	866.96	1289.22	625.29	832.81	584.97	498.05	281.5	511.06	729.61	598.3	331.27	311.93	797.59	469.98	469.98
LRWT_f12p0_2736_transcript16169_g1	grey	766.39	537.73	641.03	458.12	471.08	501.27	795.67	666.41	792.65	572.18	571.71	512.19	805.03	794.57	794.57
LRWT_f2p0_783_transcript76100_g17	grey	244.9	396.54	318.07	292.52	31.82	440.14	350.03	56.42	445.04	266.89	122.15	232.81	469.14	130.8	130.8
LRWT_f2p0_880_transcript71195_g13	grey	438.97	147.22	198.02	446.99	430.31	447.99	294.65	88.69	616.51	664.32	289.55	230.01	243.36	296.97	296.97
LRWT_f13p0_1235_transcript54522_g1	grey	582.94	598.86	401.63	377.75	169.37	494.11	496.75	719.56	625	524.57	273.6	231.63	196.36	450.12	450.12
LRWT_f121p0_1063_transcript61732_g1	grey	258.87	159.85	228.11	134.91	332.68	235.34	616.15	458.9	405.35	234.55	1020.46	326.8	186.7	672.97	672.97
LRWT_f155p0_1113_transcript58018_g1	grey	561.78	338.95	729.96	360.08	655.53	642.36	917.24	490.94	319.48	429.54	473.82	572.81	503.46	360.21	360.21
LRWT_f16p0_683_transcript80686_g2	grey	57.63	351.3	84.89	283.58	404.58	23.44	147.94	11.22	111.17	634.84	741.94	393.24	249.31	150.15	150.15
LRWT_f2p0_1517_transcript45436_g3	grey	1026.75	385.01	784.72	753.04	867.83	1009.46	478.05	1142.01	930.01	852.55	1016.17	730.06	1139.37	849.7	849.7
LRWT_f8p0_354_transcript98718_g1	grey	0	556.16	98.19	85.77	117.94	400.81	395.24	202.81	252.39	1.43	279.81	388.5	1105.16	331.7	331.7
LRWT_f3p0_700_transcript80682_g10	grey	555.84	75.37	215.95	590.76	247.3	526.58	94.97	553.75	142.37	371.64	551	184.62	156.02	190.15	190.15
LRWT_f12p0_641_transcript79160_g1	grey	269.1	32.83	300.83	284.24	293.13	223.23	50.55	150.96	77.92	578.96	494.95	909.98	431.8	149.55	149.55
LRWT_f2p0_705_transcript79682_g4	grey	483.62	236.35	418.2	645.77	317.08	537.35	535.51	350.43	494.42	356.58	260.22	545.65	536.16	159.98	159.98
LRWT_f6p0_1453_transcript47589_g5	grey	439.98	416.33	160.09	362.99	146.33	242.21	50.2	114.91	317.86	352.5	56.13	138.2	25.1	200.6	200.6
LRWT_f2p0_1049_transcript63688_g11	grey	224.5	189.24	318.11	614.32	141.1	354.26	270.1	131.48	309.4	506.59	366.62	461.26	458.78	339.29	339.29
LRWT_f10p0_788_transcript75104_g1	grey	553.86	881.31	602.54	558.97	1373.17	637.6	493.86	413.2	967.26	12.72	668.63	475.57	45.32	638.64	638.64
LRWT_f9p0_1647_transcript40319_g1	grey	109.43	421.79	124.27	283.43	132.79	334.23	318.85	156.15	180.46	436.85	435.96	299.01	374.08	287.71	287.71
LRWT_f74p0_896_transcript67233_g1	grey	624.95	659.07	713.6	616.9	798.82	690.94	516.14	510.16	374.23	852.44	427.67	721.23	526.09	484.29	484.29
LRWT_f5p0_4281_transcript3192_g1	grey	169.54	68.7	36.47	65.21	3.33	352.64	564.6	215.65	4.39	294.58	106.69	107.62	0.03	294.66	294.66
LRWT_f22p0_1250_transcript54081_g1	grey	57.78	310.95	198.17	383.06	145.08	246.6	95.88	105.83	8.32	425.79	96.54	516.65	62.63	267.83	267.83
LRWT_f5p0_766_transcript75938_g2	grey	1.16	0.12	8.22	100.23	34.08	132.62	1451.93	25.35	1535.35	318.74	642.26	4.73	0.82	517.36	517.36
LRWT_f5p0_2023_transcript29569_g2	grey	849.17	540.61	576.94	303.74	356.27	440.53	720.57	639.37	374.76	435.43	493.23	499.78	540.8	606	606
LRWT_f3p0_1422_transcript48960_g6	grey	222.58	279.86	342.63	278.66	195.97	245.05	811.22	426.06	567.11	342.13	202.91	213.36	307.75	423.07	423.07
LRWT_f14p0_3483_transcript7457_g1	grey	425.84	336.33	289.5	282.25	513.72	200.85	379.84	179.68	192.67	657.38	205	556.91	337.31	331.95	331.95
LRWT_f3p0_575_transcript86714_g4	grey	177.66	279.11	218.59	179.35	234.59	296.58	97.33	558.44	510.09	295.8	51.3	107.79	308.28	0.97	0.97
LRWT_f50p0_811_transcript72073_g1	grey	605.44	232.92	329.67	359.41	598.08	242.77	200.53	131.65	83.38	252.64	164.42	413.45	151.63	333.29	333.29
LRWT_f2p0_914_transcript69445_g6	grey	266.92	0	281.55	103.53	166.24	145.32	217.08	294.59	0.21	57.47	104.99	169.68	224.07	0	0
LRWT_f3p0_447_transcript93768_g5	grey	514.71	642.43	605.15	692.02	692.32	614.53	491.28	494.78	453.88	454.01	519.48	478.96	601.74	617.99	617.99
LRWT_f2p0_563_transcript87310_g7	grey	0	274.59	235.15	246.21	53.38	20.1	111.41	298.49	124.71	38.87	16.73	195.57	244.01	162.92	162.92
LRWT_f10p0_1978_transcript29311_g1	grey	224.97	479.85	475.79	242.07	331.87	265.69	471.81	155.64	451.7	470.45	413.75	415.11	294.93	502.82	502.82
LRWT_f2p0_813_transcript74230_g10	grey	71.05	153.74	139.07	106.26	172.08	275	66.44	87.4	243.06	299.29	242.66	83.44	120.86	266.03	266.03
LRWT_f2p0_823_transcript73711_g5	grey	308.48	151.34	132.82	0	269.39	126.41	225	167.47	177.98	343.48	98.01	90.77	232.96	426.4	426.4
LRWT_f2p0_1897_transcript32873_g6	grey	372.38	348.74	321.57	275.29	442.55	363.54	276.56	332.96	720.39	324.14	595.1	851.85	362.95	549.59	549.59
LRWT_f5p0_712_transcript78251_g1	grey	138.68	16.94	308.7	146.23	52.01	129.47	188.04	91.65	156.15	35.77	119.28	379.96	319.68	5.54	5.54
LRWT_f2p0_2192_transcript26049_g4	grey	336.71	275.69	259.57	147.1	212.91	256.99	172.6	103.46	162.12	416.04	158.42	263.44	530.6	279.42	279.42
LRWT_f28p0_872_transcript69707_g1	grey	127.89	97.95	83.94	327.77	260.25	190.18	359.8	216.05	179.73	336.6	408.3	161.74	250.95	277.97	277.97
LRWT_f17p0_673_transcript79876_g1	grey	251.44	242.91	171.44	159	162.15	34.56	93.36	82.43	85.01	66.09	189.71	84.33	56.68	243.82	243.82
LRWT_f3p0_906_transcript68514_g1	grey	275.12	62.53	62.66	62.34	198.69	60.83	247.64	353.4	314.34	163.24	242.45	42.38	174.05	274.51	274.51
LRWT_f2p0_1618_transcript42033_g10	grey	424.57	379.07	468.89	348.54	352.57	366.56	538.7	475	519.71	365.93	441.9	393.56	545.59	520.13	520.13
LRWT_f7p0_780_transcript74915_g2	grey	175.84	536.05	66.25	354.72	442.22	233.79	100.67	116.47	162.79	512.31	417.53	344.58	110.32	135.1	135.1
LRWT_f3p0_744_transcript77775_g6	grey	299.89	437.01	493.76	316.95	126.84	301.66	363.19	226.61	204.38	136.96	215.63	195.08	334.01	317.11	317.11
LRWT_f2p0_671_transcript81529_g7	grey	505.92	446.63	276.69	354.35	480.29	457.56	501.82	214.2	520.24	198.21	590.44	272.3	385.09	432.61	432.61
LRWT_f2p0_772_transcript76289_g9	grey	262.33	306	150.75	257.43	184.47	292.52	58.04	60.47	140.97	424.72	330.24	269.15	273.44	155.79	155.79
LRWT_f10p0_960_transcript65300_g1	grey	539.63	502.45	597.99	613.77	435.35	609.26	687.81	453.97	372.87	301.74	378.21	364.32	337.67	431.96	431.96
LRWT_f2p0_1280_transcript53770_g2	grey	182.77	229.58	120.13	198.77	180.21	279.73	89.06	109.66	277.35	242.56	291.57	118.95	76.27	72.25	72.25
LRWT_f2p0_1089_transcript62011_g10	grey	17.98	262.61	72.37	28.31	250.32	87.83	194.76	34.47	0.27	325.07	117.37	45.07	41.29	186.63	186.63
LRWT_f3p0_804_transcript74380_g2	grey	0	80.43	160.58	20.27	17.88	324.2	96.99	0	39.03	0	380.15	7.8	113.6	150.13	150.13
LRWT_f39p0_790_transcript72820_g1	grey	183.58	114.52	411.26	218.63	203.51	185.99	405.13	231.3	90.46	367.64	253.66	391.15	315.37	265.62	265.62
LRWT_f13p0_593_transcript84278_g2	grey	113.92	3	17.88	61.77	202.63	2.75	206.7	149.9	0.24	0.23	79.9	112.11	0	70.24	70.24
LRWT_f457p0_790_transcript73392_g1	grey	213.44	97.87	79.06	114.19	98.57	109.36	1087.95	564.74	92.05	513.6	323.81	52.16	590.62	145.88	145.88
LRWT_f2p0_856_transcript72158_g11	grey	69.7	62.17	42.4	6.21	93.82	202.56	289.09	271.47	411.02	98.69	369.44	27.66	351.07	73.96	73.96
LRWT_f2p0_864_transcript71764_g5	grey	145.99	67.73	1.4	164.27	10.33	45.8	117.15	1.65	1.14	190.65	170.07	0.7	222.73	104.07	104.07
LRWT_f46p0_672_transcript77647_g1	grey	218.56	283.24	400.87	338.64	177.26	367.88	278.61	247.25	162.87	447.53	258.65	189.79	421.71	321.02	321.02
LRWT_f11p0_2447_transcript21174_g1	grey	233.93	229.29	130.83	207.16	212.96	146.04	135.16	79.85	217.18	211.5	294.74	256.74	311.73	147.63	147.63
LRWT_f3p0_2985_transcript13612_g2	grey	153.94	107.58	44.81	82.31	107.02	179.85	426.53	401.62	302.44	161.06	168.3	231.63	134.41	314.95	314.95
LRWT_f35p0_622_transcript82453_g1	grey	560.47	457.76	461.26	422.67	447.43	420.04	672.09	125.3	307.63	157.76	386.55	271.6	93.36	485.97	485.97
LRWT_f2p0_1448_transcript47949_g12	grey	28.86	148.99	105.88	291.77	132.64	162.32	161.55	81.34	8.23	149.8	64.84	404.17	54.55	212.05	212.05
LRWT_f4p0_1277_transcript54429_g7	grey	384.52	323.38	415.05	299.2	360.41	486.64	306.9	259.74	182.77	146.96	298.04	171.57	222.82	265.87	265.87
LRWT_f2p0_1153_transcript59440_g1	grey	185.02	232.62	139.67	167.68	103.43	124.91	233.02	14.92	47.33	73.03	146.35	63.25	228.78	61.23	61.23
LRWT_f10p0_3503_transcript7921_g1	grey	199.79	219.44	188.99	122.26	110.34	303.91	106.72	264.6	310.85	61.64	357.96	61.91	103.76	70.62	70.62
LRWT_f6p0_809_transcript73914_g6	grey	31.49	115.91	16.37	25.23	22.97	43.54	195.93	89.95	111.63	193.84	41.35	131.41	46.15	301.32	301.32
LRWT_f268p0_1210_transcript53940_g1	grey	486.77	372.43	430.31	350.46	315.41	401.55	571.39	472.9	469.96	386.7	336.85	344.6	455.36	501.1	501.1
LRWT_f5p0_1351_transcript51453_g2	grey	48.28	188.08	18.4	4.96	120.62	163.52	127.12	341.29	185.01	6.6	181.28	75.05	41.56	53.76	53.76
LRWT_f2p0_1374_transcript50602_g2	grey	2.12	11.88	6.01	20.39	16.84	10.07	67.44	64.71	175.93	179.54	70.39	100.73	90.97	124.33	124.33
LRWT_f4p0_722_transcript78409_g3	grey	342.19	322.5	396.37	584.38	501.3	504.54	272.99	281.09	320.43	411.69	328.84	386.98	266.75	334.91	334.91
LRWT_f8p0_444_transcript93683_g2	grey	9.76	110.89	45.96	215.08	164.55	95.51	202.29	82.02	22.79	146.75	94.33	363.6	55.87	113.21	113.21
LRWT_f3p0_1249_transcript55746_g7	grey	437	293.47	510.62	229.29	329.49	262.77	282.36	488.85	456.89	330.73	238.96	233.7	182.16	201.28	201.28
LRWT_f17p0_1498_transcript44834_g1	grey	411.2	285.59	474.46	446.84	358.23	358.7	392.97	61.17	209.68	409.46	198.53	274.54	364.59	344.44	344.44
LRWT_f460p0_444_transcript91267_g1	grey	107.34	180.87	494.81	297.83	173.96	195.44	68.39	508.89	61.41	149.27	72.44	76.61	101.18	128.43	128.43
LRWT_f34p0_1141_transcript58138_g1	grey	5.09	85.48	145.34	79.92	136.41	149.67	65.33	115.4	15.68	227.21	104.77	289.6	197.43	145.62	145.62
LRWT_f11p0_701_transcript79755_g2	grey	466.65	835.46	493.25	468.35	416.65	399.68	180.14	318.79	442.35	230.22	678.43	432.24	417.16	683.7	683.7
LRWT_f4p0_1338_transcript51951_g5	grey	334.3	332.63	361.93	158.7	182.9	243.42	291.67	292.9	171.87	232.32	205.07	154.63	283.46	304.02	304.02
LRWT_f2p0_793_transcript73030_g1	grey	200.92	210.5	207.57	150.24	88.84	156.83	178.56	95.01	124.8	82.72	90.51	74.11	121.36	179.11	179.11
LRWT_f32p0_979_transcript63756_g1	grey	257.28	191.47	208.23	97.11	142.82	135.7	271.86	274.16	122.06	157.98	303.96	225.96	187.35	257.81	257.81
LRWT_f5p0_1042_transcript60018_g1	grey	260.04	263.2	303.79	222.64	134.97	182.58	242.53	143.7	117.58	130.23	145.93	126.17	214.21	192.35	192.35
LRWT_f6p0_774_transcript75818_g1	grey	338.89	270.87	240.26	403.89	367.23	377.56	280.25	239.21	264.68	288.73	388.03	260.7	375.2	340.58	340.58
LRWT_f5p0_421_transcript92476_g1	grey	96.54	165.36	146.28	100.14	151.41	298.36	321.59	76.08	60.15	10.59	138.37	55.77	256.56	152.84	152.84
LRWT_f103p0_1229_transcript52088_g1	grey	443.77	304.38	233.54	190.21	245.07	253.83	239.1	95.35	266.12	247.77	104.82	125.75	241.7	162.06	162.06
LRWT_f2p0_852_transcript72487_g9	grey	57.92	193.41	51.73	162.57	284.65	165.73	97.56	46.39	126.91	39.99	162.53	78.2	162.22	145.47	145.47
LRWT_f2p0_596_transcript85530_g6	grey	41.16	102.74	128.64	9.11	116.9	205.26	19.18	209.79	55.51	108.56	49.6	78.6	37.07	133.02	133.02
LRWT_f9p0_1643_transcript40732_g2	grey	238.59	72.44	179.27	106.03	55.47	215.81	214.28	304.95	146	70	131.95	116.75	19.88	69.94	69.94
LRWT_f4p0_744_transcript76957_g5	grey	80.15	131.6	63.12	266.72	124.47	63.67	34.92	0	153.31	101.27	77.72	95.32	0	0	0
LRWT_f4p0_823_transcript73970_g7	grey	26.01	76.29	100.5	109.42	87.21	164.85	189.16	162.45	14.22	139.07	212.09	64.61	22.81	151.34	151.34
LRWT_f11p0_552_transcript87060_g3	grey	153.67	114.22	269.91	52.91	81.82	73.92	192.36	18.19	0	10.13	48.65	37.39	182.24	91.62	91.62
LRWT_f2p0_545_transcript88417_g11	grey	241.97	284.58	290.31	257.9	278.18	292.21	343.59	93.33	234.7	318.43	112.95	169.6	248.07	166.16	166.16
LRWT_f3p0_657_transcript82243_g2	grey	101.69	54.57	106.77	116.44	70	70.22	150.43	199.61	218.83	0	127.15	100.16	0.75	238.95	238.95
LRWT_f2p0_584_transcript86260_g15	grey	72.69	69.87	13.41	0	29.68	25.45	215.88	0	146	203.77	29.83	15.14	57.35	100.42	100.42
LRWT_f189p0_1490_transcript44322_g1	grey	227.81	190.99	190.01	110.91	171.93	202.11	225.81	273.08	210.11	120.85	140.19	150.07	125.42	128.91	128.91
LRWT_f43p0_1433_transcript45168_g1	grey	280.98	262.43	266.11	134.44	172.94	174.39	215.39	219.76	146.75	157.13	192.45	166.09	232.79	233	233
LRWT_f15p0_742_transcript76495_g1	grey	275.5	157.96	281.03	240.48	273.31	373.32	323.75	143.02	223.61	230.96	224.76	274.73	208.82	218.7	218.7
LRWT_f6p0_687_transcript79835_g3	grey	237.92	247.17	239.95	115.77	86.95	6.52	204.17	170.83	195.64	212.27	12.68	188.71	63.5	201.53	201.53
LRWT_f5p0_1384_transcript48945_g1	grey	382.92	338.09	354.5	262.84	82.65	256.63	212.5	443.16	654.07	341.66	344.31	357.37	437.46	313.01	313.01
LRWT_f22p0_776_transcript75315_g1	grey	213.45	159.16	150.67	174.52	130.23	132.61	234.06	92.34	118.26	43.75	75.25	72.86	39.38	110.71	110.71
LRWT_f328p0_917_transcript64075_g1	grey	913.77	993.11	913.7	945.71	1064.3	1304.89	987.12	903.03	959.21	935.22	873.3	786.75	840.43	875.37	875.37
LRWT_f3p0_863_transcript71816_g4	grey	187.62	181.41	73.57	221.21	141.06	215.28	100.37	120.6	194.58	157.02	104.43	107	219.37	144.56	144.56
LRWT_f2p0_1338_transcript50021_g2	grey	209.94	184.88	169.56	149.26	60.29	244.92	144.78	201.77	238.31	383.88	155.98	189.02	70.53	130.07	130.07
LRWT_f4p0_626_transcript83563_g5	grey	118.93	201.17	222.55	168.81	174.56	204.64	171.52	204.96	215.98	101.21	90.17	219.86	225.14	135.62	135.62
LRWT_f12p0_743_transcript76372_g3	grey	98.84	189.13	193.33	117.72	150.25	144.24	123.3	247.47	158.79	66.15	207.14	218.5	208.69	147.83	147.83
LRWT_f2p0_1386_transcript50246_g5	grey	186.32	1.49	23.11	26.85	50.19	46.98	93.29	27.37	70.57	130.05	94.06	0.65	66.72	8.19	8.19
LRWT_f3p0_1347_transcript51685_g1	grey	201.34	147.1	166.36	218.21	52.55	195.48	181.44	218.36	50.15	81.01	127.58	51.08	115.96	194.11	194.11
LRWT_f2p0_2409_transcript21929_g3	grey	104.45	59.86	170.68	78.97	138.46	135.43	140.47	33.41	126.36	86.62	102.45	170.38	47.35	58.89	58.89
LRWT_f5p0_1144_transcript59504_g2	grey	96.27	145.36	55.1	65.29	74.06	131.3	134.17	72.29	30.52	21.36	137.09	84.58	106.2	140.78	140.78
LRWT_f4p0_1536_transcript44799_g3	grey	124.23	18.54	21.24	58.89	12.42	69.03	58.69	3.69	3.28	90.1	6.22	57.68	112.65	68.57	68.57
LRWT_f2p0_1216_transcript56954_g4	grey	0	118.41	134.52	118.64	78.62	63.67	51.18	207.64	0	6.9	185.32	81.51	0	81.47	81.47
LRWT_f19p0_817_transcript72575_g1	grey	0.12	100.06	77.65	1.02	43.8	96.87	184.11	0.29	91.77	0.58	99.03	0.36	36.86	0.36	0.36
LRWT_f3p0_1535_transcript44833_g3	grey	159.3	95.58	4.85	13.03	73.89	56.33	95.59	1.38	9.68	79.78	53.04	59.18	5.79	92.47	92.47
LRWT_f2p0_660_transcript82235_g14	grey	164.97	181.92	208.4	150.12	214.54	282.3	352.67	315.71	85.45	128.79	218.29	194.34	173.81	140.35	140.35
LRWT_f2p0_348_transcript98676_g1	grey	62.22	127.12	26.69	83.45	32.14	151.47	152.44	150.94	84.78	83.08	84.37	47.2	187.33	70.86	70.86
LRWT_f5p0_1537_transcript44575_g3	grey	149.88	131.36	203.95	82.53	146.13	214.24	309.35	179.28	150.59	30.69	247.4	232.23	170.93	167.41	167.41
LRWT_f25p0_1571_transcript42268_g1	grey	14.23	88.15	65.74	127.2	50.86	71.02	33.84	30.06	3.04	120.86	29.52	185.05	12.07	96.31	96.31
LRWT_f28p0_2472_transcript19964_g1	grey	22.76	79.76	74.35	108.72	61.77	53.67	67.16	49.8	5.78	176.62	30.23	224.4	34.64	101.82	101.82
LRWT_f7p0_794_transcript74993_g2	grey	173.9	94.41	88.17	142.21	190.42	78.47	112.94	116.31	143.24	129.59	148.36	74.59	72.57	41.99	41.99
LRWT_f36p0_438_transcript91014_g1	grey	170.57	153.58	245.26	135.26	152.64	134.39	168.64	67.98	67.61	67.92	98.6	75.53	136.23	124.65	124.65
LRWT_f6p0_608_transcript83552_g2	grey	135.73	78.06	110.96	69.34	78.72	84.7	105.91	76.74	59.28	175.65	129.29	195.23	225.33	184.11	184.11
LRWT_f4p0_1389_transcript50171_g1	grey	21.45	98.62	83.56	48.78	65.39	64.26	129.9	99.27	57.29	122.92	132.49	122.35	55.04	156.99	156.99
LRWT_f3p0_4309_transcript2946_g1	grey	124.45	137.36	97.53	81.02	130.28	150.17	73.44	125.96	165.69	63.75	63.36	116.55	45.86	9.9	9.9
LRWT_f169p0_606_transcript83388_g1	grey	217.27	168.04	296.31	427.41	395.26	257.44	218.07	155.77	207.06	213.45	206.76	251.81	146.69	246.51	246.51
LRWT_f16p0_834_transcript71862_g1	grey	32.63	37.12	0	0.12	71.26	60.17	0	0.12	30.36	109.11	79.22	66.88	22.85	70.49	70.49
LRWT_f24p0_1010_transcript64434_g1	grey	35.92	0	152.28	51.83	133.69	79.71	59.68	93.42	32.53	42.73	80.88	59.21	89.15	112.8	112.8
LRWT_f3p0_761_transcript76851_g7	grey	163.89	36.98	127.34	27.54	2.68	71.11	258.41	35.71	53.66	0.14	40.65	0	172.63	38.27	38.27
LRWT_f3p0_2143_transcript26986_g4	grey	39.85	127.5	112.08	138.02	116.69	320.78	166.03	41.9	72.35	233.76	127.12	162.81	171.4	130.17	130.17
LRWT_f6p0_1498_transcript45932_g1	grey	48.15	30.87	36.6	53.96	21.59	81.67	44.77	996.36	833.12	2.04	61.07	9.79	88.13	144.02	144.02
LRWT_f4p0_954_transcript67689_g3	grey	246.28	214.7	118.58	192.46	173.24	296.02	110.14	170.14	224.71	244.31	216.3	91	246.52	160.86	160.86
LRWT_f2p0_845_transcript72630_g2	grey	149.51	343.57	60.76	177.74	69.38	38.19	25.56	112.97	95.07	101.83	101.55	87.29	47.55	119.09	119.09
LRWT_f2p0_2229_transcript25367_g3	grey	198.6	140.44	212.46	175.28	201.4	169.6	166.47	161.88	169.14	166.45	100.98	207.29	117.59	80.98	80.98
LRWT_f3p0_1808_transcript35450_g2	grey	188.35	119.85	133.36	266.4	315.73	197.07	118.33	145.66	155.1	305.58	189.91	184.18	130.86	156.42	156.42
LRWT_f20p0_631_transcript83248_g2	grey	58.46	94.95	144.68	47.21	117.89	93.45	138.33	79.1	40.82	126.22	70.57	40.22	303.83	69.39	69.39
LRWT_f3p0_497_transcript91098_g5	grey	173.74	155.81	134.1	281.33	25.44	160.64	134.92	198.46	28.28	78.67	141.87	51.81	69.69	150.92	150.92
LRWT_f11p0_1820_transcript33435_g1	grey	3.13	293.78	95.61	0.63	0.5	122.65	103.39	104.37	1.29	38.39	95.43	74.5	72.84	57.92	57.92
LRWT_f6p0_1270_transcript52547_g1	grey	97.35	50.14	120.25	29.01	71.7	15.66	60.42	97.89	104.67	28.95	32.73	65.72	88.56	27.19	27.19
LRWT_f2p0_1977_transcript30751_g5	grey	94.17	137.08	97.53	36.05	32.73	69.15	160.67	108.25	144.46	111.57	104.26	72.46	202.86	139.4	139.4
LRWT_f6p0_1207_transcript55331_g2	grey	82.61	74.88	139.45	142.6	117.28	68.08	67.44	115.21	146.73	163.3	51.29	117.34	84.17	76.91	76.91
LRWT_f14p0_1089_transcript61548_g1	grey	42.85	122.17	34.43	30.22	73.44	83.41	115.84	109.79	17.06	73.14	90.95	100.3	122.46	54.5	54.5
LRWT_f10p0_1064_transcript60610_g2	grey	83.43	136.89	90.72	139.44	56.57	67.22	46.85	121.87	69	158.7	67.19	139.52	129.43	91.49	91.49
LRWT_f87p0_894_transcript67796_g1	grey	353.04	317.19	324.87	267.43	267.26	272.68	254.3	297.8	137.29	263.13	171.07	231.09	180.66	281.02	281.02
LRWT_f3p0_1259_transcript54688_g1	grey	48.13	0.7	91.65	20.93	43.57	15.46	100.6	265.92	32.63	241.71	30.7	1.09	136.33	2.39	2.39
LRWT_f157p0_746_transcript72510_g1	grey	539.41	519.57	525.06	563.81	423.6	517.32	476.02	466.85	460.07	477.16	487.16	481.92	519.67	533.83	533.83
LRWT_f4p0_2568_transcript19222_g1	grey	176.97	138.93	181.53	44.46	160.91	220.15	147.58	211.67	240.13	139.51	169.16	203.06	216.41	204.43	204.43
LRWT_f3p0_1007_transcript65426_g6	grey	100.61	145.32	105.11	73.91	57.56	77.96	105.39	192.77	185.38	101.37	71.24	107.59	164.83	41.52	41.52
LRWT_f9p0_3467_transcript7743_g1	grey	108.49	139.68	122.3	128.5	104.26	154.29	74.14	120.3	134.91	53.37	65.93	109.53	78.36	20.06	20.06
LRWT_f4p0_915_transcript69037_g5	grey	37.37	114.18	131.32	34.37	116.54	77.71	84.11	82.1	69.55	128.93	185.29	53.64	118.97	126.45	126.45
LRWT_f2p0_263_transcript104087_g3	grey	85.67	23.6	39.1	36.65	57.11	50.37	115.66	107.37	0	27.17	37.67	4.04	6.7	2.96	2.96
LRWT_f9p0_1023_transcript62404_g1	grey	248.3	287.78	270.62	225.89	257.59	341.79	296.81	227.84	288.74	251.1	194.1	170.33	256.56	276.41	276.41
LRWT_f5p0_766_transcript76208_g3	grey	74.53	109.49	107.02	260.86	164.4	88.05	167.47	139.2	104.08	139.18	151.26	72.39	102.05	144.78	144.78
LRWT_f2p0_834_transcript73226_g20	grey	189.11	56.82	80.79	96.34	88.11	63.56	147.16	14.29	150.16	84.65	108.73	165.97	66.9	118.66	118.66
LRWT_f6p0_784_transcript73560_g3	grey	16.08	58.77	29.83	87.35	104.53	14.65	45.39	42.36	120.06	11.46	66.22	98.02	146.69	25	25
LRWT_f5p0_905_transcript69219_g1	grey	151.54	204.47	32.18	122.79	166.06	157.51	53.98	147.32	352.32	52.03	128.39	24.16	157.44	120.16	120.16
LRWT_f2p0_233_transcript105872_g4	grey	176.23	107.3	73.77	122.79	183.78	149.97	135.45	146.47	93.76	74.86	112.26	153.14	131.49	79.78	79.78
LRWT_f6p0_379_transcript94331_g1	grey	84.85	138.07	201.82	95.96	122.82	99.77	107.3	26.02	67	3.02	36.22	48.52	0	97.04	97.04
LRWT_f19p0_645_transcript81448_g1	grey	110.96	79.4	70.15	133.48	96.15	71.44	51.75	136.7	149.61	208.3	104.18	119.81	132.99	104.04	104.04
LRWT_f11p0_1881_transcript32409_g1	grey	53.96	97.1	131.37	71.07	63.66	100.32	148.45	24.89	181.57	82.73	124.54	17.83	121.26	70.48	70.48
LRWT_f2p0_766_transcript76559_g6	grey	34.42	41.48	70.19	85.21	41.46	48.34	52.05	87.22	6.5	72.49	5.77	23.6	31.2	9.5	9.5
LRWT_f35p0_910_transcript67814_g1	grey	127.22	112.27	133.78	64.55	64.79	77.18	106.53	101.88	86.9	95.25	63.32	66.61	77.69	127.04	127.04
LRWT_f4p0_601_transcript84481_g5	grey	29.26	78.46	102.41	64.59	93.41	200.94	392.14	142.77	11.79	30.67	8.1	7.28	36.71	30.47	30.47
LRWT_f30p0_1161_transcript58822_g1	grey	78.07	59.94	93.2	57.83	104.64	128.27	188.55	131.95	60.69	89.77	99.81	62.35	89.14	54.08	54.08
LRWT_f18p0_773_transcript74672_g1	grey	240	333.72	292	440.75	376.23	433.63	289.69	351.88	274.55	380.06	351.09	362.33	247.37	365.68	365.68
LRWT_f4p0_738_transcript76056_g2	grey	90.53	131.09	130.08	152.9	146.2	128.09	67.01	137.62	102.73	161.59	98.38	156.93	92.25	159.17	159.17
LRWT_f4p0_2476_transcript19906_g2	grey	140.61	88.22	48.14	24.33	31.58	69.66	214.11	216.21	118.3	42.48	50.15	119.77	56.87	60.38	60.38
LRWT_f8p0_831_transcript69107_g1	grey	243.34	233.37	245.69	149.79	158.12	185.87	152.04	179.55	144.81	67.87	71.71	56.84	109.81	166.56	166.56
LRWT_f3p0_1054_transcript64664_g3	grey	172.9	102.58	210.41	248.57	74.68	135.25	139.05	166.62	87.95	175.1	115.8	161.37	161.92	145.2	145.2
LRWT_f5p0_884_transcript70394_g1	grey	145.1	148.09	127.71	159.11	126.94	88.2	89.19	92.23	109.24	136.9	173.05	99.23	138.27	181.17	181.17
LRWT_f2p0_291_transcript102493_g11	grey	107.49	42.45	65.85	120.29	1.84	13.7	38.98	27.63	0	0	0	0	0	47.17	47.17
LRWT_f31p0_575_transcript81794_g1	grey	123.6	132.75	136.1	88.79	61.24	51.29	91.25	71.25	78.48	68.58	55.88	51.74	143.31	105.39	105.39
LRWT_f19p0_1693_transcript37261_g1	grey	321.65	261.06	293.95	433.14	252.95	348.89	269.71	257.49	187.18	285.33	309.8	218.68	295.48	242.19	242.19
LRWT_f16p0_513_transcript86845_g1	grey	103.15	120.26	10	86.88	138.7	54.13	76.72	71.86	63.38	99.37	28.53	40.35	225.2	54.99	54.99
LRWT_f2p0_1668_transcript40193_g8	grey	117.04	106.18	56.81	119.76	105.04	92.31	78.68	103.41	54.95	130.31	21.68	92.53	30.38	63.29	63.29
LRWT_f2p0_1473_transcript47715_g19	grey	239.77	224.87	243.32	216.72	195.74	273.6	314.72	267.16	269.03	206.04	190.72	190.99	239.46	263.04	263.04
LRWT_f2p0_1751_transcript37752_g14	grey	59.54	58.14	93.4	76.38	107.5	48.67	97.23	85.43	58.07	180.46	77.74	196.97	28.59	163.73	163.73
LRWT_f5p0_1478_transcript46629_g2	grey	67.82	38.99	36.26	5.84	29.76	25.52	118.2	28.17	86.54	17.43	67.86	78.42	55.28	105.9	105.9
LRWT_f3p0_2588_transcript18037_g1	grey	68	115.55	28.1	18.89	61.1	37.73	3.84	81.57	109.65	23.98	51.06	88.65	115.29	34.3	34.3
LRWT_f9p0_1844_transcript33202_g1	grey	51.25	26.14	134.04	38.51	45.74	61.19	93.13	37.26	125.4	43.98	91.11	65.56	86.28	100.83	100.83
LRWT_f2p0_1380_transcript50448_g9	grey	84.29	90.46	88.48	44.07	51.43	49.38	85.86	82.04	85.73	52.97	62.79	49.36	50.1	109.07	109.07
LRWT_f5p0_1587_transcript42910_g2	grey	233.77	195.66	221.08	272.54	235.75	209.63	419.27	271.33	442.91	208.82	275.07	240.74	323.15	226.17	226.17
LRWT_f208p0_623_transcript79361_g1	grey	364.38	589.5	418.85	497.8	442.86	479.69	374.18	415.93	414.3	420.74	391.91	454.86	348.52	389.48	389.48
LRWT_f27p0_1491_transcript45105_g1	grey	81.33	34.79	32.05	83.19	73.22	0.9	30.05	76.02	2.34	82.86	47	99.94	46.98	25.43	25.43
LRWT_f4p0_1705_transcript37574_g1	grey	137.5	85.54	111.28	151.46	95.9	111.56	161.18	76.49	148.5	177.07	106.26	158.13	146	99.8	99.8
LRWT_f4p0_1691_transcript39054_g2	grey	67.99	136.91	95.39	38.41	37.21	42.53	119.99	94.94	97.12	137.23	59	108.07	80.64	94.06	94.06
LRWT_f4p0_1681_transcript38681_g1	grey	16.79	66.79	53.47	1.85	67.34	36.38	56.22	1.26	88.91	2.37	1.76	126.44	10.86	27.73	27.73
LRWT_f3p0_928_transcript69863_g6	grey	67.75	118.97	83.28	84.41	51.34	103.13	178.03	57.65	78.75	205.25	128.53	94.9	128.98	146.52	146.52
LRWT_f4p0_2089_transcript28046_g1	grey	92.23	105.73	91.47	34.59	110.53	76.53	216.24	67.7	235.46	39.1	63.33	125.93	48.28	79.91	79.91
LRWT_f13p0_366_transcript97929_g2	grey	30.17	63.35	0	0	25.66	37.43	25.57	37.03	0	0	0	36.27	82.14	0	0
LRWT_f4p0_596_transcript85057_g2	grey	81.54	16.26	78.64	39.44	17.13	77.3	17.17	77.43	13.06	52.33	42.62	13.82	24.73	61.4	61.4
LRWT_f20p0_410_transcript93373_g1	grey	30.37	55.61	58.64	122.62	87.75	216.19	49.14	13.14	83.18	23.55	78.57	122.06	37.95	45.07	45.07
LRWT_f3p0_626_transcript83933_g6	grey	53.82	243.97	10.13	39.5	22.34	46.01	48.94	2.45	2.19	82.63	51.98	14.3	43.51	3.7	3.7
LRWT_f45p0_1724_transcript37167_g1	grey	350.27	607.25	376.09	326.07	375.4	362.47	277.44	402.95	277.93	369.67	341.6	407.98	191.58	344.72	344.72
LRWT_f2p0_1258_transcript55023_g1	grey	69.24	69.54	71.14	30.51	80.4	78.09	37.86	79.8	59.26	21.64	26.74	23.09	39.57	14.47	14.47
LRWT_f3p0_211_transcript108719_g10	grey	21.44	248.06	73.44	179.12	0	0	52.87	18.64	295.45	0	19.3	282.87	170.56	24.84	24.84
LRWT_f4p0_2126_transcript26675_g2	grey	227.33	193.12	205.46	206.15	270.45	194.96	145.04	211.49	275.19	188.52	219.76	185.31	152.28	153.78	153.78
LRWT_f5p0_797_transcript74114_g2	grey	163.57	158.64	155.38	65.38	86.41	93.18	98.72	130.23	125.1	36.5	73.26	96.79	117.97	132.33	132.33
LRWT_f2p0_919_transcript69236_g13	grey	168.54	145.88	143.53	103.62	169.63	110.81	115.14	100.3	166.22	169.56	108.92	144.28	142.71	156.09	156.09
LRWT_f4p0_1952_transcript29594_g1	grey	154.56	38.47	125.91	57.2	111.72	114.96	113.29	75.8	103.67	90.71	81.22	98.65	31.57	57.08	57.08
LRWT_f7p0_730_transcript74960_g1	grey	19.63	98.5	24.71	21.4	77.26	55.16	60.1	26.63	29.02	22.43	39.41	88.96	50.72	62.54	62.54
LRWT_f6p0_1634_transcript40599_g2	grey	37.67	25.18	84.43	0	72.48	14.84	21.32	109.36	86.68	2.96	56.9	90.73	24.9	32.98	32.98
LRWT_f2p0_3341_transcript9500_g2	grey	96.77	92.2	138.24	68.43	73.16	85.95	30.39	60.85	132.13	121.83	119.51	46.53	120.44	97.09	97.09
LRWT_f2p0_1649_transcript40790_g10	grey	67.08	71.83	30.91	25.3	11.65	50.23	83.1	75.77	81.61	62.52	21.94	17.35	52.04	26.61	26.61
LRWT_f8p0_1592_transcript42136_g3	grey	195.88	157.44	182.24	173.05	186.55	184.88	105.71	158.63	147.74	150.46	207.27	168.91	138.29	125.05	125.05
LRWT_f7p0_1932_transcript31811_g1	grey	333.73	286.05	369.7	291.59	435.01	476.39	397.29	309.36	343.97	356.39	321.29	342.06	369.63	346.17	346.17
LRWT_f6p0_1837_transcript32940_g1	grey	86.24	205.08	173.14	188.74	131.57	139.31	63.1	142.67	69.79	157.25	150.6	185.78	160.71	119.38	119.38
LRWT_f2p0_933_transcript68592_g6	grey	102.12	27.69	73.52	48.64	69.48	70.35	63.65	100.35	192.19	73.17	47.27	16.21	31.52	40.38	40.38
LRWT_f2p0_426_transcript94809_g3	grey	143.2	86.81	175.32	122.9	160.39	144.75	79.34	118.15	84.25	107.35	187.28	106.69	45.92	94.1	94.1
LRWT_f3p0_1338_transcript52045_g4	grey	207.08	179.97	208.36	166.81	208.22	235.98	288.29	248.09	243.47	261.45	201.95	225.17	206.67	252.45	252.45
LRWT_f4p0_744_transcript76774_g3	grey	129.15	135.48	111.04	77.71	181.69	157.17	64.52	145.15	101.82	143.87	164.63	112.57	108.03	142.99	142.99
LRWT_f18p0_3066_transcript12305_g1	grey	152.47	106.2	146.04	179.45	181.62	130.1	123.07	140.4	185.18	116.33	135.38	101.58	107.46	98.42	98.42
LRWT_f105p0_743_transcript76149_g1	grey	7.51	155.23	23.28	160.62	70.34	63.41	86	255	21.22	114.43	53.7	65.75	58.87	48.19	48.19
LRWT_f8p0_1277_transcript53772_g1	grey	139.76	109.37	143.65	126.22	139.82	132.12	98.97	71.44	98.95	94.61	115.7	113.05	86.81	76.38	76.38
LRWT_f11p0_520_transcript88879_g2	grey	147.85	168.8	171.49	140.21	73.33	120.77	127.95	105.4	78.97	73.58	111.93	59.43	159.32	148.49	148.49
LRWT_f19p0_844_transcript71643_g1	grey	26.55	1.8	9.63	61.07	31.94	63.41	53.15	99.78	134.57	13.71	83.03	31.41	85.28	9.85	9.85
LRWT_f2p0_320_transcript100796_g4	grey	80.64	107.19	21.77	47.72	104.27	58.35	18.14	84.85	44.17	96.6	77.34	5.25	60.02	46.13	46.13
LRWT_f29p0_608_transcript82516_g1	grey	420.82	459.6	362.9	626.25	436.48	502.06	396.7	417.16	373.69	437.24	387.18	397.34	417.39	419.62	419.62
LRWT_f2p0_724_transcript78677_g5	grey	143.4	184.95	146.89	110.27	91.48	88.64	225.86	124.68	75.7	66.28	125	75.15	107.37	130.25	130.25
LRWT_f6p0_735_transcript76178_g2	grey	39.26	129.89	80.56	14.62	29	86.74	29.08	64.12	103.41	36.82	47.12	66.24	64.54	82.98	82.98
LRWT_f14p0_536_transcript88229_g1	grey	33.73	74.73	57.8	44.69	37.48	51.24	12.26	7.56	70.51	66.75	52.33	18.79	45.48	10.03	10.03
LRWT_f4p0_1023_transcript60845_g1	grey	68.74	22.95	65.13	109.7	37.25	45.01	31.83	51.73	8.38	43.25	23.73	68.75	5.41	76.15	76.15
LRWT_f9p0_978_transcript65309_g1	grey	197.62	209.72	215.42	159.87	175.68	231.24	149.95	187.77	172.89	237.62	214.66	244.47	177.36	225.67	225.67
LRWT_f11p0_1118_transcript58942_g1	grey	109.66	119.95	118.63	90.05	94.19	87.34	62.51	65.51	63.46	65.86	79.5	71.35	125.31	87.89	87.89
LRWT_f2p0_1492_transcript46252_g1	grey	70.94	55.32	147.7	111.21	78.93	90.51	88.99	121.16	22.39	38.83	76.2	74.06	38.14	100.67	100.67
LRWT_f4p0_1025_transcript63438_g1	grey	76.28	115.84	97.73	72.63	96.32	48.65	52.21	111.73	112.39	97.32	56.37	57.12	65.04	74.61	74.61
LRWT_f4p0_571_transcript85073_g1	grey	85.29	72.23	20.49	91.36	44.91	26.12	79.23	22.08	65.48	61.77	39.3	67.3	60.95	0	0
LRWT_f21p0_718_transcript78085_g1	grey	45.98	32.65	73.74	94.73	99.37	108.27	25.37	45.89	28.72	132.61	126.24	152.44	27.39	47.02	47.02
LRWT_f33p0_606_transcript83979_g1	grey	137.39	87.68	116.33	87.47	74.52	82.46	63.75	124.26	84.8	140.85	96.41	129.69	103.99	129.7	129.7
LRWT_f2p0_1250_transcript55597_g3	grey	65.01	37.23	69.25	85.85	65.63	50.48	52.79	28.32	147.18	83.42	31.31	31.02	73.81	1.99	1.99
LRWT_f2p0_781_transcript76299_g9	grey	14.29	10.38	32.18	69.33	12.26	70.85	35.58	94.51	13.56	94.55	27.28	73.89	30.03	35.03	35.03
LRWT_f6p0_1102_transcript61327_g1	grey	61.53	38.4	73.37	55.46	28.77	46.22	71.31	11.78	11.22	39.34	17.05	23.43	42.55	5.7	5.7
LRWT_f3p0_1860_transcript33822_g2	grey	115.11	119.28	80.31	120.05	66.33	151.3	115.92	166.98	170.5	152.75	169.37	141.5	286.26	149.19	149.19
LRWT_f14p0_541_transcript85469_g1	grey	75.3	98.71	94.01	154.07	119.9	140.17	59.33	82.02	103.39	155.57	125.94	133.33	80.6	101.84	101.84
LRWT_f10p0_1318_transcript51854_g1	grey	183.36	117.05	88.07	95.72	77.19	106.06	39.77	56.04	124.73	74.68	51.04	71.95	145.16	61.05	61.05
LRWT_f4p0_1099_transcript60593_g6	grey	125.2	73	120.41	106.5	100.31	121.21	104.6	16.01	33.85	99.08	93.68	85.96	70.29	167.02	167.02
LRWT_f3p0_783_transcript76625_g7	grey	66.83	17.45	43.01	43.75	53.11	26.44	22.12	66.86	9.39	51.13	49.34	12.54	55.31	7.83	7.83
LRWT_f3p0_1489_transcript47047_g7	grey	83.78	8.13	22.01	61.97	20	34.28	90.64	27.33	159.83	22.38	63.59	42.71	37.04	70.48	70.48
LRWT_f9p0_1552_transcript43024_g1	grey	74.56	27.16	56.96	65.31	25.62	9.69	75.33	1.88	59.2	38.27	53.75	10.01	22.94	58.32	58.32
LRWT_f20p0_952_transcript64647_g1	grey	164.7	131.68	146.74	118.2	93.96	137.08	138.07	105.45	105.74	67.18	74.63	70.16	166.53	117.27	117.27
LRWT_f3p0_2085_transcript28215_g3	grey	62.74	37.49	70.75	60.73	67.3	60.77	68.1	63.91	40.65	21.61	27.38	19.88	35.55	14.49	14.49
LRWT_f2p0_1434_transcript48522_g12	grey	127.79	0.13	9.57	29.5	42.9	7.91	35.36	12.16	46.4	23.02	22.04	1.42	52.42	0.31	0.31
LRWT_f2p0_814_transcript74164_g11	grey	14.67	51.82	20.4	116.31	68.15	36.35	33.1	69.52	53.99	79.97	24.07	107.54	30.89	15.75	15.75
LRWT_f2p0_1878_transcript33397_g5	grey	0.17	20.73	41.67	0.48	43.11	71.71	0.7	0.7	5.3	45.27	79.71	7.84	0.81	53.4	53.4
LRWT_f5p0_508_transcript90210_g2	grey	73.04	25.7	167.93	36.24	106.74	226.48	117.58	118.07	93.26	104.03	29.2	97.57	154.18	91.31	91.31
LRWT_f3p0_1013_transcript65225_g6	grey	30.66	47.11	26.03	36.63	45.64	39.49	46.44	23.47	69.73	80.13	48.26	76.2	19.14	76.77	76.77
LRWT_f9p0_2287_transcript23082_g1	grey	149.08	125.16	99.69	71.68	78.42	78.84	103.84	144.26	99.2	65.57	75.36	83.81	90.29	104.32	104.32
LRWT_f62p0_400_transcript93781_g1	grey	212.19	138.66	203.81	184.02	142.13	180.36	195.45	126.86	77.88	106.5	125.97	63.18	112.21	119.75	119.75
LRWT_f2p0_824_transcript73720_g10	grey	28.99	104.12	57.4	59.29	121.1	85.99	60.7	93.76	42.83	36.84	106.31	77.73	36.17	96.14	96.14
LRWT_f3p0_654_transcript82797_g9	grey	101.55	83.31	134.12	131.93	75.78	98.64	108.29	82.93	44.82	84.43	88.04	33.67	28.27	113.19	113.19
LRWT_f7p0_676_transcript81095_g1	grey	54.65	57.79	25.47	46.49	25.23	57.35	66.66	8.62	13.36	22.09	41.39	18.39	81.35	56.14	56.14
LRWT_f3p0_699_transcript80041_g2	grey	111.62	71.75	94.6	23.88	115.24	21.74	84.35	67.35	103.84	45.94	107.86	64.5	36.21	100.92	100.92
LRWT_f14p0_2560_transcript18557_g1	grey	273.76	209.98	289.28	261.62	304.47	356.43	436.37	352.75	322.86	339.54	362.14	346.79	319.77	340.13	340.13
LRWT_f3p0_1002_transcript66006_g11	grey	240.79	53.9	91.69	113.77	93.07	124.45	88.22	52.38	42.25	106.54	54.65	73.42	23.47	54.92	54.92
LRWT_f3p0_908_transcript69703_g1	grey	65.08	74.91	22.83	80.77	58.61	160.38	19.36	19.72	79.7	74.86	32.27	12.68	28.21	12.9	12.9
[truncated: 2,002 more rows]
