# Supplementary material for: Integrating Metabolomics and Transcriptomics to Unveil Atisine Biosynthesis in Aconitum gymnandrum Maxim
Source: Int J Mol Sci. 2022 Nov 3;23(21):13463. doi: 10.3390/ijms232113463 (PMC9655601; doi:10.3390/ijms232113463)
Supplement: Supplementary file 1 [file ijms-23-13463-s001.zip › Supplementary Table S5.xlsx]

## Sheet: Sheet1
Supplementary Table S5. KEGG annotation results of 298 genes in the green module of A. gymnandrum
query	seed_ortholog	evalue	score	eggNOG_OGs	max_annot_lvl	COG_category	Description	Preferred_name	GOs	EC	KEGG_ko	KEGG_Pathway	KEGG_Module	KEGG_Reaction	KEGG_rclass	BRITE	KEGG_TC	CAZy	BiGG_Reaction	PFAMs
Gene.90476::LRWT_f8p0_1498_transcript45862_g2::g.90476::m.90476	218851.Aquca_118_00022.1	1.22e-148	431.0	COG3491@1|root,KOG0143@2759|Eukaryota,37RR9@33090|Viridiplantae,3GCXU@35493|Streptophyta	35493|Streptophyta	Q	Belongs to the iron ascorbate-dependent oxidoreductase family	-	-	-	ko:K06892	ko00940,ko01110,map00940,map01110	-	R11549	RC00046	ko00000,ko00001,ko01000	-	-	-	2OG-FeII_Oxy,DIOX_N
Gene.96120::LRWT_f25p0_1382_transcript49735_g1::g.96120::m.96120	218851.Aquca_118_00022.1	1.55e-147	429.0	COG3491@1|root,KOG0143@2759|Eukaryota,37RR9@33090|Viridiplantae,3GCXU@35493|Streptophyta	35493|Streptophyta	Q	Belongs to the iron ascorbate-dependent oxidoreductase family	-	-	-	ko:K06892	ko00940,ko01110,map00940,map01110	-	R11549	RC00046	ko00000,ko00001,ko01000	-	-	-	2OG-FeII_Oxy,DIOX_N
Gene.96339::LRWT_f2p0_1395_transcript49882_g6::g.96339::m.96339	218851.Aquca_102_00045.1	2.22e-130	382.0	COG3491@1|root,KOG0143@2759|Eukaryota,37S4R@33090|Viridiplantae,3GEB9@35493|Streptophyta	35493|Streptophyta	Q	Belongs to the iron ascorbate-dependent oxidoreductase family	-	-	-	-	-	-	-	-	-	-	-	-	2OG-FeII_Oxy,DIOX_N
Gene.109801::LRWT_f16p0_1131_transcript59503_g1::g.109801::m.109801	218851.Aquca_001_00657.1	6.17e-138	400.0	COG3491@1|root,KOG0143@2759|Eukaryota,37P31@33090|Viridiplantae,3G7RU@35493|Streptophyta	35493|Streptophyta	Q	Belongs to the iron ascorbate-dependent oxidoreductase family	-	GO:0005575,GO:0005622,GO:0005623,GO:0005737,GO:0044424,GO:0044464	-	-	-	-	-	-	-	-	-	-	2OG-FeII_Oxy,DIOX_N
Gene.95430::LRWT_f12p0_1384_transcript49255_g2::g.95430::m.95430	218851.Aquca_039_00116.1	1.32e-178	506.0	COG3491@1|root,KOG0143@2759|Eukaryota,37NM9@33090|Viridiplantae,3GC65@35493|Streptophyta	35493|Streptophyta	Q	Belongs to the iron ascorbate-dependent oxidoreductase family	-	-	-	-	-	-	-	-	-	-	-	-	2OG-FeII_Oxy,DIOX_N
Gene.98098::LRWT_f2p0_1362_transcript51119_g5::g.98098::m.98098	218851.Aquca_118_00022.1	3.81e-105	320.0	COG3491@1|root,KOG0143@2759|Eukaryota,37RR9@33090|Viridiplantae,3GCXU@35493|Streptophyta	35493|Streptophyta	Q	Belongs to the iron ascorbate-dependent oxidoreductase family	-	-	-	ko:K06892	ko00940,ko01110,map00940,map01110	-	R11549	RC00046	ko00000,ko00001,ko01000	-	-	-	2OG-FeII_Oxy,DIOX_N
Gene.91653::LRWT_f2p0_1428_transcript46650_g1::g.91653::m.91653	218851.Aquca_102_00045.1	5.55e-88	271.0	COG3491@1|root,KOG0143@2759|Eukaryota,37S4R@33090|Viridiplantae,3GEB9@35493|Streptophyta	35493|Streptophyta	Q	Belongs to the iron ascorbate-dependent oxidoreductase family	-	-	-	-	-	-	-	-	-	-	-	-	2OG-FeII_Oxy,DIOX_N
Gene.95908::LRWT_f4p0_1339_transcript49591_g1::g.95908::m.95908	218851.Aquca_016_00060.1	9.18e-134	389.0	COG3491@1|root,KOG0143@2759|Eukaryota	2759|Eukaryota	V	oxidoreductase activity	-	GO:0000003,GO:0000902,GO:0001101,GO:0003006,GO:0003674,GO:0003824,GO:0005575,GO:0005622,GO:0005623,GO:0005737,GO:0006082,GO:0006629,GO:0006720,GO:0006721,GO:0007154,GO:0007165,GO:0007275,GO:0007568,GO:0008150,GO:0008152,GO:0008299,GO:0008610,GO:0009058,GO:0009314,GO:0009416,GO:0009628,GO:0009648,GO:0009653,GO:0009685,GO:0009686,GO:0009719,GO:0009725,GO:0009739,GO:0009740,GO:0009755,GO:0009791,GO:…	-	-	-	-	-	-	-	-	-	-	2OG-FeII_Oxy,DIOX_N
Gene.60503::LRWT_f4p0_2059_transcript27421_g2::g.60503::m.60503	218851.Aquca_002_00164.1	4.39e-316	863.0	COG0020@1|root,2QPJ7@2759|Eukaryota,37PU7@33090|Viridiplantae,3GBJP@35493|Streptophyta	35493|Streptophyta	I	1-deoxy-D-xylulose 5-phosphate reductoisomerase	DXR	GO:0000166,GO:0003674,GO:0003824,GO:0005488,GO:0006081,GO:0006082,GO:0006090,GO:0006629,GO:0006644,GO:0006720,GO:0006721,GO:0006793,GO:0006796,GO:0008150,GO:0008152,GO:0008299,GO:0008610,GO:0008654,GO:0009058,GO:0009240,GO:0009987,GO:0016114,GO:0016491,GO:0016614,GO:0016616,GO:0019288,GO:0019637,GO:0019682,GO:0019752,GO:0030145,GO:0030604,GO:0032787,GO:0036094,GO:0043167,GO:0043168,GO:0043169,GO:…	1.1.1.267	ko:K00099	ko00900,ko01100,ko01110,ko01130,map00900,map01100,map01110,map01130	M00096	R05688	RC01452	ko00000,ko00001,ko00002,ko01000	-	-	-	DXPR_C,DXP_redisom_C,DXP_reductoisom
Gene.45440::LRWT_f2p0_2589_transcript19173_g3::g.45440::m.45440	4432.XP_010256219.1	0.0	897.0	2CKJS@1|root,2QQN6@2759|Eukaryota,37RTC@33090|Viridiplantae,3G8Z6@35493|Streptophyta	35493|Streptophyta	S	Belongs to the terpene synthase family	CPS1	GO:0000287,GO:0001101,GO:0003674,GO:0003824,GO:0005488,GO:0005575,GO:0005622,GO:0005623,GO:0005737,GO:0006082,GO:0006629,GO:0006720,GO:0006721,GO:0007154,GO:0007165,GO:0008150,GO:0008152,GO:0008299,GO:0008610,GO:0009058,GO:0009507,GO:0009536,GO:0009685,GO:0009686,GO:0009719,GO:0009725,GO:0009739,GO:0009740,GO:0009755,GO:0009905,GO:0009987,GO:0010033,GO:0010476,GO:0010817,GO:0016053,GO:0016101,GO:…	5.5.1.13,5.5.1.14	ko:K04120,ko:K14043	ko00904,ko01100,ko01110,map00904,map01100,map01110	-	R02068,R06312	RC00642	ko00000,ko00001,ko01000	-	-	-	Terpene_synth,Terpene_synth_C
Gene.39898::LRWT_f8p0_2705_transcript16317_g1::g.39898::m.39898	218851.Aquca_014_00341.1	0.0	1095.0	2CKJS@1|root,2QVGX@2759|Eukaryota,37QJ3@33090|Viridiplantae,3GEEE@35493|Streptophyta	35493|Streptophyta	S	Belongs to the terpene synthase family	KS	GO:0001101,GO:0003674,GO:0003824,GO:0005575,GO:0005622,GO:0005623,GO:0005737,GO:0006082,GO:0006629,GO:0006720,GO:0006721,GO:0007154,GO:0007165,GO:0008150,GO:0008152,GO:0008299,GO:0008610,GO:0009058,GO:0009507,GO:0009532,GO:0009536,GO:0009570,GO:0009685,GO:0009686,GO:0009719,GO:0009725,GO:0009739,GO:0009740,GO:0009755,GO:0009899,GO:0009987,GO:0010033,GO:0010333,GO:0010476,GO:0010817,GO:0016053,GO:…	4.2.3.19	ko:K04121	ko00904,ko01100,ko01110,map00904,map01100,map01110	-	R05092	RC01263	ko00000,ko00001,ko01000	-	-	-	Terpene_synth,Terpene_synth_C
Gene.37311::LRWT_f2p0_2875_transcript14997_g3::g.37311::m.37311	218851.Aquca_030_00174.1	0.0	1315.0	COG0821@1|root,2QSBY@2759|Eukaryota,37P9A@33090|Viridiplantae,3GCTI@35493|Streptophyta	35493|Streptophyta	I	4-hydroxy-3-methylbut-2-en-1-yl diphosphate synthase	-	GO:0003674,GO:0003824,GO:0005575,GO:0005622,GO:0005623,GO:0005737,GO:0006081,GO:0006082,GO:0006090,GO:0006629,GO:0006644,GO:0006720,GO:0006793,GO:0006796,GO:0008150,GO:0008152,GO:0008299,GO:0008610,GO:0008654,GO:0009058,GO:0009240,GO:0009507,GO:0009536,GO:0009987,GO:0016491,GO:0016725,GO:0019288,GO:0019637,GO:0019682,GO:0019752,GO:0032787,GO:0043226,GO:0043227,GO:0043229,GO:0043231,GO:0043436,GO:…	1.17.7.1,1.17.7.3	ko:K03526	ko00900,ko01100,ko01110,ko01130,map00900,map01100,map01110,map01130	M00096	R08689,R10859	RC01486	ko00000,ko00001,ko00002,ko01000	-	-	-	GcpE
Gene.102184::LRWT_f5p0_1248_transcript53979_g1::g.102184::m.102184	3988.XP_002531191.1	3.74e-156	449.0	COG0142@1|root,KOG0776@2759|Eukaryota,37N02@33090|Viridiplantae,3GDQS@35493|Streptophyta,4JS3J@91835|fabids	35493|Streptophyta	H	Belongs to the FPP GGPP synthase family	-	-	2.5.1.1,2.5.1.10,2.5.1.29	ko:K13789	ko00900,ko01100,ko01110,ko01130,map00900,map01100,map01110,map01130	M00364,M00366	R01658,R02003,R02061	RC00279	ko00000,ko00001,ko00002,ko01000,ko01006	-	-	-	polyprenyl_synt
Gene.97012::LRWT_f6p0_1372_transcript50353_g4::g.97012::m.97012	218851.Aquca_036_00032.1	2.3e-115	345.0	KOG3178@1|root,KOG3178@2759|Eukaryota,37PX0@33090|Viridiplantae,3GFUM@35493|Streptophyta	35493|Streptophyta	J	Belongs to the class I-like SAM-binding methyltransferase superfamily. Cation-independent O- methyltransferase family	-	GO:0003674,GO:0003824,GO:0005488,GO:0005515,GO:0005575,GO:0005622,GO:0005623,GO:0005737,GO:0006725,GO:0006807,GO:0008150,GO:0008152,GO:0008168,GO:0008171,GO:0008757,GO:0009058,GO:0009820,GO:0009821,GO:0009987,GO:0016740,GO:0016741,GO:0019438,GO:0030766,GO:0032259,GO:0034641,GO:0042802,GO:0042803,GO:0044237,GO:0044249,GO:0044271,GO:0044424,GO:0044464,GO:0046983,GO:0071704,GO:1901564,GO:1901566,GO:…	2.1.1.150,2.1.1.212,2.1.1.240,2.1.1.46	ko:K13259,ko:K13262,ko:K16040	ko00943,ko00945,ko01110,map00943,map00945,map01110	-	R02931,R06564,R06794,R07722,R07724,R09872	RC00003,RC00392,RC01558	ko00000,ko00001,ko01000	-	-	-	Dimerisation,Methyltransf_2
Gene.107993::LRWT_f2p0_1187_transcript58178_g7::g.107993::m.107993	29730.Gorai.008G272000.1	1.36e-134	390.0	KOG4701@1|root,KOG4701@2759|Eukaryota,37RVY@33090|Viridiplantae,3GAEK@35493|Streptophyta	35493|Streptophyta	G	Belongs to the glycosyl hydrolase 18 family	-	GO:0005575,GO:0005622,GO:0005623,GO:0005737,GO:0005773,GO:0043226,GO:0043227,GO:0043229,GO:0043231,GO:0044424,GO:0044444,GO:0044464	3.2.1.14	ko:K01183	ko00520,ko01100,map00520,map01100	-	R01206,R02334	RC00467	ko00000,ko00001,ko01000	-	GH18	-	Glyco_hydro_18
Gene.99983::LRWT_f5p0_1320_transcript52439_g3::g.99983::m.99983	29730.Gorai.008G272000.1	3.35e-135	392.0	KOG4701@1|root,KOG4701@2759|Eukaryota,37RVY@33090|Viridiplantae,3GAEK@35493|Streptophyta	35493|Streptophyta	G	Belongs to the glycosyl hydrolase 18 family	-	GO:0005575,GO:0005622,GO:0005623,GO:0005737,GO:0005773,GO:0043226,GO:0043227,GO:0043229,GO:0043231,GO:0044424,GO:0044444,GO:0044464	3.2.1.14	ko:K01183	ko00520,ko01100,map00520,map01100	-	R01206,R02334	RC00467	ko00000,ko00001,ko01000	-	GH18	-	Glyco_hydro_18
Gene.81137::LRWT_f4p0_1662_transcript39891_g3::g.81137::m.81137	29730.Gorai.009G342900.1	1.67e-242	671.0	COG3588@1|root,KOG1557@2759|Eukaryota,37J8J@33090|Viridiplantae,3GCU6@35493|Streptophyta	35493|Streptophyta	G	fructose-bisphosphate aldolase	-	GO:0003674,GO:0003824,GO:0004332,GO:0005575,GO:0005622,GO:0005623,GO:0005737,GO:0005739,GO:0005975,GO:0005996,GO:0006006,GO:0006082,GO:0006090,GO:0006091,GO:0006094,GO:0006096,GO:0006139,GO:0006163,GO:0006164,GO:0006165,GO:0006725,GO:0006732,GO:0006733,GO:0006753,GO:0006754,GO:0006757,GO:0006793,GO:0006796,GO:0006807,GO:0006950,GO:0006979,GO:0008150,GO:0008152,GO:0009056,GO:0009058,GO:0009108,GO:…	4.1.2.13	ko:K01623	ko00010,ko00030,ko00051,ko00680,ko00710,ko01100,ko01110,ko01120,ko01130,ko01200,ko01230,map00010,map00030,map00051,map00680,map00710,map01100,map01110,map01120,map01130,map01200,map01230	M00001,M00003,M00165,M00167	R01068,R01070,R01829,R02568	RC00438,RC00439,RC00603,RC00604	ko00000,ko00001,ko00002,ko01000,ko03036,ko04131,ko04147	-	-	-	Glycolytic
Gene.63727::LRWT_f104p0_1919_transcript29299_g1::g.63727::m.63727	218851.Aquca_002_01386.1	0.0	903.0	COG0318@1|root,KOG1176@2759|Eukaryota,37NTI@33090|Viridiplantae,3G7BK@35493|Streptophyta	35493|Streptophyta	I	butyrate--CoA ligase AAE11, peroxisomal-like	-	GO:0003674,GO:0003824,GO:0005575,GO:0005622,GO:0005623,GO:0005737,GO:0005777,GO:0006082,GO:0006629,GO:0006631,GO:0006790,GO:0006807,GO:0008150,GO:0008152,GO:0009058,GO:0009987,GO:0016143,GO:0016144,GO:0016405,GO:0016874,GO:0016877,GO:0016878,GO:0018858,GO:0019605,GO:0019748,GO:0019752,GO:0019757,GO:0019758,GO:0019760,GO:0019761,GO:0032787,GO:0042579,GO:0043226,GO:0043227,GO:0043229,GO:0043231,GO:…	-	-	-	-	-	-	-	-	-	-	AMP-binding,AMP-binding_C
Gene.97676::LRWT_f4p0_1371_transcript50810_g5::g.97676::m.97676	225117.XP_009359305.1	1.2e-20	93.2	28N77@1|root,2RKRN@2759|Eukaryota,37TCU@33090|Viridiplantae,3GFIC@35493|Streptophyta,4JJ9U@91835|fabids	35493|Streptophyta	S	Vinorine synthase-like	-	-	2.3.1.133	ko:K13065	ko00940,ko00941,ko00945,ko01100,ko01110,map00940,map00941,map00945,map01100,map01110	M00039	R01945,R02416,R07432,R07433	RC00004,RC00055,RC02864	ko00000,ko00001,ko00002,ko01000	-	-	-	Transferase
Gene.97675::LRWT_f4p0_1371_transcript50810_g5::g.97675::m.97675	3694.POPTR_0010s06650.1	1.42e-54	189.0	28IDJ@1|root,2QQQA@2759|Eukaryota,37TEM@33090|Viridiplantae,3GH5T@35493|Streptophyta,4JMJJ@91835|fabids	35493|Streptophyta	S	BAHD acyltransferase At5g47980-like	-	GO:0003674,GO:0003824,GO:0006807,GO:0008150,GO:0008152,GO:0009820,GO:0016740,GO:0016746,GO:0016747,GO:0050636,GO:0071704,GO:1901564	2.3.1.133,2.3.1.188	ko:K13065,ko:K15400	ko00073,ko00940,ko00941,ko00945,ko01100,ko01110,map00073,map00940,map00941,map00945,map01100,map01110	M00039	R01945,R02416,R07432,R07433,R09106	RC00004,RC00041,RC00055,RC02864	ko00000,ko00001,ko00002,ko01000	-	-	-	Transferase
Gene.95255::LRWT_f25p0_1372_transcript49129_g1::g.95255::m.95255	3988.XP_002515007.1	4.09e-75	248.0	28IDJ@1|root,2QQQA@2759|Eukaryota,37TEM@33090|Viridiplantae,3GH5T@35493|Streptophyta,4JMJJ@91835|fabids	35493|Streptophyta	S	BAHD acyltransferase At5g47980-like	-	GO:0003674,GO:0003824,GO:0006807,GO:0008150,GO:0008152,GO:0009820,GO:0016740,GO:0016746,GO:0016747,GO:0050636,GO:0071704,GO:1901564	2.3.1.133,2.3.1.188	ko:K13065,ko:K15400	ko00073,ko00940,ko00941,ko00945,ko01100,ko01110,map00073,map00940,map00941,map00945,map01100,map01110	M00039	R01945,R02416,R07432,R07433,R09106	RC00004,RC00041,RC00055,RC02864	ko00000,ko00001,ko00002,ko01000	-	-	-	Transferase
Gene.71321::LRWT_f16p0_1779_transcript33841_g1::g.71321::m.71321	218851.Aquca_018_00061.1	1.82e-183	525.0	COG2723@1|root,KOG0626@2759|Eukaryota,37YXF@33090|Viridiplantae,3GMXG@35493|Streptophyta	35493|Streptophyta	G	Glycosyl hydrolase family 1	-	-	3.2.1.21	ko:K01188	ko00460,ko00500,ko00940,ko01100,ko01110,map00460,map00500,map00940,map01100,map01110	-	R00026,R02558,R02887,R02985,R03527,R04949,R04998,R10035,R10039,R10040	RC00049,RC00059,RC00171,RC00262,RC00397,RC00451,RC00714,RC00746,RC01248	ko00000,ko00001,ko01000	-	GH1	-	Glyco_hydro_1
Gene.71322::LRWT_f16p0_1779_transcript33841_g1::g.71322::m.71322	218851.Aquca_018_00061.1	1.09e-68	223.0	COG2723@1|root,KOG0626@2759|Eukaryota,37YXF@33090|Viridiplantae,3GMXG@35493|Streptophyta	35493|Streptophyta	G	Glycosyl hydrolase family 1	-	-	3.2.1.21	ko:K01188	ko00460,ko00500,ko00940,ko01100,ko01110,map00460,map00500,map00940,map01100,map01110	-	R00026,R02558,R02887,R02985,R03527,R04949,R04998,R10035,R10039,R10040	RC00049,RC00059,RC00171,RC00262,RC00397,RC00451,RC00714,RC00746,RC01248	ko00000,ko00001,ko01000	-	GH1	-	Glyco_hydro_1
Gene.66439::LRWT_f2p0_1967_transcript30896_g4::g.66439::m.66439	218851.Aquca_018_00060.1	2.13e-294	813.0	COG2723@1|root,KOG0626@2759|Eukaryota,37YXF@33090|Viridiplantae,3GMXG@35493|Streptophyta	35493|Streptophyta	G	Glycosyl hydrolase family 1	-	-	3.2.1.21	ko:K01188	ko00460,ko00500,ko00940,ko01100,ko01110,map00460,map00500,map00940,map01100,map01110	-	R00026,R02558,R02887,R02985,R03527,R04949,R04998,R10035,R10039,R10040	RC00049,RC00059,RC00171,RC00262,RC00397,RC00451,RC00714,RC00746,RC01248	ko00000,ko00001,ko01000	-	GH1	-	Glyco_hydro_1
Gene.72887::LRWT_f3p0_1839_transcript34778_g7::g.72887::m.72887	218851.Aquca_002_00337.1	0.0	933.0	COG1012@1|root,KOG2450@2759|Eukaryota,37M7N@33090|Viridiplantae,3GF9P@35493|Streptophyta	35493|Streptophyta	C	Belongs to the aldehyde dehydrogenase family	BADH2	GO:0001101,GO:0003674,GO:0003824,GO:0004029,GO:0005575,GO:0005618,GO:0005622,GO:0005623,GO:0005737,GO:0005777,GO:0005829,GO:0006950,GO:0006970,GO:0008150,GO:0008152,GO:0008802,GO:0009414,GO:0009415,GO:0009507,GO:0009516,GO:0009536,GO:0009628,GO:0009651,GO:0009987,GO:0010035,GO:0016491,GO:0016620,GO:0016903,GO:0030312,GO:0033554,GO:0034059,GO:0036293,GO:0036294,GO:0042221,GO:0042579,GO:0043226,GO:…	1.2.1.8	ko:K00130	ko00260,ko01100,map00260,map01100	M00555	R02565,R02566	RC00080	ko00000,ko00001,ko00002,ko01000	-	-	-	Aldedh
Gene.63594::LRWT_f4p0_2034_transcript29219_g4::g.63594::m.63594	218851.Aquca_030_00335.1	2.23e-111	332.0	COG0126@1|root,KOG1367@2759|Eukaryota,37RUX@33090|Viridiplantae,3G8CB@35493|Streptophyta	33090|Viridiplantae	G	Belongs to the phosphoglycerate kinase family	-	GO:0005575,GO:0005622,GO:0005623,GO:0005737,GO:0009507,GO:0009536,GO:0043226,GO:0043227,GO:0043229,GO:0043231,GO:0044424,GO:0044444,GO:0044464	2.7.2.3	ko:K00927	ko00010,ko00710,ko01100,ko01110,ko01120,ko01130,ko01200,ko01230,map00010,map00710,map01100,map01110,map01120,map01130,map01200,map01230	M00001,M00002,M00003,M00165,M00166,M00308,M00552	R01512	RC00002,RC00043	ko00000,ko00001,ko00002,ko01000,ko04147	-	-	iRC1080.CRv4_Au5_s22_g9800_t1	PGK
Gene.63595::LRWT_f4p0_2034_transcript29219_g4::g.63595::m.63595	218851.Aquca_030_00335.1	1.03e-112	333.0	COG0126@1|root,KOG1367@2759|Eukaryota,37RUX@33090|Viridiplantae,3G8CB@35493|Streptophyta	33090|Viridiplantae	G	Belongs to the phosphoglycerate kinase family	-	GO:0005575,GO:0005622,GO:0005623,GO:0005737,GO:0009507,GO:0009536,GO:0043226,GO:0043227,GO:0043229,GO:0043231,GO:0044424,GO:0044444,GO:0044464	2.7.2.3	ko:K00927	ko00010,ko00710,ko01100,ko01110,ko01120,ko01130,ko01200,ko01230,map00010,map00710,map01100,map01110,map01120,map01130,map01200,map01230	M00001,M00002,M00003,M00165,M00166,M00308,M00552	R01512	RC00002,RC00043	ko00000,ko00001,ko00002,ko01000,ko04147	-	-	iRC1080.CRv4_Au5_s22_g9800_t1	PGK
Gene.144079::LRWT_f2p0_491_transcript91226_g10::g.144079::m.144079	218851.Aquca_028_00108.1	7.77e-46	160.0	KOG3178@1|root,KOG3178@2759|Eukaryota,37PDX@33090|Viridiplantae,3GE8D@35493|Streptophyta	35493|Streptophyta	GM	Belongs to the class I-like SAM-binding methyltransferase superfamily. Cation-independent O- methyltransferase family	-	-	2.1.1.111,2.1.1.68	ko:K12643,ko:K13066	ko00940,ko01058,ko01100,ko01110,map00940,map01058,map01100,map01110	M00039	R00984,R02379,R03366,R06574,R06575,R06576,R06577	RC00003,RC00335,RC00392	ko00000,ko00001,ko00002,ko01000	-	-	-	Dimerisation,Methyltransf_2
Gene.71033::LRWT_f2p0_1883_transcript33670_g11::g.71033::m.71033	981085.XP_010087965.1	3.28e-208	583.0	COG0372@1|root,KOG2617@2759|Eukaryota,37JED@33090|Viridiplantae,3GF4T@35493|Streptophyta,4JEXI@91835|fabids	35493|Streptophyta	C	citrate synthase	-	GO:0000166,GO:0003674,GO:0003824,GO:0004108,GO:0005488,GO:0005524,GO:0005575,GO:0005618,GO:0005622,GO:0005623,GO:0005737,GO:0005739,GO:0005759,GO:0006082,GO:0006091,GO:0006099,GO:0006101,GO:0008144,GO:0008150,GO:0008152,GO:0008270,GO:0009060,GO:0009507,GO:0009536,GO:0009987,GO:0010035,GO:0010038,GO:0015980,GO:0016740,GO:0016746,GO:0016999,GO:0017076,GO:0017144,GO:0019752,GO:0030312,GO:0030554,GO:…	2.3.3.1	ko:K01647	ko00020,ko00630,ko01100,ko01110,ko01120,ko01130,ko01200,ko01210,ko01230,map00020,map00630,map01100,map01110,map01120,map01130,map01200,map01210,map01230	M00009,M00010,M00012,M00740	R00351	RC00004,RC00067	br01601,ko00000,ko00001,ko00002,ko01000	-	-	-	Citrate_synt
Gene.71034::LRWT_f2p0_1883_transcript33670_g11::g.71034::m.71034	218851.Aquca_014_00879.1	8.35e-92	281.0	COG0372@1|root,KOG2617@2759|Eukaryota,37JED@33090|Viridiplantae,3GF4T@35493|Streptophyta	35493|Streptophyta	C	Belongs to the citrate synthase family	-	GO:0000166,GO:0003674,GO:0003824,GO:0004108,GO:0005488,GO:0005524,GO:0005575,GO:0005618,GO:0005622,GO:0005623,GO:0005737,GO:0005739,GO:0005759,GO:0006082,GO:0006091,GO:0006099,GO:0006101,GO:0008144,GO:0008150,GO:0008152,GO:0008270,GO:0009060,GO:0009507,GO:0009536,GO:0009987,GO:0010035,GO:0010038,GO:0015980,GO:0016740,GO:0016746,GO:0016999,GO:0017076,GO:0017144,GO:0019752,GO:0030312,GO:0030554,GO:…	2.3.3.1	ko:K01647	ko00020,ko00630,ko01100,ko01110,ko01120,ko01130,ko01200,ko01210,ko01230,map00020,map00630,map01100,map01110,map01120,map01130,map01200,map01210,map01230	M00009,M00010,M00012,M00740	R00351	RC00004,RC00067	br01601,ko00000,ko00001,ko00002,ko01000	-	-	-	Citrate_synt
Gene.67467::LRWT_f2p0_1947_transcript31513_g3::g.67467::m.67467	218851.Aquca_086_00037.1	1.99e-53	182.0	COG2124@1|root,KOG0157@2759|Eukaryota,37IXF@33090|Viridiplantae,3G9DS@35493|Streptophyta	35493|Streptophyta	Q	Belongs to the cytochrome P450 family	-	-	-	ko:K10717,ko:K20660	ko00908,ko01100,ko01110,map00908,map01100,map01110	-	R08053,R08054,R08055	RC01137	ko00000,ko00001,ko00199	-	-	-	p450
Gene.67465::LRWT_f2p0_1947_transcript31513_g3::g.67465::m.67465	218851.Aquca_086_00045.1	1.3e-119	358.0	COG2124@1|root,KOG0157@2759|Eukaryota,37IXF@33090|Viridiplantae,3G9DS@35493|Streptophyta	35493|Streptophyta	Q	Belongs to the cytochrome P450 family	-	-	-	ko:K10717,ko:K20660	ko00908,ko01100,ko01110,map00908,map01100,map01110	-	R08053,R08054,R08055	RC01137	ko00000,ko00001,ko00199	-	-	-	p450
Gene.67466::LRWT_f2p0_1947_transcript31513_g3::g.67466::m.67466	218851.Aquca_086_00045.1	2.04e-72	232.0	COG2124@1|root,KOG0157@2759|Eukaryota,37IXF@33090|Viridiplantae,3G9DS@35493|Streptophyta	35493|Streptophyta	Q	Belongs to the cytochrome P450 family	-	-	-	ko:K10717,ko:K20660	ko00908,ko01100,ko01110,map00908,map01100,map01110	-	R08053,R08054,R08055	RC01137	ko00000,ko00001,ko00199	-	-	-	p450
Gene.67562::LRWT_f3p0_1960_transcript31575_g5::g.67562::m.67562	218851.Aquca_011_00458.1	5.5e-212	603.0	COG2124@1|root,KOG0156@2759|Eukaryota,37MB9@33090|Viridiplantae,3GBWD@35493|Streptophyta	35493|Streptophyta	Q	cytochrome P450	-	-	1.14.14.1,1.14.14.19,1.14.14.32	ko:K00512,ko:K07408,ko:K07418	ko00140,ko00380,ko00590,ko00591,ko00830,ko00980,ko01100,ko04212,ko04726,ko04750,ko04913,ko04917,ko04927,ko04934,ko05204,map00140,map00380,map00590,map00591,map00830,map00980,map01100,map04212,map04726,map04750,map04913,map04917,map04927,map04934,map05204	M00109,M00110	R02211,R02354,R02355,R03089,R03408,R03629,R03783,R04852,R04853,R07000,R07001,R07021,R07022,R07042,R07043,R07044,R07045,R07046,R07048,R07050,R07051,R07052,R07055,R07056,R07079,R07080,R07081,R07085,R07087,R07098,R07099,R08390,R08392,R08517,R08518,R09418,R09423,R09442	RC00046,RC00607,RC00660,RC00661,RC00704,RC00723,RC00724,RC00923,RC01184,RC01222,RC01444,RC01445,RC01710,RC01711,RC01723,RC01725,RC01727,RC01732,RC01733,RC02531	ko00000,ko00001,ko00002,ko00199,ko01000	-	-	-	p450
Gene.63220::LRWT_f16p0_2021_transcript28993_g1::g.63220::m.63220	218851.Aquca_011_00458.1	9.76e-212	603.0	COG2124@1|root,KOG0156@2759|Eukaryota,37MB9@33090|Viridiplantae,3GBWD@35493|Streptophyta	35493|Streptophyta	Q	cytochrome P450	-	-	1.14.14.1,1.14.14.19,1.14.14.32	ko:K00512,ko:K07408,ko:K07418	ko00140,ko00380,ko00590,ko00591,ko00830,ko00980,ko01100,ko04212,ko04726,ko04750,ko04913,ko04917,ko04927,ko04934,ko05204,map00140,map00380,map00590,map00591,map00830,map00980,map01100,map04212,map04726,map04750,map04913,map04917,map04927,map04934,map05204	M00109,M00110	R02211,R02354,R02355,R03089,R03408,R03629,R03783,R04852,R04853,R07000,R07001,R07021,R07022,R07042,R07043,R07044,R07045,R07046,R07048,R07050,R07051,R07052,R07055,R07056,R07079,R07080,R07081,R07085,R07087,R07098,R07099,R08390,R08392,R08517,R08518,R09418,R09423,R09442	RC00046,RC00607,RC00660,RC00661,RC00704,RC00723,RC00724,RC00923,RC01184,RC01222,RC01444,RC01445,RC01710,RC01711,RC01723,RC01725,RC01727,RC01732,RC01733,RC02531	ko00000,ko00001,ko00002,ko00199,ko01000	-	-	-	p450
Gene.72648::LRWT_f9p0_1780_transcript34646_g1::g.72648::m.72648	218851.Aquca_011_00458.1	3.3e-212	604.0	COG2124@1|root,KOG0156@2759|Eukaryota,37MB9@33090|Viridiplantae,3GBWD@35493|Streptophyta	35493|Streptophyta	Q	cytochrome P450	-	-	1.14.14.1,1.14.14.19,1.14.14.32	ko:K00512,ko:K07408,ko:K07418	ko00140,ko00380,ko00590,ko00591,ko00830,ko00980,ko01100,ko04212,ko04726,ko04750,ko04913,ko04917,ko04927,ko04934,ko05204,map00140,map00380,map00590,map00591,map00830,map00980,map01100,map04212,map04726,map04750,map04913,map04917,map04927,map04934,map05204	M00109,M00110	R02211,R02354,R02355,R03089,R03408,R03629,R03783,R04852,R04853,R07000,R07001,R07021,R07022,R07042,R07043,R07044,R07045,R07046,R07048,R07050,R07051,R07052,R07055,R07056,R07079,R07080,R07081,R07085,R07087,R07098,R07099,R08390,R08392,R08517,R08518,R09418,R09423,R09442	RC00046,RC00607,RC00660,RC00661,RC00704,RC00723,RC00724,RC00923,RC01184,RC01222,RC01444,RC01445,RC01710,RC01711,RC01723,RC01725,RC01727,RC01732,RC01733,RC02531	ko00000,ko00001,ko00002,ko00199,ko01000	-	-	-	p450
Gene.68125::LRWT_f11p0_1858_transcript31908_g1::g.68125::m.68125	218851.Aquca_093_00003.1	3.85e-178	516.0	COG2124@1|root,KOG0156@2759|Eukaryota,37MB9@33090|Viridiplantae,3GBWD@35493|Streptophyta	35493|Streptophyta	Q	cytochrome P450	-	-	1.14.14.1,1.14.14.19,1.14.14.32	ko:K00512,ko:K07408,ko:K07418	ko00140,ko00380,ko00590,ko00591,ko00830,ko00980,ko01100,ko04212,ko04726,ko04750,ko04913,ko04917,ko04927,ko04934,ko05204,map00140,map00380,map00590,map00591,map00830,map00980,map01100,map04212,map04726,map04750,map04913,map04917,map04927,map04934,map05204	M00109,M00110	R02211,R02354,R02355,R03089,R03408,R03629,R03783,R04852,R04853,R07000,R07001,R07021,R07022,R07042,R07043,R07044,R07045,R07046,R07048,R07050,R07051,R07052,R07055,R07056,R07079,R07080,R07081,R07085,R07087,R07098,R07099,R08390,R08392,R08517,R08518,R09418,R09423,R09442	RC00046,RC00607,RC00660,RC00661,RC00704,RC00723,RC00724,RC00923,RC01184,RC01222,RC01444,RC01445,RC01710,RC01711,RC01723,RC01725,RC01727,RC01732,RC01733,RC02531	ko00000,ko00001,ko00002,ko00199,ko01000	-	-	-	p450
Gene.75210::LRWT_f13p0_1683_transcript36192_g1::g.75210::m.75210	218851.Aquca_020_00534.1	5.37e-238	669.0	COG2124@1|root,KOG0156@2759|Eukaryota,37HQJ@33090|Viridiplantae,3GC9K@35493|Streptophyta	35493|Streptophyta	Q	Belongs to the cytochrome P450 family	-	GO:0005575,GO:0005622,GO:0005623,GO:0005737,GO:0005783,GO:0005789,GO:0012505,GO:0016020,GO:0031090,GO:0031984,GO:0042175,GO:0043226,GO:0043227,GO:0043229,GO:0043231,GO:0044422,GO:0044424,GO:0044425,GO:0044432,GO:0044444,GO:0044446,GO:0044464,GO:0098827	-	ko:K20623	ko00905,ko01100,ko01110,map00905,map01100,map01110	-	R07470,R07474	RC00661	ko00000,ko00001,ko00199	-	-	-	p450
Gene.75886::LRWT_f6p0_1730_transcript36601_g2::g.75886::m.75886	218851.Aquca_026_00269.1	1.39e-196	563.0	COG2124@1|root,KOG0156@2759|Eukaryota,37PAK@33090|Viridiplantae,3G7H0@35493|Streptophyta	35493|Streptophyta	Q	cytochrome P450	-	GO:0003674,GO:0003824,GO:0004497,GO:0005575,GO:0005622,GO:0005623,GO:0005737,GO:0005783,GO:0005789,GO:0008150,GO:0008152,GO:0009058,GO:0012505,GO:0016020,GO:0016491,GO:0016705,GO:0016709,GO:0019748,GO:0031090,GO:0031984,GO:0042175,GO:0043226,GO:0043227,GO:0043229,GO:0043231,GO:0044422,GO:0044424,GO:0044425,GO:0044432,GO:0044444,GO:0044446,GO:0044464,GO:0044550,GO:0055114,GO:0098827	-	ko:K20562	-	-	-	-	ko00000,ko00199	-	-	-	p450
Gene.79297::LRWT_f31p0_1619_transcript38746_g2::g.79297::m.79297	3750.XP_008374387.1	6.47e-191	549.0	COG2124@1|root,KOG0156@2759|Eukaryota,37PSS@33090|Viridiplantae,3GD4J@35493|Streptophyta,4JD2P@91835|fabids	35493|Streptophyta	Q	Cytochrome p450	-	GO:0003674,GO:0003824,GO:0004497,GO:0005575,GO:0008150,GO:0008152,GO:0009058,GO:0016020,GO:0016491,GO:0016705,GO:0016709,GO:0019748,GO:0044550,GO:0055114	-	ko:K20617	-	-	-	-	ko00000,ko00199	-	-	-	p450
Gene.44472::LRWT_f2p0_2623_transcript18661_g3::g.44472::m.44472	218851.Aquca_096_00018.1	1.19e-188	541.0	COG0369@1|root,KOG1158@2759|Eukaryota,37K3K@33090|Viridiplantae,3G9A7@35493|Streptophyta	35493|Streptophyta	C	belongs to the flavoprotein pyridine nucleotide cytochrome reductase family	ATR2	GO:0003674,GO:0003824,GO:0003958,GO:0005575,GO:0005622,GO:0005623,GO:0005737,GO:0005783,GO:0006725,GO:0008150,GO:0008152,GO:0009507,GO:0009536,GO:0009698,GO:0009987,GO:0012505,GO:0016491,GO:0016651,GO:0016653,GO:0019748,GO:0043226,GO:0043227,GO:0043229,GO:0043231,GO:0044237,GO:0044424,GO:0044444,GO:0044464,GO:0055114,GO:0071704,GO:1901360	1.6.2.4	ko:K00327	-	-	-	-	ko00000,ko01000	-	-	-	FAD_binding_1,Flavodoxin_1,NAD_binding_1
Gene.44471::LRWT_f2p0_2623_transcript18661_g3::g.44471::m.44471	218851.Aquca_096_00018.1	5.48e-173	503.0	COG0369@1|root,KOG1158@2759|Eukaryota,37K3K@33090|Viridiplantae,3G9A7@35493|Streptophyta	35493|Streptophyta	C	belongs to the flavoprotein pyridine nucleotide cytochrome reductase family	ATR2	GO:0003674,GO:0003824,GO:0003958,GO:0005575,GO:0005622,GO:0005623,GO:0005737,GO:0005783,GO:0006725,GO:0008150,GO:0008152,GO:0009507,GO:0009536,GO:0009698,GO:0009987,GO:0012505,GO:0016491,GO:0016651,GO:0016653,GO:0019748,GO:0043226,GO:0043227,GO:0043229,GO:0043231,GO:0044237,GO:0044424,GO:0044444,GO:0044464,GO:0055114,GO:0071704,GO:1901360	1.6.2.4	ko:K00327	-	-	-	-	ko00000,ko01000	-	-	-	FAD_binding_1,Flavodoxin_1,NAD_binding_1
Gene.72440::LRWT_f3p0_1838_transcript34521_g1::g.72440::m.72440	218851.Aquca_012_00226.1	5.07e-197	564.0	COG2124@1|root,KOG0156@2759|Eukaryota	2759|Eukaryota	Q	iron ion binding	-	-	-	-	-	-	-	-	-	-	-	-	p450
Gene.92803::LRWT_f6p0_1450_transcript47432_g4::g.92803::m.92803	2711.XP_006473775.1	1.78e-88	283.0	28IDJ@1|root,2QQQA@2759|Eukaryota,37TEM@33090|Viridiplantae,3GBSX@35493|Streptophyta	35493|Streptophyta	S	BAHD acyltransferase At5g47980-like	-	-	-	-	-	-	-	-	-	-	-	-	Transferase
Gene.42782::LRWT_f3p0_2675_transcript17784_g1::g.42782::m.42782	218851.Aquca_010_00247.1	0.0	1251.0	COG0021@1|root,KOG0523@2759|Eukaryota,37KST@33090|Viridiplantae,3G7GX@35493|Streptophyta	35493|Streptophyta	G	1-deoxy-D-xylulose-5-phosphate synthase	-	-	2.2.1.7	ko:K01662	ko00730,ko00900,ko01100,ko01110,ko01130,map00730,map00900,map01100,map01110,map01130	M00096	R05636	RC00032	ko00000,ko00001,ko00002,ko01000	-	-	-	DXP_synthase_N,Transket_pyr,Transketolase_C
Gene.49546::LRWT_f13p0_2438_transcript21356_g2::g.49546::m.49546	218851.Aquca_010_00247.1	0.0	1229.0	COG0021@1|root,KOG0523@2759|Eukaryota,37KST@33090|Viridiplantae,3G7GX@35493|Streptophyta	35493|Streptophyta	G	1-deoxy-D-xylulose-5-phosphate synthase	-	-	2.2.1.7	ko:K01662	ko00730,ko00900,ko01100,ko01110,ko01130,map00730,map00900,map01100,map01110,map01130	M00096	R05636	RC00032	ko00000,ko00001,ko00002,ko01000	-	-	-	DXP_synthase_N,Transket_pyr,Transketolase_C
Gene.53588::LRWT_f6p0_2274_transcript23538_g1::g.53588::m.53588	218851.Aquca_006_00311.1	0.0	1035.0	COG0642@1|root,KOG0519@2759|Eukaryota,37I6R@33090|Viridiplantae,3G8U0@35493|Streptophyta	35493|Streptophyta	T	May act early in the ethylene signal transduction pathway, possibly as an ethylene receptor, or as a regulator of the pathway	ETR1	GO:0003674,GO:0003824,GO:0004672,GO:0004673,GO:0005488,GO:0005575,GO:0005622,GO:0005623,GO:0005737,GO:0005783,GO:0006464,GO:0006468,GO:0006793,GO:0006796,GO:0006807,GO:0008150,GO:0008152,GO:0009966,GO:0009968,GO:0009987,GO:0010104,GO:0010105,GO:0010646,GO:0010648,GO:0012505,GO:0016301,GO:0016310,GO:0016740,GO:0016772,GO:0016773,GO:0016775,GO:0018106,GO:0018193,GO:0018202,GO:0019538,GO:0023051,GO:…	-	ko:K14509	ko04016,ko04075,map04016,map04075	-	-	-	ko00000,ko00001,ko01000	-	-	-	GAF,HATPase_c,HisKA,Response_reg
Gene.134915::LRWT_f4p0_677_transcript80112_g5::g.134915::m.134915	3694.POPTR_0014s15910.1	1.42e-99	290.0	COG0361@1|root,KOG3403@2759|Eukaryota,37TUW@33090|Viridiplantae,3GEXE@35493|Streptophyta,4JNZ3@91835|fabids	35493|Streptophyta	J	Seems to be required for maximal rate of protein biosynthesis. Enhances ribosome dissociation into subunits and stabilizes the binding of the initiator Met-tRNA(I) to 40 S ribosomal subunits	-	-	-	ko:K03236	ko03013,map03013	-	-	-	ko00000,ko00001,ko03012	-	-	-	eIF-1a
Gene.101844::LRWT_f9p0_1274_transcript53749_g1::g.101844::m.101844	218851.Aquca_014_00823.1	3.86e-207	577.0	COG0524@1|root,KOG2855@2759|Eukaryota,37KZV@33090|Viridiplantae,3GFFE@35493|Streptophyta	35493|Streptophyta	G	Belongs to the carbohydrate kinase PfkB family	frk1	GO:0003674,GO:0003824,GO:0004396,GO:0005575,GO:0005622,GO:0005623,GO:0005737,GO:0005829,GO:0005886,GO:0005911,GO:0005975,GO:0005996,GO:0006000,GO:0006793,GO:0006796,GO:0008150,GO:0008152,GO:0008865,GO:0009506,GO:0009987,GO:0016020,GO:0016301,GO:0016310,GO:0016740,GO:0016772,GO:0016773,GO:0019200,GO:0019318,GO:0030054,GO:0044237,GO:0044238,GO:0044262,GO:0044281,GO:0044424,GO:0044444,GO:0044464,GO:…	2.7.1.4	ko:K00847	ko00051,ko00500,ko00520,ko01100,map00051,map00500,map00520,map01100	-	R00760,R00867,R03920	RC00002,RC00017	ko00000,ko00001,ko01000	-	-	-	PfkB
Gene.105112::LRWT_f24p0_1173_transcript56080_g1::g.105112::m.105112	218851.Aquca_013_00490.1	8.49e-146	420.0	COG0657@1|root,KOG1515@2759|Eukaryota	2759|Eukaryota	I	carboxylic ester hydrolase activity	-	GO:0003674,GO:0003824,GO:0008150,GO:0008152,GO:0009056,GO:0016787	-	-	-	-	-	-	-	-	-	-	Abhydrolase_3
Gene.89356::LRWT_f5p0_1500_transcript45115_g1::g.89356::m.89356	981085.XP_010112922.1	6.42e-157	452.0	2BWCF@1|root,2QSNZ@2759|Eukaryota,37NDB@33090|Viridiplantae,3GD49@35493|Streptophyta,4JDK5@91835|fabids	35493|Streptophyta	S	Glutelin type-A	-	-	-	-	-	-	-	-	-	-	-	-	Cupin_1
Gene.87171::LRWT_f2p0_1569_transcript43704_g11::g.87171::m.87171	3694.POPTR_0004s07320.1	1.01e-292	800.0	COG0538@1|root,KOG1526@2759|Eukaryota,37IAT@33090|Viridiplantae,3GCE8@35493|Streptophyta,4JNS8@91835|fabids	35493|Streptophyta	C	Isocitrate dehydrogenase NADP	IDH	GO:0005575,GO:0005622,GO:0005623,GO:0005737,GO:0044424,GO:0044464	1.1.1.42	ko:K00031	ko00020,ko00480,ko00720,ko01100,ko01110,ko01120,ko01130,ko01200,ko01210,ko01230,ko04146,map00020,map00480,map00720,map01100,map01110,map01120,map01130,map01200,map01210,map01230,map04146	M00009,M00010,M00173,M00740	R00267,R00268,R01899	RC00001,RC00084,RC00114,RC00626,RC02801	br01601,ko00000,ko00001,ko00002,ko01000	-	-	-	Iso_dh
Gene.64018::LRWT_f5p0_2009_transcript29480_g2::g.64018::m.64018	218851.Aquca_009_00808.1	0.0	888.0	COG2132@1|root,KOG1263@2759|Eukaryota,37QQ0@33090|Viridiplantae,3GG7F@35493|Streptophyta	35493|Streptophyta	Q	Belongs to the multicopper oxidase family	-	GO:0000003,GO:0003006,GO:0003674,GO:0003824,GO:0007275,GO:0008150,GO:0008152,GO:0009791,GO:0010035,GO:0010038,GO:0010228,GO:0016491,GO:0016722,GO:0022414,GO:0032501,GO:0032502,GO:0042221,GO:0046688,GO:0048608,GO:0048731,GO:0048856,GO:0050896,GO:0055114,GO:0061458	1.10.3.2	ko:K05909	-	-	-	-	ko00000,ko01000	-	-	-	Cu-oxidase,Cu-oxidase_2,Cu-oxidase_3
Gene.63723::LRWT_f4p0_1979_transcript29295_g1::g.63723::m.63723	218851.Aquca_030_00128.1	1.76e-217	622.0	28MUD@1|root,2QUH3@2759|Eukaryota,37M76@33090|Viridiplantae,3G7DK@35493|Streptophyta	35493|Streptophyta	S	synthase	-	-	4.2.3.112,4.2.3.16	ko:K21926	ko00902,ko01100,ko01110,map00902,map01100,map01110	-	R02013	RC02771	ko00000,ko00001,ko01000	-	-	-	Terpene_synth,Terpene_synth_C
Gene.61188::LRWT_f9p0_2085_transcript27804_g2::g.61188::m.61188	218851.Aquca_012_00257.1	0.0	895.0	28MUD@1|root,2QUH3@2759|Eukaryota,37M76@33090|Viridiplantae,3G7DK@35493|Streptophyta	35493|Streptophyta	S	synthase	-	-	4.2.3.112,4.2.3.16	ko:K21926	ko00902,ko01100,ko01110,map00902,map01100,map01110	-	R02013	RC02771	ko00000,ko00001,ko01000	-	-	-	Terpene_synth,Terpene_synth_C
Gene.36979::LRWT_f7p0_2870_transcript14850_g1::g.36979::m.36979	218851.Aquca_009_00189.1	0.0	924.0	28IFU@1|root,2QQSP@2759|Eukaryota,37IPE@33090|Viridiplantae,3GE0G@35493|Streptophyta	35493|Streptophyta	E	Plant lipoxygenase may be involved in a number of diverse aspects of plant physiology including growth and development, pest resistance, and senescence or responses to wounding	-	GO:0001101,GO:0003674,GO:0003824,GO:0005575,GO:0005622,GO:0005623,GO:0005737,GO:0006082,GO:0006629,GO:0006631,GO:0006690,GO:0006950,GO:0008150,GO:0008152,GO:0009058,GO:0009507,GO:0009526,GO:0009532,GO:0009534,GO:0009535,GO:0009536,GO:0009570,GO:0009579,GO:0009605,GO:0009607,GO:0009611,GO:0009617,GO:0009620,GO:0009694,GO:0009695,GO:0009719,GO:0009725,GO:0009751,GO:0009753,GO:0009941,GO:0009987,GO:…	1.13.11.12	ko:K00454	ko00591,ko00592,ko01100,ko01110,map00591,map00592,map01100,map01110	M00113	R03626,R07864,R07869	RC00561	ko00000,ko00001,ko00002,ko01000	-	-	-	Lipoxygenase,PLAT
Gene.36980::LRWT_f7p0_2870_transcript14850_g1::g.36980::m.36980	218851.Aquca_009_00189.1	4.64e-152	455.0	28IFU@1|root,2QQSP@2759|Eukaryota,37IPE@33090|Viridiplantae,3GE0G@35493|Streptophyta	35493|Streptophyta	E	Plant lipoxygenase may be involved in a number of diverse aspects of plant physiology including growth and development, pest resistance, and senescence or responses to wounding	-	GO:0001101,GO:0003674,GO:0003824,GO:0005575,GO:0005622,GO:0005623,GO:0005737,GO:0006082,GO:0006629,GO:0006631,GO:0006690,GO:0006950,GO:0008150,GO:0008152,GO:0009058,GO:0009507,GO:0009526,GO:0009532,GO:0009534,GO:0009535,GO:0009536,GO:0009570,GO:0009579,GO:0009605,GO:0009607,GO:0009611,GO:0009617,GO:0009620,GO:0009694,GO:0009695,GO:0009719,GO:0009725,GO:0009751,GO:0009753,GO:0009941,GO:0009987,GO:…	1.13.11.12	ko:K00454	ko00591,ko00592,ko01100,ko01110,map00591,map00592,map01100,map01110	M00113	R03626,R07864,R07869	RC00561	ko00000,ko00001,ko00002,ko01000	-	-	-	Lipoxygenase,PLAT
Gene.71015::LRWT_f8p0_1840_transcript33658_g2::g.71015::m.71015	218851.Aquca_007_00130.1	1.19e-287	790.0	COG0761@1|root,2QPIQ@2759|Eukaryota,37JYF@33090|Viridiplantae,3GAV2@35493|Streptophyta	35493|Streptophyta	IM	4-hydroxy-3-methylbut-2-enyl diphosphate reductase	-	GO:0003674,GO:0003824,GO:0005575,GO:0005622,GO:0005623,GO:0005737,GO:0006081,GO:0006082,GO:0006090,GO:0006629,GO:0006644,GO:0006720,GO:0006793,GO:0006796,GO:0008150,GO:0008152,GO:0008299,GO:0008610,GO:0008654,GO:0009058,GO:0009240,GO:0009507,GO:0009532,GO:0009536,GO:0009570,GO:0009987,GO:0016491,GO:0016725,GO:0019288,GO:0019637,GO:0019682,GO:0019752,GO:0032787,GO:0043226,GO:0043227,GO:0043229,GO:…	1.17.7.4	ko:K03527	ko00900,ko01100,ko01110,ko01130,map00900,map01100,map01110,map01130	M00096	R05884,R08210	RC01137,RC01487	ko00000,ko00001,ko00002,ko01000	-	-	-	LYTB
Gene.69193::LRWT_f47p0_1863_transcript32559_g1::g.69193::m.69193	218851.Aquca_054_00078.1	0.0	938.0	KOG0254@1|root,KOG0254@2759|Eukaryota,37HW1@33090|Viridiplantae,3GBKE@35493|Streptophyta	35493|Streptophyta	U	Belongs to the major facilitator superfamily. Sugar transporter (TC 2.A.1.1) family	-	GO:0001101,GO:0003674,GO:0005215,GO:0005351,GO:0005355,GO:0005356,GO:0005358,GO:0005402,GO:0005575,GO:0005623,GO:0005886,GO:0005911,GO:0006810,GO:0006811,GO:0006812,GO:0006950,GO:0006970,GO:0008150,GO:0008324,GO:0008643,GO:0008645,GO:0009414,GO:0009415,GO:0009506,GO:0009628,GO:0009651,GO:0009679,GO:0009719,GO:0009725,GO:0009737,GO:0010033,GO:0010035,GO:0015075,GO:0015077,GO:0015078,GO:0015144,GO:…	-	-	-	-	-	-	-	-	-	-	Sugar_tr
Gene.74927::LRWT_f53p0_1768_transcript36023_g1::g.74927::m.74927	218851.Aquca_026_00083.1	8.78e-295	811.0	KOG0254@1|root,KOG0254@2759|Eukaryota,37NK1@33090|Viridiplantae,3GACZ@35493|Streptophyta	2759|Eukaryota	U	Belongs to the major facilitator superfamily. Sugar transporter (TC 2.A.1.1) family	-	GO:0000041,GO:0000325,GO:0003674,GO:0005215,GO:0005351,GO:0005355,GO:0005402,GO:0005575,GO:0005622,GO:0005623,GO:0005737,GO:0005773,GO:0005774,GO:0006810,GO:0006811,GO:0006812,GO:0006829,GO:0008150,GO:0008324,GO:0008643,GO:0008645,GO:0009507,GO:0009536,GO:0009705,GO:0015075,GO:0015077,GO:0015078,GO:0015144,GO:0015145,GO:0015149,GO:0015291,GO:0015293,GO:0015294,GO:0015295,GO:0015318,GO:0015672,GO:…	-	ko:K08139,ko:K08145	ko04113,map04113	-	-	-	ko00000,ko00001,ko02000	2.A.1.1,2.A.1.1.46	-	-	Sugar_tr
Gene.42444::LRWT_f5p0_2687_transcript17606_g2::g.42444::m.42444	218851.Aquca_004_00598.1	1.56e-223	634.0	COG0620@1|root,KOG2263@2759|Eukaryota,37MWV@33090|Viridiplantae,3G84Z@35493|Streptophyta	35493|Streptophyta	E	5-methyltetrahydropteroyltriglutamate-- homocysteine	-	GO:0000096,GO:0000097,GO:0003674,GO:0003824,GO:0003871,GO:0005575,GO:0005576,GO:0005622,GO:0005623,GO:0005737,GO:0005829,GO:0006082,GO:0006520,GO:0006555,GO:0006790,GO:0006807,GO:0008150,GO:0008152,GO:0008168,GO:0008172,GO:0008652,GO:0008705,GO:0009058,GO:0009066,GO:0009067,GO:0009086,GO:0009987,GO:0016053,GO:0016740,GO:0016741,GO:0019752,GO:0032259,GO:0042084,GO:0042085,GO:0043436,GO:0044237,GO:…	2.1.1.14	ko:K00549	ko00270,ko00450,ko01100,ko01110,ko01230,map00270,map00450,map01100,map01110,map01230	M00017	R04405,R09365	RC00035,RC00113,RC01241	ko00000,ko00001,ko00002,ko01000	-	-	-	Meth_synt_1,Meth_synt_2
Gene.42443::LRWT_f5p0_2687_transcript17606_g2::g.42443::m.42443	218851.Aquca_004_00598.1	1.07e-261	736.0	COG0620@1|root,KOG2263@2759|Eukaryota,37MWV@33090|Viridiplantae,3G84Z@35493|Streptophyta	35493|Streptophyta	E	5-methyltetrahydropteroyltriglutamate-- homocysteine	-	GO:0000096,GO:0000097,GO:0003674,GO:0003824,GO:0003871,GO:0005575,GO:0005576,GO:0005622,GO:0005623,GO:0005737,GO:0005829,GO:0006082,GO:0006520,GO:0006555,GO:0006790,GO:0006807,GO:0008150,GO:0008152,GO:0008168,GO:0008172,GO:0008652,GO:0008705,GO:0009058,GO:0009066,GO:0009067,GO:0009086,GO:0009987,GO:0016053,GO:0016740,GO:0016741,GO:0019752,GO:0032259,GO:0042084,GO:0042085,GO:0043436,GO:0044237,GO:…	2.1.1.14	ko:K00549	ko00270,ko00450,ko01100,ko01110,ko01230,map00270,map00450,map01100,map01110,map01230	M00017	R04405,R09365	RC00035,RC00113,RC01241	ko00000,ko00001,ko00002,ko01000	-	-	-	Meth_synt_1,Meth_synt_2
Gene.29562::LRWT_f102p0_2801_transcript11350_g1::g.29562::m.29562	218851.Aquca_016_00279.1	0.0	1169.0	KOG0401@1|root,KOG0401@2759|Eukaryota,37J2C@33090|Viridiplantae,3G9XZ@35493|Streptophyta	35493|Streptophyta	J	eukaryotic translation initiation factor isoform	-	-	-	ko:K03260	ko03013,ko05416,map03013,map05416	M00428	-	-	ko00000,ko00001,ko00002,ko03012,ko03019	-	-	-	MA3,MIF4G
Gene.100832::LRWT_f5p0_1253_transcript53045_g1::g.100832::m.100832	218851.Aquca_008_00134.1	2.62e-179	507.0	28JWX@1|root,2QSB5@2759|Eukaryota,37R9C@33090|Viridiplantae,3GDHB@35493|Streptophyta	35493|Streptophyta	C	Belongs to the alternative oxidase family	-	GO:0005575,GO:0005622,GO:0005623,GO:0005737,GO:0005739,GO:0043226,GO:0043227,GO:0043229,GO:0043231,GO:0044424,GO:0044444,GO:0044464	1.10.3.11	ko:K17893	-	-	R09504	RC00061	ko00000,ko01000	-	-	-	AOX
Gene.79254::LRWT_f5p0_1710_transcript38715_g3::g.79254::m.79254	218851.Aquca_100_00023.1	2.69e-217	606.0	KOG0767@1|root,KOG0767@2759|Eukaryota,37P9E@33090|Viridiplantae,3GEGJ@35493|Streptophyta	35493|Streptophyta	C	Belongs to the mitochondrial carrier (TC 2.A.29) family	-	-	-	ko:K15102	-	-	-	-	ko00000,ko02000,ko04147	2.A.29.4	-	-	Mito_carr
Gene.127984::LRWT_f4p0_822_transcript73932_g4::g.127984::m.127984	218851.Aquca_026_00253.1	1.17e-69	219.0	29F1T@1|root,2RN75@2759|Eukaryota,37TJB@33090|Viridiplantae	33090|Viridiplantae	S	MLP-like protein	-	-	-	-	-	-	-	-	-	-	-	-	Bet_v_1
Gene.39136::LRWT_f15p0_2757_transcript15927_g1::g.39136::m.39136	218851.Aquca_009_00780.1	0.0	1379.0	KOG2232@1|root,KOG2232@2759|Eukaryota,37MRB@33090|Viridiplantae,3GDA1@35493|Streptophyta	35493|Streptophyta	T	Neutral ceramidase-like	-	GO:0005575,GO:0005622,GO:0005623,GO:0005737,GO:0005773,GO:0005774,GO:0005783,GO:0005794,GO:0006950,GO:0006979,GO:0008150,GO:0009987,GO:0012505,GO:0016020,GO:0019725,GO:0031090,GO:0033554,GO:0034599,GO:0042221,GO:0042592,GO:0043226,GO:0043227,GO:0043229,GO:0043231,GO:0044422,GO:0044424,GO:0044437,GO:0044444,GO:0044446,GO:0044464,GO:0048878,GO:0050896,GO:0051716,GO:0055082,GO:0055088,GO:0065007,GO:…	3.5.1.23	ko:K12349	ko00600,ko01100,ko04071,map00600,map01100,map04071	M00099	R01494	RC00064,RC00328	ko00000,ko00001,ko00002,ko01000	-	-	-	Ceramidase_alk,Ceramidse_alk_C
Gene.84070::LRWT_f36p0_1593_transcript41745_g1::g.84070::m.84070	4530.OS06T0681400-01	0.0	888.0	COG5272@1|root,KOG0001@2759|Eukaryota,37K87@33090|Viridiplantae,3G7XW@35493|Streptophyta,3KW11@4447|Liliopsida,3IEYZ@38820|Poales	35493|Streptophyta	O	protein Sb04g004280 source	-	-	-	ko:K08770	ko03320,map03320	-	-	-	ko00000,ko00001,ko04121	-	-	-	ubiquitin
Gene.70856::LRWT_f3p0_1889_transcript33570_g4::g.70856::m.70856	4432.XP_010244170.1	1.34e-221	618.0	KOG4287@1|root,KOG4287@2759|Eukaryota,37IZG@33090|Viridiplantae,3GDMD@35493|Streptophyta	35493|Streptophyta	M	Hydrolyzes acetyl esters in homogalacturonan regions of pectin. In type I primary cell wall, galacturonic acid residues of pectin can be acetylated at the O-2 and O-3 positions. Decreasing the degree of acetylation of pectin gels in vitro alters their physical properties	-	GO:0003674,GO:0003824,GO:0005575,GO:0005618,GO:0005623,GO:0008150,GO:0009505,GO:0009987,GO:0016043,GO:0016787,GO:0016788,GO:0030312,GO:0044464,GO:0045229,GO:0052689,GO:0052793,GO:0071554,GO:0071555,GO:0071840,GO:0071944	3.1.1.98	ko:K19882	ko04310,map04310	-	R11202	RC00020,RC00041	ko00000,ko00001,ko01000	-	-	-	PAE
Gene.68816::LRWT_f3p0_1918_transcript32325_g1::g.68816::m.68816	218851.Aquca_007_00732.1	9.18e-245	683.0	COG4870@1|root,KOG4296@1|root,KOG1543@2759|Eukaryota,KOG4296@2759|Eukaryota,37S7C@33090|Viridiplantae,3G8BZ@35493|Streptophyta	35493|Streptophyta	O	Belongs to the peptidase C1 family	-	GO:0000323,GO:0000932,GO:0003674,GO:0003824,GO:0004175,GO:0004197,GO:0005575,GO:0005576,GO:0005615,GO:0005622,GO:0005623,GO:0005737,GO:0005764,GO:0005773,GO:0005911,GO:0006508,GO:0006807,GO:0006950,GO:0006952,GO:0008150,GO:0008152,GO:0008233,GO:0008234,GO:0009056,GO:0009057,GO:0009506,GO:0009507,GO:0009536,GO:0009605,GO:0009607,GO:0009620,GO:0009987,GO:0010494,GO:0016787,GO:0019538,GO:0030054,GO:…	-	-	-	-	-	-	-	-	-	-	Granulin,Inhibitor_I29,Peptidase_C1
Gene.44775::LRWT_f2p0_2610_transcript18815_g4::g.44775::m.44775	218851.Aquca_030_00132.1	0.0	1248.0	COG2986@1|root,KOG0222@2759|Eukaryota,37M4G@33090|Viridiplantae,3G9T5@35493|Streptophyta	35493|Streptophyta	Q	Phenylalanine ammonialyase	PAL	GO:0001101,GO:0003674,GO:0003824,GO:0006464,GO:0006508,GO:0006511,GO:0006725,GO:0006807,GO:0008150,GO:0008152,GO:0009056,GO:0009057,GO:0009058,GO:0009636,GO:0009698,GO:0009699,GO:0009719,GO:0009725,GO:0009739,GO:0009987,GO:0010033,GO:0010243,GO:0014070,GO:0016598,GO:0016829,GO:0016840,GO:0016841,GO:0019438,GO:0019538,GO:0019748,GO:0019941,GO:0030163,GO:0033993,GO:0036211,GO:0042221,GO:0042493,GO:…	4.3.1.24,4.3.1.25	ko:K10775,ko:K13064	ko00360,ko00940,ko01100,ko01110,map00360,map00940,map01100,map01110	M00039,M00137,M00350	R00697,R00737	RC00361	ko00000,ko00001,ko00002,ko01000	-	-	-	Lyase_aromatic
Gene.48559::LRWT_f3p0_2471_transcript20813_g1::g.48559::m.48559	218851.Aquca_087_00007.1	0.0	1246.0	COG2986@1|root,KOG0222@2759|Eukaryota,37M4G@33090|Viridiplantae,3G9T5@35493|Streptophyta	35493|Streptophyta	Q	Phenylalanine ammonialyase	PAL	GO:0001101,GO:0003674,GO:0003824,GO:0006464,GO:0006508,GO:0006511,GO:0006725,GO:0006807,GO:0008150,GO:0008152,GO:0009056,GO:0009057,GO:0009058,GO:0009636,GO:0009698,GO:0009699,GO:0009719,GO:0009725,GO:0009739,GO:0009987,GO:0010033,GO:0010243,GO:0014070,GO:0016598,GO:0016829,GO:0016840,GO:0016841,GO:0019438,GO:0019538,GO:0019748,GO:0019941,GO:0030163,GO:0033993,GO:0036211,GO:0042221,GO:0042493,GO:…	4.3.1.24,4.3.1.25	ko:K10775,ko:K13064	ko00360,ko00940,ko01100,ko01110,map00360,map00940,map01100,map01110	M00039,M00137,M00350	R00697,R00737	RC00361	ko00000,ko00001,ko00002,ko01000	-	-	-	Lyase_aromatic
Gene.65048::LRWT_f8p0_1976_transcript30079_g1::g.65048::m.65048	218851.Aquca_003_00253.1	5.4e-314	868.0	28NRM@1|root,2QVBP@2759|Eukaryota,37QAQ@33090|Viridiplantae,3GD2R@35493|Streptophyta	35493|Streptophyta	S	polyphenol oxidase	-	GO:0005575,GO:0005622,GO:0005623,GO:0005737,GO:0009507,GO:0009534,GO:0009536,GO:0009543,GO:0009579,GO:0031976,GO:0031977,GO:0031978,GO:0031984,GO:0043226,GO:0043227,GO:0043229,GO:0043231,GO:0044422,GO:0044424,GO:0044434,GO:0044435,GO:0044436,GO:0044444,GO:0044446,GO:0044464	1.10.3.1	ko:K00422	ko00350,ko00950,ko01100,ko01110,map00350,map00950,map01100,map01110	-	R00031,R00045,R02078	RC00046,RC00180	ko00000,ko00001,ko01000	-	-	-	PPO1_DWL,PPO1_KFDV,Tyrosinase
Gene.106474::LRWT_f3p0_1219_transcript57054_g8::g.106474::m.106474	4432.XP_010243708.1	8.88e-217	598.0	COG1310@1|root,KOG1555@2759|Eukaryota,37PAP@33090|Viridiplantae,3GCWP@35493|Streptophyta	35493|Streptophyta	O	26S proteasome non-ATPase regulatory subunit	-	-	-	ko:K03030	ko03050,ko05169,map03050,map05169	M00341	-	-	ko00000,ko00001,ko00002,ko01002,ko03051,ko04121	-	-	-	JAB,MitMem_reg
Gene.26226::LRWT_f2p0_3131_transcript9817_g1::g.26226::m.26226	218851.Aquca_013_00116.1	2.97e-173	499.0	COG0119@1|root,KOG2367@2759|Eukaryota,37PTT@33090|Viridiplantae,3GAF3@35493|Streptophyta	35493|Streptophyta	E	Belongs to the alpha-IPM synthase homocitrate synthase family	-	GO:0003674,GO:0003824,GO:0003852,GO:0005575,GO:0005622,GO:0005623,GO:0005737,GO:0006082,GO:0006520,GO:0006551,GO:0006807,GO:0008150,GO:0008152,GO:0008652,GO:0009058,GO:0009081,GO:0009082,GO:0009098,GO:0009507,GO:0009526,GO:0009532,GO:0009536,GO:0009570,GO:0009941,GO:0009987,GO:0016053,GO:0016740,GO:0016746,GO:0019752,GO:0031967,GO:0031975,GO:0043226,GO:0043227,GO:0043229,GO:0043231,GO:0043436,GO:…	2.3.3.13	ko:K01649	ko00290,ko00620,ko01100,ko01110,ko01210,ko01230,map00290,map00620,map01100,map01110,map01210,map01230	M00432	R01213	RC00004,RC00470,RC02754	br01601,ko00000,ko00001,ko00002,ko01000	-	-	-	HMGL-like,LeuA_dimer
Gene.26225::LRWT_f2p0_3131_transcript9817_g1::g.26225::m.26225	218851.Aquca_013_00116.1	6.77e-153	449.0	COG0119@1|root,KOG2367@2759|Eukaryota,37PTT@33090|Viridiplantae,3GAF3@35493|Streptophyta	35493|Streptophyta	E	Belongs to the alpha-IPM synthase homocitrate synthase family	-	GO:0003674,GO:0003824,GO:0003852,GO:0005575,GO:0005622,GO:0005623,GO:0005737,GO:0006082,GO:0006520,GO:0006551,GO:0006807,GO:0008150,GO:0008152,GO:0008652,GO:0009058,GO:0009081,GO:0009082,GO:0009098,GO:0009507,GO:0009526,GO:0009532,GO:0009536,GO:0009570,GO:0009941,GO:0009987,GO:0016053,GO:0016740,GO:0016746,GO:0019752,GO:0031967,GO:0031975,GO:0043226,GO:0043227,GO:0043229,GO:0043231,GO:0043436,GO:…	2.3.3.13	ko:K01649	ko00290,ko00620,ko01100,ko01110,ko01210,ko01230,map00290,map00620,map01100,map01110,map01210,map01230	M00432	R01213	RC00004,RC00470,RC02754	br01601,ko00000,ko00001,ko00002,ko01000	-	-	-	HMGL-like,LeuA_dimer
Gene.83666::LRWT_f56p0_1524_transcript41491_g1::g.83666::m.83666	218851.Aquca_047_00032.1	9.87e-241	672.0	COG0169@1|root,KOG0692@2759|Eukaryota,37S9N@33090|Viridiplantae,3GFW7@35493|Streptophyta	35493|Streptophyta	E	3-dehydroquinate synthase	-	GO:0003674,GO:0003824,GO:0003856,GO:0005575,GO:0005622,GO:0005623,GO:0005737,GO:0005768,GO:0005794,GO:0005802,GO:0006082,GO:0008150,GO:0008152,GO:0009058,GO:0009507,GO:0009532,GO:0009536,GO:0009570,GO:0009987,GO:0012505,GO:0016053,GO:0016829,GO:0016835,GO:0016838,GO:0019632,GO:0019752,GO:0031410,GO:0031982,GO:0031984,GO:0032787,GO:0033587,GO:0043226,GO:0043227,GO:0043229,GO:0043231,GO:0043436,GO:…	4.2.3.4	ko:K01735	ko00400,ko01100,ko01110,ko01130,ko01230,map00400,map01100,map01110,map01130,map01230	M00022	R03083	RC00847	ko00000,ko00001,ko00002,ko01000	-	-	-	DHQ_synthase
Gene.71881::LRWT_f14p0_1847_transcript34187_g1::g.71881::m.71881	218851.Aquca_034_00223.1	1.41e-284	784.0	COG0183@1|root,KOG1389@2759|Eukaryota,37NKG@33090|Viridiplantae,3GB8R@35493|Streptophyta	35493|Streptophyta	I	Belongs to the thiolase family	-	GO:0003674,GO:0003824,GO:0003988,GO:0005575,GO:0005622,GO:0005623,GO:0005634,GO:0005730,GO:0005737,GO:0005739,GO:0005773,GO:0005774,GO:0005777,GO:0006082,GO:0006629,GO:0006631,GO:0006635,GO:0006950,GO:0006996,GO:0007031,GO:0008150,GO:0008152,GO:0009056,GO:0009058,GO:0009062,GO:0009507,GO:0009514,GO:0009536,GO:0009611,GO:0009657,GO:0009694,GO:0009695,GO:0009787,GO:0009789,GO:0009966,GO:0009967,GO:…	2.3.1.16	ko:K07513	ko00071,ko00280,ko00592,ko01040,ko01100,ko01110,ko01130,ko01212,ko03320,ko04146,map00071,map00280,map00592,map01040,map01100,map01110,map01130,map01212,map03320,map04146	M00087,M00113	R00927,R01177,R03778,R03858,R03991,R04546,R04742,R04747,R07891,R07895,R07899,R07937,R07953	RC00004,RC00326,RC00405,RC01702,RC02728	ko00000,ko00001,ko00002,ko01000	-	-	-	Thiolase_C,Thiolase_N
Gene.70682::LRWT_f125p0_1732_transcript33460_g1::g.70682::m.70682	218851.Aquca_034_00223.1	6.26e-292	801.0	COG0183@1|root,KOG1389@2759|Eukaryota,37NKG@33090|Viridiplantae,3GB8R@35493|Streptophyta	35493|Streptophyta	I	Belongs to the thiolase family	-	GO:0003674,GO:0003824,GO:0003988,GO:0005575,GO:0005622,GO:0005623,GO:0005634,GO:0005730,GO:0005737,GO:0005739,GO:0005773,GO:0005774,GO:0005777,GO:0006082,GO:0006629,GO:0006631,GO:0006635,GO:0006950,GO:0006996,GO:0007031,GO:0008150,GO:0008152,GO:0009056,GO:0009058,GO:0009062,GO:0009507,GO:0009514,GO:0009536,GO:0009611,GO:0009657,GO:0009694,GO:0009695,GO:0009787,GO:0009789,GO:0009966,GO:0009967,GO:…	2.3.1.16	ko:K07513	ko00071,ko00280,ko00592,ko01040,ko01100,ko01110,ko01130,ko01212,ko03320,ko04146,map00071,map00280,map00592,map01040,map01100,map01110,map01130,map01212,map03320,map04146	M00087,M00113	R00927,R01177,R03778,R03858,R03991,R04546,R04742,R04747,R07891,R07895,R07899,R07937,R07953	RC00004,RC00326,RC00405,RC01702,RC02728	ko00000,ko00001,ko00002,ko01000	-	-	-	Thiolase_C,Thiolase_N
Gene.93481::LRWT_f4p0_1442_transcript47897_g2::g.93481::m.93481	218851.Aquca_042_00071.1	1.27e-238	661.0	28KAQ@1|root,2QSRH@2759|Eukaryota,37N2A@33090|Viridiplantae,3G76Z@35493|Streptophyta	35493|Streptophyta	S	3-oxo-Delta(4,5)-steroid 5-beta-reductase-like	-	GO:0003002,GO:0003674,GO:0003824,GO:0005575,GO:0005622,GO:0005623,GO:0005737,GO:0005829,GO:0006629,GO:0006950,GO:0007275,GO:0007389,GO:0008150,GO:0008152,GO:0008202,GO:0009611,GO:0010051,GO:0016491,GO:0016627,GO:0016628,GO:0032501,GO:0032502,GO:0035671,GO:0044238,GO:0044424,GO:0044444,GO:0044464,GO:0048856,GO:0050896,GO:0055114,GO:0071704,GO:1901360	1.3.1.3	ko:K22419	-	-	-	-	ko00000,ko01000	-	-	-	Epimerase
Gene.65717::LRWT_f18p0_1962_transcript30474_g1::g.65717::m.65717	218851.Aquca_013_00642.1	0.0	873.0	COG0169@1|root,KOG0692@2759|Eukaryota,37S9P@33090|Viridiplantae,3GGZF@35493|Streptophyta	35493|Streptophyta	E	Belongs to the EPSP synthase family	-	GO:0003674,GO:0003824,GO:0003866,GO:0005575,GO:0005622,GO:0005623,GO:0005737,GO:0006082,GO:0008150,GO:0008152,GO:0009058,GO:0009423,GO:0009507,GO:0009532,GO:0009536,GO:0009570,GO:0009987,GO:0016053,GO:0016740,GO:0016765,GO:0019752,GO:0043226,GO:0043227,GO:0043229,GO:0043231,GO:0043436,GO:0043648,GO:0043650,GO:0044237,GO:0044249,GO:0044281,GO:0044283,GO:0044422,GO:0044424,GO:0044434,GO:0044435,GO:…	2.5.1.19	ko:K00800	ko00400,ko01100,ko01110,ko01130,ko01230,map00400,map01100,map01110,map01130,map01230	M00022	R03460	RC00350	ko00000,ko00001,ko00002,ko01000	-	-	-	EPSP_synthase
Gene.40875::LRWT_f3p0_2741_transcript16799_g1::g.40875::m.40875	218851.Aquca_004_00598.1	4.7e-246	696.0	COG0620@1|root,KOG2263@2759|Eukaryota,37MWV@33090|Viridiplantae,3G84Z@35493|Streptophyta	35493|Streptophyta	E	5-methyltetrahydropteroyltriglutamate-- homocysteine	-	GO:0000096,GO:0000097,GO:0003674,GO:0003824,GO:0003871,GO:0005575,GO:0005576,GO:0005622,GO:0005623,GO:0005737,GO:0005829,GO:0006082,GO:0006520,GO:0006555,GO:0006790,GO:0006807,GO:0008150,GO:0008152,GO:0008168,GO:0008172,GO:0008652,GO:0008705,GO:0009058,GO:0009066,GO:0009067,GO:0009086,GO:0009987,GO:0016053,GO:0016740,GO:0016741,GO:0019752,GO:0032259,GO:0042084,GO:0042085,GO:0043436,GO:0044237,GO:…	2.1.1.14	ko:K00549	ko00270,ko00450,ko01100,ko01110,ko01230,map00270,map00450,map01100,map01110,map01230	M00017	R04405,R09365	RC00035,RC00113,RC01241	ko00000,ko00001,ko00002,ko01000	-	-	-	Meth_synt_1,Meth_synt_2
Gene.40876::LRWT_f3p0_2741_transcript16799_g1::g.40876::m.40876	218851.Aquca_004_00598.1	1.56e-223	634.0	COG0620@1|root,KOG2263@2759|Eukaryota,37MWV@33090|Viridiplantae,3G84Z@35493|Streptophyta	35493|Streptophyta	E	5-methyltetrahydropteroyltriglutamate-- homocysteine	-	GO:0000096,GO:0000097,GO:0003674,GO:0003824,GO:0003871,GO:0005575,GO:0005576,GO:0005622,GO:0005623,GO:0005737,GO:0005829,GO:0006082,GO:0006520,GO:0006555,GO:0006790,GO:0006807,GO:0008150,GO:0008152,GO:0008168,GO:0008172,GO:0008652,GO:0008705,GO:0009058,GO:0009066,GO:0009067,GO:0009086,GO:0009987,GO:0016053,GO:0016740,GO:0016741,GO:0019752,GO:0032259,GO:0042084,GO:0042085,GO:0043436,GO:0044237,GO:…	2.1.1.14	ko:K00549	ko00270,ko00450,ko01100,ko01110,ko01230,map00270,map00450,map01100,map01110,map01230	M00017	R04405,R09365	RC00035,RC00113,RC01241	ko00000,ko00001,ko00002,ko01000	-	-	-	Meth_synt_1,Meth_synt_2
Gene.130320::LRWT_f2p0_799_transcript75977_g19::g.130320::m.130320	28532.XP_010548975.1	9.83e-79	238.0	COG2147@1|root,KOG1696@2759|Eukaryota,37M2R@33090|Viridiplantae,3GC4Q@35493|Streptophyta,3HVV5@3699|Brassicales	35493|Streptophyta	J	ribosomal protein	-	GO:0003674,GO:0003676,GO:0003723,GO:0003729,GO:0003735,GO:0005198,GO:0005488,GO:0005575,GO:0005622,GO:0005623,GO:0005737,GO:0005829,GO:0005840,GO:0005886,GO:0006412,GO:0006518,GO:0006807,GO:0008150,GO:0008152,GO:0009058,GO:0009059,GO:0009987,GO:0010467,GO:0015934,GO:0016020,GO:0019538,GO:0022625,GO:0022626,GO:0032991,GO:0034641,GO:0034645,GO:0043043,GO:0043170,GO:0043226,GO:0043228,GO:0043229,GO:…	-	ko:K02885	ko03010,map03010	M00177,M00179	-	-	br01610,ko00000,ko00001,ko00002,ko03011	-	-	-	Ribosomal_L19e
Gene.114670::LRWT_f16p0_1010_transcript63129_g1::g.114670::m.114670	29760.VIT_19s0014g04760.t01	1.68e-185	516.0	COG0090@1|root,KOG2309@2759|Eukaryota,37IFW@33090|Viridiplantae,3GBRR@35493|Streptophyta	35493|Streptophyta	J	60s ribosomal protein	-	GO:0002181,GO:0003674,GO:0003676,GO:0003723,GO:0003735,GO:0005198,GO:0005488,GO:0005575,GO:0005622,GO:0005623,GO:0005737,GO:0005829,GO:0005840,GO:0006412,GO:0006518,GO:0006807,GO:0008150,GO:0008152,GO:0009058,GO:0009059,GO:0009987,GO:0010467,GO:0015934,GO:0019538,GO:0022625,GO:0022626,GO:0032991,GO:0034641,GO:0034645,GO:0043043,GO:0043170,GO:0043226,GO:0043228,GO:0043229,GO:0043232,GO:0043603,GO:…	-	ko:K02938	ko03010,map03010	M00177	-	-	br01610,ko00000,ko00001,ko00002,ko03011	-	-	-	Ribosomal_L2,Ribosomal_L2_C
Gene.76925::LRWT_f2p0_1754_transcript37257_g6::g.76925::m.76925	3750.XP_008380382.1	3.95e-309	843.0	KOG1435@1|root,KOG1435@2759|Eukaryota,37JPF@33090|Viridiplantae,3GETN@35493|Streptophyta,4JF7Y@91835|fabids	35493|Streptophyta	IT	7-dehydrocholesterol reductase	-	GO:0003674,GO:0003824,GO:0005575,GO:0005622,GO:0005623,GO:0005737,GO:0005783,GO:0005789,GO:0005794,GO:0005886,GO:0006629,GO:0006694,GO:0008150,GO:0008152,GO:0008202,GO:0008610,GO:0009058,GO:0009918,GO:0010817,GO:0012505,GO:0016020,GO:0016128,GO:0016129,GO:0016131,GO:0016132,GO:0016491,GO:0016627,GO:0031984,GO:0042175,GO:0042445,GO:0042446,GO:0043226,GO:0043227,GO:0043229,GO:0043231,GO:0044238,GO:…	1.3.1.21	ko:K00213	ko00100,ko01100,ko01110,map00100,map01100,map01110	M00101	R01451,R01456,R07487,R07492	RC00138	ko00000,ko00001,ko00002,ko01000	-	-	-	ERG4_ERG24
Gene.80364::LRWT_f5p0_1685_transcript39409_g5::g.80364::m.80364	218851.Aquca_012_00022.1	4.2e-178	514.0	KOG1192@1|root,KOG1192@2759|Eukaryota,37ZC2@33090|Viridiplantae	33090|Viridiplantae	CG	UDP-glucoronosyl and UDP-glucosyl transferase	-	-	2.4.1.324	ko:K21374	-	-	-	-	ko00000,ko01000,ko01003	-	GT1	-	UDPGT
Gene.88280::LRWT_f20p0_1528_transcript44416_g1::g.88280::m.88280	218851.Aquca_012_00022.1	5.4e-180	519.0	KOG1192@1|root,KOG1192@2759|Eukaryota,37ZC2@33090|Viridiplantae	33090|Viridiplantae	CG	UDP-glucoronosyl and UDP-glucosyl transferase	-	-	2.4.1.324	ko:K21374	-	-	-	-	ko00000,ko01000,ko01003	-	GT1	-	UDPGT
Gene.24941::LRWT_f4p0_3335_transcript9249_g1::g.24941::m.24941	218851.Aquca_010_00147.1	0.0	941.0	COG1131@1|root,KOG0061@2759|Eukaryota,37IF3@33090|Viridiplantae,3G8G0@35493|Streptophyta	35493|Streptophyta	Q	ABC transporter G family member	-	GO:0000003,GO:0001101,GO:0003002,GO:0003006,GO:0003674,GO:0003824,GO:0005215,GO:0005319,GO:0005342,GO:0005488,GO:0005515,GO:0005575,GO:0005623,GO:0005886,GO:0006810,GO:0006811,GO:0006820,GO:0006869,GO:0006950,GO:0006970,GO:0007275,GO:0007389,GO:0008028,GO:0008150,GO:0008509,GO:0008514,GO:0009611,GO:0009628,GO:0009651,GO:0009653,GO:0009719,GO:0009725,GO:0009737,GO:0009790,GO:0009791,GO:0009793,GO:…	-	-	-	-	-	-	-	-	-	-	ABC2_membrane,ABC_tran
Gene.124645::LRWT_f14p0_847_transcript71066_g2::g.124645::m.124645	218851.Aquca_020_00387.1	2.83e-89	271.0	2C7MT@1|root,2QS0C@2759|Eukaryota,37NF9@33090|Viridiplantae,3GBAJ@35493|Streptophyta	35493|Streptophyta	S	acid phosphatase	-	-	-	-	-	-	-	-	-	-	-	-	Acid_phosphat_B
Gene.114760::LRWT_f12p0_999_transcript63199_g1::g.114760::m.114760	29730.Gorai.008G272000.1	1.67e-152	435.0	KOG4701@1|root,KOG4701@2759|Eukaryota,37RVY@33090|Viridiplantae,3GAEK@35493|Streptophyta	35493|Streptophyta	G	Belongs to the glycosyl hydrolase 18 family	-	GO:0005575,GO:0005622,GO:0005623,GO:0005737,GO:0005773,GO:0043226,GO:0043227,GO:0043229,GO:0043231,GO:0044424,GO:0044444,GO:0044464	3.2.1.14	ko:K01183	ko00520,ko01100,map00520,map01100	-	R01206,R02334	RC00467	ko00000,ko00001,ko01000	-	GH18	-	Glyco_hydro_18
Gene.18619::LRWT_f2p0_3570_transcript6556_g1::g.18619::m.18619	218851.Aquca_005_00057.1	2.9e-200	587.0	COG1048@1|root,KOG0452@2759|Eukaryota,37K7C@33090|Viridiplantae,3GEVR@35493|Streptophyta	35493|Streptophyta	AJ	Catalyzes the isomerization of citrate to isocitrate via cis-aconitate	-	-	4.2.1.3	ko:K01681	ko00020,ko00630,ko00720,ko01100,ko01110,ko01120,ko01130,ko01200,ko01210,ko01230,map00020,map00630,map00720,map01100,map01110,map01120,map01130,map01200,map01210,map01230	M00009,M00010,M00012,M00173,M00740	R01324,R01325,R01900	RC00497,RC00498,RC00618	br01601,ko00000,ko00001,ko00002,ko01000	-	-	-	Aconitase,Aconitase_C
Gene.18618::LRWT_f2p0_3570_transcript6556_g1::g.18618::m.18618	218851.Aquca_005_00057.1	0.0	1060.0	COG1048@1|root,KOG0452@2759|Eukaryota,37K7C@33090|Viridiplantae,3GEVR@35493|Streptophyta	35493|Streptophyta	AJ	Catalyzes the isomerization of citrate to isocitrate via cis-aconitate	-	-	4.2.1.3	ko:K01681	ko00020,ko00630,ko00720,ko01100,ko01110,ko01120,ko01130,ko01200,ko01210,ko01230,map00020,map00630,map00720,map01100,map01110,map01120,map01130,map01200,map01210,map01230	M00009,M00010,M00012,M00173,M00740	R01324,R01325,R01900	RC00497,RC00498,RC00618	br01601,ko00000,ko00001,ko00002,ko01000	-	-	-	Aconitase,Aconitase_C
Gene.134798::LRWT_f2p0_700_transcript80012_g14::g.134798::m.134798	218851.Aquca_027_00141.1	9.72e-63	202.0	COG0563@1|root,KOG3078@2759|Eukaryota,37MJV@33090|Viridiplantae,3G8FR@35493|Streptophyta	35493|Streptophyta	F	Belongs to the adenylate kinase family	ADK	GO:0003674,GO:0003824,GO:0004017,GO:0005575,GO:0005622,GO:0005623,GO:0005634,GO:0005737,GO:0006082,GO:0006139,GO:0006520,GO:0006725,GO:0006753,GO:0006793,GO:0006796,GO:0006807,GO:0007275,GO:0008150,GO:0008152,GO:0008652,GO:0009058,GO:0009117,GO:0009123,GO:0009165,GO:0009507,GO:0009532,GO:0009536,GO:0009570,GO:0009987,GO:0016053,GO:0016301,GO:0016310,GO:0016740,GO:0016772,GO:0016776,GO:0018130,GO:…	2.7.4.3	ko:K00939	ko00230,ko00730,ko01100,ko01110,ko01130,map00230,map00730,map01100,map01110,map01130	M00049	R00127,R01547,R11319	RC00002	ko00000,ko00001,ko00002,ko01000,ko04147	-	-	-	ADK
Gene.72311::LRWT_f16p0_1813_transcript34443_g1::g.72311::m.72311	218851.Aquca_001_00518.1	4.99e-313	858.0	COG1012@1|root,KOG2450@2759|Eukaryota,37Q0A@33090|Viridiplantae,3GBC3@35493|Streptophyta	35493|Streptophyta	C	Belongs to the aldehyde dehydrogenase family	-	GO:0003674,GO:0003824,GO:0004029,GO:0004030,GO:0006725,GO:0008150,GO:0008152,GO:0009058,GO:0009698,GO:0009699,GO:0009987,GO:0016491,GO:0016620,GO:0016903,GO:0019438,GO:0019748,GO:0044237,GO:0044249,GO:0044550,GO:0050269,GO:0055114,GO:0071704,GO:1901360,GO:1901362,GO:1901576	1.2.1.3,1.2.1.68	ko:K00128,ko:K12355	ko00010,ko00053,ko00071,ko00280,ko00310,ko00330,ko00340,ko00380,ko00410,ko00561,ko00620,ko00625,ko00903,ko00940,ko00981,ko01100,ko01110,ko01120,ko01130,map00010,map00053,map00071,map00280,map00310,map00330,map00340,map00380,map00410,map00561,map00620,map00625,map00903,map00940,map00981,map01100,map01110,map01120,map01130	M00135	R00264,R00631,R00710,R00904,R01752,R01986,R02549,R02678,R02940,R02957,R03283,R03869,R04065,R04506,R04903,R05050,R05237,R05238,R05286,R05700,R05701,R06366,R07441,R07442,R08146	RC00047,RC00071,RC00080,RC00186,RC00218,RC00242,RC00816,RC01500	ko00000,ko00001,ko00002,ko01000	-	-	-	Aldedh
Gene.34585::LRWT_f3p0_2973_transcript13704_g1::g.34585::m.34585	218851.Aquca_020_00414.1	0.0	1539.0	COG0308@1|root,KOG1046@2759|Eukaryota,37KDN@33090|Viridiplantae,3GF9G@35493|Streptophyta	35493|Streptophyta	O	aminopeptidase	-	GO:0001666,GO:0003674,GO:0003824,GO:0004177,GO:0005488,GO:0005575,GO:0005622,GO:0005623,GO:0005737,GO:0005829,GO:0005886,GO:0006508,GO:0006518,GO:0006807,GO:0006810,GO:0006950,GO:0008144,GO:0008150,GO:0008152,GO:0008233,GO:0008235,GO:0008237,GO:0008238,GO:0008270,GO:0009056,GO:0009628,GO:0009914,GO:0009926,GO:0009987,GO:0010013,GO:0010817,GO:0016020,GO:0016787,GO:0019538,GO:0031090,GO:0031406,GO:…	-	ko:K08776	-	-	-	-	ko00000,ko01000,ko01002	-	-	-	ERAP1_C,Peptidase_M1
Gene.53462::LRWT_f4p0_2279_transcript23471_g1::g.53462::m.53462	218851.Aquca_044_00133.1	0.0	1005.0	COG0147@1|root,KOG1223@2759|Eukaryota,37PW6@33090|Viridiplantae,3G7PU@35493|Streptophyta	35493|Streptophyta	E	Anthranilate synthase	-	GO:0000162,GO:0003674,GO:0003824,GO:0004049,GO:0005575,GO:0005622,GO:0005623,GO:0005737,GO:0005950,GO:0006082,GO:0006520,GO:0006568,GO:0006576,GO:0006586,GO:0006725,GO:0006807,GO:0008150,GO:0008152,GO:0008652,GO:0009058,GO:0009072,GO:0009073,GO:0009308,GO:0009309,GO:0009507,GO:0009536,GO:0009987,GO:0016053,GO:0016829,GO:0016830,GO:0016833,GO:0018130,GO:0019438,GO:0019752,GO:0032991,GO:0034641,GO:…	4.1.3.27	ko:K01657	ko00400,ko00405,ko01100,ko01110,ko01130,ko01230,ko02024,ko02025,map00400,map00405,map01100,map01110,map01130,map01230,map02024,map02025	M00023	R00985,R00986	RC00010,RC02148,RC02414	ko00000,ko00001,ko00002,ko01000	-	-	-	Anth_synt_I_N,Chorismate_bind
Gene.107368::LRWT_f21p0_1134_transcript57716_g1::g.107368::m.107368	218851.Aquca_002_01313.1	1.79e-148	423.0	COG0512@1|root,KOG0026@2759|Eukaryota,37MQH@33090|Viridiplantae,3GGR3@35493|Streptophyta	35493|Streptophyta	E	Anthranilate synthase	ASB2	GO:0000162,GO:0003674,GO:0003824,GO:0004049,GO:0005575,GO:0005622,GO:0005623,GO:0005737,GO:0005950,GO:0006082,GO:0006520,GO:0006568,GO:0006576,GO:0006586,GO:0006725,GO:0006807,GO:0008150,GO:0008152,GO:0008652,GO:0009058,GO:0009072,GO:0009073,GO:0009308,GO:0009309,GO:0009889,GO:0009987,GO:0010600,GO:0010817,GO:0016053,GO:0016829,GO:0016830,GO:0016833,GO:0018130,GO:0019222,GO:0019438,GO:0019752,GO:…	4.1.3.27	ko:K01658	ko00400,ko00405,ko01100,ko01110,ko01130,ko01230,ko02024,ko02025,map00400,map00405,map01100,map01110,map01130,map01230,map02024,map02025	M00023	R00985,R00986	RC00010,RC02148,RC02414	ko00000,ko00001,ko00002,ko01000	-	-	-	GATase
Gene.35136::LRWT_f5p0_2943_transcript13964_g1::g.35136::m.35136	218851.Aquca_007_00366.1	0.0	1090.0	COG1166@1|root,2QTXD@2759|Eukaryota,37QVP@33090|Viridiplantae,3GFD1@35493|Streptophyta	35493|Streptophyta	H	Belongs to the Orn Lys Arg decarboxylase class-II family. SpeA subfamily	ADC1	GO:0001101,GO:0003674,GO:0003824,GO:0005488,GO:0005515,GO:0005575,GO:0005622,GO:0005623,GO:0005737,GO:0005829,GO:0006576,GO:0006595,GO:0006596,GO:0006807,GO:0006950,GO:0006970,GO:0006979,GO:0008150,GO:0008152,GO:0008792,GO:0009058,GO:0009266,GO:0009308,GO:0009309,GO:0009409,GO:0009445,GO:0009446,GO:0009507,GO:0009536,GO:0009611,GO:0009628,GO:0009651,GO:0009719,GO:0009725,GO:0009737,GO:0009753,GO:…	4.1.1.19	ko:K01583	ko00330,ko01100,map00330,map01100	M00133	R00566	RC00299	ko00000,ko00001,ko00002,ko01000	-	-	-	Orn_Arg_deC_N
Gene.33237::LRWT_f2p0_3037_transcript13063_g3::g.33237::m.33237	218851.Aquca_007_00366.1	0.0	1188.0	COG1166@1|root,2QTXD@2759|Eukaryota,37QVP@33090|Viridiplantae,3GFD1@35493|Streptophyta	35493|Streptophyta	H	Belongs to the Orn Lys Arg decarboxylase class-II family. SpeA subfamily	ADC1	GO:0001101,GO:0003674,GO:0003824,GO:0005488,GO:0005515,GO:0005575,GO:0005622,GO:0005623,GO:0005737,GO:0005829,GO:0006576,GO:0006595,GO:0006596,GO:0006807,GO:0006950,GO:0006970,GO:0006979,GO:0008150,GO:0008152,GO:0008792,GO:0009058,GO:0009266,GO:0009308,GO:0009309,GO:0009409,GO:0009445,GO:0009446,GO:0009507,GO:0009536,GO:0009611,GO:0009628,GO:0009651,GO:0009719,GO:0009725,GO:0009737,GO:0009753,GO:…	4.1.1.19	ko:K01583	ko00330,ko01100,map00330,map01100	M00133	R00566	RC00299	ko00000,ko00001,ko00002,ko01000	-	-	-	Orn_Arg_deC_N
Gene.103541::LRWT_f2p0_1267_transcript54938_g12::g.103541::m.103541	218851.Aquca_035_00239.1	2.73e-128	379.0	COG0287@1|root,KOG2380@2759|Eukaryota,37SZ4@33090|Viridiplantae,3GGMF@35493|Streptophyta	2759|Eukaryota	E	Arogenate dehydrogenase	TYR1	GO:0000166,GO:0003674,GO:0003824,GO:0005488,GO:0005575,GO:0005622,GO:0005623,GO:0005737,GO:0006082,GO:0006520,GO:0006570,GO:0006571,GO:0006725,GO:0006807,GO:0008150,GO:0008152,GO:0008652,GO:0008977,GO:0009058,GO:0009072,GO:0009073,GO:0009095,GO:0009987,GO:0016053,GO:0016491,GO:0016627,GO:0016628,GO:0019438,GO:0019752,GO:0036094,GO:0043167,GO:0043168,GO:0043436,GO:0044237,GO:0044238,GO:0044249,GO:…	1.3.1.13,1.3.1.78,2.7.1.15	ko:K00211,ko:K00852,ko:K12586,ko:K15227	ko00030,ko00400,ko01100,ko01110,ko01130,ko01230,ko03018,map00030,map00400,map01100,map01110,map01130,map01230,map03018	M00040,M00391	R00733,R01051,R01730,R02750	RC00002,RC00017,RC00125	ko00000,ko00001,ko00002,ko01000,ko03019	-	-	-	PDH,PDT
Gene.75164::LRWT_f12p0_1682_transcript36165_g1::g.75164::m.75164	218851.Aquca_049_00135.1	6.22e-316	863.0	COG2046@1|root,KOG0636@2759|Eukaryota,37M16@33090|Viridiplantae,3G7IZ@35493|Streptophyta	35493|Streptophyta	P	atp sulfurylase	-	GO:0000103,GO:0001887,GO:0003674,GO:0003824,GO:0004020,GO:0004779,GO:0004781,GO:0005575,GO:0005622,GO:0005623,GO:0005737,GO:0005739,GO:0005886,GO:0006790,GO:0006793,GO:0006796,GO:0006950,GO:0007154,GO:0008150,GO:0008152,GO:0009267,GO:0009507,GO:0009532,GO:0009536,GO:0009570,GO:0009605,GO:0009719,GO:0009725,GO:0009735,GO:0009970,GO:0009987,GO:0009991,GO:0010033,GO:0010035,GO:0010038,GO:0016020,GO:…	2.7.1.25,2.7.7.4	ko:K13811	ko00230,ko00261,ko00450,ko00920,ko01100,ko01120,ko01130,map00230,map00261,map00450,map00920,map01100,map01120,map01130	M00176	R00509,R00529,R04928,R04929	RC00002,RC00078,RC02809,RC02889	ko00000,ko00001,ko00002,ko01000	-	-	-	ATP-sulfurylase,PUA_2
Gene.62816::LRWT_f90p0_1923_transcript28758_g1::g.62816::m.62816	4432.XP_010252810.1	0.0	980.0	COG0055@1|root,KOG1350@2759|Eukaryota,37N26@33090|Viridiplantae,3G7JF@35493|Streptophyta	35493|Streptophyta	C	Produces ATP from ADP in the presence of a proton gradient across the membrane	ATPB	GO:0000166,GO:0003674,GO:0005488,GO:0005524,GO:0005575,GO:0005622,GO:0005623,GO:0005737,GO:0005739,GO:0005740,GO:0005743,GO:0006139,GO:0006163,GO:0006164,GO:0006725,GO:0006753,GO:0006754,GO:0006793,GO:0006796,GO:0006807,GO:0006810,GO:0006811,GO:0006812,GO:0008144,GO:0008150,GO:0008152,GO:0009058,GO:0009117,GO:0009123,GO:0009124,GO:0009126,GO:0009127,GO:0009141,GO:0009142,GO:0009144,GO:0009145,GO:…	3.6.3.14	ko:K02133	ko00190,ko01100,ko04714,ko05010,ko05012,ko05016,map00190,map01100,map04714,map05010,map05012,map05016	M00158	-	-	ko00000,ko00001,ko00002,ko01000	3.A.2.1	-	-	ATP-synt_ab,ATP-synt_ab_N,MAP65_ASE1,Synthase_beta
Gene.58711::LRWT_f3p0_2178_transcript26414_g4::g.58711::m.58711	218851.Aquca_002_01178.1	0.0	988.0	COG0055@1|root,KOG1350@2759|Eukaryota,37N26@33090|Viridiplantae,3G7JF@35493|Streptophyta	35493|Streptophyta	C	Produces ATP from ADP in the presence of a proton gradient across the membrane	ATPB	GO:0000166,GO:0003674,GO:0005488,GO:0005524,GO:0005575,GO:0005622,GO:0005623,GO:0005737,GO:0005739,GO:0005740,GO:0005743,GO:0006139,GO:0006163,GO:0006164,GO:0006725,GO:0006753,GO:0006754,GO:0006793,GO:0006796,GO:0006807,GO:0006810,GO:0006811,GO:0006812,GO:0008144,GO:0008150,GO:0008152,GO:0009058,GO:0009117,GO:0009123,GO:0009124,GO:0009126,GO:0009127,GO:0009141,GO:0009142,GO:0009144,GO:0009145,GO:…	3.6.3.14	ko:K02133	ko00190,ko01100,ko04714,ko05010,ko05012,ko05016,map00190,map01100,map04714,map05010,map05012,map05016	M00158	-	-	ko00000,ko00001,ko00002,ko01000	3.A.2.1	-	-	ATP-synt_ab,ATP-synt_ab_N,Synthase_beta
Gene.103210::LRWT_f4p0_1270_transcript54709_g3::g.103210::m.103210	218851.Aquca_010_00203.1	4.98e-198	553.0	COG0224@1|root,KOG1531@2759|Eukaryota,37PWG@33090|Viridiplantae,3GEZS@35493|Streptophyta	35493|Streptophyta	C	ATP synthase subunit gamma	-	GO:0003674,GO:0005488,GO:0005575,GO:0005618,GO:0005622,GO:0005623,GO:0005634,GO:0005730,GO:0005737,GO:0005739,GO:0005740,GO:0005743,GO:0005753,GO:0008270,GO:0009507,GO:0009536,GO:0016020,GO:0016469,GO:0019866,GO:0030312,GO:0031090,GO:0031966,GO:0031967,GO:0031974,GO:0031975,GO:0031981,GO:0032991,GO:0043167,GO:0043169,GO:0043226,GO:0043227,GO:0043228,GO:0043229,GO:0043231,GO:0043232,GO:0043233,GO:…	-	ko:K02136	ko00190,ko01100,ko04714,ko05010,ko05012,ko05016,map00190,map01100,map04714,map05010,map05012,map05016	M00158	-	-	ko00000,ko00001,ko00002	3.A.2.1	-	-	ATP-synt
Gene.93899::LRWT_f6p0_1430_transcript48198_g1::g.93899::m.93899	218851.Aquca_017_00412.1	6e-165	477.0	KOG1339@1|root,KOG1339@2759|Eukaryota,37Q1N@33090|Viridiplantae,3G89Y@35493|Streptophyta	35493|Streptophyta	O	Belongs to the peptidase A1 family	-	-	-	-	-	-	-	-	-	-	-	-	TAXi_C,TAXi_N
Gene.112898::LRWT_f2p0_1095_transcript61782_g9::g.112898::m.112898	218851.Aquca_017_00148.1	6.79e-117	340.0	KOG1623@1|root,KOG1623@2759|Eukaryota,37RMN@33090|Viridiplantae,3GGAT@35493|Streptophyta	35493|Streptophyta	L	Mediates both low-affinity uptake and efflux of sugar across the membrane	-	-	-	ko:K15382	-	-	-	-	ko00000,ko02000	9.A.58.1	-	-	MtN3_slv
Gene.100826::LRWT_f2p0_1310_transcript53041_g5::g.100826::m.100826	218851.Aquca_017_00209.1	1.17e-189	530.0	COG0190@1|root,KOG0089@2759|Eukaryota,37K6Z@33090|Viridiplantae,3GCGD@35493|Streptophyta	35493|Streptophyta	H	Bifunctional protein FolD	-	GO:0003674,GO:0003824,GO:0004477,GO:0004488,GO:0005575,GO:0005622,GO:0005623,GO:0005737,GO:0005829,GO:0006082,GO:0006575,GO:0006725,GO:0006730,GO:0006732,GO:0006760,GO:0006807,GO:0008150,GO:0008152,GO:0009507,GO:0009536,GO:0009987,GO:0016491,GO:0016645,GO:0016646,GO:0016787,GO:0016810,GO:0016814,GO:0019219,GO:0019222,GO:0019238,GO:0019752,GO:0031323,GO:0034641,GO:0042558,GO:0043226,GO:0043227,GO:…	-	-	-	-	-	-	-	-	-	-	THF_DHG_CYH,THF_DHG_CYH_C
Gene.85715::LRWT_f26p0_1578_transcript42798_g1::g.85715::m.85715	218851.Aquca_038_00102.1	6.85e-277	760.0	COG0501@1|root,KOG2719@2759|Eukaryota,37HF4@33090|Viridiplantae,3G8WY@35493|Streptophyta	35493|Streptophyta	O	CAAX prenyl protease 1 homolog	-	GO:0003674,GO:0003824,GO:0004175,GO:0004222,GO:0005575,GO:0005622,GO:0005623,GO:0005737,GO:0005773,GO:0005783,GO:0005789,GO:0006508,GO:0006807,GO:0008150,GO:0008152,GO:0008233,GO:0008237,GO:0009987,GO:0010467,GO:0012505,GO:0016020,GO:0016021,GO:0016485,GO:0016787,GO:0019538,GO:0030176,GO:0031224,GO:0031227,GO:0031984,GO:0042175,GO:0043170,GO:0043226,GO:0043227,GO:0043229,GO:0043231,GO:0044237,GO:…	3.4.24.84	ko:K06013	ko00900,ko01130,map00900,map01130	-	R09845	RC00141	ko00000,ko00001,ko01000,ko01002,ko04147	-	-	-	Peptidase_M48,Peptidase_M48_N
Gene.103586::LRWT_f3p0_1265_transcript54970_g5::g.103586::m.103586	218851.Aquca_028_00108.1	2.33e-153	442.0	KOG3178@1|root,KOG3178@2759|Eukaryota,37PDX@33090|Viridiplantae,3GE8D@35493|Streptophyta	35493|Streptophyta	GM	Belongs to the class I-like SAM-binding methyltransferase superfamily. Cation-independent O- methyltransferase family	-	-	2.1.1.111,2.1.1.68	ko:K12643,ko:K13066	ko00940,ko01058,ko01100,ko01110,map00940,map01058,map01100,map01110	M00039	R00984,R02379,R03366,R06574,R06575,R06576,R06577	RC00003,RC00335,RC00392	ko00000,ko00001,ko00002,ko01000	-	-	-	Dimerisation,Methyltransf_2
Gene.85428::LRWT_f12p0_1566_transcript42607_g1::g.85428::m.85428	218851.Aquca_058_00060.1	5.66e-235	656.0	KOG0674@1|root,KOG0674@2759|Eukaryota,37RM7@33090|Viridiplantae,3G8M6@35493|Streptophyta	35493|Streptophyta	O	Calreticulin-3-like	-	GO:0002218,GO:0002253,GO:0002376,GO:0002682,GO:0002684,GO:0005575,GO:0005622,GO:0005623,GO:0005737,GO:0005783,GO:0005789,GO:0006457,GO:0006950,GO:0006952,GO:0006955,GO:0007154,GO:0007165,GO:0008150,GO:0008152,GO:0008219,GO:0009605,GO:0009607,GO:0009617,GO:0009626,GO:0009812,GO:0009987,GO:0010204,GO:0012501,GO:0012505,GO:0016020,GO:0023052,GO:0031347,GO:0031349,GO:0031984,GO:0033554,GO:0034050,GO:…	-	ko:K08057	ko04141,ko04145,ko04612,ko05142,ko05166,map04141,map04145,map04612,map05142,map05166	-	-	-	ko00000,ko00001,ko03110,ko04091	-	-	-	Calreticulin
Gene.89919::LRWT_f7p0_1441_transcript45489_g1::g.89919::m.89919	218851.Aquca_003_00424.1	9.65e-216	601.0	COG4870@1|root,KOG1543@2759|Eukaryota,37QZK@33090|Viridiplantae,3G9A2@35493|Streptophyta	35493|Streptophyta	O	Belongs to the peptidase C1 family	-	GO:0000323,GO:0003674,GO:0003824,GO:0004175,GO:0004197,GO:0005575,GO:0005576,GO:0005615,GO:0005622,GO:0005623,GO:0005737,GO:0005764,GO:0005773,GO:0005829,GO:0006508,GO:0006807,GO:0008150,GO:0008152,GO:0008233,GO:0008234,GO:0009056,GO:0009057,GO:0009987,GO:0016787,GO:0019538,GO:0030163,GO:0043170,GO:0043226,GO:0043227,GO:0043229,GO:0043231,GO:0044237,GO:0044238,GO:0044248,GO:0044257,GO:0044260,GO:…	3.4.22.1	ko:K01363	ko04140,ko04142,ko04210,ko04612,ko04621,ko04924,map04140,map04142,map04210,map04612,map04621,map04924	-	-	-	ko00000,ko00001,ko00536,ko01000,ko01002,ko03110,ko04147	-	-	-	Peptidase_C1,Propeptide_C1
Gene.115298::LRWT_f6p0_995_transcript63623_g1::g.115298::m.115298	218851.Aquca_027_00079.1	3.93e-129	373.0	28P88@1|root,2QVVC@2759|Eukaryota,37HNC@33090|Viridiplantae,3GF33@35493|Streptophyta	35493|Streptophyta	S	Cell number regulator	-	-	-	-	-	-	-	-	-	-	-	-	PLAC8
Gene.92156::LRWT_f21p0_1445_transcript46989_g1::g.92156::m.92156	218851.Aquca_017_00017.1	1.5e-192	540.0	COG3979@1|root,KOG4742@2759|Eukaryota,37ME4@33090|Viridiplantae,3GEQT@35493|Streptophyta	35493|Streptophyta	S	Chitinase-like protein	POM1	GO:0000271,GO:0001101,GO:0001871,GO:0003674,GO:0005488,GO:0005575,GO:0005576,GO:0005622,GO:0005623,GO:0005737,GO:0005794,GO:0005975,GO:0005976,GO:0006073,GO:0006950,GO:0006970,GO:0007275,GO:0008150,GO:0008152,GO:0009058,GO:0009059,GO:0009250,GO:0009266,GO:0009408,GO:0009414,GO:0009415,GO:0009628,GO:0009651,GO:0009653,GO:0009719,GO:0009725,GO:0009735,GO:0009825,GO:0009888,GO:0009987,GO:0010015,GO:…	-	-	-	-	-	-	-	-	-	-	Glyco_hydro_19
Gene.34419::LRWT_f5p0_2910_transcript13625_g1::g.34419::m.34419	218851.Aquca_018_00235.1	0.0	1354.0	COG0038@1|root,KOG0474@2759|Eukaryota,37SNC@33090|Viridiplantae,3GA0V@35493|Streptophyta	35493|Streptophyta	P	Chloride channel protein	-	GO:0000325,GO:0003674,GO:0005215,GO:0005216,GO:0005244,GO:0005247,GO:0005253,GO:0005254,GO:0005575,GO:0005622,GO:0005623,GO:0005737,GO:0005773,GO:0005774,GO:0006810,GO:0006811,GO:0006820,GO:0006821,GO:0008150,GO:0008308,GO:0008509,GO:0009705,GO:0015075,GO:0015103,GO:0015108,GO:0015267,GO:0015318,GO:0015698,GO:0016020,GO:0022803,GO:0022832,GO:0022836,GO:0022838,GO:0022839,GO:0022857,GO:0031090,GO:…	-	ko:K05016	-	-	-	-	ko00000,ko01009,ko04040	2.A.49.3.3	-	-	CBS,Voltage_CLC
Gene.36281::LRWT_f9p0_2889_transcript14517_g1::g.36281::m.36281	218851.Aquca_018_00235.1	0.0	1354.0	COG0038@1|root,KOG0474@2759|Eukaryota,37SNC@33090|Viridiplantae,3GA0V@35493|Streptophyta	35493|Streptophyta	P	Chloride channel protein	-	GO:0000325,GO:0003674,GO:0005215,GO:0005216,GO:0005244,GO:0005247,GO:0005253,GO:0005254,GO:0005575,GO:0005622,GO:0005623,GO:0005737,GO:0005773,GO:0005774,GO:0006810,GO:0006811,GO:0006820,GO:0006821,GO:0008150,GO:0008308,GO:0008509,GO:0009705,GO:0015075,GO:0015103,GO:0015108,GO:0015267,GO:0015318,GO:0015698,GO:0016020,GO:0022803,GO:0022832,GO:0022836,GO:0022838,GO:0022839,GO:0022857,GO:0031090,GO:…	-	ko:K05016	-	-	-	-	ko00000,ko01009,ko04040	2.A.49.3.3	-	-	CBS,Voltage_CLC
Gene.103562::LRWT_f29p0_1180_transcript54953_g1::g.103562::m.103562	218851.Aquca_002_00742.1	1.12e-177	501.0	COG1605@1|root,KOG0795@2759|Eukaryota,37MUR@33090|Viridiplantae,3GFMG@35493|Streptophyta	35493|Streptophyta	E	chorismate mutase	CM1	GO:0000162,GO:0003674,GO:0003824,GO:0004106,GO:0004601,GO:0005575,GO:0005622,GO:0005623,GO:0005737,GO:0005829,GO:0006082,GO:0006520,GO:0006568,GO:0006576,GO:0006586,GO:0006725,GO:0006807,GO:0006950,GO:0006952,GO:0008150,GO:0008152,GO:0008652,GO:0009058,GO:0009072,GO:0009073,GO:0009308,GO:0009309,GO:0009536,GO:0009605,GO:0009607,GO:0009617,GO:0009636,GO:0009987,GO:0016053,GO:0016209,GO:0016491,GO:…	5.4.99.5	ko:K01850	ko00400,ko01100,ko01110,ko01130,ko01230,map00400,map01100,map01110,map01130,map01230	M00024,M00025	R01715	RC03116	ko00000,ko00001,ko00002,ko01000	-	-	-	-
Gene.80522::LRWT_f3p0_1686_transcript39504_g5::g.80522::m.80522	218851.Aquca_034_00091.1	3.22e-224	631.0	KOG1192@1|root,KOG1192@2759|Eukaryota,37SXF@33090|Viridiplantae,3GAE4@35493|Streptophyta	35493|Streptophyta	CG	Belongs to the UDP-glycosyltransferase family	-	GO:0003674,GO:0003824,GO:0005575,GO:0005622,GO:0005623,GO:0005737,GO:0005794,GO:0008194,GO:0012505,GO:0016740,GO:0016757,GO:0016758,GO:0035251,GO:0043226,GO:0043227,GO:0043229,GO:0043231,GO:0044424,GO:0044444,GO:0044464,GO:0046527,GO:0080043,GO:0080044	2.4.1.218,2.4.1.271,2.4.1.324	ko:K08237,ko:K21371,ko:K21374	-	-	-	-	ko00000,ko01000,ko01003	-	GT1	-	UDPGT
Gene.39107::LRWT_f3p0_2772_transcript15912_g1::g.39107::m.39107	218851.Aquca_007_00732.1	7.98e-69	223.0	COG4870@1|root,KOG4296@1|root,KOG1543@2759|Eukaryota,KOG4296@2759|Eukaryota,37S7C@33090|Viridiplantae,3G8BZ@35493|Streptophyta	35493|Streptophyta	O	Belongs to the peptidase C1 family	-	GO:0000323,GO:0000932,GO:0003674,GO:0003824,GO:0004175,GO:0004197,GO:0005575,GO:0005576,GO:0005615,GO:0005622,GO:0005623,GO:0005737,GO:0005764,GO:0005773,GO:0005911,GO:0006508,GO:0006807,GO:0006950,GO:0006952,GO:0008150,GO:0008152,GO:0008233,GO:0008234,GO:0009056,GO:0009057,GO:0009506,GO:0009507,GO:0009536,GO:0009605,GO:0009607,GO:0009620,GO:0009987,GO:0010494,GO:0016787,GO:0019538,GO:0030054,GO:…	-	-	-	-	-	-	-	-	-	-	Granulin,Inhibitor_I29,Peptidase_C1
Gene.39106::LRWT_f3p0_2772_transcript15912_g1::g.39106::m.39106	4432.XP_010244238.1	1.83e-128	379.0	COG4870@1|root,KOG4296@1|root,KOG1543@2759|Eukaryota,KOG4296@2759|Eukaryota,37S7C@33090|Viridiplantae,3G8BZ@35493|Streptophyta	35493|Streptophyta	O	Belongs to the peptidase C1 family	-	GO:0000323,GO:0000932,GO:0003674,GO:0003824,GO:0004175,GO:0004197,GO:0005575,GO:0005576,GO:0005615,GO:0005622,GO:0005623,GO:0005737,GO:0005764,GO:0005773,GO:0005911,GO:0006508,GO:0006807,GO:0006950,GO:0006952,GO:0008150,GO:0008152,GO:0008233,GO:0008234,GO:0009056,GO:0009057,GO:0009506,GO:0009507,GO:0009536,GO:0009605,GO:0009607,GO:0009620,GO:0009987,GO:0010494,GO:0016787,GO:0019538,GO:0030054,GO:…	-	-	-	-	-	-	-	-	-	-	Granulin,Inhibitor_I29,Peptidase_C1
Gene.97860::LRWT_f8p0_1356_transcript50939_g4::g.97860::m.97860	218851.Aquca_049_00210.1	3.54e-211	586.0	COG0031@1|root,KOG1252@2759|Eukaryota,37MTM@33090|Viridiplantae,3G849@35493|Streptophyta	35493|Streptophyta	E	Belongs to the cysteine synthase cystathionine beta- synthase family	OASA1	GO:0000003,GO:0000096,GO:0000097,GO:0000902,GO:0000904,GO:0003006,GO:0003674,GO:0003824,GO:0004124,GO:0005488,GO:0005575,GO:0005576,GO:0005622,GO:0005623,GO:0005634,GO:0005737,GO:0005773,GO:0005774,GO:0005777,GO:0005829,GO:0005886,GO:0006082,GO:0006520,GO:0006534,GO:0006535,GO:0006563,GO:0006790,GO:0006807,GO:0007568,GO:0008144,GO:0008150,GO:0008152,GO:0008652,GO:0009058,GO:0009069,GO:0009070,GO:…	2.5.1.47	ko:K01738	ko00270,ko00920,ko01100,ko01110,ko01120,ko01130,ko01200,ko01230,map00270,map00920,map01100,map01110,map01120,map01130,map01200,map01230	M00021	R00897,R03601,R04859	RC00020,RC02814,RC02821	ko00000,ko00001,ko00002,ko01000	-	-	-	PALP
Gene.84244::LRWT_f22p0_1525_transcript41852_g1::g.84244::m.84244	218851.Aquca_058_00055.1	2.57e-224	625.0	COG0031@1|root,KOG1252@2759|Eukaryota,37MTM@33090|Viridiplantae,3G7J0@35493|Streptophyta	35493|Streptophyta	E	Belongs to the cysteine synthase cystathionine beta- synthase family	-	-	2.5.1.47	ko:K01738	ko00270,ko00920,ko01100,ko01110,ko01120,ko01130,ko01200,ko01230,map00270,map00920,map01100,map01110,map01120,map01130,map01200,map01230	M00021	R00897,R03601,R04859	RC00020,RC02814,RC02821	ko00000,ko00001,ko00002,ko01000	-	-	-	PALP
Gene.106080::LRWT_f43p0_1189_transcript56770_g1::g.106080::m.106080	218851.Aquca_043_00045.1	2.48e-156	444.0	COG0723@1|root,KOG1671@2759|Eukaryota,37J6S@33090|Viridiplantae,3GAZM@35493|Streptophyta	35493|Streptophyta	C	Component of the ubiquinol-cytochrome c reductase complex (complex III or cytochrome b-c1 complex), which is a respiratory chain that generates an electrochemical potential coupled to ATP synthesis	-	GO:0003674,GO:0003824,GO:0005488,GO:0005575,GO:0005622,GO:0005623,GO:0005737,GO:0005739,GO:0005740,GO:0005743,GO:0005746,GO:0005750,GO:0006091,GO:0006950,GO:0008121,GO:0008150,GO:0008152,GO:0009055,GO:0009060,GO:0009266,GO:0009408,GO:0009628,GO:0009987,GO:0015980,GO:0016020,GO:0016491,GO:0016679,GO:0016681,GO:0019866,GO:0022900,GO:0031090,GO:0031966,GO:0031967,GO:0031975,GO:0032991,GO:0043167,GO:…	1.10.2.2	ko:K00411	ko00190,ko01100,ko02020,ko04260,ko04714,ko04932,ko05010,ko05012,ko05016,map00190,map01100,map02020,map04260,map04714,map04932,map05010,map05012,map05016	M00151,M00152	-	-	ko00000,ko00001,ko00002,ko01000	-	-	-	Rieske,UCR_TM
Gene.45552::LRWT_f3p0_2596_transcript19239_g5::g.45552::m.45552	218851.Aquca_068_00004.1	0.0	988.0	COG0111@1|root,KOG0068@2759|Eukaryota,37HGR@33090|Viridiplantae,3GA4F@35493|Streptophyta	35493|Streptophyta	E	Belongs to the D-isomer specific 2-hydroxyacid dehydrogenase family	PGDH	GO:0005575,GO:0005622,GO:0005623,GO:0005634,GO:0005737,GO:0005829,GO:0009507,GO:0009532,GO:0009536,GO:0009570,GO:0043226,GO:0043227,GO:0043229,GO:0043231,GO:0044422,GO:0044424,GO:0044434,GO:0044435,GO:0044444,GO:0044446,GO:0044464	1.1.1.399,1.1.1.95	ko:K00058	ko00260,ko00680,ko01100,ko01120,ko01130,ko01200,ko01230,map00260,map00680,map01100,map01120,map01130,map01200,map01230	M00020	R01513	RC00031	ko00000,ko00001,ko00002,ko01000,ko04147	-	-	-	2-Hacid_dh,2-Hacid_dh_C,ACT
Gene.63374::LRWT_f6p0_2027_transcript29085_g2::g.63374::m.63374	218851.Aquca_014_00821.1	0.0	929.0	COG0471@1|root,2QQ8W@2759|Eukaryota,37K26@33090|Viridiplantae,3G9CR@35493|Streptophyta	35493|Streptophyta	P	Dicarboxylate transporter 1	-	GO:0003674,GO:0005215,GO:0005310,GO:0005342,GO:0005575,GO:0005622,GO:0005623,GO:0005737,GO:0005739,GO:0006082,GO:0006520,GO:0006536,GO:0006541,GO:0006807,GO:0006810,GO:0006811,GO:0006820,GO:0006835,GO:0008150,GO:0008152,GO:0008509,GO:0008514,GO:0009064,GO:0009507,GO:0009526,GO:0009534,GO:0009536,GO:0009579,GO:0009605,GO:0009607,GO:0009624,GO:0009941,GO:0009987,GO:0015075,GO:0015131,GO:0015139,GO:…	-	-	-	-	-	-	-	-	-	-	Na_sulph_symp
Gene.71337::LRWT_f2p0_1865_transcript33852_g10::g.71337::m.71337	218851.Aquca_003_00398.1	0.0	882.0	COG1249@1|root,KOG1335@2759|Eukaryota,37PEG@33090|Viridiplantae,3GEXX@35493|Streptophyta	35493|Streptophyta	C	Dihydrolipoyl dehydrogenase	-	GO:0000166,GO:0003674,GO:0003824,GO:0004148,GO:0005488,GO:0005507,GO:0005524,GO:0005575,GO:0005576,GO:0005622,GO:0005623,GO:0005737,GO:0005739,GO:0005740,GO:0005743,GO:0005746,GO:0005747,GO:0005759,GO:0008144,GO:0008150,GO:0008152,GO:0008270,GO:0009507,GO:0009536,GO:0010035,GO:0010038,GO:0016020,GO:0016491,GO:0016651,GO:0016667,GO:0016668,GO:0017076,GO:0019866,GO:0030554,GO:0030964,GO:0031090,GO:…	1.8.1.4	ko:K00382	ko00010,ko00020,ko00260,ko00280,ko00620,ko00630,ko00640,ko01100,ko01110,ko01120,ko01130,ko01200,map00010,map00020,map00260,map00280,map00620,map00630,map00640,map01100,map01110,map01120,map01130,map01200	M00009,M00011,M00036,M00307,M00532	R00209,R01221,R01698,R03815,R07618,R08549	RC00004,RC00022,RC00583,RC02742,RC02833,RC02834	br01601,ko00000,ko00001,ko00002,ko01000,ko04147	-	-	-	Pyr_redox_2,Pyr_redox_dim
Gene.127009::LRWT_f13p0_782_transcript73053_g1::g.127009::m.127009	218851.Aquca_027_00380.1	4.93e-50	166.0	KOG1030@1|root,KOG1030@2759|Eukaryota,37VMD@33090|Viridiplantae,3GINA@35493|Streptophyta	35493|Streptophyta	G	elicitor-responsive protein	-	-	-	-	-	-	-	-	-	-	-	-	C2
Gene.29306::LRWT_f3p0_3182_transcript11231_g1::g.29306::m.29306	218851.Aquca_125_00012.1	0.0	1623.0	COG0480@1|root,KOG0469@2759|Eukaryota,37P17@33090|Viridiplantae,3GE6J@35493|Streptophyta	35493|Streptophyta	J	Elongation factor	-	GO:0005575,GO:0005622,GO:0005623,GO:0005737,GO:0044424,GO:0044464	-	ko:K03234	ko04152,ko04921,map04152,map04921	-	-	-	ko00000,ko00001,ko03012,ko04147	-	-	-	EFG_C,EFG_II,EFG_IV,GTP_EFTU,GTP_EFTU_D2
Gene.82306::LRWT_f2p0_1654_transcript40626_g4::g.82306::m.82306	218851.Aquca_014_00390.1	5.99e-179	514.0	COG0654@1|root,KOG2614@2759|Eukaryota	2759|Eukaryota	CH	FAD binding	-	GO:0001101,GO:0003674,GO:0003824,GO:0004497,GO:0005575,GO:0005622,GO:0005623,GO:0005737,GO:0006066,GO:0006082,GO:0006629,GO:0006714,GO:0006720,GO:0006721,GO:0006950,GO:0007154,GO:0007165,GO:0008150,GO:0008152,GO:0008299,GO:0008610,GO:0009058,GO:0009266,GO:0009314,GO:0009408,GO:0009414,GO:0009415,GO:0009416,GO:0009507,GO:0009526,GO:0009536,GO:0009540,GO:0009628,GO:0009639,GO:0009687,GO:0009688,GO:…	-	-	-	-	-	-	-	-	-	-	FAD_binding_3
Gene.91182::LRWT_f2p0_1492_transcript46339_g5::g.91182::m.91182	218851.Aquca_039_00032.1	1.95e-181	515.0	KOG1559@1|root,KOG1559@2759|Eukaryota,37R4F@33090|Viridiplantae,3GGHU@35493|Streptophyta	35493|Streptophyta	H	Gamma-glutamyl hydrolase	GGH1	GO:0003674,GO:0003824,GO:0005575,GO:0005576,GO:0005615,GO:0005618,GO:0005622,GO:0005623,GO:0005737,GO:0005773,GO:0006082,GO:0006508,GO:0006575,GO:0006725,GO:0006732,GO:0006760,GO:0006807,GO:0008150,GO:0008152,GO:0008233,GO:0008238,GO:0008242,GO:0009987,GO:0016787,GO:0019538,GO:0019752,GO:0030312,GO:0034641,GO:0034722,GO:0042558,GO:0043170,GO:0043226,GO:0043227,GO:0043229,GO:0043231,GO:0043436,GO:…	3.4.19.9	ko:K01307	ko00790,ko01523,map00790,map01523	-	R04242	RC00064,RC00090	ko00000,ko00001,ko01000,ko01002	-	-	-	Peptidase_C26
Gene.73860::LRWT_f14p0_1762_transcript35364_g1::g.73860::m.73860	3656.XP_008463152.1	0.0	913.0	COG0076@1|root,KOG1383@2759|Eukaryota,37PA0@33090|Viridiplantae,3GGE7@35493|Streptophyta,4JDKD@91835|fabids	35493|Streptophyta	E	Belongs to the group II decarboxylase family	-	-	4.1.1.15	ko:K01580	ko00250,ko00410,ko00430,ko00650,ko01100,ko01110,ko01120,ko02024,ko04727,ko04940,map00250,map00410,map00430,map00650,map01100,map01110,map01120,map02024,map04727,map04940	M00027	R00261,R00489,R01682,R02466	RC00299	ko00000,ko00001,ko00002,ko01000	-	-	-	Pyridoxal_deC
Gene.77371::LRWT_f3p0_1764_transcript37541_g9::g.77371::m.77371	218851.Aquca_021_00070.1	1.06e-286	790.0	COG4992@1|root,KOG1401@2759|Eukaryota,37NS6@33090|Viridiplantae,3G7N0@35493|Streptophyta	35493|Streptophyta	E	Belongs to the class-III pyridoxal-phosphate-dependent aminotransferase family	GSA1	GO:0005575,GO:0005576,GO:0005622,GO:0005623,GO:0005737,GO:0009507,GO:0009526,GO:0009532,GO:0009536,GO:0009570,GO:0009941,GO:0031967,GO:0031975,GO:0043226,GO:0043227,GO:0043229,GO:0043231,GO:0044422,GO:0044424,GO:0044434,GO:0044435,GO:0044444,GO:0044446,GO:0044464,GO:0048046	5.4.3.8	ko:K01845	ko00860,ko01100,ko01110,ko01120,map00860,map01100,map01110,map01120	M00121	R02272	RC00677	ko00000,ko00001,ko00002,ko01000,ko01007	-	-	-	Aminotran_3
Gene.80019::LRWT_f31p0_1596_transcript39194_g1::g.80019::m.80019	218851.Aquca_030_00323.1	4.91e-255	706.0	COG0057@1|root,KOG0657@2759|Eukaryota,37HSA@33090|Viridiplantae,3GEIW@35493|Streptophyta	35493|Streptophyta	G	Belongs to the glyceraldehyde-3-phosphate dehydrogenase family	-	GO:0000003,GO:0003006,GO:0003674,GO:0003824,GO:0004365,GO:0005488,GO:0005507,GO:0005575,GO:0005622,GO:0005623,GO:0005737,GO:0005975,GO:0007275,GO:0008150,GO:0008152,GO:0008270,GO:0009536,GO:0009555,GO:0009719,GO:0009725,GO:0009735,GO:0009791,GO:0009908,GO:0010033,GO:0016020,GO:0016491,GO:0016620,GO:0016903,GO:0022414,GO:0022622,GO:0032501,GO:0032502,GO:0042221,GO:0042592,GO:0043167,GO:0043169,GO:…	1.2.1.12	ko:K00134	ko00010,ko00710,ko01100,ko01110,ko01120,ko01130,ko01200,ko01230,ko04066,ko05010,map00010,map00710,map01100,map01110,map01120,map01130,map01200,map01230,map04066,map05010	M00001,M00002,M00003,M00165,M00166,M00308,M00552	R01061	RC00149	ko00000,ko00001,ko00002,ko01000,ko04131,ko04147	-	-	-	Gp_dh_C,Gp_dh_N
Gene.19515::LRWT_f2p0_3630_transcript6930_g6::g.19515::m.19515	218851.Aquca_001_00089.1	0.0	1871.0	COG1003@1|root,KOG2040@2759|Eukaryota,37JTX@33090|Viridiplantae,3GEI5@35493|Streptophyta	35493|Streptophyta	E	The glycine cleavage system catalyzes the degradation of glycine	-	GO:0000166,GO:0001505,GO:0003674,GO:0005488,GO:0005524,GO:0005575,GO:0005576,GO:0005622,GO:0005623,GO:0005737,GO:0005739,GO:0006082,GO:0006520,GO:0006544,GO:0006546,GO:0006807,GO:0008144,GO:0008150,GO:0008152,GO:0009056,GO:0009063,GO:0009069,GO:0009071,GO:0009507,GO:0009526,GO:0009532,GO:0009534,GO:0009536,GO:0009570,GO:0009579,GO:0009941,GO:0009987,GO:0010035,GO:0010038,GO:0016054,GO:0017076,GO:…	1.4.4.2	ko:K00281	ko00260,ko00630,ko01100,ko01110,ko01130,ko01200,map00260,map00630,map01100,map01110,map01130,map01200	M00532	R01221,R03425	RC00022,RC00929,RC02834,RC02880	ko00000,ko00001,ko00002,ko01000	-	-	-	GDC-P
Gene.40832::LRWT_f3p0_2771_transcript16775_g2::g.40832::m.40832	218851.Aquca_017_00147.1	0.0	1259.0	COG1024@1|root,KOG1683@2759|Eukaryota,37J3I@33090|Viridiplantae,3GC53@35493|Streptophyta	35493|Streptophyta	I	Belongs to the enoyl-CoA hydratase isomerase family	-	-	1.1.1.211,1.1.1.35,4.2.1.17	ko:K10527	ko00071,ko00592,ko01100,ko01110,ko01212,map00071,map00592,map01100,map01110,map01212	M00087,M00113	R01975,R03026,R04170,R04737,R04738,R04739,R04740,R04741,R04743,R04744,R04745,R04746,R04748,R04749,R07889,R07890,R07893,R07894,R07897,R07898	RC00029,RC00117,RC00831,RC01095	ko00000,ko00001,ko00002,ko01000	-	-	-	3HCDH,3HCDH_N,ECH_1
Gene.83733::LRWT_f9p0_1606_transcript41530_g1::g.83733::m.83733	218851.Aquca_083_00046.1	1.06e-124	380.0	KOG2824@1|root,KOG2824@2759|Eukaryota	2759|Eukaryota	T	protein disulfide oxidoreductase activity	-	-	-	-	-	-	-	-	-	-	-	-	Glutaredoxin,Pkinase_Tyr
Gene.51312::LRWT_f5p0_2350_transcript22303_g1::g.51312::m.51312	4432.XP_010244687.1	0.0	1145.0	COG0443@1|root,KOG0102@2759|Eukaryota,37PN3@33090|Viridiplantae,3G8FG@35493|Streptophyta	35493|Streptophyta	O	Belongs to the heat shock protein 70 family	-	-	-	ko:K04043	ko03018,ko04212,ko05152,map03018,map04212,map05152	-	-	-	ko00000,ko00001,ko03019,ko03029,ko03110,ko04147	1.A.33.1	-	-	HSP70
Gene.48937::LRWT_f2p0_2489_transcript21021_g3::g.48937::m.48937	4641.GSMUA_Achr1P14770_001	2.59e-245	683.0	COG5064@1|root,KOG0166@2759|Eukaryota,37HJI@33090|Viridiplantae,3GAGW@35493|Streptophyta,3KURU@4447|Liliopsida	35493|Streptophyta	U	Binds specifically and directly to substrates containing either a simple or bipartite NLS motif. Promotes docking of import substrates to the nuclear envelope	-	GO:0003674,GO:0005048,GO:0005215,GO:0005488,GO:0005575,GO:0005622,GO:0005623,GO:0005634,GO:0005635,GO:0005643,GO:0005654,GO:0005737,GO:0005829,GO:0006606,GO:0006607,GO:0006810,GO:0006886,GO:0006913,GO:0008104,GO:0008139,GO:0008150,GO:0008565,GO:0012505,GO:0015031,GO:0015833,GO:0017038,GO:0031967,GO:0031974,GO:0031975,GO:0031981,GO:0032991,GO:0033036,GO:0033218,GO:0033365,GO:0034504,GO:0034613,GO:…	-	-	-	-	-	-	-	-	-	-	Arm,Arm_3,IBB
Gene.64591::LRWT_f4p0_1972_transcript29808_g2::g.64591::m.64591	102107.XP_008244478.1	6.1e-167	481.0	COG0059@1|root,2QQBF@2759|Eukaryota,37N70@33090|Viridiplantae,3GEYV@35493|Streptophyta,4JE4U@91835|fabids	35493|Streptophyta	E	Ketol-acid reductoisomerase	-	-	1.1.1.86	ko:K00053	ko00290,ko00770,ko01100,ko01110,ko01130,ko01210,ko01230,map00290,map00770,map01100,map01110,map01130,map01210,map01230	M00019,M00570	R03051,R04439,R04440,R05068,R05069,R05071	RC00726,RC00836,RC00837,RC01726	ko00000,ko00001,ko00002,ko01000	-	-	-	IlvC,IlvN
Gene.64590::LRWT_f4p0_1972_transcript29808_g2::g.64590::m.64590	218851.Aquca_055_00005.1	1.17e-162	473.0	COG0059@1|root,2QQBF@2759|Eukaryota,37N70@33090|Viridiplantae,3GEYV@35493|Streptophyta	35493|Streptophyta	E	ketol-acid reductoisomerase	-	GO:0000166,GO:0000287,GO:0003674,GO:0005488,GO:0005507,GO:0005515,GO:0005575,GO:0005576,GO:0005618,GO:0005622,GO:0005623,GO:0005737,GO:0005739,GO:0008150,GO:0009507,GO:0009526,GO:0009532,GO:0009536,GO:0009570,GO:0009941,GO:0010035,GO:0010038,GO:0030312,GO:0031967,GO:0031975,GO:0036094,GO:0042221,GO:0042802,GO:0042803,GO:0043167,GO:0043168,GO:0043169,GO:0043226,GO:0043227,GO:0043229,GO:0043231,GO:…	1.1.1.86	ko:K00053	ko00290,ko00770,ko01100,ko01110,ko01130,ko01210,ko01230,map00290,map00770,map01100,map01110,map01130,map01210,map01230	M00019,M00570	R03051,R04439,R04440,R05068,R05069,R05071	RC00726,RC00836,RC00837,RC01726	ko00000,ko00001,ko00002,ko01000	-	-	-	IlvC,IlvN
Gene.34680::LRWT_f64p0_2856_transcript13746_g1::g.34680::m.34680	218851.Aquca_009_00189.1	0.0	1224.0	28IFU@1|root,2QQSP@2759|Eukaryota,37IPE@33090|Viridiplantae,3GE0G@35493|Streptophyta	35493|Streptophyta	E	Plant lipoxygenase may be involved in a number of diverse aspects of plant physiology including growth and development, pest resistance, and senescence or responses to wounding	-	GO:0001101,GO:0003674,GO:0003824,GO:0005575,GO:0005622,GO:0005623,GO:0005737,GO:0006082,GO:0006629,GO:0006631,GO:0006690,GO:0006950,GO:0008150,GO:0008152,GO:0009058,GO:0009507,GO:0009526,GO:0009532,GO:0009534,GO:0009535,GO:0009536,GO:0009570,GO:0009579,GO:0009605,GO:0009607,GO:0009611,GO:0009617,GO:0009620,GO:0009694,GO:0009695,GO:0009719,GO:0009725,GO:0009751,GO:0009753,GO:0009941,GO:0009987,GO:…	1.13.11.12	ko:K00454	ko00591,ko00592,ko01100,ko01110,map00591,map00592,map01100,map01110	M00113	R03626,R07864,R07869	RC00561	ko00000,ko00001,ko00002,ko01000	-	-	-	Lipoxygenase,PLAT
Gene.43006::LRWT_f3p0_2686_transcript17904_g1::g.43006::m.43006	218851.Aquca_014_00328.1	0.0	914.0	28M3M@1|root,2R42M@2759|Eukaryota,37PFK@33090|Viridiplantae,3GGQ3@35493|Streptophyta	35493|Streptophyta	S	Lipase-like PAD4	PAD4	-	-	-	-	-	-	-	-	-	-	-	Lipase_3
Gene.41240::LRWT_f27p0_2617_transcript16995_g1::g.41240::m.41240	218851.Aquca_017_00438.1	0.0	1245.0	COG1022@1|root,KOG1256@2759|Eukaryota,37QX3@33090|Viridiplantae,3GBB4@35493|Streptophyta	35493|Streptophyta	I	Long chain acyl-CoA synthetase	LACS7	GO:0000302,GO:0001101,GO:0001676,GO:0003674,GO:0003824,GO:0004467,GO:0005575,GO:0005622,GO:0005623,GO:0005737,GO:0005777,GO:0006082,GO:0006629,GO:0006631,GO:0006950,GO:0006970,GO:0006979,GO:0008150,GO:0008152,GO:0009628,GO:0009651,GO:0009987,GO:0010035,GO:0010193,GO:0015645,GO:0016020,GO:0016405,GO:0016874,GO:0016877,GO:0016878,GO:0019752,GO:0032787,GO:0042221,GO:0042493,GO:0042579,GO:0043226,GO:…	6.2.1.3	ko:K01897	ko00061,ko00071,ko01100,ko01212,ko02024,ko03320,ko04146,ko04216,ko04714,ko04920,map00061,map00071,map01100,map01212,map02024,map03320,map04146,map04216,map04714,map04920	M00086	R01280	RC00004,RC00014	ko00000,ko00001,ko00002,ko01000,ko01004,ko04147	4.C.1.1	-	-	AMP-binding,AMP-binding_C
Gene.93095::LRWT_f3p0_1467_transcript47625_g7::g.93095::m.93095	218851.Aquca_010_00261.1	1.14e-197	560.0	KOG1192@1|root,KOG1192@2759|Eukaryota,37M5H@33090|Viridiplantae,3G79K@35493|Streptophyta	35493|Streptophyta	CG	Belongs to the UDP-glycosyltransferase family	-	GO:0003674,GO:0003824,GO:0005575,GO:0005622,GO:0005623,GO:0005737,GO:0005829,GO:0008194,GO:0016740,GO:0016757,GO:0016758,GO:0035251,GO:0043226,GO:0043227,GO:0043229,GO:0043231,GO:0044424,GO:0044444,GO:0044464,GO:0046527,GO:0080043,GO:0080044	-	-	-	-	-	-	-	-	-	-	UDPGT
Gene.82243::LRWT_f3p0_1655_transcript40586_g2::g.82243::m.82243	102107.XP_008224355.1	1.49e-227	628.0	COG0039@1|root,KOG1496@2759|Eukaryota,37N4Q@33090|Viridiplantae,3GAE1@35493|Streptophyta,4JH3F@91835|fabids	35493|Streptophyta	C	Malate dehydrogenase	-	GO:0003674,GO:0003824,GO:0005575,GO:0005622,GO:0005623,GO:0005737,GO:0006082,GO:0006091,GO:0006099,GO:0006101,GO:0006107,GO:0006108,GO:0006139,GO:0006725,GO:0006732,GO:0006733,GO:0006734,GO:0006753,GO:0006793,GO:0006796,GO:0006807,GO:0008150,GO:0008152,GO:0009060,GO:0009117,GO:0009987,GO:0015980,GO:0016491,GO:0016614,GO:0016615,GO:0016616,GO:0016999,GO:0017144,GO:0019362,GO:0019637,GO:0019674,GO:…	1.1.1.37	ko:K00025	ko00020,ko00270,ko00620,ko00630,ko00710,ko01100,ko01110,ko01120,ko01130,ko01200,ko04964,map00020,map00270,map00620,map00630,map00710,map01100,map01110,map01120,map01130,map01200,map04964	M00009,M00011,M00012,M00168,M00171	R00342,R07136	RC00031	ko00000,ko00001,ko00002,ko01000	-	-	-	Ldh_1_C,Ldh_1_N
Gene.58326::LRWT_f4p0_2168_transcript26191_g3::g.58326::m.58326	218851.Aquca_004_00570.1	0.0	1115.0	COG0685@1|root,KOG0564@2759|Eukaryota,37IS3@33090|Viridiplantae,3GF9V@35493|Streptophyta	35493|Streptophyta	E	Methylenetetrahydrofolate reductase	-	GO:0003674,GO:0003824,GO:0004489,GO:0005575,GO:0005622,GO:0005623,GO:0005737,GO:0005829,GO:0006730,GO:0008150,GO:0008152,GO:0009987,GO:0016491,GO:0016645,GO:0016646,GO:0044237,GO:0044281,GO:0044424,GO:0044444,GO:0044464,GO:0055114	1.5.1.20,3.6.4.12	ko:K00297,ko:K10901	ko00670,ko00720,ko01100,ko01120,ko01200,ko01523,ko03440,ko03460,map00670,map00720,map01100,map01120,map01200,map01523,map03440,map03460	M00295,M00377,M00414	R01224,R07168	RC00081	ko00000,ko00001,ko00002,ko01000,ko03032,ko03400	-	-	-	MTHFR
Gene.69692::LRWT_f43p0_1832_transcript32860_g1::g.69692::m.69692	218851.Aquca_007_00538.1	0.0	927.0	KOG2449@1|root,KOG2449@2759|Eukaryota,37I7H@33090|Viridiplantae,3GB8N@35493|Streptophyta	35493|Streptophyta	EG	Methylmalonate-semialdehyde dehydrogenase	-	GO:0003674,GO:0005488,GO:0005507,GO:0005575,GO:0005622,GO:0005623,GO:0005737,GO:0005739,GO:0006950,GO:0006979,GO:0008150,GO:0043167,GO:0043169,GO:0043226,GO:0043227,GO:0043229,GO:0043231,GO:0044424,GO:0044444,GO:0044464,GO:0046872,GO:0046914,GO:0050896	1.2.1.18,1.2.1.27	ko:K00140	ko00280,ko00410,ko00562,ko00640,ko01100,ko01200,map00280,map00410,map00562,map00640,map01100,map01200	M00013	R00705,R00706,R00922,R00935	RC00004,RC02723,RC02817	ko00000,ko00001,ko00002,ko01000	-	-	-	Aldedh
Gene.101851::LRWT_f9p0_1287_transcript53754_g1::g.101851::m.101851	29760.VIT_07s0129g00170.t01	8.5e-137	394.0	KOG3126@1|root,KOG3126@2759|Eukaryota,37MKZ@33090|Viridiplantae,3G81X@35493|Streptophyta	35493|Streptophyta	P	Mitochondrial outer membrane protein porin	VDAC5	-	-	ko:K15040	ko04020,ko04022,ko04216,ko04217,ko04218,ko04621,ko04979,ko05012,ko05016,ko05166,map04020,map04022,map04216,map04217,map04218,map04621,map04979,map05012,map05016,map05166	-	-	-	ko00000,ko00001,ko02000,ko03029	1.B.8.1	-	-	Porin_3
Gene.97091::LRWT_f2p0_1393_transcript50405_g16::g.97091::m.97091	71139.XP_010066951.1	2.49e-156	444.0	KOG3126@1|root,KOG3126@2759|Eukaryota,37II4@33090|Viridiplantae,3GBJ6@35493|Streptophyta	35493|Streptophyta	P	Mitochondrial outer membrane protein porin	-	GO:0003674,GO:0005215,GO:0005216,GO:0005244,GO:0005253,GO:0005575,GO:0005622,GO:0005623,GO:0005737,GO:0005739,GO:0005740,GO:0005741,GO:0006810,GO:0006811,GO:0006820,GO:0008150,GO:0008308,GO:0008509,GO:0009526,GO:0009527,GO:0009536,GO:0015075,GO:0015103,GO:0015267,GO:0015318,GO:0015698,GO:0016020,GO:0016021,GO:0019867,GO:0022803,GO:0022832,GO:0022836,GO:0022838,GO:0022839,GO:0022857,GO:0031090,GO:…	-	ko:K15040	ko04020,ko04022,ko04216,ko04217,ko04218,ko04621,ko04979,ko05012,ko05016,ko05166,map04020,map04022,map04216,map04217,map04218,map04621,map04979,map05012,map05016,map05166	-	-	-	ko00000,ko00001,ko02000,ko03029	1.B.8.1	-	-	Porin_3
Gene.62772::LRWT_f67p0_1930_transcript28730_g1::g.62772::m.62772	4432.XP_010244405.1	2.64e-284	786.0	COG0612@1|root,KOG2067@2759|Eukaryota,37KI7@33090|Viridiplantae,3G8AB@35493|Streptophyta	35493|Streptophyta	O	Belongs to the peptidase M16 family	-	GO:0000166,GO:0003674,GO:0003824,GO:0004175,GO:0004222,GO:0005488,GO:0005524,GO:0005575,GO:0005622,GO:0005623,GO:0005737,GO:0005739,GO:0005740,GO:0005741,GO:0005743,GO:0005746,GO:0005750,GO:0005758,GO:0005759,GO:0005773,GO:0005774,GO:0006508,GO:0006605,GO:0006626,GO:0006627,GO:0006807,GO:0006810,GO:0006839,GO:0006886,GO:0006950,GO:0006970,GO:0006996,GO:0007005,GO:0008104,GO:0008144,GO:0008150,GO:…	3.4.24.64	ko:K01412,ko:K21767	-	-	-	-	ko00000,ko01000,ko01002,ko03029,ko04812	-	-	-	Peptidase_M16,Peptidase_M16_C
Gene.130606::LRWT_f16p0_743_transcript76228_g1::g.130606::m.130606	218851.Aquca_009_00771.1	2.2e-42	145.0	2BI6D@1|root,2S1DK@2759|Eukaryota,37V8C@33090|Viridiplantae,3GJV3@35493|Streptophyta	35493|Streptophyta	S	MLP-like protein	-	-	-	-	-	-	-	-	-	-	-	-	Bet_v_1
Gene.102205::LRWT_f2p0_1298_transcript53995_g14::g.102205::m.102205	218851.Aquca_006_00233.1	3.58e-156	437.0	KOG0440@1|root,KOG0440@2759|Eukaryota,37I90@33090|Viridiplantae,3GFUF@35493|Streptophyta	35493|Streptophyta	D	MOB kinase activator-like	-	-	-	ko:K06685	ko04111,ko04390,ko04391,ko04392,map04111,map04390,map04391,map04392	M00683	-	-	ko00000,ko00001,ko00002	-	-	-	Mob1_phocein
Gene.81609::LRWT_f94p0_1604_transcript40191_g1::g.81609::m.81609	3694.POPTR_0006s11570.1	1.47e-261	723.0	COG0446@1|root,KOG1336@2759|Eukaryota,37KJ9@33090|Viridiplantae,3GC51@35493|Streptophyta,4JGH2@91835|fabids	35493|Streptophyta	S	Monodehydroascorbate	-	GO:0001101,GO:0003674,GO:0003824,GO:0005575,GO:0005622,GO:0005623,GO:0005737,GO:0005777,GO:0005778,GO:0005829,GO:0006950,GO:0006970,GO:0008150,GO:0008152,GO:0009056,GO:0009414,GO:0009415,GO:0009507,GO:0009526,GO:0009532,GO:0009536,GO:0009570,GO:0009605,GO:0009607,GO:0009608,GO:0009610,GO:0009620,GO:0009628,GO:0009636,GO:0009651,GO:0009719,GO:0009725,GO:0009753,GO:0009941,GO:0009987,GO:0010033,GO:…	1.6.5.4	ko:K08232	ko00053,ko01100,map00053,map01100	-	R00095	-	ko00000,ko00001,ko01000	-	-	-	Pyr_redox_2
Gene.104228::LRWT_f14p0_1223_transcript55438_g1::g.104228::m.104228	218851.Aquca_014_00941.1	1.28e-140	406.0	28IZK@1|root,2QRBC@2759|Eukaryota,37RM6@33090|Viridiplantae,3G7WI@35493|Streptophyta	35493|Streptophyta	K	(NAC) domain-containing protein	-	GO:0003674,GO:0003676,GO:0003677,GO:0005488,GO:0005515,GO:0006355,GO:0008150,GO:0009889,GO:0010468,GO:0010556,GO:0019219,GO:0019222,GO:0031323,GO:0031326,GO:0042802,GO:0042803,GO:0043565,GO:0046983,GO:0047484,GO:0048518,GO:0048583,GO:0048584,GO:0050789,GO:0050794,GO:0051171,GO:0051252,GO:0060255,GO:0065007,GO:0080090,GO:0080134,GO:0097159,GO:1901000,GO:1901002,GO:1901363,GO:1902584,GO:1903506,GO:…	-	-	-	-	-	-	-	-	-	-	NAM
Gene.105195::LRWT_f8p0_1222_transcript56138_g1::g.105195::m.105195	4432.XP_010246318.1	6.23e-168	473.0	COG1905@1|root,KOG3196@2759|Eukaryota,37PIM@33090|Viridiplantae,3GFY3@35493|Streptophyta	35493|Streptophyta	C	NADH dehydrogenase ubiquinone flavoprotein 2	-	GO:0003674,GO:0003824,GO:0003954,GO:0005488,GO:0005575,GO:0005622,GO:0005623,GO:0005737,GO:0005739,GO:0005740,GO:0005743,GO:0005746,GO:0005747,GO:0006091,GO:0006119,GO:0006120,GO:0006139,GO:0006163,GO:0006725,GO:0006753,GO:0006793,GO:0006796,GO:0006807,GO:0006950,GO:0006979,GO:0008137,GO:0008150,GO:0008152,GO:0008270,GO:0009117,GO:0009123,GO:0009126,GO:0009141,GO:0009144,GO:0009150,GO:0009161,GO:…	1.6.5.3,1.6.99.3	ko:K03943	ko00190,ko01100,ko04714,ko04723,ko04932,ko05010,ko05012,ko05016,map00190,map01100,map04714,map04723,map04932,map05010,map05012,map05016	M00143	R11945	RC00061	ko00000,ko00001,ko00002,ko01000	3.D.1.6	-	-	2Fe-2S_thioredx
Gene.43364::LRWT_f15p0_2603_transcript18091_g1::g.43364::m.43364	218851.Aquca_002_01273.1	0.0	1373.0	COG1034@1|root,KOG2282@2759|Eukaryota,37RAU@33090|Viridiplantae,3GFDF@35493|Streptophyta	35493|Streptophyta	C	Belongs to the complex I 75 kDa subunit family	-	GO:0003674,GO:0003824,GO:0003954,GO:0005488,GO:0005575,GO:0005622,GO:0005623,GO:0005737,GO:0005739,GO:0005740,GO:0005743,GO:0005746,GO:0005747,GO:0006091,GO:0006950,GO:0006979,GO:0008137,GO:0008150,GO:0008152,GO:0009507,GO:0009536,GO:0009853,GO:0009987,GO:0015980,GO:0016020,GO:0016491,GO:0016651,GO:0016655,GO:0019866,GO:0030964,GO:0031090,GO:0031966,GO:0031967,GO:0031975,GO:0032991,GO:0043094,GO:…	1.6.5.3,1.6.99.3	ko:K03934	ko00190,ko01100,ko04714,ko04723,ko04932,ko05010,ko05012,ko05016,map00190,map01100,map04714,map04723,map04932,map05010,map05012,map05016	M00143	R11945	RC00061	ko00000,ko00001,ko00002,ko01000	3.D.1.6	-	-	Fer2_4,Molybdopterin,NADH-G_4Fe-4S_3,NADH_dhqG_C
Gene.54254::LRWT_f2p0_2304_transcript23903_g4::g.54254::m.54254	218851.Aquca_020_00295.1	0.0	1126.0	COG0281@1|root,KOG1257@2759|Eukaryota,37JSE@33090|Viridiplantae,3G98C@35493|Streptophyta	35493|Streptophyta	C	malic enzyme	-	-	1.1.1.40	ko:K00029	ko00620,ko00710,ko01100,ko01120,ko01200,map00620,map00710,map01100,map01120,map01200	M00169,M00172	R00216	RC00105	ko00000,ko00001,ko00002,ko01000	-	-	-	Malic_M,malic
Gene.129347::LRWT_f9p0_767_transcript75113_g2::g.129347::m.129347	29730.Gorai.009G332400.1	1.01e-73	223.0	KOG2104@1|root,KOG2104@2759|Eukaryota,37UGW@33090|Viridiplantae,3GISZ@35493|Streptophyta	35493|Streptophyta	U	nuclear transport factor	-	-	-	-	-	-	-	-	-	-	-	-	NTF2
Gene.54091::LRWT_f2p0_2309_transcript23811_g3::g.54091::m.54091	4432.XP_010249927.1	1.4e-83	284.0	KOG4210@1|root,KOG4210@2759|Eukaryota,37HJM@33090|Viridiplantae,3GEMF@35493|Streptophyta	35493|Streptophyta	A	nucleolin	-	GO:0005575,GO:0005622,GO:0005623,GO:0005634,GO:0005730,GO:0031974,GO:0031981,GO:0043226,GO:0043227,GO:0043228,GO:0043229,GO:0043231,GO:0043232,GO:0043233,GO:0044422,GO:0044424,GO:0044428,GO:0044446,GO:0044464,GO:0070013	-	ko:K11294	ko05130,map05130	-	-	-	ko00000,ko00001,ko03009,ko03036	-	-	-	RRM_1
Gene.89747::LRWT_f3p0_1519_transcript45373_g2::g.89747::m.89747	29760.VIT_09s0002g02330.t01	9.16e-142	417.0	KOG1507@1|root,KOG1507@2759|Eukaryota,37P8A@33090|Viridiplantae,3GEGH@35493|Streptophyta	35493|Streptophyta	BD	Belongs to the nucleosome assembly protein (NAP) family	-	GO:0000724,GO:0000725,GO:0003674,GO:0003682,GO:0005488,GO:0005515,GO:0005575,GO:0005622,GO:0005623,GO:0005634,GO:0005737,GO:0006139,GO:0006259,GO:0006281,GO:0006302,GO:0006310,GO:0006725,GO:0006807,GO:0006950,GO:0006974,GO:0008150,GO:0008152,GO:0009987,GO:0010035,GO:0010038,GO:0033554,GO:0034641,GO:0042221,GO:0042393,GO:0043170,GO:0043226,GO:0043227,GO:0043229,GO:0043231,GO:0044237,GO:0044238,GO:…	-	ko:K11279	-	-	-	-	ko00000,ko03036	-	-	-	NAP
Gene.106779::LRWT_f3p0_1215_transcript57276_g7::g.106779::m.106779	218851.Aquca_058_00052.1	1.44e-118	347.0	COG1949@1|root,KOG3242@2759|Eukaryota,37NEQ@33090|Viridiplantae,3GAGE@35493|Streptophyta	35493|Streptophyta	A	3'-5'-exoribonuclease activity	-	GO:0000175,GO:0003674,GO:0003824,GO:0004518,GO:0004527,GO:0004532,GO:0004540,GO:0005575,GO:0005622,GO:0005623,GO:0005737,GO:0005739,GO:0006139,GO:0006725,GO:0006807,GO:0008150,GO:0008152,GO:0008408,GO:0009987,GO:0016070,GO:0016787,GO:0016788,GO:0016796,GO:0016896,GO:0034641,GO:0043170,GO:0043226,GO:0043227,GO:0043229,GO:0043231,GO:0044237,GO:0044238,GO:0044424,GO:0044444,GO:0044464,GO:0046483,GO:…	-	ko:K13288	ko03008,map03008	-	-	-	ko00000,ko00001,ko01000,ko03009,ko03019	-	-	-	RNase_T
Gene.128666::LRWT_f5p0_807_transcript74522_g2::g.128666::m.128666	218851.Aquca_003_00631.1	1.54e-56	181.0	29YBJ@1|root,2RXTQ@2759|Eukaryota,37U6W@33090|Viridiplantae,3GJ8W@35493|Streptophyta	35493|Streptophyta	J	Belongs to the BetVI family	-	-	-	-	-	-	-	-	-	-	-	-	Bet_v_1
Gene.129501::LRWT_f172p0_714_transcript75235_g1::g.129501::m.129501	218851.Aquca_017_00603.1	3.2e-125	357.0	COG3979@1|root,KOG4742@2759|Eukaryota,37RED@33090|Viridiplantae,3G896@35493|Streptophyta	35493|Streptophyta	S	hel,pr-4,pr4	-	GO:0002376,GO:0003674,GO:0003824,GO:0004518,GO:0004540,GO:0005488,GO:0006139,GO:0006725,GO:0006807,GO:0006950,GO:0006952,GO:0006955,GO:0006970,GO:0008061,GO:0008144,GO:0008150,GO:0008152,GO:0009605,GO:0009607,GO:0009615,GO:0009620,GO:0009627,GO:0009628,GO:0009651,GO:0009719,GO:0009723,GO:0009725,GO:0009814,GO:0009817,GO:0009987,GO:0010033,GO:0016070,GO:0016787,GO:0016788,GO:0034641,GO:0042221,GO:…	-	-	-	-	-	-	-	-	-	-	Barwin,Chitin_bind_1
Gene.134482::LRWT_f11p0_674_transcript79709_g1::g.134482::m.134482	218851.Aquca_003_00631.1	3.8e-57	182.0	29YBJ@1|root,2RXTQ@2759|Eukaryota,37U6W@33090|Viridiplantae,3GJ8W@35493|Streptophyta	35493|Streptophyta	J	Belongs to the BetVI family	-	-	-	-	-	-	-	-	-	-	-	-	Bet_v_1
Gene.122592::LRWT_f3p0_915_transcript69387_g3::g.122592::m.122592	218851.Aquca_007_00211.1	1.63e-111	327.0	28JGX@1|root,2QRW1@2759|Eukaryota,37SIG@33090|Viridiplantae,3GCR9@35493|Streptophyta	35493|Streptophyta	S	Pathogen-related protein-like	-	-	-	-	-	-	-	-	-	-	-	-	-
Gene.68355::LRWT_f6p0_1912_transcript32045_g2::g.68355::m.68355	218851.Aquca_012_00135.1	8.71e-270	754.0	COG4677@1|root,2QRD0@2759|Eukaryota,37SGW@33090|Viridiplantae,3G75H@35493|Streptophyta	35493|Streptophyta	G	pectinesterase	-	-	3.1.1.11	ko:K01051	ko00040,ko01100,map00040,map01100	M00081	R02362	RC00460,RC00461	ko00000,ko00001,ko00002,ko01000	-	-	-	PMEI,Pectinesterase
Gene.73254::LRWT_f5p0_1745_transcript34990_g1::g.73254::m.73254	3983.cassava4.1_022381m	2.93e-251	704.0	COG4677@1|root,2QSQ4@2759|Eukaryota,37NN8@33090|Viridiplantae,3GC28@35493|Streptophyta,4JGWQ@91835|fabids	35493|Streptophyta	G	Acts in the modification of cell walls via demethylesterification of cell wall pectin	-	GO:0003674,GO:0003824,GO:0004857,GO:0005575,GO:0005623,GO:0006950,GO:0006952,GO:0008150,GO:0009605,GO:0009607,GO:0009617,GO:0009620,GO:0016020,GO:0016787,GO:0016788,GO:0030234,GO:0030599,GO:0042742,GO:0043086,GO:0043207,GO:0044092,GO:0044464,GO:0046910,GO:0050790,GO:0050829,GO:0050896,GO:0051704,GO:0051707,GO:0052689,GO:0065007,GO:0065009,GO:0071944,GO:0098542,GO:0098772	3.1.1.11	ko:K01051	ko00040,ko01100,map00040,map01100	M00081	R02362	RC00460,RC00461	ko00000,ko00001,ko00002,ko01000	-	-	-	PMEI,Pectinesterase
Gene.65481::LRWT_f4p0_1984_transcript30343_g1::g.65481::m.65481	218851.Aquca_003_00671.1	2.19e-248	700.0	COG4677@1|root,2QUB9@2759|Eukaryota,37KQB@33090|Viridiplantae,3GEH0@35493|Streptophyta	35493|Streptophyta	G	pectinesterase pectinesterase inhibitor	-	-	3.1.1.11	ko:K01051	ko00040,ko01100,map00040,map01100	M00081	R02362	RC00460,RC00461	ko00000,ko00001,ko00002,ko01000	-	-	-	PMEI,Pectinesterase
Gene.96205::LRWT_f4p0_1320_transcript49792_g1::g.96205::m.96205	218851.Aquca_023_00178.1	5.9e-178	504.0	2C0PQ@1|root,2QT8W@2759|Eukaryota,37QSI@33090|Viridiplantae,3GBJG@35493|Streptophyta	35493|Streptophyta	Q	Belongs to the peroxidase family. Classical plant (class III) peroxidase subfamily	-	GO:0003674,GO:0003824,GO:0004601,GO:0005575,GO:0005618,GO:0005622,GO:0005623,GO:0005737,GO:0005773,GO:0005911,GO:0008150,GO:0008152,GO:0009505,GO:0009506,GO:0009636,GO:0009664,GO:0009987,GO:0016020,GO:0016043,GO:0016209,GO:0016491,GO:0016684,GO:0030054,GO:0030312,GO:0042221,GO:0043226,GO:0043227,GO:0043229,GO:0043231,GO:0044424,GO:0044444,GO:0044464,GO:0045229,GO:0050896,GO:0051716,GO:0055044,GO:…	1.11.1.7	ko:K00430	ko00940,ko01100,ko01110,map00940,map01100,map01110	-	R00602,R02596,R03919,R04007,R07443	RC00034	ko00000,ko00001,ko01000	-	-	-	peroxidase
Gene.46569::LRWT_f172p0_2459_transcript19759_g1::g.46569::m.46569	218851.Aquca_001_00410.1	0.0	1163.0	COG1024@1|root,KOG1683@2759|Eukaryota,37P5F@33090|Viridiplantae,3GCRX@35493|Streptophyta	35493|Streptophyta	I	Belongs to the enoyl-CoA hydratase isomerase family	-	GO:0003674,GO:0003676,GO:0003723,GO:0003729,GO:0003824,GO:0003857,GO:0004165,GO:0004300,GO:0005488,GO:0005515,GO:0005575,GO:0005622,GO:0005623,GO:0005737,GO:0005777,GO:0006082,GO:0006629,GO:0006631,GO:0006635,GO:0008017,GO:0008092,GO:0008150,GO:0008152,GO:0008692,GO:0009056,GO:0009062,GO:0009987,GO:0015631,GO:0016042,GO:0016054,GO:0016491,GO:0016614,GO:0016616,GO:0016829,GO:0016835,GO:0016836,GO:…	1.1.1.211,1.1.1.35,4.2.1.17	ko:K10527	ko00071,ko00592,ko01100,ko01110,ko01212,map00071,map00592,map01100,map01110,map01212	M00087,M00113	R01975,R03026,R04170,R04737,R04738,R04739,R04740,R04741,R04743,R04744,R04745,R04746,R04748,R04749,R07889,R07890,R07893,R07894,R07897,R07898	RC00029,RC00117,RC00831,RC01095	ko00000,ko00001,ko00002,ko01000	-	-	-	3HCDH,3HCDH_N,ECH_1
Gene.106598::LRWT_f4p0_1166_transcript57143_g1::g.106598::m.106598	218851.Aquca_017_00408.1	3.61e-150	431.0	COG0384@1|root,KOG3033@2759|Eukaryota,37R5F@33090|Viridiplantae,3GCZZ@35493|Streptophyta	35493|Streptophyta	L	Phenazine biosynthesis-like domain-containing protein	-	-	-	-	-	-	-	-	-	-	-	-	PhzC-PhzF
Gene.85276::LRWT_f5p0_1596_transcript42505_g3::g.85276::m.85276	218851.Aquca_008_00032.1	6.1e-176	509.0	2CMBZ@1|root,2QPXT@2759|Eukaryota,37NH3@33090|Viridiplantae,3G7NW@35493|Streptophyta	35493|Streptophyta	S	phenolic glucoside malonyltransferase	-	GO:0003674,GO:0003824,GO:0016740,GO:0016746,GO:0016747,GO:0033809	-	-	-	-	-	-	-	-	-	-	Transferase
Gene.48509::LRWT_f77p0_2398_transcript20785_g1::g.48509::m.48509	218851.Aquca_030_00132.1	0.0	1237.0	COG2986@1|root,KOG0222@2759|Eukaryota,37M4G@33090|Viridiplantae,3G9T5@35493|Streptophyta	35493|Streptophyta	Q	Phenylalanine ammonialyase	PAL	GO:0001101,GO:0003674,GO:0003824,GO:0006464,GO:0006508,GO:0006511,GO:0006725,GO:0006807,GO:0008150,GO:0008152,GO:0009056,GO:0009057,GO:0009058,GO:0009636,GO:0009698,GO:0009699,GO:0009719,GO:0009725,GO:0009739,GO:0009987,GO:0010033,GO:0010243,GO:0014070,GO:0016598,GO:0016829,GO:0016840,GO:0016841,GO:0019438,GO:0019538,GO:0019748,GO:0019941,GO:0030163,GO:0033993,GO:0036211,GO:0042221,GO:0042493,GO:…	4.3.1.24,4.3.1.25	ko:K10775,ko:K13064	ko00360,ko00940,ko01100,ko01110,map00360,map00940,map01100,map01110	M00039,M00137,M00350	R00697,R00737	RC00361	ko00000,ko00001,ko00002,ko01000	-	-	-	Lyase_aromatic
Gene.69610::LRWT_f5p0_1787_transcript32811_g1::g.69610::m.69610	218851.Aquca_010_00153.1	3.48e-219	615.0	COG3200@1|root,2QPP7@2759|Eukaryota,37JFZ@33090|Viridiplantae,3GDPA@35493|Streptophyta	35493|Streptophyta	E	Phospho-2-dehydro-3-deoxyheptonate aldolase	-	GO:0005575,GO:0005622,GO:0005623,GO:0005737,GO:0009507,GO:0009536,GO:0043226,GO:0043227,GO:0043229,GO:0043231,GO:0044424,GO:0044444,GO:0044464	2.5.1.54	ko:K01626	ko00400,ko01100,ko01110,ko01130,ko01230,ko02024,map00400,map01100,map01110,map01130,map01230,map02024	M00022	R01826	RC00435	ko00000,ko00001,ko00002,ko01000	-	-	-	DAHP_synth_2
Gene.66042::LRWT_f102p0_1800_transcript30671_g1::g.66042::m.66042	218851.Aquca_023_00019.1	9.2e-315	866.0	COG3200@1|root,2QPP7@2759|Eukaryota,37QJK@33090|Viridiplantae,3GBEX@35493|Streptophyta	35493|Streptophyta	E	Phospho-2-dehydro-3-deoxyheptonate aldolase	-	-	2.5.1.54	ko:K01626	ko00400,ko01100,ko01110,ko01130,ko01230,ko02024,map00400,map01100,map01110,map01130,map01230,map02024	M00022	R01826	RC00435	ko00000,ko00001,ko00002,ko01000	-	-	-	DAHP_synth_2
Gene.86646::LRWT_f9p0_1494_transcript43376_g1::g.86646::m.86646	218851.Aquca_014_00578.1	4.29e-205	572.0	COG0588@1|root,KOG0235@2759|Eukaryota,37IRX@33090|Viridiplantae,3GCPQ@35493|Streptophyta	35493|Streptophyta	G	phosphoglycerate	-	-	5.4.2.11	ko:K01834	ko00010,ko00260,ko00680,ko01100,ko01110,ko01120,ko01130,ko01200,ko01230,ko04922,ko05230,map00010,map00260,map00680,map01100,map01110,map01120,map01130,map01200,map01230,map04922,map05230	M00001,M00002,M00003	R01518	RC00536	ko00000,ko00001,ko00002,ko01000,ko04131,ko04147	-	-	-	His_Phos_1
Gene.69225::LRWT_f14p0_1899_transcript32578_g1::g.69225::m.69225	218851.Aquca_091_00025.1	0.0	911.0	COG0500@1|root,KOG1269@2759|Eukaryota,37MW5@33090|Viridiplantae,3G8XR@35493|Streptophyta	35493|Streptophyta	I	phosphoethanolamine N-methyltransferase	-	GO:0000003,GO:0000902,GO:0000904,GO:0001505,GO:0003006,GO:0003674,GO:0003824,GO:0005575,GO:0005622,GO:0005623,GO:0005737,GO:0005829,GO:0006576,GO:0006629,GO:0006644,GO:0006650,GO:0006656,GO:0006793,GO:0006796,GO:0006807,GO:0006935,GO:0007275,GO:0008150,GO:0008152,GO:0008168,GO:0008170,GO:0008610,GO:0008654,GO:0008757,GO:0009058,GO:0009308,GO:0009309,GO:0009555,GO:0009605,GO:0009653,GO:0009791,GO:…	2.1.1.103	ko:K05929	ko00564,map00564	-	R02037,R06868,R06869	RC00003,RC00060,RC00181,RC00496	ko00000,ko00001,ko01000	-	-	-	Methyltransf_11,Methyltransf_25,Methyltransf_31
Gene.91586::LRWT_f3p0_1489_transcript46606_g4::g.91586::m.91586	218851.Aquca_053_00030.1	8.11e-52	176.0	KOG2945@1|root,KOG2945@2759|Eukaryota,37K0R@33090|Viridiplantae,3GCWE@35493|Streptophyta	35493|Streptophyta	S	Plasminogen activator inhibitor 1 RNA-binding	-	-	-	ko:K13199	-	-	-	-	ko00000,ko03041	-	-	-	HABP4_PAI-RBP1,Stm1_N
Gene.91584::LRWT_f3p0_1489_transcript46606_g4::g.91584::m.91584	4432.XP_010275458.1	2.99e-28	115.0	KOG2945@1|root,KOG2945@2759|Eukaryota,37K0R@33090|Viridiplantae,3GCWE@35493|Streptophyta	35493|Streptophyta	S	Plasminogen activator inhibitor 1 RNA-binding	-	-	-	ko:K13199	-	-	-	-	ko00000,ko03041	-	-	-	HABP4_PAI-RBP1,Stm1_N
Gene.5872::LRWT_f3p0_4885_transcript1704_g1::g.5872::m.5872	218851.Aquca_001_00686.1	0.0	2397.0	COG1131@1|root,KOG0065@2759|Eukaryota,37P62@33090|Viridiplantae,3GB0P@35493|Streptophyta	33090|Viridiplantae	Q	Belongs to the ABC transporter superfamily. ABCG family. PDR (TC 3.A.1.205) subfamily	-	-	-	-	-	-	-	-	-	-	-	-	ABC2_membrane,ABC_tran,ABC_trans_N,PDR_assoc
Gene.76461::LRWT_f6p0_1744_transcript36963_g1::g.76461::m.76461	161934.XP_010694241.1	0.0	884.0	COG5272@1|root,KOG0001@2759|Eukaryota,37K87@33090|Viridiplantae,3G7XW@35493|Streptophyta	35493|Streptophyta	O	Ubiquitin exists either covalently attached to another protein, or free (unanchored). When covalently bound, it is conjugated to target proteins via an isopeptide bond either as a monomer (monoubiquitin), a polymer linked via different Lys residues of the ubiquitin (polyubiquitin chains) or a linear polymer linked via the initiator Met of the ubiquitin (linear polyubiquitin chains). Polyubiquitin…	-	GO:0001101,GO:0006464,GO:0006807,GO:0008150,GO:0008152,GO:0009719,GO:0009725,GO:0009751,GO:0009987,GO:0010033,GO:0014070,GO:0019538,GO:0036211,GO:0042221,GO:0042493,GO:0043170,GO:0043412,GO:0044237,GO:0044238,GO:0044260,GO:0044267,GO:0046677,GO:0050896,GO:0071704,GO:1901564,GO:1901700	-	ko:K08770	ko03320,map03320	-	-	-	ko00000,ko00001,ko04121	-	-	-	ubiquitin
Gene.121893::LRWT_f2p0_933_transcript68826_g15::g.121893::m.121893	218851.Aquca_013_00353.1	9.15e-129	370.0	KOG1619@1|root,KOG1619@2759|Eukaryota,37K2I@33090|Viridiplantae,3G7R3@35493|Streptophyta	35493|Streptophyta	C	transmembrane ascorbate ferrireductase	-	GO:0003674,GO:0003824,GO:0005488,GO:0005515,GO:0005575,GO:0005622,GO:0005623,GO:0005737,GO:0005773,GO:0008150,GO:0008152,GO:0009507,GO:0009536,GO:0016491,GO:0019904,GO:0043226,GO:0043227,GO:0043229,GO:0043231,GO:0044424,GO:0044444,GO:0044464,GO:0055114	1.16.5.1	ko:K08360	-	-	-	-	ko00000,ko01000,ko02000	5.B.2.1	-	-	Cytochrom_B561
Gene.112328::LRWT_f5p0_1076_transcript61351_g2::g.112328::m.112328	3988.XP_002532180.1	2.24e-123	359.0	2CMT9@1|root,2QRUU@2759|Eukaryota,37QAI@33090|Viridiplantae,3GC0F@35493|Streptophyta,4JN84@91835|fabids	35493|Streptophyta	S	ATP synthase 24 kDa subunit	-	GO:0003674,GO:0005488,GO:0005507,GO:0005575,GO:0005622,GO:0005623,GO:0005634,GO:0005730,GO:0005737,GO:0005739,GO:0005740,GO:0005743,GO:0005753,GO:0007275,GO:0008150,GO:0008270,GO:0009507,GO:0009536,GO:0009555,GO:0016020,GO:0016469,GO:0019866,GO:0031090,GO:0031966,GO:0031967,GO:0031974,GO:0031975,GO:0031981,GO:0032501,GO:0032502,GO:0032991,GO:0043167,GO:0043169,GO:0043226,GO:0043227,GO:0043228,GO:…	-	-	-	-	-	-	-	-	-	-	Mt_ATP_synt
Gene.69871::LRWT_f7p0_1868_transcript32960_g1::g.69871::m.69871	4432.XP_010259364.1	0.0	881.0	COG0612@1|root,KOG0960@2759|Eukaryota,37QB0@33090|Viridiplantae,3GBE3@35493|Streptophyta	35493|Streptophyta	O	Belongs to the peptidase M16 family	-	GO:0003674,GO:0003824,GO:0004175,GO:0004222,GO:0005488,GO:0005575,GO:0005618,GO:0005622,GO:0005623,GO:0005634,GO:0005730,GO:0005737,GO:0005739,GO:0005740,GO:0005741,GO:0005743,GO:0005746,GO:0005750,GO:0005758,GO:0005759,GO:0005773,GO:0005774,GO:0006091,GO:0006119,GO:0006122,GO:0006139,GO:0006163,GO:0006508,GO:0006725,GO:0006753,GO:0006793,GO:0006796,GO:0006807,GO:0008150,GO:0008152,GO:0008233,GO:…	3.4.24.64	ko:K17732	-	-	-	-	ko00000,ko01000,ko01002,ko03029	-	-	-	Peptidase_M16,Peptidase_M16_C
Gene.56188::LRWT_f3p0_2238_transcript24981_g1::g.56188::m.56188	218851.Aquca_002_00143.1	1.75e-310	858.0	KOG2501@1|root,KOG2501@2759|Eukaryota,37JND@33090|Viridiplantae,3GDD8@35493|Streptophyta	35493|Streptophyta	O	Nucleoredoxin	-	GO:0000003,GO:0000902,GO:0000904,GO:0001558,GO:0003006,GO:0003674,GO:0003824,GO:0004791,GO:0005575,GO:0005622,GO:0005623,GO:0005737,GO:0005829,GO:0006935,GO:0008150,GO:0008152,GO:0009605,GO:0009636,GO:0009653,GO:0009826,GO:0009856,GO:0009860,GO:0009932,GO:0009987,GO:0010035,GO:0010038,GO:0010183,GO:0010769,GO:0015036,GO:0016043,GO:0016049,GO:0016209,GO:0016491,GO:0016651,GO:0016667,GO:0016668,GO:…	1.8.1.8	ko:K17609	-	-	-	-	ko00000,ko01000,ko01009	-	-	-	C1_2,Thioredoxin_8
Gene.121738::LRWT_f3p0_926_transcript68704_g2::g.121738::m.121738	4432.XP_010255410.1	3.16e-107	310.0	COG0386@1|root,KOG1651@2759|Eukaryota,37IT1@33090|Viridiplantae,3GE5K@35493|Streptophyta	35493|Streptophyta	O	Belongs to the glutathione peroxidase family	-	GO:0003674,GO:0003824,GO:0004601,GO:0004602,GO:0005575,GO:0005576,GO:0005622,GO:0005623,GO:0005737,GO:0005739,GO:0005829,GO:0005886,GO:0006950,GO:0006970,GO:0008150,GO:0008152,GO:0009507,GO:0009536,GO:0009628,GO:0009636,GO:0009651,GO:0009987,GO:0010035,GO:0010038,GO:0016020,GO:0016209,GO:0016491,GO:0016684,GO:0042221,GO:0043226,GO:0043227,GO:0043229,GO:0043231,GO:0044424,GO:0044444,GO:0044464,GO:…	1.11.1.9	ko:K00432	ko00480,ko00590,ko04918,map00480,map00590,map04918	-	R00274,R07034,R07035	RC00011,RC00982	ko00000,ko00001,ko01000	-	-	-	GSHPx
Gene.92017::LRWT_f10p0_1436_transcript46903_g1::g.92017::m.92017	4432.XP_010268045.1	4.81e-218	607.0	COG0526@1|root,KOG0191@2759|Eukaryota,37NZK@33090|Viridiplantae,3GGAI@35493|Streptophyta	35493|Streptophyta	O	Belongs to the protein disulfide isomerase family	-	GO:0003674,GO:0003756,GO:0003824,GO:0005575,GO:0005622,GO:0005623,GO:0005737,GO:0005783,GO:0006457,GO:0006950,GO:0008150,GO:0009987,GO:0012505,GO:0016853,GO:0016860,GO:0016864,GO:0033554,GO:0034976,GO:0043226,GO:0043227,GO:0043229,GO:0043231,GO:0044424,GO:0044444,GO:0044464,GO:0050896,GO:0051716,GO:0140096	5.3.4.1	ko:K09584	ko04141,map04141	-	-	-	ko00000,ko00001,ko01000,ko03110,ko04131	-	-	-	ERp29,Thioredoxin
Gene.88834::LRWT_f12p0_1464_transcript44781_g1::g.88834::m.88834	218851.Aquca_035_00061.1	2.84e-212	591.0	COG0074@1|root,KOG1255@2759|Eukaryota,37I24@33090|Viridiplantae,3G8BF@35493|Streptophyta	35493|Streptophyta	C	Succinyl-CoA synthetase functions in the citric acid cycle (TCA), coupling the hydrolysis of succinyl-CoA to the synthesis of ATP and thus represents the only step of substrate- level phosphorylation in the TCA. The alpha subunit of the enzyme binds the substrates coenzyme A and phosphate, while succinate binding and nucleotide specificity is provided by the beta subunit	-	GO:0003674,GO:0003824,GO:0004774,GO:0004775,GO:0004776,GO:0005575,GO:0005622,GO:0005623,GO:0005737,GO:0005739,GO:0005759,GO:0006082,GO:0006091,GO:0006099,GO:0006101,GO:0006104,GO:0006105,GO:0006139,GO:0006163,GO:0006637,GO:0006725,GO:0006732,GO:0006753,GO:0006790,GO:0006793,GO:0006796,GO:0006807,GO:0008150,GO:0008152,GO:0009060,GO:0009117,GO:0009150,GO:0009259,GO:0009987,GO:0015980,GO:0016874,GO:…	6.2.1.4,6.2.1.5	ko:K01899	ko00020,ko00640,ko01100,ko01110,ko01120,ko01130,ko01200,map00020,map00640,map01100,map01110,map01120,map01130,map01200	M00009,M00011	R00432,R00727	RC00004,RC00014	ko00000,ko00001,ko00002,ko01000	-	-	-	CoA_binding,Ligase_CoA
Gene.83908::LRWT_f2p0_1624_transcript41641_g5::g.83908::m.83908	4432.XP_010265215.1	3.09e-156	460.0	KOG1339@1|root,KOG1339@2759|Eukaryota,37K0Y@33090|Viridiplantae,3GB91@35493|Streptophyta	33090|Viridiplantae	O	Belongs to the peptidase A1 family	-	-	-	-	-	-	-	-	-	-	-	-	TAXi_C,TAXi_N
Gene.65962::LRWT_f5p0_1952_transcript30621_g1::g.65962::m.65962	218851.Aquca_014_00244.1	1.4e-303	835.0	COG0526@1|root,KOG0190@2759|Eukaryota,37R3F@33090|Viridiplantae,3GCU7@35493|Streptophyta	35493|Streptophyta	O	disulfide-isomerase	PDIL1-1	GO:0000003,GO:0000322,GO:0000323,GO:0000325,GO:0000326,GO:0000327,GO:0003006,GO:0003674,GO:0003756,GO:0003824,GO:0005575,GO:0005618,GO:0005622,GO:0005623,GO:0005737,GO:0005773,GO:0005774,GO:0005783,GO:0005788,GO:0005794,GO:0005886,GO:0006457,GO:0006950,GO:0006970,GO:0007275,GO:0008150,GO:0009314,GO:0009416,GO:0009505,GO:0009507,GO:0009532,GO:0009536,GO:0009570,GO:0009579,GO:0009628,GO:0009642,GO:…	5.3.4.1	ko:K09580	ko04141,map04141	-	-	-	ko00000,ko00001,ko01000,ko03110,ko04131,ko04147	-	-	-	Thioredoxin,Thioredoxin_6
Gene.125968::LRWT_f2p0_856_transcript72154_g10::g.125968::m.125968	218851.Aquca_076_00047.1	1.65e-63	202.0	2DW8E@1|root,2S6PU@2759|Eukaryota,37VY3@33090|Viridiplantae,3GK5C@35493|Streptophyta	35493|Streptophyta	S	TIFY 10B-like	-	GO:0003674,GO:0003712,GO:0003714,GO:0005575,GO:0005622,GO:0005623,GO:0005634,GO:0006950,GO:0008150,GO:0009611,GO:0009889,GO:0009890,GO:0009892,GO:0009966,GO:0010556,GO:0010558,GO:0010605,GO:0010646,GO:0019219,GO:0019222,GO:0023051,GO:0031323,GO:0031324,GO:0031326,GO:0031327,GO:0031347,GO:0043226,GO:0043227,GO:0043229,GO:0043231,GO:0044424,GO:0044464,GO:0045934,GO:0048519,GO:0048523,GO:0048583,GO:…	-	ko:K13464	ko04075,map04075	-	-	-	ko00000,ko00001	-	-	-	CCT_2,tify
Gene.117135::LRWT_f82p0_968_transcript65043_g1::g.117135::m.117135	218851.Aquca_076_00047.1	2.28e-51	172.0	2DW8E@1|root,2S6PU@2759|Eukaryota,37VY3@33090|Viridiplantae,3GK5C@35493|Streptophyta	35493|Streptophyta	S	TIFY 10B-like	-	GO:0003674,GO:0003712,GO:0003714,GO:0005575,GO:0005622,GO:0005623,GO:0005634,GO:0006950,GO:0008150,GO:0009611,GO:0009889,GO:0009890,GO:0009892,GO:0009966,GO:0010556,GO:0010558,GO:0010605,GO:0010646,GO:0019219,GO:0019222,GO:0023051,GO:0031323,GO:0031324,GO:0031326,GO:0031327,GO:0031347,GO:0043226,GO:0043227,GO:0043229,GO:0043231,GO:0044424,GO:0044464,GO:0045934,GO:0048519,GO:0048523,GO:0048583,GO:…	-	ko:K13464	ko04075,map04075	-	-	-	ko00000,ko00001	-	-	-	CCT_2,tify
Gene.92467::LRWT_f2p0_1468_transcript47202_g6::g.92467::m.92467	218851.Aquca_091_00057.1	1.65e-101	312.0	28PND@1|root,2QWAG@2759|Eukaryota,37QPG@33090|Viridiplantae,3GGWU@35493|Streptophyta	35493|Streptophyta	S	TIFY 6B-like	-	GO:0001101,GO:0003674,GO:0003712,GO:0003714,GO:0005488,GO:0005515,GO:0005575,GO:0005622,GO:0005623,GO:0005634,GO:0006950,GO:0007154,GO:0007165,GO:0008150,GO:0009611,GO:0009719,GO:0009725,GO:0009753,GO:0009755,GO:0009867,GO:0009889,GO:0009890,GO:0009892,GO:0009966,GO:0009987,GO:0010033,GO:0010556,GO:0010558,GO:0010605,GO:0010646,GO:0019219,GO:0019222,GO:0023051,GO:0023052,GO:0031323,GO:0031324,GO:…	-	ko:K13464	ko04075,map04075	-	-	-	ko00000,ko00001	-	-	-	CCT_2,tify
Gene.138274::LRWT_f3p0_635_transcript83412_g3::g.138274::m.138274	3694.POPTR_0307s00210.1	1.13e-37	133.0	COG0534@1|root,KOG1347@2759|Eukaryota,37NRQ@33090|Viridiplantae,3G78Z@35493|Streptophyta,4JHDR@91835|fabids	35493|Streptophyta	V	Belongs to the multi antimicrobial extrusion (MATE) (TC 2.A.66.1) family	-	GO:0003674,GO:0005215,GO:0005575,GO:0005622,GO:0005623,GO:0005737,GO:0005773,GO:0005774,GO:0006810,GO:0006855,GO:0007275,GO:0008150,GO:0009605,GO:0009607,GO:0009624,GO:0009653,GO:0009888,GO:0009987,GO:0010015,GO:0010053,GO:0010054,GO:0015238,GO:0015893,GO:0016020,GO:0016049,GO:0021700,GO:0022622,GO:0022857,GO:0030154,GO:0031090,GO:0032501,GO:0032502,GO:0040007,GO:0042221,GO:0042493,GO:0043207,GO:…	-	ko:K03327	-	-	-	-	ko00000,ko02000	2.A.66.1	-	-	MatE
Gene.59241::LRWT_f2p0_2156_transcript26715_g4::g.59241::m.59241	218851.Aquca_009_00027.1	7.17e-269	746.0	COG0534@1|root,KOG1347@2759|Eukaryota,37KAD@33090|Viridiplantae,3G7E8@35493|Streptophyta	35493|Streptophyta	V	Belongs to the multi antimicrobial extrusion (MATE) (TC 2.A.66.1) family	-	GO:0003674,GO:0005215,GO:0006810,GO:0006855,GO:0008150,GO:0015238,GO:0015893,GO:0022857,GO:0042221,GO:0042493,GO:0050896,GO:0051179,GO:0051234,GO:0055085	-	ko:K03327	-	-	-	-	ko00000,ko02000	2.A.66.1	-	-	MatE
Gene.72977::LRWT_f6p0_1779_transcript34833_g1::g.72977::m.72977	218851.Aquca_011_00531.1	3.78e-234	677.0	COG0534@1|root,KOG1347@2759|Eukaryota,37NRQ@33090|Viridiplantae,3G78Z@35493|Streptophyta	35493|Streptophyta	V	Belongs to the multi antimicrobial extrusion (MATE) (TC 2.A.66.1) family	-	GO:0003674,GO:0005215,GO:0005575,GO:0005622,GO:0005623,GO:0005737,GO:0005773,GO:0005774,GO:0006810,GO:0006855,GO:0007275,GO:0008150,GO:0009605,GO:0009607,GO:0009624,GO:0009653,GO:0009888,GO:0009987,GO:0010015,GO:0010053,GO:0010054,GO:0015238,GO:0015893,GO:0016020,GO:0016049,GO:0021700,GO:0022622,GO:0022857,GO:0030154,GO:0031090,GO:0032501,GO:0032502,GO:0040007,GO:0042221,GO:0042493,GO:0043207,GO:…	-	ko:K03327	-	-	-	-	ko00000,ko02000	2.A.66.1	-	-	MatE
Gene.71484::LRWT_f5p0_1850_transcript33943_g3::g.71484::m.71484	218851.Aquca_011_00531.1	1.21e-244	705.0	COG0534@1|root,KOG1347@2759|Eukaryota,37NRQ@33090|Viridiplantae,3G78Z@35493|Streptophyta	35493|Streptophyta	V	Belongs to the multi antimicrobial extrusion (MATE) (TC 2.A.66.1) family	-	GO:0003674,GO:0005215,GO:0005575,GO:0005622,GO:0005623,GO:0005737,GO:0005773,GO:0005774,GO:0006810,GO:0006855,GO:0007275,GO:0008150,GO:0009605,GO:0009607,GO:0009624,GO:0009653,GO:0009888,GO:0009987,GO:0010015,GO:0010053,GO:0010054,GO:0015238,GO:0015893,GO:0016020,GO:0016049,GO:0021700,GO:0022622,GO:0022857,GO:0030154,GO:0031090,GO:0032501,GO:0032502,GO:0040007,GO:0042221,GO:0042493,GO:0043207,GO:…	-	ko:K03327	-	-	-	-	ko00000,ko02000	2.A.66.1	-	-	MatE
Gene.69127::LRWT_f11p0_1900_transcript32515_g1::g.69127::m.69127	218851.Aquca_021_00152.1	0.0	914.0	COG0201@1|root,KOG1373@2759|Eukaryota,37QKK@33090|Viridiplantae,3G891@35493|Streptophyta	35493|Streptophyta	OU	Belongs to the SecY SEC61-alpha family	-	GO:0003674,GO:0005215,GO:0005575,GO:0005622,GO:0005623,GO:0005737,GO:0005783,GO:0006605,GO:0006612,GO:0006620,GO:0006810,GO:0006886,GO:0008104,GO:0008150,GO:0008320,GO:0008565,GO:0012505,GO:0015031,GO:0015399,GO:0015405,GO:0015450,GO:0015833,GO:0022804,GO:0022857,GO:0022884,GO:0031204,GO:0033036,GO:0033365,GO:0034613,GO:0042886,GO:0042887,GO:0043226,GO:0043227,GO:0043229,GO:0043231,GO:0044424,GO:…	-	ko:K10956	ko03060,ko04141,ko04145,ko05110,map03060,map04141,map04145,map05110	M00401	-	-	ko00000,ko00001,ko00002,ko02044	3.A.5.4,3.A.5.8,3.A.5.9	-	-	Plug_translocon,SecY
Gene.107102::LRWT_f11p0_1187_transcript57511_g2::g.107102::m.107102	218851.Aquca_007_00867.1	4.75e-165	474.0	COG1185@1|root,KOG1520@2759|Eukaryota,37NN3@33090|Viridiplantae,3GEG6@35493|Streptophyta	35493|Streptophyta	L	YLS2-like	YLS2	GO:0001101,GO:0003674,GO:0003824,GO:0005575,GO:0005622,GO:0005623,GO:0005737,GO:0005783,GO:0006950,GO:0008150,GO:0009605,GO:0009607,GO:0009611,GO:0009615,GO:0009620,GO:0009719,GO:0009723,GO:0009725,GO:0009751,GO:0009753,GO:0010033,GO:0012505,GO:0014070,GO:0016020,GO:0016787,GO:0016788,GO:0042221,GO:0042493,GO:0043207,GO:0043226,GO:0043227,GO:0043229,GO:0043231,GO:0044424,GO:0044444,GO:0044464,GO:…	-	-	-	-	-	-	-	-	-	-	Str_synth
Gene.72608::LRWT_f72p0_1777_transcript34624_g1::g.72608::m.72608	218851.Aquca_014_00776.1	6.81e-270	748.0	KOG2615@1|root,KOG2615@2759|Eukaryota,37P1M@33090|Viridiplantae,3GGHM@35493|Streptophyta	35493|Streptophyta	J	Protein ZINC INDUCED	-	GO:0000325,GO:0001101,GO:0003674,GO:0005215,GO:0005575,GO:0005622,GO:0005623,GO:0005737,GO:0005773,GO:0005774,GO:0005886,GO:0006810,GO:0006811,GO:0006812,GO:0006813,GO:0006950,GO:0007275,GO:0008150,GO:0008324,GO:0009414,GO:0009415,GO:0009605,GO:0009606,GO:0009607,GO:0009624,GO:0009628,GO:0009629,GO:0009630,GO:0009705,GO:0009914,GO:0009926,GO:0009987,GO:0010035,GO:0010038,GO:0010043,GO:0010119,GO:…	-	-	-	-	-	-	-	-	-	-	MFS_1
Gene.70303::LRWT_f5p0_1836_transcript33232_g1::g.70303::m.70303	218851.Aquca_007_00912.1	6.6e-253	702.0	COG0814@1|root,KOG1304@2759|Eukaryota,37NP5@33090|Viridiplantae,3GFRZ@35493|Streptophyta	35493|Streptophyta	E	amino acid transporter	-	GO:0003333,GO:0003674,GO:0005215,GO:0005342,GO:0005575,GO:0005622,GO:0005623,GO:0005737,GO:0005773,GO:0005774,GO:0006810,GO:0006811,GO:0006820,GO:0006865,GO:0008150,GO:0008509,GO:0008514,GO:0015075,GO:0015171,GO:0015173,GO:0015175,GO:0015318,GO:0015711,GO:0015801,GO:0015804,GO:0015849,GO:0016020,GO:0022857,GO:0031090,GO:0034220,GO:0043226,GO:0043227,GO:0043229,GO:0043231,GO:0044422,GO:0044424,GO:…	-	ko:K14209	ko04138,map04138	-	-	-	ko00000,ko00001,ko02000,ko04131	2.A.18.8	-	-	Aa_trans
Gene.95332::LRWT_f8p0_1375_transcript49184_g1::g.95332::m.95332	218851.Aquca_034_00332.1	6.51e-249	686.0	COG1902@1|root,KOG0134@2759|Eukaryota,37NVQ@33090|Viridiplantae,3GAWK@35493|Streptophyta	35493|Streptophyta	C	12-oxophytodienoate reductase	OPR2	GO:0003674,GO:0003824,GO:0005575,GO:0005622,GO:0005623,GO:0006082,GO:0006629,GO:0006631,GO:0006633,GO:0006950,GO:0006952,GO:0008150,GO:0008152,GO:0008610,GO:0009058,GO:0009694,GO:0009695,GO:0009987,GO:0010817,GO:0016053,GO:0016491,GO:0016627,GO:0016628,GO:0016629,GO:0019752,GO:0031407,GO:0031408,GO:0032787,GO:0042445,GO:0042446,GO:0043436,GO:0044237,GO:0044238,GO:0044249,GO:0044255,GO:0044281,GO:…	1.3.1.42	ko:K05894	ko00592,ko01100,ko01110,map00592,map01100,map01110	M00113	R03401	RC00921	ko00000,ko00001,ko00002,ko01000	-	-	-	Oxidored_FMN
Gene.118332::LRWT_f2p0_993_transcript66003_g5::g.118332::m.118332	218851.Aquca_020_00170.1	3.68e-78	238.0	KOG3352@1|root,KOG3352@2759|Eukaryota,37UP7@33090|Viridiplantae,3GI0P@35493|Streptophyta	35493|Streptophyta	C	Cytochrome c oxidase subunit	-	GO:0005575,GO:0005622,GO:0005623,GO:0005737,GO:0005739,GO:0005740,GO:0005743,GO:0005746,GO:0005751,GO:0006091,GO:0006119,GO:0006123,GO:0006139,GO:0006163,GO:0006164,GO:0006725,GO:0006753,GO:0006754,GO:0006793,GO:0006796,GO:0006807,GO:0006810,GO:0006811,GO:0006812,GO:0006839,GO:0008150,GO:0008152,GO:0009058,GO:0009060,GO:0009117,GO:0009123,GO:0009124,GO:0009126,GO:0009127,GO:0009141,GO:0009142,GO:…	-	ko:K02265	ko00190,ko01100,ko04260,ko04714,ko04932,ko05010,ko05012,ko05016,map00190,map01100,map04260,map04714,map04932,map05010,map05012,map05016	M00154	-	-	ko00000,ko00001,ko00002	3.D.4.11,3.D.4.8	-	-	COX5B
Gene.124982::LRWT_f2p0_873_transcript71343_g4::g.124982::m.124982	218851.Aquca_057_00134.1	1.15e-61	195.0	2BYKQ@1|root,2QQ4A@2759|Eukaryota,37KIT@33090|Viridiplantae,3G7XG@35493|Streptophyta	35493|Streptophyta	S	germin-like protein	-	-	-	-	-	-	-	-	-	-	-	-	Cupin_1
Gene.85232::LRWT_f5p0_1557_transcript42477_g1::g.85232::m.85232	218851.Aquca_041_00078.1	3.49e-261	721.0	COG2071@1|root,2QR1H@2759|Eukaryota,37RE4@33090|Viridiplantae,3G7M2@35493|Streptophyta	35493|Streptophyta	F	Class I glutamine amidotransferase-like superfamily protein	-	GO:0008150,GO:0022603,GO:0048831,GO:0050789,GO:0050793,GO:0051239,GO:0060688,GO:0065007,GO:1900618,GO:1905428,GO:2000026,GO:2000032	-	-	-	-	-	-	-	-	-	-	Peptidase_C26
Gene.113937::LRWT_f9p0_1012_transcript62560_g1::g.113937::m.113937	218851.Aquca_017_00788.1	6.38e-141	403.0	COG0500@1|root,KOG3010@2759|Eukaryota,37MXB@33090|Viridiplantae,3GDRV@35493|Streptophyta	35493|Streptophyta	Q	methyltransferase	-	GO:0003674,GO:0003824,GO:0005575,GO:0005622,GO:0005623,GO:0005737,GO:0008150,GO:0008152,GO:0008168,GO:0008757,GO:0016740,GO:0016741,GO:0032259,GO:0044424,GO:0044464	-	-	-	-	-	-	-	-	-	-	Methyltransf_11
Gene.123284::LRWT_f2p0_904_transcript69943_g5::g.123284::m.123284	218851.Aquca_009_00664.1	1.64e-62	197.0	KOG4680@1|root,KOG4680@2759|Eukaryota,37UGH@33090|Viridiplantae,3GIWV@35493|Streptophyta	35493|Streptophyta	S	phosphatidylglycerol phosphatidylinositol transfer protein	-	-	-	-	-	-	-	-	-	-	-	-	E1_DerP2_DerF2
Gene.39373::LRWT_f3p0_2794_transcript16048_g1::g.39373::m.39373	218851.Aquca_020_00020.1	0.0	1333.0	COG3808@1|root,2QPJC@2759|Eukaryota,37HW9@33090|Viridiplantae,3G71T@35493|Streptophyta	35493|Streptophyta	C	Pyrophosphate-energized vacuolar membrane proton	-	GO:0000325,GO:0001101,GO:0003674,GO:0003824,GO:0005215,GO:0005575,GO:0005622,GO:0005623,GO:0005737,GO:0005739,GO:0005768,GO:0005773,GO:0005774,GO:0005794,GO:0005886,GO:0006810,GO:0006811,GO:0006950,GO:0006970,GO:0007275,GO:0008150,GO:0009414,GO:0009415,GO:0009507,GO:0009526,GO:0009536,GO:0009628,GO:0009651,GO:0009678,GO:0009705,GO:0009914,GO:0009926,GO:0009941,GO:0010008,GO:0010035,GO:0010248,GO:…	3.6.1.1	ko:K01507	ko00190,map00190	-	-	-	ko00000,ko00001,ko01000	-	-	-	H_PPase
Gene.39913::LRWT_f5p0_2745_transcript16326_g1::g.39913::m.39913	218851.Aquca_020_00020.1	0.0	1303.0	COG3808@1|root,2QPJC@2759|Eukaryota,37HW9@33090|Viridiplantae,3G71T@35493|Streptophyta	35493|Streptophyta	C	Pyrophosphate-energized vacuolar membrane proton	-	GO:0000325,GO:0001101,GO:0003674,GO:0003824,GO:0005215,GO:0005575,GO:0005622,GO:0005623,GO:0005737,GO:0005739,GO:0005768,GO:0005773,GO:0005774,GO:0005794,GO:0005886,GO:0006810,GO:0006811,GO:0006950,GO:0006970,GO:0007275,GO:0008150,GO:0009414,GO:0009415,GO:0009507,GO:0009526,GO:0009536,GO:0009628,GO:0009651,GO:0009678,GO:0009705,GO:0009914,GO:0009926,GO:0009941,GO:0010008,GO:0010035,GO:0010248,GO:…	3.6.1.1	ko:K01507	ko00190,map00190	-	-	-	ko00000,ko00001,ko01000	-	-	-	H_PPase
Gene.52548::LRWT_f3p0_2360_transcript22961_g1::g.52548::m.52548	218851.Aquca_007_00964.1	0.0	1112.0	COG0205@1|root,KOG2440@2759|Eukaryota,37IN8@33090|Viridiplantae,3GFXB@35493|Streptophyta	35493|Streptophyta	G	Regulatory subunit of pyrophosphate--fructose 6- phosphate 1-phosphotransferase	PFP-ALPHA	GO:0003674,GO:0003824,GO:0005575,GO:0005622,GO:0005623,GO:0005737,GO:0005829,GO:0005975,GO:0006793,GO:0006796,GO:0008150,GO:0008152,GO:0008443,GO:0009743,GO:0009744,GO:0009746,GO:0009749,GO:0009750,GO:0009987,GO:0010033,GO:0015979,GO:0016301,GO:0016310,GO:0016740,GO:0016772,GO:0016773,GO:0019200,GO:0034284,GO:0034285,GO:0042221,GO:0044237,GO:0044238,GO:0044262,GO:0044424,GO:0044444,GO:0044464,GO:…	2.7.1.90	ko:K00895	ko00010,ko00030,ko00051,ko01100,ko01110,ko01120,ko01130,map00010,map00030,map00051,map01100,map01110,map01120,map01130	-	R00764,R02073	RC00017	ko00000,ko00001,ko01000	-	-	-	PFK
Gene.90291::LRWT_f4p0_1488_transcript45735_g5::g.90291::m.90291	225117.XP_009349012.1	2.61e-226	629.0	COG0022@1|root,KOG0524@2759|Eukaryota,37HH2@33090|Viridiplantae,3GEI8@35493|Streptophyta,4JECM@91835|fabids	35493|Streptophyta	C	The pyruvate dehydrogenase complex catalyzes the overall conversion of pyruvate to acetyl-CoA and CO(2)	-	GO:0005575,GO:0005622,GO:0005623,GO:0005737,GO:0005739,GO:0005759,GO:0031974,GO:0043226,GO:0043227,GO:0043229,GO:0043231,GO:0043233,GO:0044422,GO:0044424,GO:0044429,GO:0044444,GO:0044446,GO:0044464,GO:0070013	1.2.4.1	ko:K00162	ko00010,ko00020,ko00620,ko01100,ko01110,ko01120,ko01130,ko01200,ko04066,ko04922,ko05230,map00010,map00020,map00620,map01100,map01110,map01120,map01130,map01200,map04066,map04922,map05230	M00307	R00014,R00209,R01699,R03270	RC00004,RC00027,RC00627,RC02742,RC02744,RC02882	br01601,ko00000,ko00001,ko00002,ko01000	-	-	-	Transket_pyr,Transketolase_C
Gene.22049::LRWT_f3p0_3394_transcript8004_g1::g.22049::m.22049	218851.Aquca_024_00018.1	0.0	1598.0	KOG0039@1|root,KOG0039@2759|Eukaryota,37KYK@33090|Viridiplantae,3G87H@35493|Streptophyta	2759|Eukaryota	PQ	respiratory burst oxidase homolog protein	-	GO:0000166,GO:0003674,GO:0003824,GO:0005488,GO:0005575,GO:0005622,GO:0005623,GO:0005737,GO:0005794,GO:0005886,GO:0005887,GO:0006801,GO:0006950,GO:0006952,GO:0006970,GO:0007154,GO:0007165,GO:0007231,GO:0008150,GO:0008152,GO:0009266,GO:0009408,GO:0009605,GO:0009607,GO:0009611,GO:0009617,GO:0009620,GO:0009628,GO:0009653,GO:0009987,GO:0010941,GO:0012505,GO:0016020,GO:0016021,GO:0016174,GO:0016175,GO:…	1.6.3.1	ko:K13411,ko:K13447,ko:K21424	ko04013,ko04016,ko04624,ko04626,map04013,map04016,map04624,map04626	-	-	-	ko00000,ko00001,ko01000,ko04131	5.B.1.1.5,5.B.1.2	-	-	FAD_binding_8,Ferric_reduct,NADPH_Ox,NAD_binding_6
Gene.131584::LRWT_f2p0_756_transcript77089_g6::g.131584::m.131584	29760.VIT_02s0025g00640.t01	1.55e-78	241.0	KOG1792@1|root,KOG1792@2759|Eukaryota,37IBI@33090|Viridiplantae,3GAUK@35493|Streptophyta	35493|Streptophyta	U	Reticulon-like protein	BTI2	GO:0005575,GO:0005622,GO:0005623,GO:0005737,GO:0005773,GO:0005783,GO:0005789,GO:0005794,GO:0005886,GO:0005911,GO:0006996,GO:0007029,GO:0008150,GO:0009506,GO:0009987,GO:0010256,GO:0012505,GO:0016020,GO:0016021,GO:0016043,GO:0030054,GO:0030176,GO:0031224,GO:0031227,GO:0031984,GO:0042175,GO:0043226,GO:0043227,GO:0043229,GO:0043231,GO:0044422,GO:0044424,GO:0044425,GO:0044432,GO:0044444,GO:0044446,GO:…	-	ko:K20720,ko:K20721,ko:K20723	ko05010,map05010	-	-	-	ko00000,ko00001,ko03036,ko04131	-	-	-	Reticulon
Gene.113052::LRWT_f19p0_1048_transcript61909_g2::g.113052::m.113052	218851.Aquca_026_00324.1	1.78e-145	413.0	KOG1792@1|root,KOG1792@2759|Eukaryota,37KWJ@33090|Viridiplantae,3GERI@35493|Streptophyta	35493|Streptophyta	U	Reticulon-like protein	-	GO:0005575,GO:0005622,GO:0005623,GO:0005737,GO:0005739,GO:0043226,GO:0043227,GO:0043229,GO:0043231,GO:0044424,GO:0044444,GO:0044464	-	-	-	-	-	-	-	-	-	-	Reticulon
Gene.88162::LRWT_f5p0_1526_transcript44342_g1::g.88162::m.88162	29760.VIT_05s0020g00670.t01	2.23e-278	763.0	COG0192@1|root,KOG1506@2759|Eukaryota,37J2J@33090|Viridiplantae,3GE15@35493|Streptophyta	33090|Viridiplantae	H	Catalyzes the formation of S-adenosylmethionine from methionine and ATP	-	GO:0003674,GO:0003824,GO:0004478,GO:0005575,GO:0005622,GO:0005623,GO:0005737,GO:0005829,GO:0016740,GO:0016765,GO:0044424,GO:0044444,GO:0044464	2.5.1.6	ko:K00789	ko00270,ko01100,ko01110,ko01230,map00270,map01100,map01110,map01230	M00034,M00035,M00368,M00609	R00177,R04771	RC00021,RC01211	ko00000,ko00001,ko00002,ko01000	-	-	-	S-AdoMet_synt_C,S-AdoMet_synt_M,S-AdoMet_synt_N
Gene.91063::LRWT_f5p0_1482_transcript46263_g2::g.91063::m.91063	3750.XP_008390375.1	2.64e-286	781.0	COG0192@1|root,KOG1506@2759|Eukaryota,37J2J@33090|Viridiplantae,3GE15@35493|Streptophyta,4JS8C@91835|fabids	35493|Streptophyta	H	Catalyzes the formation of S-adenosylmethionine from methionine and ATP	MTO3	GO:0000096,GO:0003674,GO:0003676,GO:0003723,GO:0003729,GO:0003824,GO:0004478,GO:0005488,GO:0005575,GO:0005618,GO:0005622,GO:0005623,GO:0005634,GO:0005730,GO:0005737,GO:0005829,GO:0005886,GO:0005911,GO:0006082,GO:0006520,GO:0006555,GO:0006725,GO:0006790,GO:0006807,GO:0006950,GO:0008150,GO:0008152,GO:0009058,GO:0009066,GO:0009266,GO:0009409,GO:0009506,GO:0009628,GO:0009698,GO:0009699,GO:0009808,GO:…	2.5.1.6	ko:K00789	ko00270,ko01100,ko01110,ko01230,map00270,map01100,map01110,map01230	M00034,M00035,M00368,M00609	R00177,R04771	RC00021,RC01211	ko00000,ko00001,ko00002,ko01000	-	-	-	S-AdoMet_synt_C,S-AdoMet_synt_M,S-AdoMet_synt_N
Gene.73388::LRWT_f5p0_1821_transcript35067_g2::g.73388::m.73388	218851.Aquca_010_00617.1	2.32e-229	646.0	KOG1192@1|root,KOG1192@2759|Eukaryota,37J9T@33090|Viridiplantae,3GE9Z@35493|Streptophyta	35493|Streptophyta	CG	Belongs to the UDP-glycosyltransferase family	UGT73B5	GO:0003674,GO:0003824,GO:0005575,GO:0005622,GO:0005623,GO:0005737,GO:0005829,GO:0008150,GO:0008152,GO:0008194,GO:0009058,GO:0009605,GO:0009607,GO:0009812,GO:0009813,GO:0016740,GO:0016757,GO:0016758,GO:0035251,GO:0042440,GO:0043207,GO:0043226,GO:0043227,GO:0043229,GO:0043231,GO:0044424,GO:0044444,GO:0044464,GO:0046148,GO:0046527,GO:0047893,GO:0050896,GO:0051552,GO:0051553,GO:0051554,GO:0051555,GO:…	-	-	-	-	-	-	-	-	-	-	UDPGT
Gene.66768::LRWT_f24p0_1854_transcript31089_g1::g.66768::m.66768	218851.Aquca_030_00054.1	1.11e-282	783.0	COG2939@1|root,KOG1282@2759|Eukaryota,37J0Z@33090|Viridiplantae,3G9JB@35493|Streptophyta	35493|Streptophyta	O	Belongs to the peptidase S10 family	CBP3	GO:0003674,GO:0003824,GO:0004180,GO:0004185,GO:0005575,GO:0005576,GO:0005622,GO:0005623,GO:0005737,GO:0005773,GO:0005777,GO:0005783,GO:0005789,GO:0006508,GO:0006807,GO:0008150,GO:0008152,GO:0008233,GO:0008236,GO:0008238,GO:0009056,GO:0009057,GO:0009987,GO:0012505,GO:0016020,GO:0016787,GO:0017171,GO:0019538,GO:0030163,GO:0031984,GO:0042175,GO:0042579,GO:0043170,GO:0043226,GO:0043227,GO:0043229,GO:…	-	ko:K09645,ko:K16298	-	-	-	-	ko00000,ko01000,ko01002	-	-	-	Peptidase_S10
Gene.69494::LRWT_f44p0_1813_transcript32738_g1::g.69494::m.69494	218851.Aquca_058_00161.1	2.61e-304	835.0	COG2939@1|root,KOG1282@2759|Eukaryota,37M2A@33090|Viridiplantae,3G7C5@35493|Streptophyta	35493|Streptophyta	O	Belongs to the peptidase S10 family	-	GO:0003674,GO:0003824,GO:0005575,GO:0005576,GO:0005622,GO:0005623,GO:0005737,GO:0005773,GO:0005777,GO:0008150,GO:0008152,GO:0016740,GO:0016746,GO:0016747,GO:0019748,GO:0042579,GO:0043226,GO:0043227,GO:0043229,GO:0043231,GO:0044424,GO:0044444,GO:0044464	-	ko:K16296	-	-	-	-	ko00000,ko01000,ko01002	-	-	-	Peptidase_S10
Gene.69904::LRWT_f3p0_1896_transcript32979_g4::g.69904::m.69904	218851.Aquca_034_00074.1	0.0	917.0	COG0112@1|root,KOG2467@2759|Eukaryota,37KTU@33090|Viridiplantae,3GBR5@35493|Streptophyta	35493|Streptophyta	E	Interconversion of serine and glycine	-	GO:0000741,GO:0003674,GO:0003824,GO:0004372,GO:0005575,GO:0005622,GO:0005623,GO:0005737,GO:0005829,GO:0005886,GO:0005911,GO:0006730,GO:0006996,GO:0006997,GO:0007275,GO:0007623,GO:0008150,GO:0008152,GO:0009506,GO:0009553,GO:0009555,GO:0009559,GO:0009561,GO:0009987,GO:0010035,GO:0010038,GO:0010197,GO:0016020,GO:0016043,GO:0016740,GO:0016741,GO:0016742,GO:0030054,GO:0030154,GO:0032501,GO:0032502,GO:…	2.1.2.1	ko:K00600	ko00260,ko00460,ko00630,ko00670,ko00680,ko01100,ko01110,ko01120,ko01130,ko01200,ko01230,ko01523,map00260,map00460,map00630,map00670,map00680,map01100,map01110,map01120,map01130,map01200,map01230,map01523	M00140,M00141,M00346,M00532	R00945,R09099	RC00022,RC00112,RC01583,RC02958	ko00000,ko00001,ko00002,ko01000	-	-	-	SHMT
Gene.66299::LRWT_f3p0_1975_transcript30817_g6::g.66299::m.66299	218851.Aquca_010_00052.1	0.0	928.0	COG0112@1|root,KOG2467@2759|Eukaryota,37K7X@33090|Viridiplantae,3GCJ8@35493|Streptophyta	35493|Streptophyta	E	Interconversion of serine and glycine	-	GO:0001505,GO:0003674,GO:0003824,GO:0004372,GO:0005488,GO:0005575,GO:0005622,GO:0005623,GO:0005737,GO:0005739,GO:0005740,GO:0005743,GO:0005746,GO:0005747,GO:0005829,GO:0006082,GO:0006520,GO:0006544,GO:0006563,GO:0006807,GO:0008150,GO:0008152,GO:0008270,GO:0009069,GO:0009987,GO:0016020,GO:0016740,GO:0016741,GO:0016742,GO:0017144,GO:0019752,GO:0019866,GO:0030964,GO:0031090,GO:0031966,GO:0031967,GO:…	2.1.2.1	ko:K00600	ko00260,ko00460,ko00630,ko00670,ko00680,ko01100,ko01110,ko01120,ko01130,ko01200,ko01230,ko01523,map00260,map00460,map00630,map00670,map00680,map01100,map01110,map01120,map01130,map01200,map01230,map01523	M00140,M00141,M00346,M00532	R00945,R09099	RC00022,RC00112,RC01583,RC02958	ko00000,ko00001,ko00002,ko01000	-	-	-	SHMT
Gene.69868::LRWT_f13p0_1803_transcript32958_g1::g.69868::m.69868	218851.Aquca_002_00388.1	3.09e-296	812.0	KOG0598@1|root,KOG0598@2759|Eukaryota,37MXE@33090|Viridiplantae,3GC8K@35493|Streptophyta	35493|Streptophyta	T	serine threonine-protein kinase	-	GO:0003674,GO:0003824,GO:0004672,GO:0004674,GO:0005575,GO:0005622,GO:0005623,GO:0005634,GO:0005737,GO:0006417,GO:0006464,GO:0006468,GO:0006793,GO:0006796,GO:0006807,GO:0006950,GO:0006970,GO:0007154,GO:0007165,GO:0008150,GO:0008152,GO:0009266,GO:0009408,GO:0009409,GO:0009628,GO:0009651,GO:0009889,GO:0009891,GO:0009893,GO:0009987,GO:0010468,GO:0010556,GO:0010557,GO:0010604,GO:0010608,GO:0010628,GO:…	2.7.11.1	ko:K04688	ko01521,ko01522,ko04012,ko04066,ko04140,ko04150,ko04151,ko04152,ko04211,ko04212,ko04213,ko04350,ko04371,ko04666,ko04714,ko04910,ko04931,ko05165,ko05200,ko05205,ko05210,ko05212,ko05221,ko05224,ko05225,ko05226,ko05231,map01521,map01522,map04012,map04066,map04140,map04150,map04151,map04152,map04211,map04212,map04213,map04350,map04371,map04666,map04714,map04910,map04931,map05165,map05200,map05205,map…	-	-	-	ko00000,ko00001,ko01000,ko01001	-	-	-	Pkinase,Pkinase_C
Gene.117660::LRWT_f12p0_1002_transcript65461_g1::g.117660::m.117660	218851.Aquca_009_00536.1	1.3e-121	355.0	COG1028@1|root,KOG0725@2759|Eukaryota,37I6K@33090|Viridiplantae,3GCDJ@35493|Streptophyta	35493|Streptophyta	Q	Short-chain type dehydrogenase	-	-	1.1.1.100	ko:K00059	ko00061,ko00333,ko00780,ko01040,ko01100,ko01130,ko01212,map00061,map00333,map00780,map01040,map01100,map01130,map01212	M00083,M00572	R04533,R04534,R04536,R04543,R04566,R04953,R04964,R07759,R07763,R10116,R10120,R11671	RC00029,RC00117	ko00000,ko00001,ko00002,ko01000,ko01004	-	-	-	adh_short_C2
Gene.126781::LRWT_f8p0_816_transcript72854_g1::g.126781::m.126781	218851.Aquca_025_00239.1	1.39e-57	187.0	29YBJ@1|root,2S1E8@2759|Eukaryota,37VBT@33090|Viridiplantae,3GJJN@35493|Streptophyta	35493|Streptophyta	S	S-norcoclaurine	-	-	-	-	-	-	-	-	-	-	-	-	Bet_v_1
Gene.120810::LRWT_f84p0_886_transcript67952_g1::g.120810::m.120810	218851.Aquca_017_00306.1	1.64e-60	197.0	COG4886@1|root,KOG0619@2759|Eukaryota,37J4Q@33090|Viridiplantae,3GAFD@35493|Streptophyta	35493|Streptophyta	S	Somatic embryogenesis receptor kinase	-	GO:0000003,GO:0003006,GO:0003674,GO:0003824,GO:0004672,GO:0004674,GO:0004675,GO:0004888,GO:0005102,GO:0005488,GO:0005515,GO:0005575,GO:0005622,GO:0005623,GO:0005737,GO:0005783,GO:0005789,GO:0005886,GO:0006464,GO:0006468,GO:0006793,GO:0006796,GO:0006807,GO:0006996,GO:0007030,GO:0007049,GO:0007154,GO:0007165,GO:0007166,GO:0007167,GO:0007178,GO:0007275,GO:0008150,GO:0008152,GO:0009555,GO:0009556,GO:…	-	-	-	-	-	-	-	-	-	-	LRRNT_2,LRR_1,LRR_8
Gene.84781::LRWT_f2p0_1609_transcript42188_g5::g.84781::m.84781	218851.Aquca_034_00303.1	5.91e-131	382.0	COG0045@1|root,KOG2799@2759|Eukaryota,37IF6@33090|Viridiplantae,3GFE6@35493|Streptophyta	35493|Streptophyta	C	Succinyl-CoA synthetase functions in the citric acid cycle (TCA), coupling the hydrolysis of succinyl-CoA to the synthesis of ATP and thus represents the only step of substrate- level phosphorylation in the TCA. The beta subunit provides nucleotide specificity of the enzyme and binds the substrate succinate, while the binding sites for coenzyme A and phosphate are found in the alpha subunit	-	GO:0000166,GO:0003674,GO:0003824,GO:0004774,GO:0004775,GO:0005488,GO:0005507,GO:0005524,GO:0005575,GO:0005622,GO:0005623,GO:0005737,GO:0005739,GO:0006082,GO:0006091,GO:0006099,GO:0006101,GO:0006104,GO:0006105,GO:0006139,GO:0006163,GO:0006637,GO:0006725,GO:0006732,GO:0006753,GO:0006790,GO:0006793,GO:0006796,GO:0006807,GO:0008144,GO:0008150,GO:0008152,GO:0009060,GO:0009117,GO:0009150,GO:0009259,GO:…	6.2.1.4,6.2.1.5	ko:K01900	ko00020,ko00640,ko01100,ko01110,ko01120,ko01130,ko01200,map00020,map00640,map01100,map01110,map01120,map01130,map01200	M00009,M00011	R00432,R00727	RC00004,RC00014	ko00000,ko00001,ko00002,ko01000,ko04147	-	-	-	ATP-grasp_2,Ligase_CoA
Gene.84782::LRWT_f2p0_1609_transcript42188_g5::g.84782::m.84782	218851.Aquca_034_00303.1	1.97e-118	349.0	COG0045@1|root,KOG2799@2759|Eukaryota,37IF6@33090|Viridiplantae,3GFE6@35493|Streptophyta	35493|Streptophyta	C	Succinyl-CoA synthetase functions in the citric acid cycle (TCA), coupling the hydrolysis of succinyl-CoA to the synthesis of ATP and thus represents the only step of substrate- level phosphorylation in the TCA. The beta subunit provides nucleotide specificity of the enzyme and binds the substrate succinate, while the binding sites for coenzyme A and phosphate are found in the alpha subunit	-	GO:0000166,GO:0003674,GO:0003824,GO:0004774,GO:0004775,GO:0005488,GO:0005507,GO:0005524,GO:0005575,GO:0005622,GO:0005623,GO:0005737,GO:0005739,GO:0006082,GO:0006091,GO:0006099,GO:0006101,GO:0006104,GO:0006105,GO:0006139,GO:0006163,GO:0006637,GO:0006725,GO:0006732,GO:0006753,GO:0006790,GO:0006793,GO:0006796,GO:0006807,GO:0008144,GO:0008150,GO:0008152,GO:0009060,GO:0009117,GO:0009150,GO:0009259,GO:…	6.2.1.4,6.2.1.5	ko:K01900	ko00020,ko00640,ko01100,ko01110,ko01120,ko01130,ko01200,map00020,map00640,map01100,map01110,map01120,map01130,map01200	M00009,M00011	R00432,R00727	RC00004,RC00014	ko00000,ko00001,ko00002,ko01000,ko04147	-	-	-	ATP-grasp_2,Ligase_CoA
Gene.89650::LRWT_f2p0_1524_transcript45312_g15::g.89650::m.89650	218851.Aquca_078_00024.1	1.47e-215	600.0	COG4870@1|root,KOG1543@2759|Eukaryota,37SFA@33090|Viridiplantae,3G8S3@35493|Streptophyta	35493|Streptophyta	O	Belongs to the peptidase C1 family	-	-	3.4.22.16	ko:K01366	ko04142,ko04210,map04142,map04210	-	-	-	ko00000,ko00001,ko01000,ko01002	-	-	-	Inhibitor_I29,Peptidase_C1
Gene.99255::LRWT_f9p0_1269_transcript51943_g1::g.99255::m.99255	218851.Aquca_004_00457.1	1.23e-177	501.0	KOG2641@1|root,KOG2641@2759|Eukaryota,37PDN@33090|Viridiplantae,3GH3M@35493|Streptophyta	35493|Streptophyta	T	Transmembrane protein 184C-like	-	-	-	-	-	-	-	-	-	-	-	-	Solute_trans_a
Gene.57284::LRWT_f61p0_2134_transcript25603_g1::g.57284::m.57284	218851.Aquca_007_00879.1	1.18e-238	674.0	COG5272@1|root,KOG0010@2759|Eukaryota,37NMD@33090|Viridiplantae,3GBKJ@35493|Streptophyta	35493|Streptophyta	O	Ubiquitin domain-containing protein	-	GO:0000045,GO:0001666,GO:0003674,GO:0005488,GO:0005515,GO:0005575,GO:0005622,GO:0005623,GO:0005634,GO:0005654,GO:0005737,GO:0005773,GO:0005776,GO:0005783,GO:0005829,GO:0005886,GO:0006508,GO:0006511,GO:0006807,GO:0006914,GO:0006950,GO:0006996,GO:0007033,GO:0008150,GO:0008152,GO:0009056,GO:0009057,GO:0009628,GO:0009893,GO:0009894,GO:0009896,GO:0009966,GO:0009987,GO:0010033,GO:0010243,GO:0010498,GO:…	-	ko:K04523	ko04141,map04141	-	-	-	ko00000,ko00001,ko03051,ko04131	-	-	-	UBA,ubiquitin
Gene.73234::LRWT_f3p0_1823_transcript34979_g1::g.73234::m.73234	218851.Aquca_009_00097.1	6.07e-176	512.0	KOG0118@1|root,KOG0118@2759|Eukaryota,37QP7@33090|Viridiplantae,3GCDZ@35493|Streptophyta	35493|Streptophyta	A	UBP1-associated protein	-	-	-	ko:K12741	ko03040,map03040	-	-	-	ko00000,ko00001,ko03019,ko03041	-	-	-	RRM_1
Gene.79829::LRWT_f2p0_1711_transcript39076_g9::g.79829::m.79829	3712.Bo8g112600.1	5.54e-269	737.0	COG0451@1|root,KOG1429@2759|Eukaryota,37PXX@33090|Viridiplantae,3GDPQ@35493|Streptophyta,3HS38@3699|Brassicales	35493|Streptophyta	GM	UDP-D-apiose UDP-D-xylose synthase	AXS2	GO:0005575,GO:0005576,GO:0005622,GO:0005623,GO:0005737,GO:0005829,GO:0044424,GO:0044444,GO:0044464,GO:0048046	-	ko:K12449	ko00520,ko01100,map00520,map01100	-	R01384,R01386	RC00508,RC01811	ko00000,ko00001	-	-	-	Epimerase
Gene.67096::LRWT_f3p0_1945_transcript31281_g1::g.67096::m.67096	218851.Aquca_014_00629.1	1.47e-293	808.0	COG0461@1|root,KOG1377@2759|Eukaryota,37INB@33090|Viridiplantae,3GBYY@35493|Streptophyta	35493|Streptophyta	F	Uridine 5-monophosphate	-	GO:0005575,GO:0005622,GO:0005623,GO:0005737,GO:0005829,GO:0006950,GO:0007154,GO:0008150,GO:0009267,GO:0009605,GO:0009987,GO:0009991,GO:0010035,GO:0010038,GO:0016036,GO:0031667,GO:0031668,GO:0031669,GO:0033554,GO:0042221,GO:0042594,GO:0044424,GO:0044444,GO:0044464,GO:0046686,GO:0050896,GO:0051716,GO:0071496	2.4.2.10,4.1.1.23	ko:K13421	ko00240,ko00983,ko01100,map00240,map00983,map01100	M00051	R00965,R01870,R08231	RC00063,RC00409,RC00611	ko00000,ko00001,ko00002,ko01000	-	-	-	OMPdecase,Pribosyltran
Gene.45663::LRWT_f17p0_2535_transcript19296_g1::g.45663::m.45663	29760.VIT_08s0058g01360.t01	0.0	1167.0	28KFV@1|root,2QSX2@2759|Eukaryota,37IZS@33090|Viridiplantae,3G7YA@35493|Streptophyta	33090|Viridiplantae	T	Vacuolar-sorting receptor	VSR1	GO:0000139,GO:0003674,GO:0005048,GO:0005488,GO:0005575,GO:0005622,GO:0005623,GO:0005737,GO:0005768,GO:0005770,GO:0005783,GO:0005794,GO:0005802,GO:0005886,GO:0006605,GO:0006623,GO:0006810,GO:0006886,GO:0006892,GO:0006896,GO:0007034,GO:0008104,GO:0008150,GO:0009940,GO:0010008,GO:0010209,GO:0012505,GO:0012506,GO:0015031,GO:0015833,GO:0016020,GO:0016192,GO:0030135,GO:0030136,GO:0030659,GO:0030662,GO:…	-	-	-	-	-	-	-	-	-	-	EGF_CA,PA,cEGF
Gene.51799::LRWT_f3p0_2380_transcript22570_g2::g.51799::m.51799	218851.Aquca_005_00158.1	0.0	1211.0	COG1155@1|root,KOG1352@2759|Eukaryota,37HMX@33090|Viridiplantae,3GFH8@35493|Streptophyta	35493|Streptophyta	C	V-type proton ATPase catalytic subunit	-	-	3.6.3.14	ko:K02145	ko00190,ko01100,ko04145,ko04150,ko04721,ko04966,ko05110,ko05120,ko05323,map00190,map01100,map04145,map04150,map04721,map04966,map05110,map05120,map05323	M00160	-	-	ko00000,ko00001,ko00002,ko01000	3.A.2.2	-	-	ATP-synt_ab,ATP-synt_ab_N,ATP-synt_ab_Xtn
Gene.30190::LRWT_f100p0_2987_transcript11640_g1::g.30190::m.30190	218851.Aquca_007_00328.1	0.0	1431.0	COG1269@1|root,KOG2189@2759|Eukaryota,37J5B@33090|Viridiplantae,3GCXI@35493|Streptophyta	35493|Streptophyta	P	Essential component of the vacuolar proton pump (V- ATPase), a multimeric enzyme that catalyzes the translocation of protons across the membranes. Required for assembly and activity of the V-ATPase	-	GO:0000323,GO:0000325,GO:0000331,GO:0003674,GO:0003824,GO:0005215,GO:0005488,GO:0005515,GO:0005575,GO:0005622,GO:0005623,GO:0005737,GO:0005764,GO:0005765,GO:0005768,GO:0005773,GO:0005774,GO:0005794,GO:0005886,GO:0006139,GO:0006163,GO:0006164,GO:0006725,GO:0006753,GO:0006754,GO:0006793,GO:0006796,GO:0006807,GO:0006810,GO:0006811,GO:0006812,GO:0006873,GO:0006875,GO:0006882,GO:0006885,GO:0006897,GO:…	-	ko:K02154	ko00190,ko01100,ko04142,ko04145,ko04721,ko04966,ko05110,ko05120,ko05152,ko05165,ko05323,map00190,map01100,map04142,map04145,map04721,map04966,map05110,map05120,map05152,map05165,map05323	M00160	-	-	ko00000,ko00001,ko00002,ko04147	3.A.2.2	-	-	V_ATPase_I
Gene.56954::LRWT_f4p0_2150_transcript25412_g1::g.56954::m.56954	218851.Aquca_009_00878.1	0.0	1060.0	COG0515@1|root,KOG1187@2759|Eukaryota,37K1Q@33090|Viridiplantae,3GCY6@35493|Streptophyta	35493|Streptophyta	T	wall-associated receptor kinase-like	-	-	-	-	-	-	-	-	-	-	-	-	GUB_WAK_bind,Pkinase,Pkinase_Tyr
Gene.88673::LRWT_f3p0_1528_transcript44670_g1::g.88673::m.88673	218851.Aquca_014_00852.1	1.35e-123	363.0	28N0B@1|root,2QRHH@2759|Eukaryota,37MSB@33090|Viridiplantae	33090|Viridiplantae	S	WAT1-related protein	-	-	-	-	-	-	-	-	-	-	-	-	EamA
Gene.73725::LRWT_f56p0_1762_transcript35287_g1::g.73725::m.73725	218851.Aquca_017_00205.1	2.07e-312	855.0	KOG4748@1|root,KOG4748@2759|Eukaryota,37KWE@33090|Viridiplantae,3G8T7@35493|Streptophyta	35493|Streptophyta	GM	glycosyltransferase	-	GO:0000271,GO:0003674,GO:0003824,GO:0005488,GO:0005515,GO:0005575,GO:0005622,GO:0005623,GO:0005737,GO:0005768,GO:0005794,GO:0005802,GO:0005975,GO:0005976,GO:0006073,GO:0008150,GO:0008152,GO:0008194,GO:0009058,GO:0009059,GO:0009987,GO:0010383,GO:0010410,GO:0010411,GO:0012505,GO:0016051,GO:0016740,GO:0016757,GO:0016758,GO:0016763,GO:0031410,GO:0031982,GO:0031984,GO:0033843,GO:0035252,GO:0042285,GO:…	2.4.2.39	ko:K08238	-	-	-	-	ko00000,ko01000,ko01003	-	GT34	-	Glyco_transf_34
Gene.110660::LRWT_f2p0_1139_transcript60126_g8::g.110660::m.110660	218851.Aquca_005_00378.1	5.05e-173	486.0	COG2273@1|root,2QS4T@2759|Eukaryota,37KRG@33090|Viridiplantae,3GA1R@35493|Streptophyta	35493|Streptophyta	G	Catalyzes xyloglucan endohydrolysis (XEH) and or endotransglycosylation (XET). Cleaves and religates xyloglucan polymers, an essential constituent of the primary cell wall, and thereby participates in cell wall construction of growing tissues	-	GO:0003674,GO:0003824,GO:0016740,GO:0016757,GO:0016758,GO:0016762,GO:0046527	2.4.1.207	ko:K08235	-	-	-	-	ko00000,ko01000	-	-	-	Glyco_hydro_16,XET_C
Gene.121881::LRWT_f50p0_903_transcript68818_g1::g.121881::m.121881	218851.Aquca_041_00037.1	2.57e-61	201.0	2CN4H@1|root,2QTV9@2759|Eukaryota,37T85@33090|Viridiplantae,3GG61@35493|Streptophyta	35493|Streptophyta	S	Zinc finger protein	-	GO:0000902,GO:0000904,GO:0001067,GO:0001101,GO:0003674,GO:0003676,GO:0003677,GO:0003700,GO:0005488,GO:0005575,GO:0005622,GO:0005623,GO:0005634,GO:0005737,GO:0005829,GO:0005840,GO:0006082,GO:0006355,GO:0006790,GO:0006807,GO:0007154,GO:0007165,GO:0008150,GO:0008152,GO:0009653,GO:0009719,GO:0009725,GO:0009735,GO:0009736,GO:0009739,GO:0009740,GO:0009755,GO:0009787,GO:0009788,GO:0009888,GO:0009889,GO:…	-	-	-	-	-	-	-	-	-	-	zf-C2H2_6
Gene.84160::LRWT_f5p0_1614_transcript41802_g1::g.84160::m.84160	218851.Aquca_012_00237.1	1.27e-47	166.0	KOG1192@1|root,KOG1192@2759|Eukaryota	218851.Aquca_012_00237.1|-	G	transferase activity, transferring hexosyl groups	-	-	-	-	-	-	-	-	-	-	-	-	-
Gene.84159::LRWT_f5p0_1614_transcript41802_g1::g.84159::m.84159	218851.Aquca_012_00022.1	2.7e-76	246.0	KOG1192@1|root,KOG1192@2759|Eukaryota,37ZC2@33090|Viridiplantae	33090|Viridiplantae	CG	UDP-glucoronosyl and UDP-glucosyl transferase	-	-	2.4.1.324	ko:K21374	-	-	-	-	ko00000,ko01000,ko01003	-	GT1	-	UDPGT
Gene.80591::LRWT_f6p0_1678_transcript39541_g4::g.80591::m.80591	218851.Aquca_028_00265.1	1.27e-177	513.0	KOG1192@1|root,KOG1192@2759|Eukaryota	218851.Aquca_028_00265.1|-	G	transferase activity, transferring hexosyl groups	-	-	-	-	-	-	-	-	-	-	-	-	-
Gene.85307::LRWT_f6p0_1595_transcript42527_g1::g.85307::m.85307	218851.Aquca_016_00020.1	3.49e-227	640.0	KOG1192@1|root,KOG1192@2759|Eukaryota,37ZC2@33090|Viridiplantae,3GP97@35493|Streptophyta	35493|Streptophyta	CG	UDP-glucoronosyl and UDP-glucosyl transferase	-	-	2.4.1.324	ko:K21374	-	-	-	-	ko00000,ko01000,ko01003	-	GT1	-	UDPGT
Gene.113753::LRWT_f5p0_1074_transcript62427_g2::g.113753::m.113753	218851.Aquca_027_00371.1	8.52e-167	468.0	COG0149@1|root,KOG1643@2759|Eukaryota,37IFK@33090|Viridiplantae,3G8AG@35493|Streptophyta	35493|Streptophyta	G	triosephosphate isomerase	-	-	-	-	-	-	-	-	-	-	-	-	TIM
Gene.88815::LRWT_f7p0_1507_transcript44765_g2::g.88815::m.88815	3659.XP_004152990.1	1.38e-75	243.0	COG0090@1|root,KOG0438@2759|Eukaryota,37TIQ@33090|Viridiplantae,3GHDG@35493|Streptophyta,4JS8D@91835|fabids	35493|Streptophyta	J	Ribosomal protein L2	-	GO:0000313,GO:0000315,GO:0003674,GO:0003676,GO:0003723,GO:0003729,GO:0005488,GO:0005575,GO:0005622,GO:0005623,GO:0005737,GO:0005739,GO:0005759,GO:0005761,GO:0005762,GO:0005840,GO:0006412,GO:0006518,GO:0006807,GO:0008150,GO:0008152,GO:0009058,GO:0009059,GO:0009987,GO:0010467,GO:0015934,GO:0019538,GO:0031974,GO:0032543,GO:0032991,GO:0034641,GO:0034645,GO:0043043,GO:0043170,GO:0043226,GO:0043227,GO:…	-	-	-	-	-	-	-	-	-	-	Ribosomal_L2
Gene.94477::LRWT_f3p0_1425_transcript48588_g2::g.94477::m.94477	218851.Aquca_033_00127.1	9.21e-117	347.0	28IIJ@1|root,2QQVK@2759|Eukaryota,37SA4@33090|Viridiplantae,3GC7U@35493|Streptophyta	35493|Streptophyta	S	Salicylate	-	-	2.1.1.274	ko:K21483	-	-	-	-	ko00000,ko01000	-	-	-	Methyltransf_7
Gene.113326::LRWT_f2p0_1085_transcript62115_g2::g.113326::m.113326	4432.XP_010276367.1	8.07e-141	400.0	COG0605@1|root,KOG0876@2759|Eukaryota,37MWT@33090|Viridiplantae,3G7A0@35493|Streptophyta	35493|Streptophyta	P	radicals which are normally produced within the cells and which are toxic to biological systems	-	GO:0000003,GO:0003006,GO:0007275,GO:0008150,GO:0009791,GO:0009838,GO:0009908,GO:0010227,GO:0022414,GO:0032501,GO:0032502,GO:0048367,GO:0048437,GO:0048608,GO:0048731,GO:0048856,GO:0061458,GO:0090567,GO:0099402	1.15.1.1	ko:K04564	ko04013,ko04068,ko04146,ko04211,ko04212,ko04213,ko05016,map04013,map04068,map04146,map04211,map04212,map04213,map05016	-	-	-	ko00000,ko00001,ko01000	-	-	-	Sod_Fe_C,Sod_Fe_N
Gene.127972::LRWT_f7p0_795_transcript73923_g1::g.127972::m.127972	218851.Aquca_034_00125.1	8.84e-80	240.0	COG5274@1|root,KOG0537@2759|Eukaryota,37UZ2@33090|Viridiplantae,3GISV@35493|Streptophyta	35493|Streptophyta	C	Cytochrome b5	-	GO:0005575,GO:0005622,GO:0005623,GO:0005737,GO:0005783,GO:0008150,GO:0008152,GO:0009058,GO:0009987,GO:0012505,GO:0043226,GO:0043227,GO:0043229,GO:0043231,GO:0043446,GO:0043447,GO:0044237,GO:0044249,GO:0044424,GO:0044444,GO:0044464,GO:0071704,GO:1901576	-	-	-	-	-	-	-	-	-	-	Cyt-b5
Gene.72226::LRWT_f3p0_1835_transcript34394_g2::g.72226::m.72226	218851.Aquca_045_00064.1	1.6e-217	615.0	28IPQ@1|root,2QR0T@2759|Eukaryota,37PZR@33090|Viridiplantae,3GDBK@35493|Streptophyta	35493|Streptophyta	S	Phosphoenolpyruvate carboxykinase	-	-	-	-	-	-	-	-	-	-	-	-	PEPCK_ATP
Gene.120352::LRWT_f8p0_937_transcript67582_g2::g.120352::m.120352	218851.Aquca_002_00919.1	2.29e-121	352.0	COG2761@1|root,2QTH7@2759|Eukaryota,37I74@33090|Viridiplantae,3GBGS@35493|Streptophyta	35493|Streptophyta	Q	DSBA-like thioredoxin domain	-	-	-	-	-	-	-	-	-	-	-	-	DSBA
Gene.92041::LRWT_f3p0_1478_transcript46916_g3::g.92041::m.92041	218851.Aquca_009_00013.1	2.23e-152	436.0	2CIZ6@1|root,2QW89@2759|Eukaryota,37NU8@33090|Viridiplantae,3GBUA@35493|Streptophyta	35493|Streptophyta	-	-	-	-	-	-	-	-	-	-	-	-	-	-	-
Gene.84861::LRWT_f32p0_1578_transcript42243_g3::g.84861::m.84861	218851.Aquca_004_00801.1	1.91e-217	611.0	28IU4@1|root,2QR5M@2759|Eukaryota,37NR9@33090|Viridiplantae,3G8QD@35493|Streptophyta	35493|Streptophyta	S	Crt homolog	-	GO:0002229,GO:0002239,GO:0005575,GO:0005622,GO:0005623,GO:0005737,GO:0006810,GO:0006811,GO:0006820,GO:0006857,GO:0006950,GO:0006952,GO:0008150,GO:0009536,GO:0009605,GO:0009607,GO:0010035,GO:0010038,GO:0015711,GO:0015833,GO:0034635,GO:0042221,GO:0042886,GO:0042939,GO:0043207,GO:0043226,GO:0043227,GO:0043229,GO:0043231,GO:0044424,GO:0044444,GO:0044464,GO:0046686,GO:0050896,GO:0051179,GO:0051181,GO:…	-	-	-	-	-	-	-	-	-	-	CRT-like
Gene.54962::LRWT_f3p0_2288_transcript24298_g5::g.54962::m.54962	218851.Aquca_002_01178.1	0.0	988.0	COG0055@1|root,KOG1350@2759|Eukaryota,37N26@33090|Viridiplantae,3G7JF@35493|Streptophyta	35493|Streptophyta	C	Produces ATP from ADP in the presence of a proton gradient across the membrane	ATPB	GO:0000166,GO:0003674,GO:0005488,GO:0005524,GO:0005575,GO:0005622,GO:0005623,GO:0005737,GO:0005739,GO:0005740,GO:0005743,GO:0006139,GO:0006163,GO:0006164,GO:0006725,GO:0006753,GO:0006754,GO:0006793,GO:0006796,GO:0006807,GO:0006810,GO:0006811,GO:0006812,GO:0008144,GO:0008150,GO:0008152,GO:0009058,GO:0009117,GO:0009123,GO:0009124,GO:0009126,GO:0009127,GO:0009141,GO:0009142,GO:0009144,GO:0009145,GO:…	3.6.3.14	ko:K02133	ko00190,ko01100,ko04714,ko05010,ko05012,ko05016,map00190,map01100,map04714,map05010,map05012,map05016	M00158	-	-	ko00000,ko00001,ko00002,ko01000	3.A.2.1	-	-	ATP-synt_ab,ATP-synt_ab_N,Synthase_beta
Gene.80156::LRWT_f7p0_1683_transcript39275_g2::g.80156::m.80156	218851.Aquca_015_00300.1	4.52e-230	642.0	COG0679@1|root,KOG2722@2759|Eukaryota,37RGC@33090|Viridiplantae,3GCCN@35493|Streptophyta	35493|Streptophyta	S	Transporter	-	GO:0003674,GO:0005215,GO:0005575,GO:0005622,GO:0005623,GO:0005737,GO:0005783,GO:0005789,GO:0006810,GO:0007275,GO:0008150,GO:0009653,GO:0009719,GO:0009725,GO:0009733,GO:0009791,GO:0009914,GO:0009966,GO:0010015,GO:0010033,GO:0010101,GO:0010102,GO:0010252,GO:0010311,GO:0010315,GO:0010329,GO:0010646,GO:0010817,GO:0010928,GO:0012505,GO:0015562,GO:0016020,GO:0022622,GO:0022857,GO:0023051,GO:0031984,GO:…	-	ko:K07088	-	-	-	-	ko00000	-	-	-	Mem_trans
Gene.82075::LRWT_f13p0_1617_transcript40481_g1::g.82075::m.82075	218851.Aquca_002_01316.1	9.61e-205	578.0	28IGS@1|root,2QQTM@2759|Eukaryota,37JUF@33090|Viridiplantae,3G7BR@35493|Streptophyta	35493|Streptophyta	S	Protein of unknown function (DUF760)	-	GO:0000302,GO:0001101,GO:0006950,GO:0006979,GO:0008150,GO:0009314,GO:0009411,GO:0009416,GO:0009611,GO:0009628,GO:0010035,GO:0010193,GO:0010224,GO:0042221,GO:0042493,GO:0046677,GO:0050896,GO:1901700	-	-	-	-	-	-	-	-	-	-	DUF760
Gene.98891::LRWT_f96p0_1312_transcript51678_g1::g.98891::m.98891	218851.Aquca_002_01412.1	1.28e-115	344.0	28NUQ@1|root,2QVER@2759|Eukaryota,37R6M@33090|Viridiplantae,3GAEA@35493|Streptophyta	35493|Streptophyta	S	Tetratricopeptide repeat	-	GO:0005575,GO:0005622,GO:0005623,GO:0005737,GO:0006996,GO:0008150,GO:0009507,GO:0009526,GO:0009536,GO:0009657,GO:0009658,GO:0009941,GO:0009987,GO:0016043,GO:0031967,GO:0031975,GO:0043226,GO:0043227,GO:0043229,GO:0043231,GO:0044422,GO:0044424,GO:0044434,GO:0044435,GO:0044444,GO:0044446,GO:0044464,GO:0071840	-	-	-	-	-	-	-	-	-	-	TPR_16,TPR_19,TPR_6,TPR_8
Gene.120099::LRWT_f13p0_925_transcript67392_g1::g.120099::m.120099	4432.XP_010247173.1	1.77e-110	325.0	28M72@1|root,2QTQ1@2759|Eukaryota,37S2M@33090|Viridiplantae,3G8D9@35493|Streptophyta	35493|Streptophyta	-	-	-	-	-	-	-	-	-	-	-	-	-	-	-
Gene.124372::LRWT_f5p0_879_transcript70824_g3::g.124372::m.124372	3656.XP_008458858.1	2.81e-09	62.0	2C3B6@1|root,2RZJY@2759|Eukaryota,37UEV@33090|Viridiplantae,3GJ2K@35493|Streptophyta,4JQ7J@91835|fabids	35493|Streptophyta	-	-	-	-	-	-	-	-	-	-	-	-	-	-	-
Gene.87743::LRWT_f3p0_1552_transcript44065_g1::g.87743::m.87743	218851.Aquca_002_00006.1	4.25e-192	545.0	2CCM1@1|root,2QRR9@2759|Eukaryota,37M4Z@33090|Viridiplantae,3GANW@35493|Streptophyta	35493|Streptophyta	S	Encoded by	-	-	-	-	-	-	-	-	-	-	-	-	SURNod19
Gene.98887::LRWT_f4p0_1343_transcript51676_g2::g.98887::m.98887	218851.Aquca_002_00712.1	3.03e-115	343.0	28HIX@1|root,2QPWS@2759|Eukaryota,37SRK@33090|Viridiplantae,3GCWM@35493|Streptophyta	35493|Streptophyta	-	-	-	-	-	-	-	-	-	-	-	-	-	-	-
Gene.94501::LRWT_f2p0_1432_transcript48602_g14::g.94501::m.94501	218851.Aquca_022_00031.1	1.12e-161	467.0	COG0111@1|root,KOG0068@2759|Eukaryota	2759|Eukaryota	EH	phosphoglycerate dehydrogenase activity	-	-	1.1.1.399,1.1.1.95	ko:K00058	ko00260,ko00680,ko01100,ko01120,ko01130,ko01200,ko01230,map00260,map00680,map01100,map01120,map01130,map01200,map01230	M00020	R01513	RC00031	ko00000,ko00001,ko00002,ko01000,ko04147	-	-	-	2-Hacid_dh,2-Hacid_dh_C
Gene.60906::LRWT_f2p0_2116_transcript27645_g10::g.60906::m.60906	218851.Aquca_012_00252.1	2.41e-241	687.0	28H93@1|root,2QPMS@2759|Eukaryota,37PK1@33090|Viridiplantae,3GBSJ@35493|Streptophyta	35493|Streptophyta	S	eukaryotic translation initiation factor-related	-	-	-	-	-	-	-	-	-	-	-	-	eIF-4B
Gene.55341::LRWT_f9p0_2226_transcript24520_g1::g.55341::m.55341	218851.Aquca_003_00384.1	0.0	986.0	COG0823@1|root,2QPTW@2759|Eukaryota,37K0C@33090|Viridiplantae,3GE93@35493|Streptophyta	35493|Streptophyta	U	WD40-like Beta Propeller Repeat	-	-	-	-	-	-	-	-	-	-	-	-	DPPIV_N,PD40
Gene.55530::LRWT_f12p0_2239_transcript24617_g1::g.55530::m.55530	218851.Aquca_003_00384.1	0.0	986.0	COG0823@1|root,2QPTW@2759|Eukaryota,37K0C@33090|Viridiplantae,3GE93@35493|Streptophyta	35493|Streptophyta	U	WD40-like Beta Propeller Repeat	-	-	-	-	-	-	-	-	-	-	-	-	DPPIV_N,PD40
Gene.68712::LRWT_f12p0_1904_transcript32269_g1::g.68712::m.68712	218851.Aquca_004_00738.1	3.6e-286	784.0	28NR1@1|root,2QVB2@2759|Eukaryota,37HM8@33090|Viridiplantae,3GA7F@35493|Streptophyta	35493|Streptophyta	S	BEST Arabidopsis thaliana protein match is Protein of	-	-	-	-	-	-	-	-	-	-	-	-	Neprosin,Neprosin_AP
Gene.129732::LRWT_f2p0_791_transcript75441_g23::g.129732::m.129732	218851.Aquca_026_00397.1	1.31e-77	236.0	29UHG@1|root,2RXIP@2759|Eukaryota,37U8J@33090|Viridiplantae,3GIF7@35493|Streptophyta	35493|Streptophyta	-	-	-	-	-	-	-	-	-	-	-	-	-	-	-
Gene.59373::LRWT_f6p0_2133_transcript26794_g1::g.59373::m.59373	218851.Aquca_055_00085.1	1.26e-274	767.0	28NP9@1|root,2QV8Y@2759|Eukaryota,37RHG@33090|Viridiplantae,3GBYD@35493|Streptophyta	35493|Streptophyta	S	Belongs to the Ca(2 ) cation antiporter (CaCA) (TC 2.A.19) family	-	GO:0000325,GO:0003674,GO:0005215,GO:0005432,GO:0005488,GO:0005509,GO:0005575,GO:0005622,GO:0005623,GO:0005737,GO:0005773,GO:0005774,GO:0005911,GO:0006810,GO:0006811,GO:0006812,GO:0006814,GO:0006816,GO:0006950,GO:0006970,GO:0008150,GO:0008324,GO:0009506,GO:0009628,GO:0009651,GO:0009987,GO:0015075,GO:0015077,GO:0015081,GO:0015085,GO:0015291,GO:0015297,GO:0015298,GO:0015318,GO:0015368,GO:0015491,GO:…	-	-	-	-	-	-	-	-	-	-	EF-hand_7,Na_Ca_ex
Gene.133804::LRWT_f4p0_698_transcript79078_g4::g.133804::m.133804	4432.XP_010259720.1	3.13e-22	94.0	2BS7P@1|root,2S1Y2@2759|Eukaryota,37VFR@33090|Viridiplantae,3GJQQ@35493|Streptophyta	35493|Streptophyta	-	-	-	-	-	-	-	-	-	-	-	-	-	-	-
Gene.102033::LRWT_f5p0_1281_transcript53870_g2::g.102033::m.102033	218851.Aquca_010_00461.1	3.09e-126	370.0	28I7F@1|root,2QU5J@2759|Eukaryota,37RE6@33090|Viridiplantae,3GCNT@35493|Streptophyta	35493|Streptophyta	S	BURP domain-containing protein	-	-	-	-	-	-	-	-	-	-	-	-	BURP
Gene.124391::LRWT_f7p0_872_transcript70841_g2::g.124391::m.124391	2711.XP_006470067.1	4.66e-98	291.0	2CBKH@1|root,2QT42@2759|Eukaryota,37N6T@33090|Viridiplantae,3G798@35493|Streptophyta	35493|Streptophyta	U	Mitochondrial import receptor subunit	-	GO:0003674,GO:0005215,GO:0005575,GO:0005622,GO:0005623,GO:0005737,GO:0005739,GO:0005740,GO:0005741,GO:0005742,GO:0005743,GO:0005744,GO:0006605,GO:0006626,GO:0006810,GO:0006839,GO:0006886,GO:0006996,GO:0007005,GO:0008104,GO:0008150,GO:0008320,GO:0008565,GO:0009987,GO:0015031,GO:0015399,GO:0015405,GO:0015450,GO:0015833,GO:0016020,GO:0016043,GO:0019866,GO:0019867,GO:0022804,GO:0022857,GO:0022884,GO:…	-	-	-	-	-	-	-	-	-	-	TOM20_plant
Gene.119584::LRWT_f10p0_950_transcript66981_g2::g.119584::m.119584	218851.Aquca_026_00227.1	6.87e-110	324.0	2CM9D@1|root,2QPP8@2759|Eukaryota,37RKD@33090|Viridiplantae,3GCT2@35493|Streptophyta	35493|Streptophyta	S	allene oxide cyclase	aoc	-	5.3.99.6	ko:K10525	ko00592,ko01100,ko01110,map00592,map01100,map01110	M00113	R03402	RC00922	ko00000,ko00001,ko00002,ko01000	-	-	-	Allene_ox_cyc
Gene.124585::LRWT_f2p0_889_transcript71018_g16::g.124585::m.124585	218851.Aquca_005_00189.1	3.79e-114	332.0	28N8X@1|root,2QUU9@2759|Eukaryota,37QSW@33090|Viridiplantae,3GFT9@35493|Streptophyta	35493|Streptophyta	S	LURP-one-related	-	GO:0001101,GO:0006950,GO:0006952,GO:0008150,GO:0009605,GO:0009607,GO:0009620,GO:0009719,GO:0009725,GO:0009751,GO:0010033,GO:0014070,GO:0042221,GO:0042493,GO:0043207,GO:0046677,GO:0050832,GO:0050896,GO:0051704,GO:0051707,GO:0098542,GO:1901700	-	-	-	-	-	-	-	-	-	-	LOR
Gene.78086::LRWT_f38p0_1684_transcript37978_g1::g.78086::m.78086	218851.Aquca_011_00285.1	1.84e-298	817.0	COG0814@1|root,KOG1303@2759|Eukaryota,37S1T@33090|Viridiplantae,3G766@35493|Streptophyta	35493|Streptophyta	E	lysine histidine transporter	-	GO:0001504,GO:0001505,GO:0003333,GO:0003674,GO:0005215,GO:0005310,GO:0005313,GO:0005326,GO:0005342,GO:0005575,GO:0005623,GO:0005886,GO:0006810,GO:0006811,GO:0006812,GO:0006820,GO:0006835,GO:0006836,GO:0006855,GO:0006865,GO:0008150,GO:0008324,GO:0008509,GO:0008514,GO:0009628,GO:0015075,GO:0015171,GO:0015172,GO:0015175,GO:0015179,GO:0015180,GO:0015183,GO:0015238,GO:0015318,GO:0015556,GO:0015711,GO:…	-	ko:K14209	ko04138,map04138	-	-	-	ko00000,ko00001,ko02000,ko04131	2.A.18.8	-	-	Aa_trans
Gene.51990::LRWT_f3p0_2384_transcript22671_g3::g.51990::m.51990	29760.VIT_14s0060g02350.t01	0.0	1009.0	COG0514@1|root,COG1190@1|root,KOG0351@2759|Eukaryota,KOG1885@2759|Eukaryota,37N87@33090|Viridiplantae,3GAI3@35493|Streptophyta	35493|Streptophyta	L	Belongs to the helicase family. RecQ subfamily	-	GO:0000724,GO:0000725,GO:0003674,GO:0003676,GO:0003677,GO:0003678,GO:0003824,GO:0004003,GO:0004386,GO:0005488,GO:0005575,GO:0005622,GO:0005623,GO:0005634,GO:0005694,GO:0005737,GO:0006139,GO:0006259,GO:0006281,GO:0006302,GO:0006310,GO:0006725,GO:0006807,GO:0006950,GO:0006974,GO:0006996,GO:0008026,GO:0008094,GO:0008150,GO:0008152,GO:0009378,GO:0009987,GO:0016043,GO:0016462,GO:0016787,GO:0016817,GO:…	3.6.4.12	ko:K10900	-	-	-	-	ko00000,ko01000,ko03032,ko03400	-	-	-	DEAD,Helicase_C,RecQ_Zn_bind
Gene.131348::LRWT_f3p0_760_transcript76888_g2::g.131348::m.131348	3659.XP_004158877.1	2.29e-37	135.0	2AQVD@1|root,2RZJS@2759|Eukaryota,37UP9@33090|Viridiplantae,3GIWT@35493|Streptophyta,4JQEC@91835|fabids	35493|Streptophyta	B	Histone H1	-	GO:0005575,GO:0005622,GO:0005623,GO:0005634,GO:0005694,GO:0043226,GO:0043227,GO:0043228,GO:0043229,GO:0043231,GO:0043232,GO:0044424,GO:0044464	-	ko:K11275	-	-	-	-	ko00000,ko03036	-	-	-	Linker_histone
Gene.86456::LRWT_f3p0_1579_transcript43256_g3::g.86456::m.86456	218851.Aquca_014_00785.1	3.77e-225	630.0	COG0119@1|root,KOG2367@2759|Eukaryota,37PTT@33090|Viridiplantae,3GAF3@35493|Streptophyta	35493|Streptophyta	E	Belongs to the alpha-IPM synthase homocitrate synthase family	-	GO:0003674,GO:0003824,GO:0003852,GO:0005575,GO:0005622,GO:0005623,GO:0005737,GO:0006082,GO:0006520,GO:0006551,GO:0006807,GO:0008150,GO:0008152,GO:0008652,GO:0009058,GO:0009081,GO:0009082,GO:0009098,GO:0009507,GO:0009526,GO:0009532,GO:0009536,GO:0009570,GO:0009941,GO:0009987,GO:0016053,GO:0016740,GO:0016746,GO:0019752,GO:0031967,GO:0031975,GO:0043226,GO:0043227,GO:0043229,GO:0043231,GO:0043436,GO:…	2.3.3.13	ko:K01649	ko00290,ko00620,ko01100,ko01110,ko01210,ko01230,map00290,map00620,map01100,map01110,map01210,map01230	M00432	R01213	RC00004,RC00470,RC02754	br01601,ko00000,ko00001,ko00002,ko01000	-	-	-	HMGL-like,LeuA_dimer
Gene.109472::LRWT_f159p0_1134_transcript59256_g1::g.109472::m.109472	13333.ERN04243	3.67e-163	463.0	2C0PQ@1|root,2SI6A@2759|Eukaryota,37ZFP@33090|Viridiplantae,3GNB2@35493|Streptophyta	35493|Streptophyta	P	Peroxidase	-	-	1.11.1.7	ko:K00430	ko00940,ko01100,ko01110,map00940,map01100,map01110	-	R00602,R02596,R03919,R04007,R07443	RC00034	ko00000,ko00001,ko01000	-	-	-	peroxidase
Gene.142228::LRWT_f6p0_527_transcript88025_g2::g.142228::m.142228	29730.Gorai.008G153400.1	1.09e-15	75.1	2E354@1|root,2SA9W@2759|Eukaryota,37WWP@33090|Viridiplantae,3GM9W@35493|Streptophyta	35493|Streptophyta	-	-	-	-	-	-	-	-	-	-	-	-	-	-	-
Gene.43231::LRWT_f3p0_2662_transcript18024_g3::g.43231::m.43231	218851.Aquca_002_00036.1	0.0	1206.0	COG1960@1|root,KOG0136@2759|Eukaryota,37MIW@33090|Viridiplantae,3GFAV@35493|Streptophyta	35493|Streptophyta	I	Belongs to the acyl-CoA oxidase family	ACX5	GO:0000166,GO:0001676,GO:0003674,GO:0003824,GO:0003995,GO:0003997,GO:0005488,GO:0005575,GO:0005622,GO:0005623,GO:0005737,GO:0005777,GO:0005911,GO:0006082,GO:0006629,GO:0006631,GO:0006635,GO:0006950,GO:0008150,GO:0008152,GO:0009056,GO:0009058,GO:0009062,GO:0009506,GO:0009605,GO:0009607,GO:0009611,GO:0009620,GO:0009694,GO:0009695,GO:0009987,GO:0010035,GO:0010038,GO:0010817,GO:0016042,GO:0016053,GO:…	1.3.3.6	ko:K00232	ko00071,ko00592,ko01040,ko01100,ko01110,ko01212,ko03320,ko04024,ko04146,map00071,map00592,map01040,map01100,map01110,map01212,map03320,map04024,map04146	M00087,M00113	R01175,R01279,R03777,R03857,R03990,R04751,R04754,R07888,R07892,R07896,R07934,R07950	RC00052,RC00076	ko00000,ko00001,ko00002,ko01000	-	-	-	ACOX,Acyl-CoA_dh_M,Acyl-CoA_ox_N
Gene.55545::LRWT_f6p0_2203_transcript24625_g1::g.55545::m.55545	218851.Aquca_010_00477.1	0.0	1188.0	COG1053@1|root,KOG2403@2759|Eukaryota,37JZR@33090|Viridiplantae,3G82J@35493|Streptophyta	35493|Streptophyta	C	Flavoprotein (FP) subunit of succinate dehydrogenase (SDH) that is involved in complex II of the mitochondrial electron transport chain and is responsible for transferring electrons from succinate to ubiquinone (coenzyme Q)	SDH1-2	GO:0000104,GO:0000166,GO:0003674,GO:0003824,GO:0005488,GO:0005524,GO:0005575,GO:0005618,GO:0005622,GO:0005623,GO:0005737,GO:0005739,GO:0005740,GO:0005743,GO:0005746,GO:0005749,GO:0006082,GO:0006091,GO:0006099,GO:0006101,GO:0006119,GO:0006121,GO:0006139,GO:0006163,GO:0006725,GO:0006753,GO:0006793,GO:0006796,GO:0006807,GO:0008144,GO:0008150,GO:0008152,GO:0009055,GO:0009060,GO:0009061,GO:0009117,GO:…	1.3.5.1	ko:K00234	ko00020,ko00190,ko01100,ko01110,ko01120,ko01130,ko01200,ko04714,ko04932,ko05010,ko05012,ko05016,map00020,map00190,map01100,map01110,map01120,map01130,map01200,map04714,map04932,map05010,map05012,map05016	M00009,M00011,M00148	R02164	RC00045	ko00000,ko00001,ko00002,ko01000	-	-	-	FAD_binding_2,Succ_DH_flav_C
Gene.69084::LRWT_f2p0_1909_transcript32488_g1::g.69084::m.69084	218851.Aquca_020_00490.1	2.16e-224	627.0	COG0115@1|root,KOG0975@2759|Eukaryota,37IQ3@33090|Viridiplantae,3GE3I@35493|Streptophyta	35493|Streptophyta	E	Belongs to the class-IV pyridoxal-phosphate-dependent aminotransferase family	-	-	2.6.1.42	ko:K00826	ko00270,ko00280,ko00290,ko00770,ko01100,ko01110,ko01130,ko01210,ko01230,map00270,map00280,map00290,map00770,map01100,map01110,map01130,map01210,map01230	M00019,M00036,M00119,M00570	R01090,R01214,R02199,R10991	RC00006,RC00036	ko00000,ko00001,ko00002,ko01000,ko01007	-	-	-	Aminotran_4
Gene.71600::LRWT_f2p0_1866_transcript34017_g8::g.71600::m.71600	218851.Aquca_020_00490.1	4.06e-241	670.0	COG0115@1|root,KOG0975@2759|Eukaryota,37IQ3@33090|Viridiplantae,3GE3I@35493|Streptophyta	35493|Streptophyta	E	Belongs to the class-IV pyridoxal-phosphate-dependent aminotransferase family	-	-	2.6.1.42	ko:K00826	ko00270,ko00280,ko00290,ko00770,ko01100,ko01110,ko01130,ko01210,ko01230,map00270,map00280,map00290,map00770,map01100,map01110,map01130,map01210,map01230	M00019,M00036,M00119,M00570	R01090,R01214,R02199,R10991	RC00006,RC00036	ko00000,ko00001,ko00002,ko01000,ko01007	-	-	-	Aminotran_4
Gene.126452::LRWT_f13p0_826_transcript72578_g1::g.126452::m.126452	4641.GSMUA_Achr4P04860_001	1.52e-41	145.0	COG5201@1|root,KOG1724@2759|Eukaryota,37TUD@33090|Viridiplantae,3GI73@35493|Streptophyta,3KZCA@4447|Liliopsida	35493|Streptophyta	O	Belongs to the SKP1 family	-	GO:0000151,GO:0005575,GO:0005622,GO:0005623,GO:0005634,GO:0005730,GO:0005737,GO:0006508,GO:0006511,GO:0006807,GO:0008150,GO:0008152,GO:0009056,GO:0009057,GO:0009987,GO:0019005,GO:0019538,GO:0019941,GO:0030163,GO:0031461,GO:0031974,GO:0031981,GO:0032991,GO:0043170,GO:0043226,GO:0043227,GO:0043228,GO:0043229,GO:0043231,GO:0043232,GO:0043233,GO:0043632,GO:0044237,GO:0044238,GO:0044248,GO:0044257,GO:…	-	ko:K03094	ko04110,ko04111,ko04114,ko04120,ko04141,ko04310,ko04341,ko04350,ko04710,ko05168,ko05200,map04110,map04111,map04114,map04120,map04141,map04310,map04341,map04350,map04710,map05168,map05200	M00379,M00380,M00381,M00382,M00387,M00407,M00411	-	-	ko00000,ko00001,ko00002,ko03036,ko04121	-	-	-	Skp1,Skp1_POZ
Gene.119180::LRWT_f3p0_999_transcript66668_g9::g.119180::m.119180	218851.Aquca_057_00037.1	9.58e-19	89.4	2A1JH@1|root,2RY0Y@2759|Eukaryota,37U8E@33090|Viridiplantae,3GIFP@35493|Streptophyta	35493|Streptophyta	S	mitochondrion organization	-	GO:0003674,GO:0005488,GO:0005515,GO:0005575,GO:0005622,GO:0005623,GO:0005737,GO:0005739,GO:0005740,GO:0005777,GO:0005778,GO:0006996,GO:0007005,GO:0007031,GO:0008150,GO:0009536,GO:0009987,GO:0016020,GO:0016043,GO:0031090,GO:0031903,GO:0031966,GO:0031967,GO:0031975,GO:0042579,GO:0042802,GO:0042803,GO:0043226,GO:0043227,GO:0043229,GO:0043231,GO:0044422,GO:0044424,GO:0044429,GO:0044438,GO:0044439,GO:…	-	ko:K10374	ko04260,ko04261,ko05410,ko05414,map04260,map04261,map05410,map05414	-	-	-	ko00000,ko00001,ko04812	-	-	-	-
Gene.119476::LRWT_f2p0_973_transcript66900_g13::g.119476::m.119476	4096.XP_009801795.1	5.02e-35	133.0	29ZPE@1|root,2RXWQ@2759|Eukaryota,37U2I@33090|Viridiplantae,3GIAV@35493|Streptophyta,44J4E@71274|asterids	35493|Streptophyta	B	Domain in histone families 1 and 5	-	GO:0005575,GO:0005622,GO:0005623,GO:0005634,GO:0005694,GO:0005730,GO:0005737,GO:0005739,GO:0031974,GO:0031981,GO:0043226,GO:0043227,GO:0043228,GO:0043229,GO:0043231,GO:0043232,GO:0043233,GO:0044422,GO:0044424,GO:0044428,GO:0044444,GO:0044446,GO:0044464,GO:0070013	-	ko:K11275	-	-	-	-	ko00000,ko03036	-	-	-	Linker_histone
Gene.123429::LRWT_f14p0_893_transcript70053_g2::g.123429::m.123429	218851.Aquca_055_00004.1	7.27e-95	284.0	KOG0406@1|root,KOG0406@2759|Eukaryota,37T5N@33090|Viridiplantae,3GEHR@35493|Streptophyta	35493|Streptophyta	O	Belongs to the GST superfamily	-	-	2.5.1.18	ko:K00799	ko00480,ko00980,ko00982,ko00983,ko01524,ko05200,ko05204,ko05225,ko05418,map00480,map00980,map00982,map00983,map01524,map05200,map05204,map05225,map05418	-	R03522,R07002,R07003,R07004,R07023,R07024,R07025,R07026,R07069,R07070,R07083,R07084,R07091,R07092,R07093,R07094,R07100,R07113,R07116,R08280,R09409,R11905	RC00004,RC00069,RC00840,RC00948,RC01704,RC01705,RC01706,RC01758,RC01759,RC01765,RC01767,RC01769,RC02243,RC02527,RC02939,RC02940,RC02942,RC02943,RC02944	ko00000,ko00001,ko01000,ko02000	1.A.12.2.2,1.A.12.3.2	-	-	GST_C,GST_N
Gene.142120::LRWT_f9p0_531_transcript87869_g2::g.142120::m.142120	218851.Aquca_017_00060.1	1.38e-28	106.0	2CCMJ@1|root,2S7R3@2759|Eukaryota,37WZS@33090|Viridiplantae,3GKVR@35493|Streptophyta	35493|Streptophyta	-	-	-	-	-	-	-	-	-	-	-	-	-	-	-
Gene.96762::LRWT_f9p0_1370_transcript50179_g1::g.96762::m.96762	218851.Aquca_003_00116.1	2.01e-174	493.0	KOG1558@1|root,KOG1558@2759|Eukaryota,37HN2@33090|Viridiplantae,3GA3Q@35493|Streptophyta	35493|Streptophyta	P	zinc transporter	-	GO:0000041,GO:0003674,GO:0005215,GO:0005385,GO:0005575,GO:0005623,GO:0005886,GO:0006810,GO:0006811,GO:0006812,GO:0006829,GO:0008150,GO:0008324,GO:0015075,GO:0015318,GO:0016020,GO:0022857,GO:0022890,GO:0030001,GO:0034220,GO:0044464,GO:0046873,GO:0046915,GO:0051179,GO:0051234,GO:0055085,GO:0070838,GO:0071577,GO:0071944,GO:0072509,GO:0072511,GO:0098655,GO:0098660,GO:0098662	-	ko:K14709	-	-	-	-	ko00000,ko02000	2.A.5.1,2.A.5.3,2.A.5.6	-	-	Zip
Gene.90545::LRWT_f18p0_1491_transcript45910_g3::g.90545::m.90545	218851.Aquca_003_00116.1	2.17e-174	493.0	KOG1558@1|root,KOG1558@2759|Eukaryota,37HN2@33090|Viridiplantae,3GA3Q@35493|Streptophyta	35493|Streptophyta	P	zinc transporter	-	GO:0000041,GO:0003674,GO:0005215,GO:0005385,GO:0005575,GO:0005623,GO:0005886,GO:0006810,GO:0006811,GO:0006812,GO:0006829,GO:0008150,GO:0008324,GO:0015075,GO:0015318,GO:0016020,GO:0022857,GO:0022890,GO:0030001,GO:0034220,GO:0044464,GO:0046873,GO:0046915,GO:0051179,GO:0051234,GO:0055085,GO:0070838,GO:0071577,GO:0071944,GO:0072509,GO:0072511,GO:0098655,GO:0098660,GO:0098662	-	ko:K14709	-	-	-	-	ko00000,ko02000	2.A.5.1,2.A.5.3,2.A.5.6	-	-	Zip
Gene.118646::LRWT_f6p0_984_transcript66258_g4::g.118646::m.118646	218851.Aquca_020_00249.1	1.42e-123	356.0	KOG0406@1|root,KOG0406@2759|Eukaryota,37SHI@33090|Viridiplantae	33090|Viridiplantae	O	Glutathione transferase GST 23-like	-	-	2.5.1.18	ko:K00799	ko00480,ko00980,ko00982,ko00983,ko01524,ko05200,ko05204,ko05225,ko05418,map00480,map00980,map00982,map00983,map01524,map05200,map05204,map05225,map05418	-	R03522,R07002,R07003,R07004,R07023,R07024,R07025,R07026,R07069,R07070,R07083,R07084,R07091,R07092,R07093,R07094,R07100,R07113,R07116,R08280,R09409,R11905	RC00004,RC00069,RC00840,RC00948,RC01704,RC01705,RC01706,RC01758,RC01759,RC01765,RC01767,RC01769,RC02243,RC02527,RC02939,RC02940,RC02942,RC02943,RC02944	ko00000,ko00001,ko01000,ko02000	1.A.12.2.2,1.A.12.3.2	-	-	GST_C,GST_C_2,GST_N
Gene.123684::LRWT_f2p0_897_transcript70261_g10::g.123684::m.123684	218851.Aquca_020_00249.1	3.87e-111	325.0	KOG0406@1|root,KOG0406@2759|Eukaryota,37SHI@33090|Viridiplantae	33090|Viridiplantae	O	Glutathione transferase GST 23-like	-	-	2.5.1.18	ko:K00799	ko00480,ko00980,ko00982,ko00983,ko01524,ko05200,ko05204,ko05225,ko05418,map00480,map00980,map00982,map00983,map01524,map05200,map05204,map05225,map05418	-	R03522,R07002,R07003,R07004,R07023,R07024,R07025,R07026,R07069,R07070,R07083,R07084,R07091,R07092,R07093,R07094,R07100,R07113,R07116,R08280,R09409,R11905	RC00004,RC00069,RC00840,RC00948,RC01704,RC01705,RC01706,RC01758,RC01759,RC01765,RC01767,RC01769,RC02243,RC02527,RC02939,RC02940,RC02942,RC02943,RC02944	ko00000,ko00001,ko01000,ko02000	1.A.12.2.2,1.A.12.3.2	-	-	GST_C,GST_C_2,GST_N
Gene.121953::LRWT_f3p0_927_transcript68878_g2::g.121953::m.121953	218851.Aquca_020_00249.1	1.35e-118	343.0	KOG0406@1|root,KOG0406@2759|Eukaryota,37SHI@33090|Viridiplantae	33090|Viridiplantae	O	Glutathione transferase GST 23-like	-	-	2.5.1.18	ko:K00799	ko00480,ko00980,ko00982,ko00983,ko01524,ko05200,ko05204,ko05225,ko05418,map00480,map00980,map00982,map00983,map01524,map05200,map05204,map05225,map05418	-	R03522,R07002,R07003,R07004,R07023,R07024,R07025,R07026,R07069,R07070,R07083,R07084,R07091,R07092,R07093,R07094,R07100,R07113,R07116,R08280,R09409,R11905	RC00004,RC00069,RC00840,RC00948,RC01704,RC01705,RC01706,RC01758,RC01759,RC01765,RC01767,RC01769,RC02243,RC02527,RC02939,RC02940,RC02942,RC02943,RC02944	ko00000,ko00001,ko01000,ko02000	1.A.12.2.2,1.A.12.3.2	-	-	GST_C,GST_C_2,GST_N
Gene.99235::LRWT_f23p0_1320_transcript51929_g1::g.99235::m.99235	218851.Aquca_014_00780.1	2.76e-144	415.0	COG3491@1|root,KOG0143@2759|Eukaryota	2759|Eukaryota	V	oxidoreductase activity	-	GO:0000003,GO:0000902,GO:0001101,GO:0003006,GO:0003674,GO:0003824,GO:0005575,GO:0005622,GO:0005623,GO:0005737,GO:0006082,GO:0006629,GO:0006720,GO:0006721,GO:0007154,GO:0007165,GO:0007275,GO:0007568,GO:0008150,GO:0008152,GO:0008299,GO:0008610,GO:0009058,GO:0009314,GO:0009416,GO:0009628,GO:0009648,GO:0009653,GO:0009685,GO:0009686,GO:0009719,GO:0009725,GO:0009739,GO:0009740,GO:0009755,GO:0009791,GO:…	-	-	-	-	-	-	-	-	-	-	2OG-FeII_Oxy,DIOX_N
Gene.84409::LRWT_f4p0_1615_transcript41960_g6::g.84409::m.84409	29760.VIT_14s0030g02180.t01	3e-272	744.0	COG0451@1|root,KOG1429@2759|Eukaryota,37J0N@33090|Viridiplantae,3GBX4@35493|Streptophyta	35493|Streptophyta	GM	GDP-mannose 3,5-epimerase	GME1	-	5.1.3.18	ko:K10046	ko00053,ko00520,ko01100,ko01110,map00053,map00520,map01100,map01110	M00114	R00889,R07672,R07673	RC00289,RC00403,RC01780	ko00000,ko00001,ko00002,ko01000	-	-	-	Epimerase
Gene.86229::LRWT_f2p0_1584_transcript43105_g6::g.86229::m.86229	29760.VIT_14s0030g02180.t01	1.13e-271	744.0	COG0451@1|root,KOG1429@2759|Eukaryota,37J0N@33090|Viridiplantae,3GBX4@35493|Streptophyta	35493|Streptophyta	GM	GDP-mannose 3,5-epimerase	GME1	-	5.1.3.18	ko:K10046	ko00053,ko00520,ko01100,ko01110,map00053,map00520,map01100,map01110	M00114	R00889,R07672,R07673	RC00289,RC00403,RC01780	ko00000,ko00001,ko00002,ko01000	-	-	-	Epimerase
Gene.84836::LRWT_f2p0_1607_transcript42226_g6::g.84836::m.84836	29760.VIT_05s0020g04510.t01	9.96e-112	331.0	COG0451@1|root,KOG1429@2759|Eukaryota,37J0N@33090|Viridiplantae,3GBX4@35493|Streptophyta	35493|Streptophyta	GM	GDP-mannose 3,5-epimerase	GME1	-	5.1.3.18	ko:K10046	ko00053,ko00520,ko01100,ko01110,map00053,map00520,map01100,map01110	M00114	R00889,R07672,R07673	RC00289,RC00403,RC01780	ko00000,ko00001,ko00002,ko01000	-	-	-	Epimerase
Gene.84835::LRWT_f2p0_1607_transcript42226_g6::g.84835::m.84835	29760.VIT_14s0030g02180.t01	8.16e-149	426.0	COG0451@1|root,KOG1429@2759|Eukaryota,37J0N@33090|Viridiplantae,3GBX4@35493|Streptophyta	35493|Streptophyta	GM	GDP-mannose 3,5-epimerase	GME1	-	5.1.3.18	ko:K10046	ko00053,ko00520,ko01100,ko01110,map00053,map00520,map01100,map01110	M00114	R00889,R07672,R07673	RC00289,RC00403,RC01780	ko00000,ko00001,ko00002,ko01000	-	-	-	Epimerase
Gene.120456::LRWT_f4p0_953_transcript67663_g4::g.120456::m.120456	29760.VIT_05s0049g01420.t01	1.04e-122	350.0	KOG1944@1|root,KOG1944@2759|Eukaryota,37NKB@33090|Viridiplantae,3G8MH@35493|Streptophyta	35493|Streptophyta	S	Belongs to the peroxisomal membrane protein PXMP2 4 family	-	GO:0005575,GO:0005622,GO:0005623,GO:0005737,GO:0005777,GO:0005778,GO:0005779,GO:0016020,GO:0016021,GO:0031090,GO:0031224,GO:0031231,GO:0031300,GO:0031301,GO:0031903,GO:0042579,GO:0043226,GO:0043227,GO:0043229,GO:0043231,GO:0044422,GO:0044424,GO:0044425,GO:0044438,GO:0044439,GO:0044444,GO:0044446,GO:0044464,GO:0098588,GO:0098805	-	ko:K13347,ko:K13348	ko04146,map04146	-	-	-	ko00000,ko00001	-	-	-	Mpv17_PMP22
Gene.97185::LRWT_f76p0_1272_transcript50473_g1::g.97185::m.97185	29760.VIT_14s0060g00720.t01	3.5e-207	576.0	COG4586@1|root,KOG2355@2759|Eukaryota,37P2G@33090|Viridiplantae,3GDCZ@35493|Streptophyta	35493|Streptophyta	K	ABC transporter I family member	-	-	-	ko:K12608	ko03018,map03018	-	-	-	ko00000,ko00001,ko03019	-	-	-	ABC_tran
