# Supplementary material for: Integrating Metabolomics and Transcriptomics to Unveil Atisine Biosynthesis in Aconitum gymnandrum Maxim
Source: Int J Mol Sci. 2022 Nov 3;23(21):13463. doi: 10.3390/ijms232113463 (PMC9655601; doi:10.3390/ijms232113463)
Supplement: Supplementary file 1 [file ijms-23-13463-s001.zip › Supplementary Table S6.xlsx]

## Sheet: Sheet1
Supplementary Table S6. Gene in network ranked by Degree method
Name	Score
transcript45862	24
transcript49735	21
transcript19239	21
transcript65043	19
transcript29295	18
transcript49129	17
transcript33670	17
transcript18024	17
transcript49882	16
transcript42527	16
transcript52439	15
transcript32811	15
transcript72154	14
transcript50810	14
transcript39891	14
transcript34187	13
transcript31908	13
transcript31513	13
transcript30474	13
transcript23471	13
transcript62560	12
transcript54970	12
transcript39409	12
transcript9249	11
transcript59503	11
transcript58178	11
transcript47625	11
transcript46650	11
transcript43105	11
transcript29299	11
transcript57716	10
transcript36192	10
transcript30817	10
transcript30671	10
transcript47202	9
transcript43704	9
transcript19296	9
transcript18661	9
transcript17784	9
transcript1704	9
transcript37541	8
transcript57511	7
transcript21356	7
transcript17904	7
transcript54938	6
transcript49184	6
transcript34778	6
transcript24625	6
transcript14997	6
transcript42226	5
transcript33460	5
transcript16995	5
transcript91226	4
transcript66981	4
transcript46339	4
transcript56080	3
transcript53749	3
transcript51929	3
transcript51119	3
transcript50939	3
transcript48588	3
transcript41852	3
transcript34521	3
transcript34443	3
transcript27804	3
transcript19173	3
transcript80012	2
transcript6556	2
transcript44416	2
transcript41802	2
transcript32979	2
transcript32738	2
transcript32578	2
transcript23538	2
transcript20785	2
transcript16317	2
transcript13063	2
